# Supplementary material for: Branched-chain amino acid specialization drove diversification within Calditenuaceae (Caldarchaeia) and enables their cultivation
Source: Research Square preprint supplement (doi:10.21203/rs.3.rs-6038074/v1), 2025-03-26
Supplement: Supplementary file 1 [file 25db949b490d61915e1c0304.xlsx]

## Sheet: Supplementary Table 1
Supplementary Table 1. Microbial composition of sediment at GBS site A (85°C), site B (70°C), and site C (60°C) based on metagenome protein sequence mapping using kraken2
GBS site A (85°C)									GBS site B (70°C)									GBS site C (60°C)
Number of fragments covered	Percentage of fragments covered	Number of fragments assigned directly to this taxon	Number of minimizers found to be associated with a taxon in the read sequences	Estimate of the number of distinct minimizers associated with a taxon in the read sequence data	Rank code	NCBI ID	Indented scientific name		Number of fragments covered	Percentage of fragments covered	Number of fragments assigned directly to this taxon	Number of minimizers found to be associated with a taxon in the read sequences	Estimate of the number of distinct minimizers associated with a taxon in the read sequence data	Rank code	NCBI ID	Indented scientific name		Number of fragments covered	Percentage of fragments covered	Number of fragments assigned directly to this taxon	Number of minimizers found to be associated with a taxon in the read sequences	Estimate of the number of distinct minimizers associated with a taxon in the read sequence data	Rank code	NCBI ID	Indented scientific name
19960	21.97	19960	0	0	U	0	unclassified		78669	31.99	78669	0	0	U	0	unclassified		78669	31.99	78669	0	0	U	0	unclassified
70908	78.03	0	3194559	1560509	R	1	root		167242	68.01	0	6287872	4229747	R	1	root		167242	68.01	0	6287872	4229747	R	1	root
70908	78.03	668	3194559	1560509	R1	131567	cellular organisms		167242	68.01	2309	6287872	4229747	R1	131567	cellular organisms		167242	68.01	2309	6287872	4229747	R1	131567	cellular organisms
27600	30.38	76	894594	321478	D	2157	Archaea		19270	7.84	376	660257	471095	D	2157	Archaea		19270	7.84	376	660257	471095	D	2157	Archaea
27001	29.15	23	870585	306217	D1	1783275	TACK group		13772	5.6	108	489017	352168	D1	1783275	TACK group		13772	5.6	108	489017	352168	D1	1783275	TACK group
23650	25.46	9	722017	208427	P	651137	Nitrososphaerota		8896	3.62	110	304368	183885	P	651137	Nitrososphaerota		8896	3.62	110	304368	183885	P	651137	Nitrososphaerota
23118	24.87	2	699995	191232	P1	651142	Nitrososphaerota incertae sedis		7467	3.04	23	271750	164099	P1	651142	Nitrososphaerota incertae sedis		7467	3.04	23	271750	164099	P1	651142	Nitrososphaerota incertae sedis
21928	23.56	0	636006	131157	O	3071582*	Candidatus Caldarchaeales		5816	2.37	0	231889	130027	O	3071582*	Candidatus Caldarchaeales		5816	2.37	0	231889	130027	O	3071582*	Candidatus Caldarchaeales
21928	23.56	0	636006	131157	F	3079257	Candidatus Calditenuaceae		5816	2.37	0	231889	130027	F	3079257	Candidatus Calditenuaceae		5816	2.37	0	231889	130027	F	3079257	Candidatus Calditenuaceae
21413	23.56	21413	636006	131157	G	3071569	Candidatus Calditenuis		4718	1.92	4718	231889	130027	G	3071569	Candidatus Calditenuis		5816	2.37	4718	231889	130027	G	3071569	Candidatus Calditenuis
515	0.57	515	150646	142244	G	1005443**	Ardentivivens (AigG2)		1098	0.45	1098	154899	139849	G	1005443**	Ardentivivens (AigG2)		1098	0.45	1098	154899	139849	S1	1005443**	Ardentivivens (AigG2)
1179	1.3	0	61621	60454	F	2978049	Candidatus Wolframiiraptoraceae		1518	0.62	0	36564	30874	F	2978049	Candidatus Wolframiiraptoraceae		1518	0.62	0	36564	30874	F	2978049	Candidatus Wolframiiraptoraceae
1179	1.3	1179	61621	60454	G	2978052	Candidatus Wolframiiraptor		1518	0.62	1518	36564	30874	G	2978052	Candidatus Wolframiiraptor		1518	0.62	1518	36564	30874	G	2978052	Candidatus Wolframiiraptor
7	0.01	6	314	230	G	1825023	Candidatus Nitrosotenuis		58	0.02	28	931	622	G	1825023	Candidatus Nitrosotenuis		58	0.02	28	931	622	G	1825023	Candidatus Nitrosotenuis
1	0	1	34	29	S	1846278	Candidatus Nitrosotenuis aquarius		11	0	11	120	86	S	1603555	Candidatus Nitrosotenuis cloacae		11	0	11	120	86	S	1603555	Candidatus Nitrosotenuis cloacae
0	0	0	11	7	S	1353246	Candidatus Nitrosotenuis chungbukensis		9	0	9	134	101	S	1846278	Candidatus Nitrosotenuis aquarius		9	0	9	134	101	S	1846278	Candidatus Nitrosotenuis aquarius
0	0	0	41	30	S	1603555	Candidatus Nitrosotenuis cloacae		9	0	0	137	99	G1	2647429	unclassified Candidatus Nitrosotenuis		9	0	0	137	99	G1	2647429	unclassified Candidatus Nitrosotenuis
0	0	0	36	32	G1	2647429	unclassified Candidatus Nitrosotenuis		9	0	9	137	99	S	2259672	Candidatus Nitrosotenuis sp. DW1		9	0	9	137	99	S	2259672	Candidatus Nitrosotenuis sp. DW1
0	0	0	36	32	S	2259672	Candidatus Nitrosotenuis sp. DW1		1	0	1	43	33	S	1353246	Candidatus Nitrosotenuis chungbukensis		1	0	1	43	33	S	1353246	Candidatus Nitrosotenuis chungbukensis
2	0	0	188	144	G	1078904	Candidatus Nitrosotalea		34	0.01	0	603	355	G	1078904	Candidatus Nitrosotalea		34	0.01	0	603	355	G	1078904	Candidatus Nitrosotalea
2	0	2	188	144	S	1903276	Candidatus Nitrosotalea okcheonensis		34	0.01	34	603	355	S	1903276	Candidatus Nitrosotalea okcheonensis		34	0.01	34	603	355	S	1903276	Candidatus Nitrosotalea okcheonensis
0	0	0	65	58	G	1593364	Candidatus Nitrosopelagicus		18	0.01	0	264	179	G	1593364	Candidatus Nitrosopelagicus		18	0.01	0	264	179	G	1593364	Candidatus Nitrosopelagicus
0	0	0	65	58	S	1410606	Candidatus Nitrosopelagicus brevis		18	0.01	18	264	179	S	1410606	Candidatus Nitrosopelagicus brevis		18	0.01	18	264	179	S	1410606	Candidatus Nitrosopelagicus brevis
510	0.56	16	17720	14058	C	1643678	Nitrososphaeria		1166	0.47	53	23721	17241	C	1643678	Nitrososphaeria		1166	0.47	53	23721	17241	C	1643678	Nitrososphaeria
450	0.5	0	14070	11261	O	1968909	Candidatus Nitrosocaldales		666	0.27	0	15428	11941	O	1968909	Candidatus Nitrosocaldales		666	0.27	0	15428	11941	O	1968909	Candidatus Nitrosocaldales
450	0.5	0	14070	11261	F	1968910	Candidatus Nitrosocaldaceae		666	0.27	0	15428	11941	F	1968910	Candidatus Nitrosocaldaceae		666	0.27	0	15428	11941	F	1968910	Candidatus Nitrosocaldaceae
450	0.5	421	14070	11261	G	498374	Candidatus Nitrosocaldus		666	0.27	561	15428	11941	G	498374	Candidatus Nitrosocaldus		666	0.27	561	15428	11941	G	498374	Candidatus Nitrosocaldus
17	0.02	17	226	198	S	2058097	Candidatus Nitrosocaldus cavascurensis		81	0.03	81	421	72	S	2045011	Candidatus Nitrosocaldus islandicus		81	0.03	81	421	72	S	2045011	Candidatus Nitrosocaldus islandicus
12	0.01	12	63	46	S	2045011	Candidatus Nitrosocaldus islandicus		24	0.01	24	300	206	S	2058097	Candidatus Nitrosocaldus cavascurensis		24	0.01	24	300	206	S	2058097	Candidatus Nitrosocaldus cavascurensis
32	0.04	0	1585	1186	O	1033996	Nitrososphaerales		320	0.13	0	4272	2660	O	1033996	Nitrososphaerales		320	0.13	0	4272	2660	O	1033996	Nitrososphaerales
32	0.04	2	1585	1186	F	1033997	Nitrososphaeraceae		320	0.13	36	4272	2660	F	1033997	Nitrososphaeraceae		320	0.13	36	4272	2660	F	1033997	Nitrososphaeraceae
20	0.02	9	863	627	G	497726	Nitrososphaera		169	0.07	73	2138	1363	G	497726	Nitrososphaera		169	0.07	73	2138	1363	G	497726	Nitrososphaera
10	0.01	0	329	242	S	497727	Candidatus Nitrososphaera gargensis		72	0.03	0	806	510	S	497727	Candidatus Nitrososphaera gargensis		72	0.03	0	806	510	S	497727	Candidatus Nitrososphaera gargensis
10	0.01	10	329	242	S1	1237085	Candidatus Nitrososphaera gargensis Ga9.2		72	0.03	72	806	510	S1	1237085	Candidatus Nitrososphaera gargensis Ga9.2		72	0.03	72	806	510	S1	1237085	Candidatus Nitrososphaera gargensis Ga9.2
1	0	0	56	51	S	1459637	Candidatus Nitrososphaera evergladensis		16	0.01	16	191	129	S	1034015	Nitrososphaera viennensis		16	0.01	16	191	129	S	1034015	Nitrososphaera viennensis
1	0	1	56	51	S1	1459636	Candidatus Nitrososphaera evergladensis SR1		0	0	0	0	0	S1	926571	Nitrososphaera viennensis EN76		0	0	0	0	0	S1	926571	Nitrososphaera viennensis EN76
0	0	0	81	60	S	1034015	Nitrososphaera viennensis		8	0	0	183	138	S	1459637	Candidatus Nitrososphaera evergladensis		8	0	0	183	138	S	1459637	Candidatus Nitrososphaera evergladensis
0	0	0	0	0	S1	926571	Nitrososphaera viennensis EN76		8	0	8	183	138	S1	1459636	Candidatus Nitrososphaera evergladensis SR1		8	0	8	183	138	S1	1459636	Candidatus Nitrososphaera evergladensis SR1
10	0.01	4	568	443	G	1826864	Candidatus Nitrosocosmicus		115	0.05	52	1605	1029	G	1826864	Candidatus Nitrosocosmicus		115	0.05	52	1605	1029	G	1826864	Candidatus Nitrosocosmicus
3	0	3	84	74	S	1798806	Candidatus Nitrosocosmicus franklandus		24	0.01	24	450	282	S	1353260	Candidatus Nitrosocosmicus oleophilus		24	0.01	24	450	282	S	1353260	Candidatus Nitrosocosmicus oleophilus
2	0	2	140	112	S	1353260	Candidatus Nitrosocosmicus oleophilus		23	0.01	23	248	166	S	1826872	Candidatus Nitrosocosmicus hydrocola		23	0.01	23	248	166	S	1826872	Candidatus Nitrosocosmicus hydrocola
1	0	1	75	62	S	1826872	Candidatus Nitrosocosmicus hydrocola		16	0.01	16	272	187	S	1798806	Candidatus Nitrosocosmicus franklandus		16	0.01	16	272	187	S	1798806	Candidatus Nitrosocosmicus franklandus
12	0.01	0	522	434	O	31932	Nitrosopumilales		127	0.05	0	1918	1267	O	31932	Nitrosopumilales		127	0.05	0	1918	1267	O	31932	Nitrosopumilales
12	0.01	3	522	434	F	338190	Nitrosopumilaceae		127	0.05	30	1918	1267	F	338190	Nitrosopumilaceae		127	0.05	30	1918	1267	F	338190	Nitrosopumilaceae
8	0.01	5	332	278	G	338191	Nitrosopumilus		80	0.03	33	1254	852	G	338191	Nitrosopumilus		80	0.03	33	1254	852	G	338191	Nitrosopumilus
1	0	1	19	18	S	1470066	Nitrosopumilus cobalaminigenes		21	0.01	0	348	226	G1	2619919	unclassified Nitrosopumilus		21	0.01	0	348	226	G1	2619919	unclassified Nitrosopumilus
1	0	0	18	18	S	1510466	Candidatus Nitrosopumilus koreensis		16	0.01	16	159	109	S	2024843	Nitrosopumilus sp.		16	0.01	16	159	109	S	2024843	Nitrosopumilus sp.
1	0	1	18	18	S1	1229908	Candidatus Nitrosopumilus koreensis AR1		4	0	4	148	87	S	2795383	Nitrosopumilus sp. K4		4	0	4	148	87	S	2795383	Nitrosopumilus sp. K4
1	0	0	82	58	G1	2619919	unclassified Nitrosopumilus		1	0	1	35	27	S	2508726	Candidatus Nitrosopumilus sp. SW		1	0	1	35	27	S	2508726	Candidatus Nitrosopumilus sp. SW
1	0	1	38	29	S	2024843	Nitrosopumilus sp.		10	0	0	46	35	S	1510466	Candidatus Nitrosopumilus koreensis		10	0	0	46	35	S	1510466	Candidatus Nitrosopumilus koreensis
0	0	0	20	13	S	2508726	Candidatus Nitrosopumilus sp. SW		10	0	10	46	35	S1	1229908	Candidatus Nitrosopumilus koreensis AR1		10	0	10	46	35	S1	1229908	Candidatus Nitrosopumilus koreensis AR1
0	0	0	23	15	S	2795383	Nitrosopumilus sp. K4		6	0	6	51	41	S	1959104	Nitrosopumilus oxyclinae		6	0	6	51	41	S	1959104	Nitrosopumilus oxyclinae
0	0	0	15	12	S	338192	Nitrosopumilus maritimus		3	0	3	47	38	S	1580092	Nitrosopumilus adriaticus		3	0	3	47	38	S	1580092	Nitrosopumilus adriaticus
0	0	0	15	12	S1	436308	Nitrosopumilus maritimus SCM1		2	0	0	27	22	S	338192	Nitrosopumilus maritimus		2	0	0	27	22	S	338192	Nitrosopumilus maritimus
0	0	0	13	12	S	718286	Nitrosopumilus zosterae		2	0	2	27	22	S1	436308	Nitrosopumilus maritimus SCM1		2	0	2	27	22	S1	436308	Nitrosopumilus maritimus SCM1
0	0	0	10	9	S	1229909	Candidatus Nitrosopumilus sediminis		2	0	2	87	60	S	1470067	Nitrosopumilus ureiphilus		2	0	2	87	60	S	1470067	Nitrosopumilus ureiphilus
0	0	0	12	11	S	1470067	Nitrosopumilus ureiphilus		1	0	1	47	36	S	1229909	Candidatus Nitrosopumilus sediminis		1	0	1	47	36	S	1229909	Candidatus Nitrosopumilus sediminis
0	0	0	12	11	S	1580092	Nitrosopumilus adriaticus		1	0	1	58	47	S	1470066	Nitrosopumilus cobalaminigenes		1	0	1	58	47	S	1470066	Nitrosopumilus cobalaminigenes
0	0	0	16	16	S	1582439	Nitrosopumilus piranensis		1	0	1	50	36	S	1582439	Nitrosopumilus piranensis		1	0	1	50	36	S	1582439	Nitrosopumilus piranensis
0	0	0	22	20	S	1959104	Nitrosopumilus oxyclinae		0	0	0	51	43	S	718286	Nitrosopumilus zosterae		0	0	0	51	43	S	718286	Nitrosopumilus zosterae
1	0	0	47	35	G	1993653	Candidatus Nitrosomarinus		9	0	0	182	115	G	1007082	Nitrosarchaeum		9	0	0	182	115	G	1007082	Nitrosarchaeum
1	0	1	47	35	S	1898749	Candidatus Nitrosomarinus catalina		9	0	0	182	115	G1	2641124	unclassified Nitrosarchaeum		9	0	0	182	115	G1	2641124	unclassified Nitrosarchaeum
0	0	0	39	37	G	1007082	Nitrosarchaeum		9	0	9	182	115	S	2259673	Nitrosarchaeum sp. AC2		9	0	9	182	115	S	2259673	Nitrosarchaeum sp. AC2
0	0	0	39	37	G1	2641124	unclassified Nitrosarchaeum		8	0	0	120	83	G	1993653	Candidatus Nitrosomarinus		8	0	0	120	83	G	1993653	Candidatus Nitrosomarinus
0	0	0	39	37	S	2259673	Nitrosarchaeum sp. AC2		8	0	8	120	83	S	1898749	Candidatus Nitrosomarinus catalina		8	0	8	120	83	S	1898749	Candidatus Nitrosomarinus catalina
13	0.01	0	255	222	C	2798274	Conexivisphaeria		153	0.06	0	1794	886	C	2798274	Conexivisphaeria		153	0.06	0	1794	886	C	2798274	Conexivisphaeria
13	0.01	0	255	222	O	2798275	Conexivisphaerales		153	0.06	0	1794	886	O	2798275	Conexivisphaerales		153	0.06	0	1794	886	O	2798275	Conexivisphaerales
13	0.01	0	255	222	F	2798276	Conexivisphaeraceae		153	0.06	0	1794	886	F	2798276	Conexivisphaeraceae		153	0.06	0	1794	886	F	2798276	Conexivisphaeraceae
13	0.01	0	255	222	G	2613912	Conexivisphaera		153	0.06	0	1794	886	G	2613912	Conexivisphaera		153	0.06	0	1794	886	G	2613912	Conexivisphaera
13	0.01	13	255	222	S	1874277	Conexivisphaera calida		153	0.06	153	1794	886	S	1874277	Conexivisphaera calida		153	0.06	153	1794	886	S	1874277	Conexivisphaera calida
3278	3.61	0	138864	89567	P	28889	Thermoproteota		4416	1.8	0	104787	91375	P	28889	Thermoproteota		4416	1.8	0	104787	91375	P	28889	Thermoproteota
3278	3.61	114	138864	89567	C	183924	Thermoprotei		4416	1.8	246	104787	91375	C	183924	Thermoprotei		4416	1.8	246	104787	91375	C	183924	Thermoprotei
1713	1.89	0	108945	67770	O	2266	Thermoproteales		1657	0.67	0	62524	57727	O	2266	Thermoproteales		1657	0.67	0	62524	57727	O	2266	Thermoproteales
1713	1.89	41	108945	67770	F	2267	Thermoproteaceae		1657	0.67	71	62524	57727	F	2267	Thermoproteaceae		1657	0.67	71	62524	57727	F	2267	Thermoproteaceae
1411	1.55	121	87131	55306	G	2276	Pyrobaculum		1344	0.55	173	48374	44863	G	2276	Pyrobaculum		1344	0.55	173	48374	44863	G	2276	Pyrobaculum
368	0.4	368	8253	5678	S	1104324	Pyrobaculum ferrireducens		312	0.13	312	4723	4362	S	1104324	Pyrobaculum ferrireducens		312	0.13	312	4723	4362	S	1104324	Pyrobaculum ferrireducens
240	0.26	0	6183	4156	S	13773	Pyrobaculum aerophilum		219	0.09	0	3534	3206	S	13773	Pyrobaculum aerophilum		219	0.09	0	3534	3206	S	13773	Pyrobaculum aerophilum
240	0.26	240	6183	4156	S1	178306	Pyrobaculum aerophilum str. IM2		219	0.09	219	3534	3206	S1	178306	Pyrobaculum aerophilum str. IM2		219	0.09	219	3534	3206	S1	178306	Pyrobaculum aerophilum str. IM2
193	0.21	0	6249	4169	S	121277	Pyrobaculum arsenaticum		187	0.08	0	3338	2876	S	181486	Pyrobaculum calidifontis		187	0.08	0	3338	2876	S	181486	Pyrobaculum calidifontis
193	0.21	193	6249	4169	S1	340102	Pyrobaculum arsenaticum DSM 13514		187	0.08	187	3338	2876	S1	410359	Pyrobaculum calidifontis JCM 11548		187	0.08	187	3338	2876	S1	410359	Pyrobaculum calidifontis JCM 11548
171	0.19	0	5508	3724	S	181486	Pyrobaculum calidifontis		178	0.07	0	3631	3320	S	121277	Pyrobaculum arsenaticum		178	0.07	0	3631	3320	S	121277	Pyrobaculum arsenaticum
171	0.19	171	5508	3724	S1	410359	Pyrobaculum calidifontis JCM 11548		178	0.07	178	3631	3320	S1	340102	Pyrobaculum arsenaticum DSM 13514		178	0.07	178	3631	3320	S1	340102	Pyrobaculum arsenaticum DSM 13514
166	0.18	0	5675	3812	S	2277	Pyrobaculum islandicum		139	0.06	0	3026	2844	S	2277	Pyrobaculum islandicum		139	0.06	0	3026	2844	S	2277	Pyrobaculum islandicum
166	0.18	166	5675	3812	S1	384616	Pyrobaculum islandicum DSM 4184		139	0.06	139	3026	2844	S1	384616	Pyrobaculum islandicum DSM 4184		139	0.06	139	3026	2844	S1	384616	Pyrobaculum islandicum DSM 4184
152	0.17	0	5397	3691	S	70771	Pyrobaculum neutrophilum		136	0.06	0	2847	2677	S	70771	Pyrobaculum neutrophilum		136	0.06	0	2847	2677	S	70771	Pyrobaculum neutrophilum
152	0.17	152	5397	3691	S1	444157	Pyrobaculum neutrophilum V24Sta		136	0.06	136	2847	2677	S1	444157	Pyrobaculum neutrophilum V24Sta		136	0.06	136	2847	2677	S1	444157	Pyrobaculum neutrophilum V24Sta
158	0.17	25	1601	985	G	164450	Vulcanisaeta		105	0.04	36	1686	1340	G	164450	Vulcanisaeta		105	0.04	36	1686	1340	G	164450	Vulcanisaeta
48	0.05	0	432	211	S	985052	Vulcanisaeta moutnovskia		33	0.01	0	354	260	S	985052	Vulcanisaeta moutnovskia		33	0.01	0	354	260	S	985052	Vulcanisaeta moutnovskia
48	0.05	48	432	211	S1	985053	Vulcanisaeta moutnovskia 768-28		33	0.01	33	354	260	S1	985053	Vulcanisaeta moutnovskia 768-28		33	0.01	33	354	260	S1	985053	Vulcanisaeta moutnovskia 768-28
44	0.05	0	316	215	S	164451	Vulcanisaeta distributa		19	0.01	0	288	251	S	164451	Vulcanisaeta distributa		19	0.01	0	288	251	S	164451	Vulcanisaeta distributa
44	0.05	44	316	215	S1	572478	Vulcanisaeta distributa DSM 14429		19	0.01	19	288	251	S1	572478	Vulcanisaeta distributa DSM 14429		19	0.01	19	288	251	S1	572478	Vulcanisaeta distributa DSM 14429
41	0.05	0	327	211	S	164452	Vulcanisaeta souniana		17	0.01	0	385	310	S	164452	Vulcanisaeta souniana		17	0.01	0	385	310	S	164452	Vulcanisaeta souniana
41	0.05	41	327	211	S1	1293586	Vulcanisaeta souniana JCM 11219		17	0.01	17	385	310	S1	1293586	Vulcanisaeta souniana JCM 11219		17	0.01	17	385	310	S1	1293586	Vulcanisaeta souniana JCM 11219
74	0.08	6	2976	2102	G	2270	Thermoproteus		84	0.03	10	2093	1806	G	2270	Thermoproteus		84	0.03	10	2093	1806	G	2270	Thermoproteus
40	0.04	0	1374	1004	S	184117	Thermoproteus uzoniensis		45	0.02	0	973	854	S	184117	Thermoproteus uzoniensis		45	0.02	0	973	854	S	184117	Thermoproteus uzoniensis
40	0.04	40	1374	1004	S1	999630	Thermoproteus uzoniensis 768-20		45	0.02	45	973	854	S1	999630	Thermoproteus uzoniensis 768-20		45	0.02	45	973	854	S1	999630	Thermoproteus uzoniensis 768-20
28	0.03	0	1159	823	S	2271	Thermoproteus tenax		29	0.01	0	815	690	S	2271	Thermoproteus tenax		29	0.01	0	815	690	S	2271	Thermoproteus tenax
28	0.03	28	1159	823	S1	768679	Thermoproteus tenax Kra 1		29	0.01	29	815	690	S1	768679	Thermoproteus tenax Kra 1		29	0.01	29	815	690	S1	768679	Thermoproteus tenax Kra 1
29	0.03	0	523	399	G	76886	Caldivirga		53	0.02	0	803	624	G	76886	Caldivirga		53	0.02	0	803	624	G	76886	Caldivirga
29	0.03	0	523	399	S	76887	Caldivirga maquilingensis		53	0.02	0	803	624	S	76887	Caldivirga maquilingensis		53	0.02	0	803	624	S	76887	Caldivirga maquilingensis
29	0.03	29	523	399	S1	397948	Caldivirga maquilingensis IC-167		53	0.02	53	803	624	S1	397948	Caldivirga maquilingensis IC-167		53	0.02	53	803	624	S1	397948	Caldivirga maquilingensis IC-167
625	0.69	8	8327	6316	O	114380	Desulfurococcales		1166	0.47	39	13088	10658	O	114380	Desulfurococcales		1166	0.47	39	13088	10658	O	114380	Desulfurococcales
505	0.56	26	5829	4267	F	2272	Desulfurococcaceae		872	0.35	74	9008	7451	F	2272	Desulfurococcaceae		872	0.35	74	9008	7451	F	2272	Desulfurococcaceae
145	0.16	63	1794	1498	G	56635	Aeropyrum		199	0.08	110	1666	1481	G	56635	Aeropyrum		199	0.08	110	1666	1481	G	56635	Aeropyrum
41	0.05	0	300	258	S	56636	Aeropyrum pernix		45	0.02	0	251	224	S	229980	Aeropyrum camini		45	0.02	0	251	224	S	229980	Aeropyrum camini
41	0.05	41	300	258	S1	272557	Aeropyrum pernix K1		45	0.02	45	251	224	S1	1198449	Aeropyrum camini SY1 = JCM 12091		45	0.02	45	251	224	S1	1198449	Aeropyrum camini SY1 = JCM 12091
41	0.05	0	264	225	S	229980	Aeropyrum camini		44	0.02	0	326	292	S	56636	Aeropyrum pernix		44	0.02	0	326	292	S	56636	Aeropyrum pernix
41	0.05	41	264	225	S1	1198449	Aeropyrum camini SY1 = JCM 12091		44	0.02	44	326	292	S1	272557	Aeropyrum pernix K1		44	0.02	44	326	292	S1	272557	Aeropyrum pernix K1
98	0.11	8	1028	655	G	2273	Desulfurococcus		155	0.06	29	1533	1275	G	2273	Desulfurococcus		155	0.06	29	1533	1275	G	2273	Desulfurococcus
46	0.05	7	556	365	S	94694	Desulfurococcus amylolyticus		71	0.03	30	698	580	S	94694	Desulfurococcus amylolyticus		71	0.03	30	698	580	S	94694	Desulfurococcus amylolyticus
22	0.02	22	202	104	S1	490899	Desulfurococcus amylolyticus 1221n		27	0.01	27	148	113	S1	490899	Desulfurococcus amylolyticus 1221n		27	0.01	27	148	113	S1	490899	Desulfurococcus amylolyticus 1221n
17	0.02	17	141	83	S1	768672	Desulfurococcus amylolyticus DSM 16532		14	0.01	14	142	121	S1	768672	Desulfurococcus amylolyticus DSM 16532		14	0.01	14	142	121	S1	768672	Desulfurococcus amylolyticus DSM 16532
44	0.05	0	344	185	S	2275	Desulfurococcus mucosus		55	0.02	0	482	412	S	2275	Desulfurococcus mucosus		55	0.02	0	482	412	S	2275	Desulfurococcus mucosus
44	0.05	44	344	185	S1	765177	Desulfurococcus mucosus DSM 2162		55	0.02	55	482	412	S1	765177	Desulfurococcus mucosus DSM 2162		55	0.02	55	482	412	S1	765177	Desulfurococcus mucosus DSM 2162
79	0.09	13	784	443	G	2279	Staphylothermus		142	0.06	49	1255	966	G	2279	Staphylothermus		142	0.06	49	1255	966	G	2279	Staphylothermus
49	0.05	0	335	89	S	84599	Staphylothermus hellenicus		53	0.02	0	389	290	S	2280	Staphylothermus marinus		53	0.02	0	389	290	S	2280	Staphylothermus marinus
49	0.05	49	335	89	S1	591019	Staphylothermus hellenicus DSM 12710		53	0.02	53	389	290	S1	399550	Staphylothermus marinus F1		53	0.02	53	389	290	S1	399550	Staphylothermus marinus F1
17	0.02	0	204	158	S	2280	Staphylothermus marinus		40	0.02	0	328	246	S	84599	Staphylothermus hellenicus		40	0.02	0	328	246	S	84599	Staphylothermus hellenicus
17	0.02	17	204	158	S1	399550	Staphylothermus marinus F1		40	0.02	40	328	246	S1	591019	Staphylothermus hellenicus DSM 12710		40	0.02	40	328	246	S1	591019	Staphylothermus hellenicus DSM 12710
67	0.07	0	678	450	G	54253	Thermosphaera		139	0.06	0	1329	1154	G	54253	Thermosphaera		139	0.06	0	1329	1154	G	54253	Thermosphaera
67	0.07	18	678	450	S	54254	Thermosphaera aggregans		139	0.06	85	1329	1154	S	54254	Thermosphaera aggregans		139	0.06	85	1329	1154	S	54254	Thermosphaera aggregans
49	0.05	49	383	189	S1	633148	Thermosphaera aggregans DSM 11486		54	0.02	54	335	282	S1	633148	Thermosphaera aggregans DSM 11486		54	0.02	54	335	282	S1	633148	Thermosphaera aggregans DSM 11486
52	0.06	0	480	337	G	477695	Thermogladius		89	0.04	14	930	723	G	54258	Ignicoccus		89	0.04	14	930	723	G	54258	Ignicoccus
52	0.06	0	480	337	S	1200300	Thermogladius calderae		50	0.02	0	390	309	S	54259	Ignicoccus islandicus		50	0.02	0	390	309	S	54259	Ignicoccus islandicus
52	0.06	52	480	337	S1	1184251	Thermogladius calderae 1633		50	0.02	50	390	309	S1	940295	Ignicoccus islandicus DSM 13165		50	0.02	50	390	309	S1	940295	Ignicoccus islandicus DSM 13165
38	0.04	11	445	371	G	54258	Ignicoccus		25	0.01	0	336	263	S	160233	Ignicoccus hospitalis		25	0.01	0	336	263	S	160233	Ignicoccus hospitalis
17	0.02	0	170	142	S	160233	Ignicoccus hospitalis		25	0.01	25	336	263	S1	453591	Ignicoccus hospitalis KIN4/I		25	0.01	25	336	263	S1	453591	Ignicoccus hospitalis KIN4/I
17	0.02	17	170	142	S1	453591	Ignicoccus hospitalis KIN4/I		74	0.03	0	746	630	G	477695	Thermogladius		74	0.03	0	746	630	G	477695	Thermogladius
10	0.01	0	203	169	S	54259	Ignicoccus islandicus		74	0.03	0	746	630	S	1200300	Thermogladius calderae		74	0.03	0	746	630	S	1200300	Thermogladius calderae
10	0.01	10	203	169	S1	940295	Ignicoccus islandicus DSM 13165		74	0.03	74	746	630	S1	1184251	Thermogladius calderae 1633		74	0.03	74	746	630	S1	1184251	Thermogladius calderae 1633
112	0.12	20	1953	1603	F	2307	Pyrodictiaceae		255	0.1	56	3179	2553	F	2307	Pyrodictiaceae		255	0.1	56	3179	2553	F	2307	Pyrodictiaceae
31	0.03	6	495	373	G	2308	Pyrodictium		66	0.03	0	679	533	G	54251	Pyrolobus		66	0.03	0	679	533	G	54251	Pyrolobus
15	0.02	15	175	126	S	54256	Pyrodictium abyssi		66	0.03	0	679	533	S	54252	Pyrolobus fumarii		66	0.03	0	679	533	S	54252	Pyrolobus fumarii
10	0.01	10	139	109	S	1273541	Pyrodictium delaneyi		66	0.03	66	679	533	S1	694429	Pyrolobus fumarii 1A		66	0.03	66	679	533	S1	694429	Pyrolobus fumarii 1A
28	0.03	0	367	326	G	54251	Pyrolobus		53	0.02	23	774	638	G	2308	Pyrodictium		53	0.02	23	774	638	G	2308	Pyrodictium
28	0.03	0	367	326	S	54252	Pyrolobus fumarii		17	0.01	17	260	221	S	54256	Pyrodictium abyssi		17	0.01	17	260	221	S	54256	Pyrodictium abyssi
28	0.03	28	367	326	S1	694429	Pyrolobus fumarii 1A		13	0.01	13	233	192	S	1273541	Pyrodictium delaneyi		13	0.01	13	233	192	S	1273541	Pyrodictium delaneyi
18	0.02	0	316	262	G	3088728	Pyrofollis		44	0.02	0	595	477	G	3088728	Pyrofollis		44	0.02	0	595	477	G	3088728	Pyrofollis
18	0.02	18	316	262	S	3060460	Pyrofollis japonicus		44	0.02	44	595	477	S	3060460	Pyrofollis japonicus		44	0.02	44	595	477	S	3060460	Pyrofollis japonicus
15	0.02	0	271	226	G	54247	Hyperthermus		36	0.01	0	429	362	G	54247	Hyperthermus		36	0.01	0	429	362	G	54247	Hyperthermus
15	0.02	0	271	226	S	54248	Hyperthermus butylicus		36	0.01	0	429	362	S	54248	Hyperthermus butylicus		36	0.01	0	429	362	S	54248	Hyperthermus butylicus
15	0.02	15	271	226	S1	415426	Hyperthermus butylicus DSM 5456		36	0.01	36	429	362	S1	415426	Hyperthermus butylicus DSM 5456		36	0.01	36	429	362	S1	415426	Hyperthermus butylicus DSM 5456
463	0.51	0	5029	4295	O	2856582	Thermofilales		637	0.26	0	8919	7144	O	2856582	Thermofilales		637	0.26	0	8919	7144	O	2856582	Thermofilales
463	0.51	32	5029	4295	F	114378	Thermofilaceae		637	0.26	51	8919	7144	F	114378	Thermofilaceae		637	0.26	51	8919	7144	F	114378	Thermofilaceae
218	0.24	13	2006	1674	G	2268	Thermofilum		306	0.12	35	3412	2723	G	2856573	Infirmifilum		306	0.12	35	3412	2723	G	2856573	Infirmifilum
122	0.13	88	1159	886	S	1365176	Thermofilum adornatum		107	0.04	0	887	704	G1	2856574	unclassified Infirmifilum		107	0.04	0	887	704	G1	2856574	unclassified Infirmifilum
34	0.04	34	345	162	S1	697581	Thermofilum adornatum 1505		107	0.04	107	887	704	S	2926850	Infirmifilum sp. NZ		107	0.04	107	887	704	S	2926850	Infirmifilum sp. NZ
83	0.09	0	665	621	S	2269	Thermofilum pendens		89	0.04	89	950	758	S	1550241	Infirmifilum uzonense		89	0.04	89	950	758	S	1550241	Infirmifilum uzonense
83	0.09	83	665	621	S1	368408	Thermofilum pendens Hrk 5		75	0.03	75	716	566	S	2776706	Infirmifilum lucidum		75	0.03	75	716	566	S	2776706	Infirmifilum lucidum
213	0.23	35	1878	1565	G	2856573	Infirmifilum		280	0.11	15	3481	2801	G	2268	Thermofilum		280	0.11	15	3481	2801	G	2268	Thermofilum
61	0.07	61	541	397	S	2776706	Infirmifilum lucidum		153	0.06	123	1801	1439	S	1365176	Thermofilum adornatum		153	0.06	123	1801	1439	S	1365176	Thermofilum adornatum
61	0.07	0	497	393	G1	2856574	unclassified Infirmifilum		30	0.01	30	246	176	S1	697581	Thermofilum adornatum 1505		30	0.01	30	246	176	S1	697581	Thermofilum adornatum 1505
61	0.07	61	497	393	S	2926850	Infirmifilum sp. NZ		112	0.05	0	1339	1091	S	2269	Thermofilum pendens		112	0.05	0	1339	1091	S	2269	Thermofilum pendens
56	0.06	56	420	387	S	1550241	Infirmifilum uzonense		112	0.05	112	1339	1091	S1	368408	Thermofilum pendens Hrk 5		112	0.05	112	1339	1091	S1	368408	Thermofilum pendens Hrk 5
221	0.24	0	4303	3538	O	2281	Sulfolobales		499	0.2	0	7853	6207	O	2281	Sulfolobales		499	0.2	0	7853	6207	O	2281	Sulfolobales
221	0.24	46	4303	3538	F	118883	Sulfolobaceae		499	0.2	145	7853	6207	F	118883	Sulfolobaceae		499	0.2	145	7853	6207	F	118883	Sulfolobaceae
46	0.05	1	596	453	G	2284	Sulfolobus		89	0.04	22	1232	1005	G	12914	Acidianus		89	0.04	22	1232	1005	G	12914	Acidianus
17	0.02	2	107	42	S	43080	Sulfolobus islandicus		24	0.01	24	266	218	S	41673	Acidianus brierleyi		24	0.01	24	266	218	S	41673	Acidianus brierleyi
7	0.01	7	7	1	S1	1132497	Sulfolobus islandicus M.16.2		20	0.01	0	174	135	G1	2629519	unclassified Acidianus		20	0.01	0	174	135	G1	2629519	unclassified Acidianus
7	0.01	7	43	4	S1	1241935	Sulfolobus islandicus LAL14/1		20	0.01	20	174	135	S	2886040	Acidianus sp. HS-5		20	0.01	20	174	135	S	2886040	Acidianus sp. HS-5
1	0	1	3	3	S1	419942	Sulfolobus islandicus Y.N.15.51		13	0.01	13	165	141	S	282676	Acidianus manzaensis		13	0.01	13	165	141	S	282676	Acidianus manzaensis
0	0	0	1	1	S1	425944	Sulfolobus islandicus L.D.8.5		8	0	0	154	134	S	312539	Acidianus sulfidivorans		8	0	0	154	134	S	312539	Acidianus sulfidivorans
0	0	0	0	0	S1	426118	Sulfolobus islandicus M.16.4		8	0	8	154	134	S1	619593	Acidianus sulfidivorans JP7		8	0	8	154	134	S1	619593	Acidianus sulfidivorans JP7
0	0	0	1	1	S1	427317	Sulfolobus islandicus M.14.25		2	0	2	40	35	S	2283	Acidianus ambivalens		2	0	2	40	35	S	2283	Acidianus ambivalens
0	0	0	0	0	S1	427318	Sulfolobus islandicus M.16.27		0	0	0	31	27	S	563177	Acidianus hospitalis		0	0	0	31	27	S	563177	Acidianus hospitalis
0	0	0	5	3	S1	429572	Sulfolobus islandicus L.S.2.15		0	0	0	31	27	S1	933801	Acidianus hospitalis W1		0	0	0	31	27	S1	933801	Acidianus hospitalis W1
0	0	0	4	3	S1	439386	Sulfolobus islandicus Y.G.57.14		80	0.03	7	1142	935	G	2284	Sulfolobus		80	0.03	7	1142	935	G	2284	Sulfolobus
0	0	0	0	0	S1	930943	Sulfolobus islandicus HVE10/4		26	0.01	4	382	336	G1	2641160	unclassified Sulfolobus		26	0.01	4	382	336	G1	2641160	unclassified Sulfolobus
0	0	0	5	3	S1	930945	Sulfolobus islandicus REY15A		13	0.01	13	198	175	S	1891280	Sulfolobus sp. A20		13	0.01	13	198	175	S	1891280	Sulfolobus sp. A20
0	0	0	0	0	S1	1132501	Sulfolobus islandicus M.16.23		6	0	6	77	66	S	2512240	Sulfolobus sp. S-194		6	0	6	77	66	S	2512240	Sulfolobus sp. S-194
0	0	0	0	0	S1	1132503	Sulfolobus islandicus M.16.40		2	0	2	13	13	S	2663020	Sulfolobus sp. E11-6		2	0	2	13	13	S	2663020	Sulfolobus sp. E11-6
0	0	0	0	0	S1	1132504	Sulfolobus islandicus M.16.43		1	0	1	21	20	S	2663019	Sulfolobus sp. E5-1-F		1	0	1	21	20	S	2663019	Sulfolobus sp. E5-1-F
0	0	0	0	0	S1	1132506	Sulfolobus islandicus M.16.47		24	0.01	24	309	245	S	2285	Sulfolobus acidocaldarius		24	0.01	24	309	245	S	2285	Sulfolobus acidocaldarius
14	0.02	5	156	145	G1	2641160	unclassified Sulfolobus		0	0	0	0	0	S1	330779	Sulfolobus acidocaldarius DSM 639		0	0	0	0	0	S1	330779	Sulfolobus acidocaldarius DSM 639
7	0.01	7	92	89	S	1891280	Sulfolobus sp. A20		0	0	0	0	0	S1	1028566	Sulfolobus acidocaldarius N8		0	0	0	0	0	S1	1028566	Sulfolobus acidocaldarius N8
1	0	1	20	17	S	2512240	Sulfolobus sp. S-194		0	0	0	0	0	S1	1028567	Sulfolobus acidocaldarius Ron12/I		0	0	0	0	0	S1	1028567	Sulfolobus acidocaldarius Ron12/I
1	0	1	13	13	S	2663019	Sulfolobus sp. E5-1-F		16	0.01	16	226	180	S	207809	Sulfolobus tengchongensis		16	0.01	16	226	180	S	207809	Sulfolobus tengchongensis
0	0	0	2	2	S	2663020	Sulfolobus sp. E11-6		7	0	7	160	122	S	43080	Sulfolobus islandicus		7	0	7	160	122	S	43080	Sulfolobus islandicus
8	0.01	8	111	85	S	207809	Sulfolobus tengchongensis		0	0	0	4	4	S1	419942	Sulfolobus islandicus Y.N.15.51		0	0	0	4	4	S1	419942	Sulfolobus islandicus Y.N.15.51
6	0.01	6	187	156	S	2285	Sulfolobus acidocaldarius		0	0	0	4	3	S1	425944	Sulfolobus islandicus L.D.8.5		0	0	0	4	3	S1	425944	Sulfolobus islandicus L.D.8.5
0	0	0	0	0	S1	330779	Sulfolobus acidocaldarius DSM 639		0	0	0	1	1	S1	426118	Sulfolobus islandicus M.16.4		0	0	0	1	1	S1	426118	Sulfolobus islandicus M.16.4
0	0	0	0	0	S1	1028566	Sulfolobus acidocaldarius N8		0	0	0	1	1	S1	427317	Sulfolobus islandicus M.14.25		0	0	0	1	1	S1	427317	Sulfolobus islandicus M.14.25
0	0	0	0	0	S1	1028567	Sulfolobus acidocaldarius Ron12/I		0	0	0	1	1	S1	427318	Sulfolobus islandicus M.16.27		0	0	0	1	1	S1	427318	Sulfolobus islandicus M.16.27
28	0.03	7	399	326	G	41980	Metallosphaera		0	0	0	9	6	S1	429572	Sulfolobus islandicus L.S.2.15		0	0	0	9	6	S1	429572	Sulfolobus islandicus L.S.2.15
7	0.01	0	61	49	S	79601	Metallosphaera hakonensis		0	0	0	6	6	S1	439386	Sulfolobus islandicus Y.G.57.14		0	0	0	6	6	S1	439386	Sulfolobus islandicus Y.G.57.14
7	0.01	7	61	49	S1	1293036	Metallosphaera hakonensis JCM 8857 = DSM 7519		0	0	0	0	0	S1	930943	Sulfolobus islandicus HVE10/4		0	0	0	0	0	S1	930943	Sulfolobus islandicus HVE10/4
7	0.01	7	92	61	S	1532350	Metallosphaera tengchongensis		0	0	0	3	2	S1	930945	Sulfolobus islandicus REY15A		0	0	0	3	2	S1	930945	Sulfolobus islandicus REY15A
6	0.01	0	73	65	S	1006005	Metallosphaera cuprina		0	0	0	2	2	S1	1132497	Sulfolobus islandicus M.16.2		0	0	0	2	2	S1	1132497	Sulfolobus islandicus M.16.2
6	0.01	6	73	65	S1	1006006	Metallosphaera cuprina Ar-4		0	0	0	0	0	S1	1132501	Sulfolobus islandicus M.16.23		0	0	0	0	0	S1	1132501	Sulfolobus islandicus M.16.23
1	0	1	5	5	S	43687	Metallosphaera sedula		0	0	0	4	4	S1	1132503	Sulfolobus islandicus M.16.40		0	0	0	4	4	S1	1132503	Sulfolobus islandicus M.16.40
0	0	0	0	0	S	47304	Metallosphaera prunae		0	0	0	0	0	S1	1132504	Sulfolobus islandicus M.16.43		0	0	0	0	0	S1	1132504	Sulfolobus islandicus M.16.43
26	0.03	4	249	179	G	41674	Stygiolobus		0	0	0	0	0	S1	1132506	Sulfolobus islandicus M.16.47		0	0	0	0	0	S1	1132506	Sulfolobus islandicus M.16.47
16	0.02	16	127	75	S	41675	Stygiolobus azoricus		0	0	0	1	1	S1	1241935	Sulfolobus islandicus LAL14/1		0	0	0	1	1	S1	1241935	Sulfolobus islandicus LAL14/1
6	0.01	6	73	64	S	2824673	Stygiolobus caldivivus		51	0.02	19	838	682	G	41980	Metallosphaera		51	0.02	19	838	682	G	41980	Metallosphaera
25	0.03	0	317	245	G	2100760	Saccharolobus		12	0	0	176	135	S	1006005	Metallosphaera cuprina		12	0	0	176	135	S	1006005	Metallosphaera cuprina
10	0.01	6	122	75	S	2286	Saccharolobus shibatae		12	0	12	176	135	S1	1006006	Metallosphaera cuprina Ar-4		12	0	12	176	135	S1	1006006	Metallosphaera cuprina Ar-4
4	0	4	14	12	S1	523848	Saccharolobus shibatae B12		10	0	10	180	149	S	1532350	Metallosphaera tengchongensis		10	0	10	180	149	S	1532350	Metallosphaera tengchongensis
9	0.01	8	67	49	S	2287	Saccharolobus solfataricus		9	0	0	135	116	S	79601	Metallosphaera hakonensis		9	0	0	135	116	S	79601	Metallosphaera hakonensis
1	0	1	1	1	S1	273057	Saccharolobus solfataricus P2		9	0	9	135	116	S1	1293036	Metallosphaera hakonensis JCM 8857 = DSM 7519		9	0	9	135	116	S1	1293036	Metallosphaera hakonensis JCM 8857 = DSM 7519
6	0.01	6	128	121	S	1702097	Saccharolobus caldissimus		1	0	1	8	7	S	43687	Metallosphaera sedula		1	0	1	8	7	S	43687	Metallosphaera sedula
23	0.03	7	574	482	G	12914	Acidianus		0	0	0	0	0	S	47304	Metallosphaera prunae		0	0	0	0	0	S	47304	Metallosphaera prunae
7	0.01	7	123	96	S	41673	Acidianus brierleyi		36	0.01	10	379	306	G	41674	Stygiolobus		36	0.01	10	379	306	G	41674	Stygiolobus
4	0	0	69	53	S	312539	Acidianus sulfidivorans		18	0.01	18	132	106	S	41675	Stygiolobus azoricus		18	0.01	18	132	106	S	41675	Stygiolobus azoricus
4	0	4	69	53	S1	619593	Acidianus sulfidivorans JP7		8	0	8	152	121	S	2824673	Stygiolobus caldivivus		8	0	8	152	121	S	2824673	Stygiolobus caldivivus
3	0	0	85	72	G1	2629519	unclassified Acidianus		34	0.01	1	469	379	G	2100760	Saccharolobus		34	0.01	1	469	379	G	2100760	Saccharolobus
3	0	3	85	72	S	2886040	Acidianus sp. HS-5		12	0	12	248	201	S	1702097	Saccharolobus caldissimus		12	0	12	248	201	S	1702097	Saccharolobus caldissimus
2	0	2	77	63	S	282676	Acidianus manzaensis		11	0	10	102	85	S	2287	Saccharolobus solfataricus		11	0	10	102	85	S	2287	Saccharolobus solfataricus
0	0	0	8	8	S	2283	Acidianus ambivalens		1	0	1	1	1	S1	273057	Saccharolobus solfataricus P2		1	0	1	1	1	S1	273057	Saccharolobus solfataricus P2
0	0	0	9	7	S	563177	Acidianus hospitalis		10	0	7	108	82	S	2286	Saccharolobus shibatae		10	0	7	108	82	S	2286	Saccharolobus shibatae
0	0	0	9	7	S1	933801	Acidianus hospitalis W1		3	0	3	24	20	S1	523848	Saccharolobus shibatae B12		3	0	3	24	20	S1	523848	Saccharolobus shibatae B12
12	0.01	0	221	191	G	2017961	Sulfodiicoccus		29	0.01	0	450	328	G	2017961	Sulfodiicoccus		29	0.01	0	450	328	G	2017961	Sulfodiicoccus
12	0.01	12	221	191	S	1670455	Sulfodiicoccus acidiphilus		29	0.01	29	450	328	S	1670455	Sulfodiicoccus acidiphilus		29	0.01	29	450	328	S	1670455	Sulfodiicoccus acidiphilus
11	0.01	0	108	88	G	2705406	Sulfuracidifex		26	0.01	0	281	222	G	2705406	Sulfuracidifex		26	0.01	0	281	222	G	2705406	Sulfuracidifex
11	0.01	11	108	88	S	1294262	Sulfuracidifex tepidarius		26	0.01	26	281	222	S	1294262	Sulfuracidifex tepidarius		26	0.01	26	281	222	S	1294262	Sulfuracidifex tepidarius
4	0	1	60	43	G	69655	Sulfurisphaera		9	0	7	131	112	G	69655	Sulfurisphaera		9	0	7	131	112	G	69655	Sulfurisphaera
3	0	3	27	12	S	69656	Sulfurisphaera ohwakuensis		2	0	0	33	30	S	111955	Sulfurisphaera tokodaii		2	0	0	33	30	S	111955	Sulfurisphaera tokodaii
0	0	0	10	10	S	111955	Sulfurisphaera tokodaii		2	0	2	33	30	S1	273063	Sulfurisphaera tokodaii str. 7		2	0	2	33	30	S1	273063	Sulfurisphaera tokodaii str. 7
0	0	0	10	10	S1	273063	Sulfurisphaera tokodaii str. 7		0	0	0	30	23	S	69656	Sulfurisphaera ohwakuensis		0	0	0	30	23	S	69656	Sulfurisphaera ohwakuensis
119	0.13	2	1711	1264	O	871006	Acidilobales		156	0.06	6	1929	1583	O	871006	Acidilobales		156	0.06	6	1929	1583	O	871006	Acidilobales
100	0.11	0	1089	701	F	871007	Acidilobaceae		96	0.04	0	1067	881	F	871007	Acidilobaceae		96	0.04	0	1067	881	F	871007	Acidilobaceae
100	0.11	7	1089	701	G	105850	Acidilobus		96	0.04	26	1067	881	G	105850	Acidilobus		96	0.04	26	1067	881	G	105850	Acidilobus
78	0.09	0	505	224	G1	2635519	unclassified Acidilobus		37	0.02	0	341	292	S	242703	Acidilobus saccharovorans		37	0.02	0	341	292	S	242703	Acidilobus saccharovorans
78	0.09	78	505	224	S	1577685	Acidilobus sp. 7A		37	0.02	37	341	292	S1	666510	Acidilobus saccharovorans 345-15		37	0.02	37	341	292	S1	666510	Acidilobus saccharovorans 345-15
15	0.02	0	285	219	S	242703	Acidilobus saccharovorans		33	0.01	0	371	295	G1	2635519	unclassified Acidilobus		33	0.01	0	371	295	G1	2635519	unclassified Acidilobus
15	0.02	15	285	219	S1	666510	Acidilobus saccharovorans 345-15		33	0.01	33	371	295	S	1577685	Acidilobus sp. 7A		33	0.01	33	371	295	S	1577685	Acidilobus sp. 7A
17	0.02	0	445	403	F	255472	Caldisphaeraceae		54	0.02	0	630	527	F	255472	Caldisphaeraceae		54	0.02	0	630	527	F	255472	Caldisphaeraceae
17	0.02	0	445	403	G	200414	Caldisphaera		54	0.02	0	630	527	G	200414	Caldisphaera		54	0.02	0	630	527	G	200414	Caldisphaera
17	0.02	0	445	403	S	200415	Caldisphaera lagunensis		54	0.02	0	630	527	S	200415	Caldisphaera lagunensis		54	0.02	0	630	527	S	200415	Caldisphaera lagunensis
17	0.02	17	445	403	S1	1056495	Caldisphaera lagunensis DSM 15908		54	0.02	54	630	527	S1	1056495	Caldisphaera lagunensis DSM 15908		54	0.02	54	630	527	S1	1056495	Caldisphaera lagunensis DSM 15908
23	0.03	0	426	316	O	685948	Fervidicoccales		55	0.02	0	845	677	O	685948	Fervidicoccales		55	0.02	0	845	677	O	685948	Fervidicoccales
23	0.03	0	426	316	F	685949	Fervidicoccaceae		55	0.02	0	845	677	F	685949	Fervidicoccaceae		55	0.02	0	845	677	F	685949	Fervidicoccaceae
23	0.03	0	426	316	G	685950	Fervidicoccus		55	0.02	0	845	677	G	685950	Fervidicoccus		55	0.02	0	845	677	G	685950	Fervidicoccus
23	0.03	0	426	316	S	683846	Fervidicoccus fontis		55	0.02	0	845	677	S	683846	Fervidicoccus fontis		55	0.02	0	845	677	S	683846	Fervidicoccus fontis
23	0.03	23	426	316	S1	1163730	Fervidicoccus fontis Kam940		55	0.02	55	845	677	S1	1163730	Fervidicoccus fontis Kam940		55	0.02	55	845	677	S1	1163730	Fervidicoccus fontis Kam940
50	0.06	0	661	526	P	51967	Candidatus Korarchaeota		352	0.14	0	70420	67956	P	51967	Candidatus Korarchaeota		352	0.14	0	70420	67956	P	51967	Candidatus Korarchaeota
50	0.06	0	661	526	G	498845	Candidatus Korarchaeum		352	0.14	0	70420	67956	G	498845	Candidatus Korarchaeum		352	0.14	0	70420	67956	G	498845	Candidatus Korarchaeum
50	0.06	0	661	526	S	498846	Candidatus Korarchaeum cryptofilum		352	0.14	0	70420	67956	S	498846	Candidatus Korarchaeum cryptofilum		352	0.14	0	70420	67956	S	498846	Candidatus Korarchaeum cryptofilum
50	0.06	50	661	526	S1	374847	Candidatus Korarchaeum cryptofilum OPF8		352	0.14	352	70420	67956	S1	374847	Candidatus Korarchaeum cryptofilum OPF8		352	0.14	352	70420	67956	S1	374847	Candidatus Korarchaeum cryptofilum OPF8
436	0.48	20	9511	7533	P	28890	Euryarchaeota		4822	1.96	219	137726	109169	P	28890	Euryarchaeota		4822	1.96	219	137726	109169	P	28890	Euryarchaeota
193	0.21	2	4491	3436	P1	2290931	Stenosarchaea group		1761	0.72	0	72710	61859	C	183980	Archaeoglobi		1761	0.72	0	72710	61859	C	183980	Archaeoglobi
114	0.13	5	2001	1545	C	224756	Methanomicrobia		1761	0.72	0	72710	61859	O	2231	Archaeoglobales		1761	0.72	0	72710	61859	O	2231	Archaeoglobales
47	0.05	0	939	735	O	94695	Methanosarcinales		1761	0.72	66	72710	61859	F	2232	Archaeoglobaceae		1761	0.72	66	72710	61859	F	2232	Archaeoglobaceae
47	0.05	6	939	735	F	2206	Methanosarcinaceae		1310	0.53	29	46098	40054	G	2233	Archaeoglobus		1310	0.53	29	46098	40054	G	2233	Archaeoglobus
10	0.01	3	339	279	G	2207	Methanosarcina		1075	0.44	848	34858	30820	S	2234	Archaeoglobus fulgidus		1075	0.44	848	34858	30820	S	2234	Archaeoglobus fulgidus
4	0	2	45	37	S	2208	Methanosarcina barkeri		121	0.05	121	687	601	S1	1344584	Archaeoglobus fulgidus DSM 8774		121	0.05	121	687	601	S1	1344584	Archaeoglobus fulgidus DSM 8774
2	0	2	15	14	S1	1434109	Methanosarcina barkeri str. Wiesmoor		106	0.04	106	910	773	S1	224325	Archaeoglobus fulgidus DSM 4304		106	0.04	106	910	773	S1	224325	Archaeoglobus fulgidus DSM 4304
0	0	0	0	0	S1	796385	Methanosarcina barkeri CM1		77	0.03	0	2274	2004	S	84156	Archaeoglobus profundus		77	0.03	0	2274	2004	S	84156	Archaeoglobus profundus
0	0	0	1	1	S1	1434106	Methanosarcina barkeri 227		77	0.03	77	2274	2004	S1	572546	Archaeoglobus profundus DSM 5631		77	0.03	77	2274	2004	S1	572546	Archaeoglobus profundus DSM 5631
0	0	0	10	9	S1	1434107	Methanosarcina barkeri 3		66	0.03	0	2039	1698	S	1316941	Archaeoglobus sulfaticallidus		66	0.03	0	2039	1698	S	1316941	Archaeoglobus sulfaticallidus
0	0	0	1	1	S1	1434108	Methanosarcina barkeri MS		66	0.03	66	2039	1698	S1	387631	Archaeoglobus sulfaticallidus PM70-1		66	0.03	66	2039	1698	S1	387631	Archaeoglobus sulfaticallidus PM70-1
1	0	1	50	30	S	2209	Methanosarcina mazei		63	0.03	0	1762	1503	S	58290	Archaeoglobus veneficus		63	0.03	0	1762	1503	S	58290	Archaeoglobus veneficus
0	0	0	0	0	S1	192952	Methanosarcina mazei Go1		63	0.03	63	1762	1503	S1	693661	Archaeoglobus veneficus SNP6		63	0.03	63	1762	1503	S1	693661	Archaeoglobus veneficus SNP6
0	0	0	1	1	S1	213585	Methanosarcina mazei S-6		287	0.12	19	8095	7399	G	190818	Geoglobus		287	0.12	19	8095	7399	G	190818	Geoglobus
0	0	0	0	0	S1	1236903	Methanosarcina mazei Tuc01		145	0.06	145	3052	2835	S	113653	Geoglobus ahangari		145	0.06	145	3052	2835	S	113653	Geoglobus ahangari
0	0	0	18	1	S1	1434113	Methanosarcina mazei C16		123	0.05	123	2919	2590	S	565033	Geoglobus acetivorans		123	0.05	123	2919	2590	S	565033	Geoglobus acetivorans
0	0	0	4	4	S1	1434114	Methanosarcina mazei LYC		98	0.04	0	3422	2982	G	54260	Ferroglobus		98	0.04	0	3422	2982	G	54260	Ferroglobus
0	0	0	0	0	S1	1434115	Methanosarcina mazei SarPi		98	0.04	0	3422	2982	S	54261	Ferroglobus placidus		98	0.04	0	3422	2982	S	54261	Ferroglobus placidus
0	0	0	0	0	S1	1434116	Methanosarcina mazei TMA		98	0.04	98	3422	2982	S1	589924	Ferroglobus placidus DSM 10642		98	0.04	98	3422	2982	S1	589924	Ferroglobus placidus DSM 10642
0	0	0	0	0	S1	1434117	Methanosarcina mazei WWM610		1449	0.59	36	29989	23084	P1	2290931	Stenosarchaea group		1449	0.59	36	29989	23084	P1	2290931	Stenosarchaea group
1	0	0	9	9	S	2214	Methanosarcina acetivorans		926	0.38	41	16482	12482	C	224756	Methanomicrobia		926	0.38	41	16482	12482	C	224756	Methanomicrobia
1	0	1	9	9	S1	188937	Methanosarcina acetivorans C2A		395	0.16	0	6588	5124	O	94695	Methanosarcinales		395	0.16	0	6588	5124	O	94695	Methanosarcinales
1	0	0	63	49	G1	2644672	unclassified Methanosarcina		395	0.16	57	6588	5124	F	2206	Methanosarcinaceae		395	0.16	57	6588	5124	F	2206	Methanosarcinaceae
1	0	1	6	3	S	1434103	Methanosarcina sp. WWM596		149	0.06	60	2416	1894	G	2207	Methanosarcina		149	0.06	60	2416	1894	G	2207	Methanosarcina
0	0	0	12	12	S	1434099	Methanosarcina sp. Kolksee		30	0.01	3	320	239	G1	2644672	unclassified Methanosarcina		30	0.01	3	320	239	G1	2644672	unclassified Methanosarcina
0	0	0	27	22	S	1434100	Methanosarcina sp. MTP4		19	0.01	19	175	134	S	1434100	Methanosarcina sp. MTP4		19	0.01	19	175	134	S	1434100	Methanosarcina sp. MTP4
0	0	0	0	0	S	1434102	Methanosarcina sp. WH1		7	0	7	42	23	S	1434099	Methanosarcina sp. Kolksee		7	0	7	42	23	S	1434099	Methanosarcina sp. Kolksee
0	0	0	15	10	S	2210	Methanosarcina thermophila		1	0	1	4	4	S	1434102	Methanosarcina sp. WH1		1	0	1	4	4	S	1434102	Methanosarcina sp. WH1
0	0	0	0	0	S1	523844	Methanosarcina thermophila TM-1		0	0	0	21	14	S	1434103	Methanosarcina sp. WWM596		0	0	0	21	14	S	1434103	Methanosarcina sp. WWM596
0	0	0	3	1	S1	1434121	Methanosarcina thermophila CHTI-55		17	0.01	5	335	251	S	2208	Methanosarcina barkeri		17	0.01	5	335	251	S	2208	Methanosarcina barkeri
0	0	0	4	4	S	2215	Methanosarcina vacuolata		6	0	6	98	73	S1	1434109	Methanosarcina barkeri str. Wiesmoor		6	0	6	98	73	S1	1434109	Methanosarcina barkeri str. Wiesmoor
0	0	0	4	4	S1	1434123	Methanosarcina vacuolata Z-761		3	0	3	27	8	S1	796385	Methanosarcina barkeri CM1		3	0	3	27	8	S1	796385	Methanosarcina barkeri CM1
0	0	0	25	21	S	38027	Methanosarcina siciliae		2	0	2	86	78	S1	1434107	Methanosarcina barkeri 3		2	0	2	86	78	S1	1434107	Methanosarcina barkeri 3
0	0	0	8	7	S1	1434118	Methanosarcina siciliae C2J		1	0	1	19	12	S1	1434108	Methanosarcina barkeri MS		1	0	1	19	12	S1	1434108	Methanosarcina barkeri MS
0	0	0	4	3	S1	1434119	Methanosarcina siciliae HI350		0	0	0	10	10	S1	1434106	Methanosarcina barkeri 227		0	0	0	10	10	S1	1434106	Methanosarcina barkeri 227
0	0	0	2	2	S1	1434120	Methanosarcina siciliae T4/M		13	0.01	10	207	161	S	2209	Methanosarcina mazei		13	0.01	10	207	161	S	2209	Methanosarcina mazei
0	0	0	11	10	S	170861	Methanosarcina lacustris		3	0	3	27	15	S1	1434113	Methanosarcina mazei C16		3	0	3	27	15	S1	1434113	Methanosarcina mazei C16
0	0	0	11	10	S1	1434111	Methanosarcina lacustris Z-7289		0	0	0	0	0	S1	192952	Methanosarcina mazei Go1		0	0	0	0	0	S1	192952	Methanosarcina mazei Go1
0	0	0	11	11	S	418008	Methanosarcina horonobensis		0	0	0	13	7	S1	213585	Methanosarcina mazei S-6		0	0	0	13	7	S1	213585	Methanosarcina mazei S-6
0	0	0	11	11	S1	1434110	Methanosarcina horonobensis HB-1 = JCM 15518		0	0	0	2	2	S1	1236903	Methanosarcina mazei Tuc01		0	0	0	2	2	S1	1236903	Methanosarcina mazei Tuc01
0	0	0	4	4	S	1715806	Methanosarcina flavescens		0	0	0	7	6	S1	1434114	Methanosarcina mazei LYC		0	0	0	7	6	S1	1434114	Methanosarcina mazei LYC
8	0.01	3	146	127	G	2220	Methanolobus		0	0	0	10	8	S1	1434115	Methanosarcina mazei SarPi		0	0	0	10	8	S1	1434115	Methanosarcina mazei SarPi
3	0	0	52	43	G1	218299	environmental samples		0	0	0	0	0	S1	1434116	Methanosarcina mazei TMA		0	0	0	0	0	S1	1434116	Methanosarcina mazei TMA
3	0	3	52	43	S	218300	uncultured Methanolobus sp.		0	0	0	13	10	S1	1434117	Methanosarcina mazei WWM610		0	0	0	13	10	S1	1434117	Methanosarcina mazei WWM610
2	0	0	27	24	G1	2629569	unclassified Methanolobus		7	0	0	99	87	S	418008	Methanosarcina horonobensis		7	0	0	99	87	S	418008	Methanosarcina horonobensis
1	0	1	14	12	S	3125784	Methanolobus sp. WCC4		7	0	7	99	87	S1	1434110	Methanosarcina horonobensis HB-1 = JCM 15518		7	0	7	99	87	S1	1434110	Methanosarcina horonobensis HB-1 = JCM 15518
1	0	1	11	11	S	3136295	Methanolobus sp. ZRKC5		6	0	4	78	65	S	2210	Methanosarcina thermophila		6	0	4	78	65	S	2210	Methanosarcina thermophila
0	0	0	19	16	S	536044	Methanolobus zinderi		2	0	2	5	3	S1	1434121	Methanosarcina thermophila CHTI-55		2	0	2	5	3	S1	1434121	Methanosarcina thermophila CHTI-55
0	0	0	9	8	S	3072977	Methanolobus mangrovi		0	0	0	3	2	S1	523844	Methanosarcina thermophila TM-1		0	0	0	3	2	S1	523844	Methanosarcina thermophila TM-1
0	0	0	7	7	S	3072978	Methanolobus sediminis		5	0	0	90	72	S	170861	Methanosarcina lacustris		5	0	0	90	72	S	170861	Methanosarcina lacustris
7	0.01	1	126	57	G	101191	Methanomethylovorans		5	0	5	90	72	S1	1434111	Methanosarcina lacustris Z-7289		5	0	5	90	72	S1	1434111	Methanosarcina lacustris Z-7289
4	0	0	29	23	S	101192	Methanomethylovorans hollandica		4	0	3	166	131	S	38027	Methanosarcina siciliae		4	0	3	166	131	S	38027	Methanosarcina siciliae
4	0	4	29	23	S1	867904	Methanomethylovorans hollandica DSM 15978		1	0	1	16	14	S1	1434120	Methanosarcina siciliae T4/M		1	0	1	16	14	S1	1434120	Methanosarcina siciliae T4/M
2	0	0	55	27	G1	183758	environmental samples		0	0	0	37	26	S1	1434118	Methanosarcina siciliae C2J		0	0	0	37	26	S1	1434118	Methanosarcina siciliae C2J
2	0	2	55	27	S	183759	uncultured Methanomethylovorans sp.		0	0	0	25	20	S1	1434119	Methanosarcina siciliae HI350		0	0	0	25	20	S1	1434119	Methanosarcina siciliae HI350
6	0.01	2	45	36	G	2175	Methanohalophilus		4	0	4	56	49	S	1715806	Methanosarcina flavescens		4	0	4	56	49	S	1715806	Methanosarcina flavescens
2	0	0	14	10	S	2176	Methanohalophilus mahii		3	0	0	64	57	S	2214	Methanosarcina acetivorans		3	0	0	64	57	S	2214	Methanosarcina acetivorans
2	0	2	14	10	S1	547558	Methanohalophilus mahii DSM 5219		3	0	3	64	57	S1	188937	Methanosarcina acetivorans C2A		3	0	3	64	57	S1	188937	Methanosarcina acetivorans C2A
2	0	2	4	2	S	2177	Methanohalophilus halophilus		0	0	0	24	21	S	2215	Methanosarcina vacuolata		0	0	0	24	21	S	2215	Methanosarcina vacuolata
0	0	0	9	9	S	39664	Methanohalophilus portucalensis		0	0	0	24	21	S1	1434123	Methanosarcina vacuolata Z-761		0	0	0	24	21	S1	1434123	Methanosarcina vacuolata Z-761
3	0	1	80	58	G	2225	Methanococcoides		76	0.03	24	1089	849	G	2220	Methanolobus		76	0.03	24	1089	849	G	2220	Methanolobus
1	0	0	36	22	S	2226	Methanococcoides methylutens		22	0.01	0	294	231	G1	218299	environmental samples		22	0.01	0	294	231	G1	218299	environmental samples
1	0	1	36	22	S1	1434104	Methanococcoides methylutens MM1		22	0.01	22	294	231	S	218300	uncultured Methanolobus sp.		22	0.01	22	294	231	S	218300	uncultured Methanolobus sp.
1	0	0	23	20	S	29291	Methanococcoides burtonii		14	0.01	1	229	183	G1	2629569	unclassified Methanolobus		14	0.01	1	229	183	G1	2629569	unclassified Methanolobus
1	0	1	23	20	S1	259564	Methanococcoides burtonii DSM 6242		8	0	8	125	101	S	3125784	Methanolobus sp. WCC4		8	0	8	125	101	S	3125784	Methanolobus sp. WCC4
0	0	0	15	10	S	2822137	Methanococcoides orientis		5	0	5	99	77	S	3136295	Methanolobus sp. ZRKC5		5	0	5	99	77	S	3136295	Methanolobus sp. ZRKC5
3	0	0	32	30	G	3136068	Methanolapillus		11	0	11	162	123	S	536044	Methanolobus zinderi		11	0	11	162	123	S	536044	Methanolobus zinderi
2	0	2	14	13	S	3028296	Methanolapillus millepedarum		5	0	5	55	48	S	3072978	Methanolobus sediminis		5	0	5	55	48	S	3072978	Methanolobus sediminis
1	0	1	13	12	S	3028298	Methanolapillus ohkumae		0	0	0	38	37	S	3072977	Methanolobus mangrovi		0	0	0	38	37	S	3072977	Methanolobus mangrovi
2	0	0	29	28	G	2321	Methanohalobium		34	0.01	6	466	330	G	101191	Methanomethylovorans		34	0.01	6	466	330	G	101191	Methanomethylovorans
2	0	0	29	28	S	2322	Methanohalobium evestigatum		20	0.01	0	204	134	G1	183758	environmental samples		20	0.01	0	204	134	G1	183758	environmental samples
2	0	2	29	28	S1	644295	Methanohalobium evestigatum Z-7303		20	0.01	20	204	134	S	183759	uncultured Methanomethylovorans sp.		20	0.01	20	204	134	S	183759	uncultured Methanomethylovorans sp.
2	0	0	22	16	G	196136	Methanosalsum		8	0	0	157	123	S	101192	Methanomethylovorans hollandica		8	0	0	157	123	S	101192	Methanomethylovorans hollandica
2	0	0	22	16	S	39669	Methanosalsum zhilinae		8	0	8	157	123	S1	867904	Methanomethylovorans hollandica DSM 15978		8	0	8	157	123	S1	867904	Methanomethylovorans hollandica DSM 15978
2	0	2	22	16	S1	679901	Methanosalsum zhilinae DSM 4017		27	0.01	5	407	339	G	2225	Methanococcoides		27	0.01	5	407	339	G	2225	Methanococcoides
0	0	0	27	20	G	91559	Methanimicrococcus		11	0	0	117	95	S	2226	Methanococcoides methylutens		11	0	0	117	95	S	2226	Methanococcoides methylutens
0	0	0	12	9	S	3028294	Methanimicrococcus stummii		11	0	11	117	95	S1	1434104	Methanococcoides methylutens MM1		11	0	11	117	95	S1	1434104	Methanococcoides methylutens MM1
0	0	0	14	10	S	3028295	Methanimicrococcus hongohii		8	0	0	112	97	S	29291	Methanococcoides burtonii		8	0	0	112	97	S	29291	Methanococcoides burtonii
46	0.05	1	703	534	O	2191	Methanomicrobiales		8	0	8	112	97	S1	259564	Methanococcoides burtonii DSM 6242		8	0	8	112	97	S1	259564	Methanococcoides burtonii DSM 6242
21	0.02	2	341	263	F	2194	Methanomicrobiaceae		3	0	3	79	70	S	2822137	Methanococcoides orientis		3	0	3	79	70	S	2822137	Methanococcoides orientis
8	0.01	1	80	67	G	2314	Methanoplanus		12	0	9	312	265	G	2175	Methanohalophilus		12	0	9	312	265	G	2175	Methanohalophilus
4	0	0	26	20	G1	2609416	unclassified Methanoplanus		1	0	0	58	52	S	2176	Methanohalophilus mahii		1	0	0	58	52	S	2176	Methanohalophilus mahii
4	0	4	26	20	S	2609417	Methanoplanus sp. FWC-SCC4		1	0	1	58	52	S1	547558	Methanohalophilus mahii DSM 5219		1	0	1	58	52	S1	547558	Methanohalophilus mahii DSM 5219
3	0	3	30	25	S	33865	Methanoplanus endosymbiosus		1	0	1	48	38	S	2177	Methanohalophilus halophilus		1	0	1	48	38	S	2177	Methanohalophilus halophilus
0	0	0	12	12	S	2315	Methanoplanus limicola		1	0	1	52	47	S	39664	Methanohalophilus portucalensis		1	0	1	52	47	S	39664	Methanohalophilus portucalensis
0	0	0	12	12	S1	937775	Methanoplanus limicola DSM 2279		12	0	0	257	213	G	2321	Methanohalobium		12	0	0	257	213	G	2321	Methanohalobium
5	0.01	1	65	50	G	81416	Methanofollis		12	0	0	257	213	S	2322	Methanohalobium evestigatum		12	0	0	257	213	S	2322	Methanohalobium evestigatum
3	0	3	17	10	S	126734	Methanofollis aquaemaris		12	0	12	257	213	S1	644295	Methanohalobium evestigatum Z-7303		12	0	12	257	213	S1	644295	Methanohalobium evestigatum Z-7303
1	0	0	25	22	S	2201	Methanofollis liminatans		11	0	0	212	165	G	196136	Methanosalsum		11	0	0	212	165	G	196136	Methanosalsum
1	0	1	25	22	S1	28892	Methanofollis liminatans DSM 4140		11	0	0	212	165	S	39669	Methanosalsum zhilinae		11	0	0	212	165	S	39669	Methanosalsum zhilinae
0	0	0	6	6	S	299308	Methanofollis formosanus		11	0	11	212	165	S1	679901	Methanosalsum zhilinae DSM 4017		11	0	11	212	165	S1	679901	Methanosalsum zhilinae DSM 4017
2	0	0	37	18	G	2204	Methanomicrobium		9	0	3	200	165	G	91559	Methanimicrococcus		9	0	3	200	165	G	91559	Methanimicrococcus
2	0	2	37	18	S	487686	Methanomicrobium antiquum		5	0	5	68	57	S	3028294	Methanimicrococcus stummii		5	0	5	68	57	S	3028294	Methanimicrococcus stummii
2	0	2	69	63	G	45989	Methanoculleus		1	0	1	66	58	S	3028295	Methanimicrococcus hongohii		1	0	1	66	58	S	3028295	Methanimicrococcus hongohii
0	0	0	0	0	S	2198	Methanoculleus marisnigri		8	0	3	173	145	G	3136068	Methanolapillus		8	0	3	173	145	G	3136068	Methanolapillus
0	0	0	0	0	S1	368407	Methanoculleus marisnigri JR1		3	0	3	66	57	S	3028298	Methanolapillus ohkumae		3	0	3	66	57	S	3028298	Methanolapillus ohkumae
0	0	0	17	14	S	83986	Methanoculleus bourgensis		2	0	2	62	55	S	3028296	Methanolapillus millepedarum		2	0	2	62	55	S	3028296	Methanolapillus millepedarum
0	0	0	1	1	S1	1201294	Methanoculleus bourgensis MS2		327	0.13	24	5739	4325	O	2191	Methanomicrobiales		327	0.13	24	5739	4325	O	2191	Methanomicrobiales
0	0	0	7	7	S	118126	Methanoculleus chikugoensis		146	0.06	11	2757	2077	F	2194	Methanomicrobiaceae		146	0.06	11	2757	2077	F	2194	Methanomicrobiaceae
0	0	0	0	0	S	204050	Methanoculleus submarinus		46	0.02	16	882	656	G	45989	Methanoculleus		46	0.02	16	882	656	G	45989	Methanoculleus
0	0	0	17	16	S	394967	Methanoculleus receptaculi		13	0.01	12	264	179	S	83986	Methanoculleus bourgensis		13	0.01	12	264	179	S	83986	Methanoculleus bourgensis
1	0	0	22	19	G	2195	Methanogenium		1	0	1	44	38	S1	1201294	Methanoculleus bourgensis MS2		1	0	1	44	38	S1	1201294	Methanoculleus bourgensis MS2
1	0	1	10	9	S	2199	Methanogenium organophilum		12	0	12	192	132	S	394967	Methanoculleus receptaculi		12	0	12	192	132	S	394967	Methanoculleus receptaculi
0	0	0	7	6	G1	2638694	unclassified Methanogenium		5	0	5	101	82	S	118126	Methanoculleus chikugoensis		5	0	5	101	82	S	118126	Methanoculleus chikugoensis
0	0	0	7	6	S	1789226	Methanogenium sp. S4BF		0	0	0	0	0	S	2198	Methanoculleus marisnigri		0	0	0	0	0	S	2198	Methanoculleus marisnigri
1	0	0	32	16	G	230355	Methanolacinia		0	0	0	0	0	S1	368407	Methanoculleus marisnigri JR1		0	0	0	0	0	S1	368407	Methanoculleus marisnigri JR1
1	0	0	32	16	S	54120	Methanolacinia petrolearia		0	0	0	0	0	S	204050	Methanoculleus submarinus		0	0	0	0	0	S	204050	Methanoculleus submarinus
1	0	1	32	16	S1	679926	Methanolacinia petrolearia DSM 11571		34	0.01	6	541	382	G	81416	Methanofollis		34	0.01	6	541	382	G	81416	Methanofollis
12	0.01	0	153	95	F	196137	Methanospirillaceae		13	0.01	13	142	91	S	299308	Methanofollis formosanus		13	0.01	13	142	91	S	299308	Methanofollis formosanus
12	0.01	0	153	95	G	2202	Methanospirillum		9	0	0	158	126	S	2201	Methanofollis liminatans		9	0	0	158	126	S	2201	Methanofollis liminatans
7	0.01	7	54	24	S	2203	Methanospirillum hungatei		9	0	9	158	126	S1	28892	Methanofollis liminatans DSM 4140		9	0	9	158	126	S1	28892	Methanofollis liminatans DSM 4140
0	0	0	13	12	S1	323259	Methanospirillum hungatei JF-1		6	0	6	94	62	S	126734	Methanofollis aquaemaris		6	0	6	94	62	S	126734	Methanofollis aquaemaris
5	0.01	0	59	34	G1	262502	environmental samples		25	0.01	3	492	381	G	2314	Methanoplanus		25	0.01	3	492	381	G	2314	Methanoplanus
5	0.01	5	59	34	S	262503	uncultured Methanospirillum sp.		9	0	0	139	123	G1	2609416	unclassified Methanoplanus		9	0	0	139	123	G1	2609416	unclassified Methanoplanus
0	0	0	3	3	G1	2618161	unclassified Methanospirillum		9	0	9	139	123	S	2609417	Methanoplanus sp. FWC-SCC4		9	0	9	139	123	S	2609417	Methanoplanus sp. FWC-SCC4
0	0	0	3	3	S	2834276	Methanospirillum sp. J.3.6.1-F.2.7.3		8	0	8	161	105	S	33865	Methanoplanus endosymbiosus		8	0	8	161	105	S	33865	Methanoplanus endosymbiosus
11	0.01	0	159	127	F	1198451	Methanoregulaceae		5	0	0	107	85	S	2315	Methanoplanus limicola		5	0	0	107	85	S	2315	Methanoplanus limicola
6	0.01	0	34	29	G	475087	Methanosphaerula		5	0	5	107	85	S1	937775	Methanoplanus limicola DSM 2279		5	0	5	107	85	S1	937775	Methanoplanus limicola DSM 2279
6	0.01	0	34	29	S	475088	Methanosphaerula palustris		17	0.01	5	275	224	G	2195	Methanogenium		17	0.01	5	275	224	G	2195	Methanogenium
6	0.01	6	34	29	S1	521011	Methanosphaerula palustris E1-9c		8	0	8	112	90	S	2199	Methanogenium organophilum		8	0	8	112	90	S	2199	Methanogenium organophilum
5	0.01	0	123	96	G	395331	Methanoregula		4	0	0	82	70	G1	2638694	unclassified Methanogenium		4	0	0	82	70	G1	2638694	unclassified Methanogenium
2	0	0	20	20	S	358766	Methanoregula boonei		4	0	4	82	70	S	1789226	Methanogenium sp. S4BF		4	0	4	82	70	S	1789226	Methanogenium sp. S4BF
2	0	2	20	20	S1	456442	Methanoregula boonei 6A8		7	0	0	189	131	G	230355	Methanolacinia		7	0	0	189	131	G	230355	Methanolacinia
2	0	0	83	58	G1	511148	environmental samples		7	0	0	189	131	S	54120	Methanolacinia petrolearia		7	0	0	189	131	S	54120	Methanolacinia petrolearia
2	0	2	83	58	S	1005933	uncultured Methanoregula sp.		7	0	7	189	131	S1	679926	Methanolacinia petrolearia DSM 11571		7	0	7	189	131	S1	679926	Methanolacinia petrolearia DSM 11571
1	0	0	13	12	S	882104	Methanoregula formicica		6	0	0	121	102	G	2204	Methanomicrobium		6	0	0	121	102	G	2204	Methanomicrobium
1	0	1	13	12	S1	593750	Methanoregula formicica SMSP		6	0	6	121	102	S	487686	Methanomicrobium antiquum		6	0	6	121	102	S	487686	Methanomicrobium antiquum
1	0	0	13	13	F	88404	Methanocorpusculaceae		96	0.04	3	1381	1030	F	1198451	Methanoregulaceae		96	0.04	3	1381	1030	F	1198451	Methanoregulaceae
1	0	0	13	13	G	2192	Methanocorpusculum		82	0.03	16	1119	823	G	395331	Methanoregula		82	0.03	16	1119	823	G	395331	Methanoregula
1	0	0	4	4	G1	176308	environmental samples		30	0.01	0	530	417	G1	511148	environmental samples		30	0.01	0	530	417	G1	511148	environmental samples
1	0	1	4	4	S	176309	uncultured Methanocorpusculum sp.		30	0.01	30	530	417	S	1005933	uncultured Methanoregula sp.		30	0.01	30	530	417	S	1005933	uncultured Methanoregula sp.
0	0	0	2	2	S	83984	Methanocorpusculum labreanum		22	0.01	0	229	151	S	358766	Methanoregula boonei		22	0.01	0	229	151	S	358766	Methanoregula boonei
0	0	0	2	2	S1	410358	Methanocorpusculum labreanum Z		22	0.01	22	229	151	S1	456442	Methanoregula boonei 6A8		22	0.01	22	229	151	S1	456442	Methanoregula boonei 6A8
9	0.01	0	162	113	O	2905377	Methanotrichales		14	0.01	0	151	119	S	882104	Methanoregula formicica		14	0.01	0	151	119	S	882104	Methanoregula formicica
9	0.01	0	162	113	F	143067	Methanotrichaceae		14	0.01	14	151	119	S1	593750	Methanoregula formicica SMSP		14	0.01	14	151	119	S1	593750	Methanoregula formicica SMSP
9	0.01	3	162	113	G	2222	Methanothrix		11	0	0	217	171	G	475087	Methanosphaerula		11	0	0	217	171	G	475087	Methanosphaerula
3	0	0	28	26	S	2224	Methanothrix thermoacetophila		11	0	0	217	171	S	475088	Methanosphaerula palustris		11	0	0	217	171	S	475088	Methanosphaerula palustris
3	0	3	28	26	S1	349307	Methanothrix thermoacetophila PT		11	0	11	217	171	S1	521011	Methanosphaerula palustris E1-9c		11	0	11	217	171	S1	521011	Methanosphaerula palustris E1-9c
2	0	0	44	35	S	301375	Methanothrix harundinacea		52	0.02	0	884	683	F	196137	Methanospirillaceae		52	0.02	0	884	683	F	196137	Methanospirillaceae
2	0	2	44	35	S1	1110509	Methanothrix harundinacea 6Ac		52	0.02	15	884	683	G	2202	Methanospirillum		52	0.02	15	884	683	G	2202	Methanospirillum
1	0	0	17	14	S	2223	Methanothrix soehngenii		22	0.01	0	332	260	G1	262502	environmental samples		22	0.01	0	332	260	G1	262502	environmental samples
1	0	1	17	14	S1	990316	Methanothrix soehngenii GP6		22	0.01	22	332	260	S	262503	uncultured Methanospirillum sp.		22	0.01	22	332	260	S	262503	uncultured Methanospirillum sp.
0	0	0	1	1	G1	2620051	unclassified Methanothrix		14	0.01	5	202	153	S	2203	Methanospirillum hungatei		14	0.01	5	202	153	S	2203	Methanospirillum hungatei
0	0	0	1	1	S	90426	Methanothrix sp.		9	0	9	134	113	S1	323259	Methanospirillum hungatei JF-1		9	0	9	134	113	S1	323259	Methanospirillum hungatei JF-1
7	0.01	0	126	100	O	570264	Methanocellales		1	0	0	45	39	G1	2618161	unclassified Methanospirillum		1	0	0	45	39	G1	2618161	unclassified Methanospirillum
7	0.01	0	126	100	F	570265	Methanocellaceae		1	0	1	45	39	S	2834276	Methanospirillum sp. J.3.6.1-F.2.7.3		1	0	1	45	39	S	2834276	Methanospirillum sp. J.3.6.1-F.2.7.3
7	0.01	1	126	100	G	570266	Methanocella		9	0	0	166	121	F	88404	Methanocorpusculaceae		9	0	0	166	121	F	88404	Methanocorpusculaceae
4	0	0	21	18	S	1175444	Methanocella conradii		9	0	4	166	121	G	2192	Methanocorpusculum		9	0	4	166	121	G	2192	Methanocorpusculum
4	0	4	21	18	S1	1041930	Methanocella conradii HZ254		4	0	0	33	28	S	83984	Methanocorpusculum labreanum		4	0	0	33	28	S	83984	Methanocorpusculum labreanum
1	0	0	51	36	S	570267	Methanocella paludicola		4	0	4	33	28	S1	410358	Methanocorpusculum labreanum Z		4	0	4	33	28	S1	410358	Methanocorpusculum labreanum Z
1	0	1	51	36	S1	304371	Methanocella paludicola SANAE		1	0	0	28	21	G1	176308	environmental samples		1	0	0	28	21	G1	176308	environmental samples
1	0	0	39	32	S	1175445	Methanocella arvoryzae		1	0	1	28	21	S	176309	uncultured Methanocorpusculum sp.		1	0	1	28	21	S	176309	uncultured Methanocorpusculum sp.
1	0	1	39	32	S1	351160	Methanocella arvoryzae MRE50		90	0.04	0	1683	1236	O	2905377	Methanotrichales		90	0.04	0	1683	1236	O	2905377	Methanotrichales
77	0.08	0	2444	1849	C	183963	Halobacteria		90	0.04	0	1683	1236	F	143067	Methanotrichaceae		90	0.04	0	1683	1236	F	143067	Methanotrichaceae
77	0.08	15	2444	1849	O	2235	Halobacteriales		90	0.04	25	1683	1236	G	2222	Methanothrix		90	0.04	25	1683	1236	G	2222	Methanothrix
17	0.02	0	452	339	F	1644061	Natrialbaceae		38	0.02	0	542	391	S	2224	Methanothrix thermoacetophila		38	0.02	0	542	391	S	2224	Methanothrix thermoacetophila
5	0.01	0	23	15	G	134813	Natronorubrum		38	0.02	38	542	391	S1	349307	Methanothrix thermoacetophila PT		38	0.02	38	542	391	S1	349307	Methanothrix thermoacetophila PT
4	0	4	11	3	S	348826	Natronorubrum aibiense		23	0.01	0	518	361	S	301375	Methanothrix harundinacea		23	0.01	0	518	361	S	301375	Methanothrix harundinacea
1	0	1	5	5	S	588898	Natronorubrum daqingense		23	0.01	23	518	361	S1	1110509	Methanothrix harundinacea 6Ac		23	0.01	23	518	361	S1	1110509	Methanothrix harundinacea 6Ac
0	0	0	5	5	S	61858	Natronorubrum bangense		3	0	0	75	56	S	2223	Methanothrix soehngenii		3	0	0	75	56	S	2223	Methanothrix soehngenii
2	0	0	34	20	G	29287	Natronococcus		3	0	3	75	56	S1	990316	Methanothrix soehngenii GP6		3	0	3	75	56	S1	990316	Methanothrix soehngenii GP6
2	0	0	22	12	G1	2623058	unclassified Natronococcus		1	0	0	15	14	G1	2620051	unclassified Methanothrix		1	0	0	15	14	G1	2620051	unclassified Methanothrix
1	0	1	8	6	S	2951804	Natronococcus sp. CG52		1	0	1	15	14	S	90426	Methanothrix sp.		1	0	1	15	14	S	90426	Methanothrix sp.
1	0	1	11	4	S	3068275	Natronococcus sp. AD-5		73	0.03	0	1365	1032	O	570264	Methanocellales		73	0.03	0	1365	1032	O	570264	Methanocellales
0	0	0	11	7	S	29288	Natronococcus occultus		73	0.03	0	1365	1032	F	570265	Methanocellaceae		73	0.03	0	1365	1032	F	570265	Methanocellaceae
0	0	0	11	7	S1	694430	Natronococcus occultus SP4		73	0.03	13	1365	1032	G	570266	Methanocella		73	0.03	13	1365	1032	G	570266	Methanocella
2	0	0	90	66	G	88723	Natrinema		33	0.01	0	368	276	S	570267	Methanocella paludicola		33	0.01	0	368	276	S	570267	Methanocella paludicola
1	0	1	26	10	S	1699371	Natrinema halophilum		33	0.01	33	368	276	S1	304371	Methanocella paludicola SANAE		33	0.01	33	368	276	S1	304371	Methanocella paludicola SANAE
1	0	1	1	1	S	2961598	Natrinema marinum		16	0.01	0	391	300	S	1175445	Methanocella arvoryzae		16	0.01	0	391	300	S	1175445	Methanocella arvoryzae
0	0	0	2	2	S	69525	Natrinema pellirubrum		16	0.01	16	391	300	S1	351160	Methanocella arvoryzae MRE50		16	0.01	16	391	300	S1	351160	Methanocella arvoryzae MRE50
0	0	0	2	2	S1	797303	Natrinema pellirubrum DSM 15624		11	0	0	351	268	S	1175444	Methanocella conradii		11	0	0	351	268	S	1175444	Methanocella conradii
0	0	0	3	3	S	69527	Natrinema pallidum		11	0	11	351	268	S1	1041930	Methanocella conradii HZ254		11	0	11	351	268	S1	1041930	Methanocella conradii HZ254
0	0	0	7	5	S	88724	Natrinema versiforme		487	0.2	0	12964	10225	C	183963	Halobacteria		487	0.2	0	12964	10225	C	183963	Halobacteria
0	0	0	1	1	S	121872	Natrinema thermotolerans		487	0.2	103	12964	10225	O	2235	Halobacteriales		487	0.2	103	12964	10225	O	2235	Halobacteriales
0	0	0	3	2	S	370324	Natrinema longum		133	0.05	12	3038	2426	F	1963268	Haloarculaceae		133	0.05	12	3038	2426	F	1963268	Haloarculaceae
0	0	0	6	6	S	1710539	Natrinema zhouii		20	0.01	0	248	189	G	871740	Halomarina		20	0.01	0	248	189	G	871740	Halomarina
0	0	0	16	13	G1	2622230	unclassified Natrinema		20	0.01	13	248	189	G1	2646516	unclassified Halomarina		20	0.01	13	248	189	G1	2646516	unclassified Halomarina
0	0	0	5	4	S	406552	Natrinema sp. J7-2		6	0	6	83	62	S	2961595	Halomarina sp. BCD28		6	0	6	83	62	S	2961595	Halomarina sp. BCD28
0	0	0	8	6	S	2871694	Natrinema sp. SYSU A 869		1	0	1	58	49	S	3033386	Halomarina sp. PSR21		1	0	1	58	49	S	3033386	Halomarina sp. PSR21
0	0	0	3	3	S	2878680	Natrinema sp. DC36		0	0	0	63	49	S	2961599	Halomarina sp. BND7		0	0	0	63	49	S	2961599	Halomarina sp. BND7
0	0	0	5	4	S	2878535	Natrinema salinisoli		15	0.01	4	324	255	G	2237	Haloarcula		15	0.01	4	324	255	G	2237	Haloarcula
0	0	0	5	5	S	2961570	Natrinema caseinilyticum		4	0	4	20	19	S	3032584	Haloarcula halophila		4	0	4	20	19	S	3032584	Haloarcula halophila
0	0	0	5	5	S	2961571	Natrinema gelatinilyticum		3	0	3	38	30	S	3032579	Haloarcula litorea		3	0	3	38	30	S	3032579	Haloarcula litorea
2	0	0	17	16	G	3065677	Natrononativus		2	0	2	35	30	S	3033390	Haloarcula ordinaria		2	0	2	35	30	S	3033390	Haloarcula ordinaria
2	0	2	17	16	S	2963434	Natrononativus amylolyticus		1	0	1	7	6	S	51589	Haloarcula hispanica		1	0	1	7	6	S	51589	Haloarcula hispanica
2	0	0	8	7	G	353799	Halostagnicola		0	0	0	0	0	S1	634497	Haloarcula hispanica ATCC 33960		0	0	0	0	0	S1	634497	Haloarcula hispanica ATCC 33960
2	0	0	8	7	S	353800	Halostagnicola larsenii		0	0	0	0	0	S1	1417673	Haloarcula hispanica N601		0	0	0	0	0	S1	1417673	Haloarcula hispanica N601
2	0	2	8	7	S1	797299	Halostagnicola larsenii XH-48		1	0	1	63	31	S	3033389	Haloarcula pelagica		1	0	1	63	31	S	3033389	Haloarcula pelagica
2	0	0	47	26	G	332951	Halovivax		0	0	0	5	5	S	2238	Haloarcula marismortui		0	0	0	5	5	S	2238	Haloarcula marismortui
1	0	0	10	9	S	387341	Halovivax ruber		0	0	0	5	5	S1	272569	Haloarcula marismortui ATCC 43049		0	0	0	5	5	S1	272569	Haloarcula marismortui ATCC 43049
1	0	1	10	9	S1	797302	Halovivax ruber XH-70		0	0	0	7	7	S	35742	Haloarcula sinaiiensis		0	0	0	7	7	S	35742	Haloarcula sinaiiensis
1	0	1	11	10	S	1453760	Halovivax limisalsi		0	0	0	7	7	S1	662476	Haloarcula sinaiiensis ATCC 33800		0	0	0	7	7	S1	662476	Haloarcula sinaiiensis ATCC 33800
0	0	0	20	1	S	1487865	Halovivax cerinus		0	0	0	19	16	G1	2624677	unclassified Haloarcula		0	0	0	19	16	G1	2624677	unclassified Haloarcula
0	0	0	4	4	S	2961597	Halovivax gelatinilyticus		0	0	0	3	3	S	1592728	Haloarcula sp. CBA1115		0	0	0	3	3	S	1592728	Haloarcula sp. CBA1115
1	0	0	22	13	G	3125902	Halomontanus		0	0	0	16	13	S	3111776	Haloarcula sp. GH36		0	0	0	16	13	S	3111776	Haloarcula sp. GH36
1	0	1	22	13	S	3034020	Halomontanus rarus		0	0	0	19	18	S	3033388	Haloarcula halobia		0	0	0	19	18	S	3033388	Haloarcula halobia
1	0	0	42	39	G	3076685	Natronosalvus		10	0	1	199	151	G	146825	Halorhabdus		10	0	1	199	151	G	146825	Halorhabdus
1	0	1	10	9	S	2961994	Natronosalvus amylolyticus		4	0	1	74	61	G1	2621901	unclassified Halorhabdus		4	0	1	74	61	G1	2621901	unclassified Halorhabdus
0	0	0	7	7	S	2953746	Natronosalvus halobius		3	0	3	40	33	S	1380432	Halorhabdus sp. CBA1104		3	0	3	40	33	S	1380432	Halorhabdus sp. CBA1104
0	0	0	7	7	S	2953747	Natronosalvus caseinilyticus		0	0	0	1	1	S	2978283	Halorhabdus sp. SVX81		0	0	0	1	1	S	2978283	Halorhabdus sp. SVX81
0	0	0	3	3	S	2953753	Natronosalvus rutilus		0	0	0	4	4	S	2980181	Halorhabdus sp. BNX81		0	0	0	4	4	S	2980181	Halorhabdus sp. BNX81
0	0	0	9	9	S	2953881	Natronosalvus vescus		3	0	0	28	18	S	146826	Halorhabdus utahensis		3	0	0	28	18	S	146826	Halorhabdus utahensis
0	0	0	10	6	G	203193	Halobiforma		3	0	3	28	18	S1	519442	Halorhabdus utahensis DSM 12940		3	0	3	28	18	S1	519442	Halorhabdus utahensis DSM 12940
0	0	0	10	6	S	229731	Halobiforma lacisalsi		2	0	0	30	24	S	430914	Halorhabdus tiamatea		2	0	0	30	24	S	430914	Halorhabdus tiamatea
0	0	0	10	6	S1	358396	Halobiforma lacisalsi AJ5		2	0	2	30	24	S1	1033806	Halorhabdus tiamatea SARL4B		2	0	2	30	24	S1	1033806	Halorhabdus tiamatea SARL4B
0	0	0	5	5	G	387342	Halopiger		10	0	3	147	121	G	203135	Halomicrobium		10	0	3	147	121	G	203135	Halomicrobium
0	0	0	5	5	S	387343	Halopiger xanaduensis		4	0	4	36	28	S	1586233	Halomicrobium urmianum		4	0	4	36	28	S	1586233	Halomicrobium urmianum
0	0	0	5	5	S1	797210	Halopiger xanaduensis SH-6		3	0	3	37	30	S	2878391	Halomicrobium salinisoli		3	0	3	37	30	S	2878391	Halomicrobium salinisoli
0	0	0	11	10	G	1699375	Natribaculum		0	0	0	2	2	S	57705	Halomicrobium mukohataei		0	0	0	2	2	S	57705	Halomicrobium mukohataei
0	0	0	11	10	S	1586232	Natribaculum luteum		0	0	0	0	0	S1	485914	Halomicrobium mukohataei DSM 12286		0	0	0	0	0	S1	485914	Halomicrobium mukohataei DSM 12286
0	0	0	33	24	G	2765402	Natrarchaeobaculum		0	0	0	20	16	G1	2610901	unclassified Halomicrobium		0	0	0	20	16	G1	2610901	unclassified Halomicrobium
0	0	0	12	10	S	745377	Natrarchaeobaculum aegyptiacum		0	0	0	20	16	S	2610902	Halomicrobium sp. LC1Hm		0	0	0	20	16	S	2610902	Halomicrobium sp. LC1Hm
0	0	0	9	8	S	2044521	Natrarchaeobaculum sulfurireducens		0	0	0	0	0	S	2790029	Halomicrobium sp. ZPS1		0	0	0	0	0	S	2790029	Halomicrobium sp. ZPS1
0	0	0	11	5	G1	2765406	unclassified Natrarchaeobaculum		9	0	2	298	235	G	63743	Natronomonas		9	0	2	298	235	G	63743	Natronomonas
0	0	0	11	5	S	3053904	Natrialbaceae archaeon AArc-T1-2		2	0	0	44	32	S	2257	Natronomonas pharaonis		2	0	0	44	32	S	2257	Natronomonas pharaonis
0	0	0	14	12	G	2993618	Halosolutus		2	0	2	44	32	S1	348780	Natronomonas pharaonis DSM 2160		2	0	2	44	32	S1	348780	Natronomonas pharaonis DSM 2160
0	0	0	5	5	S	1552990	Halosolutus halophilus		2	0	2	42	33	S	1046043	Natronomonas gomsonensis		2	0	2	42	33	S	1046043	Natronomonas gomsonensis
0	0	0	6	6	S	2931975	Halosolutus gelatinilyticus		2	0	2	77	48	S	2961939	Natronomonas marina		2	0	2	77	48	S	2961939	Natronomonas marina
0	0	0	13	11	G	3065676	Salinilacihabitans		1	0	1	47	43	S	1710540	Natronomonas salina		1	0	1	47	43	S	1710540	Natronomonas salina
0	0	0	13	11	S	2961596	Salinilacihabitans rarus		0	0	0	28	28	S	416273	Natronomonas moolapensis		0	0	0	28	28	S	416273	Natronomonas moolapensis
0	0	0	28	17	G	121871	Haloterrigena		0	0	0	28	28	S1	268739	Natronomonas moolapensis 8.8.11		0	0	0	28	28	S1	268739	Natronomonas moolapensis 8.8.11
0	0	0	3	2	S	62320	Haloterrigena turkmenica		0	0	0	34	30	S	2747817	Natronomonas halophila		0	0	0	34	30	S	2747817	Natronomonas halophila
0	0	0	3	2	S1	543526	Haloterrigena turkmenica DSM 5511		9	0	0	191	160	G	2907493	Halocatena		9	0	0	191	160	G	2907493	Halocatena
0	0	0	8	8	G1	2631942	unclassified Haloterrigena		6	0	6	118	96	S	2934937	Halocatena marina		6	0	6	118	96	S	2934937	Halocatena marina
0	0	0	8	8	S	3132747	Haloterrigena sp. KLK7		3	0	3	71	62	S	2934340	Halocatena salina		3	0	3	71	62	S	2934340	Halocatena salina
0	0	0	11	2	S	2675099	Haloterrigena salifodinae		7	0	0	189	158	G	171163	Halosimplex		7	0	0	189	158	G	171163	Halosimplex
0	0	0	3	3	S	2816475	Haloterrigena alkaliphila		4	0	4	29	24	S	1198301	Halosimplex litoreum		4	0	4	29	24	S	1198301	Halosimplex litoreum
0	0	0	5	5	G	3065678	Natronobeatus		2	0	2	56	49	S	3026162	Halosimplex aquaticum		2	0	2	56	49	S	3026162	Halosimplex aquaticum
0	0	0	5	5	S	2963433	Natronobeatus ordinarius		1	0	1	40	31	S	869886	Halosimplex pelagicum		1	0	1	40	31	S	869886	Halosimplex pelagicum
0	0	0	11	10	G	63742	Natrialba		0	0	0	34	30	S	869889	Halosimplex rubrum		0	0	0	34	30	S	869889	Halosimplex rubrum
0	0	0	11	10	S	13769	Natrialba magadii		7	0	1	183	149	G	1073987	Halorientalis		7	0	1	183	149	G	1073987	Halorientalis
0	0	0	11	10	S1	547559	Natrialba magadii ATCC 43099		4	0	0	66	52	G1	2648975	unclassified Halorientalis		4	0	0	66	52	G1	2648975	unclassified Halorientalis
0	0	0	8	8	G	2256	Natronobacterium		4	0	4	66	52	S	1932360	Halorientalis sp. IM1011		4	0	4	66	52	S	1932360	Halorientalis sp. IM1011
0	0	0	8	8	S	44930	Natronobacterium gregoryi		1	0	1	61	48	S	2931976	Halorientalis marina		1	0	1	61	48	S	2931976	Halorientalis marina
0	0	0	8	8	S1	797304	Natronobacterium gregoryi SP2		1	0	1	54	47	S	2931977	Halorientalis litorea		1	0	1	54	47	S	2931977	Halorientalis litorea
17	0.02	1	623	444	F	1963268	Haloarculaceae		7	0	0	72	60	G	1377992	Halovenus		7	0	0	72	60	G	1377992	Halovenus
6	0.01	0	40	22	G	203135	Halomicrobium		7	0	7	72	60	S	1510225	Halovenus salina		7	0	7	72	60	S	1510225	Halovenus salina
6	0.01	6	15	6	S	2878391	Halomicrobium salinisoli		7	0	0	139	112	G	2162630	Salinirubellus		7	0	0	139	112	G	2162630	Salinirubellus
0	0	0	0	0	S	57705	Halomicrobium mukohataei		5	0	0	81	66	G1	2627207	unclassified Salinirubellus		5	0	0	81	66	G1	2627207	unclassified Salinirubellus
0	0	0	0	0	S1	485914	Halomicrobium mukohataei DSM 12286		5	0	5	81	66	S	3131999	Salinirubellus sp. SYNS196		5	0	5	81	66	S	3131999	Salinirubellus sp. SYNS196
0	0	0	3	3	S	1586233	Halomicrobium urmianum		2	0	2	57	45	S	1364945	Salinirubellus salinus		2	0	2	57	45	S	1364945	Salinirubellus salinus
0	0	0	5	5	G1	2610901	unclassified Halomicrobium		6	0	0	148	107	G	3056835	Halorarius		6	0	0	148	107	G	3056835	Halorarius
0	0	0	5	5	S	2610902	Halomicrobium sp. LC1Hm		3	0	3	69	48	S	2962671	Halorarius halobius		3	0	3	69	48	S	2962671	Halorarius halobius
0	0	0	0	0	S	2790029	Halomicrobium sp. ZPS1		3	0	3	76	56	S	2962676	Halorarius litoreus		3	0	3	76	56	S	2962676	Halorarius litoreus
2	0	0	33	31	G	871740	Halomarina		4	0	0	160	120	G	2732368	Salinibaculum		4	0	0	160	120	G	2732368	Salinibaculum
2	0	1	33	31	G1	2646516	unclassified Halomarina		4	0	0	160	120	G1	3058902	unclassified Salinibaculum		4	0	0	160	120	G1	3058902	unclassified Salinibaculum
1	0	1	7	7	S	2961595	Halomarina sp. BCD28		2	0	2	61	51	S	3058903	Salinibaculum sp. KK48		2	0	2	61	51	S	3058903	Salinibaculum sp. KK48
0	0	0	8	8	S	2961599	Halomarina sp. BND7		2	0	2	91	63	S	3131993	Salinibaculum sp. SYNS191		2	0	2	91	63	S	3131993	Salinibaculum sp. SYNS191
0	0	0	8	8	S	3033386	Halomarina sp. PSR21		4	0	0	184	158	G	1542963	Halapricum		4	0	0	184	158	G	1542963	Halapricum
2	0	0	52	48	G	1073987	Halorientalis		2	0	2	64	54	S	1457250	Halapricum salinum		2	0	2	64	54	S	1457250	Halapricum salinum
1	0	0	17	14	G1	2648975	unclassified Halorientalis		2	0	2	110	98	S	2841257	Halapricum desulfuricans		2	0	2	110	98	S	2841257	Halapricum desulfuricans
1	0	1	17	14	S	1932360	Halorientalis sp. IM1011		3	0	0	47	40	G	2907507	Halococcoides		3	0	0	47	40	G	2907507	Halococcoides
1	0	1	12	12	S	2931977	Halorientalis litorea		3	0	3	47	40	S	1679096	Halococcoides cellulosivorans		3	0	3	47	40	S	1679096	Halococcoides cellulosivorans
0	0	0	23	22	S	2931976	Halorientalis marina		3	0	0	63	51	G	1427149	Halomicroarcula		3	0	0	63	51	G	1427149	Halomicroarcula
1	0	0	21	16	G	1427149	Halomicroarcula		3	0	3	39	32	S	2961574	Halomicroarcula marina		3	0	3	39	32	S	2961574	Halomicroarcula marina
1	0	1	8	8	S	2961574	Halomicroarcula marina		0	0	0	24	19	G1	2630810	unclassified Halomicroarcula		0	0	0	24	19	G1	2630810	unclassified Halomicroarcula
0	0	0	13	8	G1	2630810	unclassified Halomicroarcula		0	0	0	24	19	S	3033392	Halomicroarcula sp. SYNS111		0	0	0	24	19	S	3033392	Halomicroarcula sp. SYNS111
0	0	0	13	8	S	3033392	Halomicroarcula sp. SYNS111		0	0	0	101	83	G	2806252	Haloglomus		0	0	0	101	83	G	2806252	Haloglomus
1	0	0	52	23	G	3056835	Halorarius		0	0	0	27	22	S	2962672	Haloglomus halophilum		0	0	0	27	22	S	2962672	Haloglomus halophilum
1	0	1	16	12	S	2962676	Halorarius litoreus		0	0	0	11	8	S	2962673	Haloglomus salinum		0	0	0	11	8	S	2962673	Haloglomus salinum
0	0	0	35	10	S	2962671	Halorarius halobius		0	0	0	35	30	S	3034026	Haloglomus litoreum		0	0	0	35	30	S	3034026	Haloglomus litoreum
1	0	0	32	16	G	2732368	Salinibaculum		0	0	0	25	22	G	2841540	Halosegnis		0	0	0	25	22	G	2841540	Halosegnis
1	0	0	32	16	G1	3058902	unclassified Salinibaculum		0	0	0	25	22	S	3034023	Halosegnis marinus		0	0	0	25	22	S	3034023	Halosegnis marinus
1	0	1	23	9	S	3131993	Salinibaculum sp. SYNS191		85	0.03	8	2379	1982	F	1644061	Natrialbaceae		85	0.03	8	2379	1982	F	1644061	Natrialbaceae
0	0	0	9	7	S	3058903	Salinibaculum sp. KK48		18	0.01	2	461	399	G	88723	Natrinema		18	0.01	2	461	399	G	88723	Natrinema
1	0	0	22	16	G	2162630	Salinirubellus		5	0	5	44	37	S	2961571	Natrinema gelatinilyticum		5	0	5	44	37	S	2961571	Natrinema gelatinilyticum
1	0	0	14	10	G1	2627207	unclassified Salinirubellus		3	0	3	23	18	S	69527	Natrinema pallidum		3	0	3	23	18	S	69527	Natrinema pallidum
1	0	1	14	10	S	3131999	Salinirubellus sp. SYNS196		3	0	3	27	23	S	88724	Natrinema versiforme		3	0	3	27	23	S	88724	Natrinema versiforme
0	0	0	8	6	S	1364945	Salinirubellus salinus		2	0	2	28	25	S	2961598	Natrinema marinum		2	0	2	28	25	S	2961598	Natrinema marinum
1	0	0	24	21	G	146825	Halorhabdus		1	0	0	14	13	S	69525	Natrinema pellirubrum		1	0	0	14	13	S	69525	Natrinema pellirubrum
1	0	0	12	10	G1	2621901	unclassified Halorhabdus		1	0	1	14	13	S1	797303	Natrinema pellirubrum DSM 15624		1	0	1	14	13	S1	797303	Natrinema pellirubrum DSM 15624
1	0	1	1	1	S	2980181	Halorhabdus sp. BNX81		1	0	1	38	32	S	1699371	Natrinema halophilum		1	0	1	38	32	S	1699371	Natrinema halophilum
0	0	0	7	6	S	1380432	Halorhabdus sp. CBA1104		1	0	0	72	64	G1	2622230	unclassified Natrinema		1	0	0	72	64	G1	2622230	unclassified Natrinema
0	0	0	0	0	S	2978283	Halorhabdus sp. SVX81		1	0	1	31	26	S	2871694	Natrinema sp. SYSU A 869		1	0	1	31	26	S	2871694	Natrinema sp. SYSU A 869
0	0	0	2	1	S	146826	Halorhabdus utahensis		0	0	0	16	14	S	406552	Natrinema sp. J7-2		0	0	0	16	14	S	406552	Natrinema sp. J7-2
0	0	0	2	1	S1	519442	Halorhabdus utahensis DSM 12940		0	0	0	24	23	S	2878680	Natrinema sp. DC36		0	0	0	24	23	S	2878680	Natrinema sp. DC36
0	0	0	3	3	S	430914	Halorhabdus tiamatea		0	0	0	11	7	S	121872	Natrinema thermotolerans		0	0	0	11	7	S	121872	Natrinema thermotolerans
0	0	0	3	3	S1	1033806	Halorhabdus tiamatea SARL4B		0	0	0	22	18	S	370324	Natrinema longum		0	0	0	22	18	S	370324	Natrinema longum
1	0	0	64	47	G	63743	Natronomonas		0	0	0	33	29	S	1710539	Natrinema zhouii		0	0	0	33	29	S	1710539	Natrinema zhouii
1	0	1	13	8	S	1710540	Natronomonas salina		0	0	0	22	21	S	2878535	Natrinema salinisoli		0	0	0	22	21	S	2878535	Natrinema salinisoli
0	0	0	11	10	S	2257	Natronomonas pharaonis		0	0	0	48	44	S	2961570	Natrinema caseinilyticum		0	0	0	48	44	S	2961570	Natrinema caseinilyticum
0	0	0	11	10	S1	348780	Natronomonas pharaonis DSM 2160		13	0.01	0	174	139	G	29287	Natronococcus		13	0.01	0	174	139	G	29287	Natronococcus
0	0	0	3	3	S	416273	Natronomonas moolapensis		10	0	1	113	86	G1	2623058	unclassified Natronococcus		10	0	1	113	86	G1	2623058	unclassified Natronococcus
0	0	0	3	3	S1	268739	Natronomonas moolapensis 8.8.11		6	0	6	45	35	S	2951804	Natronococcus sp. CG52		6	0	6	45	35	S	2951804	Natronococcus sp. CG52
0	0	0	8	8	S	1046043	Natronomonas gomsonensis		3	0	3	58	42	S	3068275	Natronococcus sp. AD-5		3	0	3	58	42	S	3068275	Natronococcus sp. AD-5
0	0	0	10	7	S	2747817	Natronomonas halophila		3	0	0	57	50	S	29288	Natronococcus occultus		3	0	0	57	50	S	29288	Natronococcus occultus
0	0	0	4	4	S	2961939	Natronomonas marina		3	0	3	57	50	S1	694430	Natronococcus occultus SP4		3	0	3	57	50	S1	694430	Natronococcus occultus SP4
0	0	0	10	8	G	1377992	Halovenus		9	0	3	227	178	G	332951	Halovivax		9	0	3	227	178	G	332951	Halovivax
0	0	0	10	8	S	1510225	Halovenus salina		3	0	3	69	54	S	2961597	Halovivax gelatinilyticus		3	0	3	69	54	S	2961597	Halovivax gelatinilyticus
0	0	0	70	49	G	2237	Haloarcula		2	0	2	39	33	S	1487865	Halovivax cerinus		2	0	2	39	33	S	1487865	Halovivax cerinus
0	0	0	0	0	S	2238	Haloarcula marismortui		1	0	1	55	47	S	1453760	Halovivax limisalsi		1	0	1	55	47	S	1453760	Halovivax limisalsi
0	0	0	0	0	S1	272569	Haloarcula marismortui ATCC 43049		0	0	0	34	30	S	387341	Halovivax ruber		0	0	0	34	30	S	387341	Halovivax ruber
0	0	0	0	0	S	35742	Haloarcula sinaiiensis		0	0	0	34	30	S1	797302	Halovivax ruber XH-70		0	0	0	34	30	S1	797302	Halovivax ruber XH-70
0	0	0	0	0	S1	662476	Haloarcula sinaiiensis ATCC 33800		7	0	1	216	181	G	3076685	Natronosalvus		7	0	1	216	181	G	3076685	Natronosalvus
0	0	0	1	1	S	51589	Haloarcula hispanica		3	0	3	33	28	S	2953747	Natronosalvus caseinilyticus		3	0	3	33	28	S	2953747	Natronosalvus caseinilyticus
0	0	0	0	0	S1	634497	Haloarcula hispanica ATCC 33960		2	0	2	37	33	S	2961994	Natronosalvus amylolyticus		2	0	2	37	33	S	2961994	Natronosalvus amylolyticus
0	0	0	0	0	S1	1417673	Haloarcula hispanica N601		1	0	1	52	46	S	2953881	Natronosalvus vescus		1	0	1	52	46	S	2953881	Natronosalvus vescus
0	0	0	2	1	G1	2624677	unclassified Haloarcula		0	0	0	34	26	S	2953746	Natronosalvus halobius		0	0	0	34	26	S	2953746	Natronosalvus halobius
0	0	0	2	1	S	1592728	Haloarcula sp. CBA1115		0	0	0	23	22	S	2953753	Natronosalvus rutilus		0	0	0	23	22	S	2953753	Natronosalvus rutilus
0	0	0	0	0	S	3111776	Haloarcula sp. GH36		6	0	0	97	83	G	3125902	Halomontanus		6	0	0	97	83	G	3125902	Halomontanus
0	0	0	9	9	S	3032579	Haloarcula litorea		6	0	6	97	83	S	3034020	Halomontanus rarus		6	0	6	97	83	S	3034020	Halomontanus rarus
0	0	0	3	2	S	3032584	Haloarcula halophila		4	0	0	117	95	G	134813	Natronorubrum		4	0	0	117	95	G	134813	Natronorubrum
0	0	0	1	1	S	3033388	Haloarcula halobia		2	0	2	25	22	S	348826	Natronorubrum aibiense		2	0	2	25	22	S	348826	Natronorubrum aibiense
0	0	0	24	12	S	3033389	Haloarcula pelagica		2	0	2	43	32	S	588898	Natronorubrum daqingense		2	0	2	43	32	S	588898	Natronorubrum daqingense
0	0	0	8	7	S	3033390	Haloarcula ordinaria		0	0	0	43	35	S	61858	Natronorubrum bangense		0	0	0	43	35	S	61858	Natronorubrum bangense
0	0	0	29	26	G	1542963	Halapricum		4	0	0	44	42	G	353799	Halostagnicola		4	0	0	44	42	G	353799	Halostagnicola
0	0	0	10	10	S	1457250	Halapricum salinum		4	0	0	44	42	S	353800	Halostagnicola larsenii		4	0	0	44	42	S	353800	Halostagnicola larsenii
0	0	0	16	14	S	2841257	Halapricum desulfuricans		4	0	4	44	42	S1	797299	Halostagnicola larsenii XH-48		4	0	4	44	42	S1	797299	Halostagnicola larsenii XH-48
0	0	0	43	38	G	171163	Halosimplex		4	0	0	128	108	G	2765402	Natrarchaeobaculum		4	0	0	128	108	G	2765402	Natrarchaeobaculum
0	0	0	13	9	S	869886	Halosimplex pelagicum		2	0	0	40	36	G1	2765406	unclassified Natrarchaeobaculum		2	0	0	40	36	G1	2765406	unclassified Natrarchaeobaculum
0	0	0	4	3	S	869889	Halosimplex rubrum		2	0	2	40	36	S	3053904	Natrialbaceae archaeon AArc-T1-2		2	0	2	40	36	S	3053904	Natrialbaceae archaeon AArc-T1-2
0	0	0	9	9	S	1198301	Halosimplex litoreum		1	0	1	34	30	S	745377	Natrarchaeobaculum aegyptiacum		1	0	1	34	30	S	745377	Natrarchaeobaculum aegyptiacum
0	0	0	11	11	S	3026162	Halosimplex aquaticum		1	0	1	52	40	S	2044521	Natrarchaeobaculum sulfurireducens		1	0	1	52	40	S	2044521	Natrarchaeobaculum sulfurireducens
0	0	0	11	11	G	2806252	Haloglomus		3	0	0	143	120	G	121871	Haloterrigena		3	0	0	143	120	G	121871	Haloterrigena
0	0	0	3	3	S	2962672	Haloglomus halophilum		1	0	0	34	24	S	62320	Haloterrigena turkmenica		1	0	0	34	24	S	62320	Haloterrigena turkmenica
0	0	0	2	2	S	2962673	Haloglomus salinum		1	0	1	34	24	S1	543526	Haloterrigena turkmenica DSM 5511		1	0	1	34	24	S1	543526	Haloterrigena turkmenica DSM 5511
0	0	0	3	3	S	3034026	Haloglomus litoreum		1	0	0	30	27	G1	2631942	unclassified Haloterrigena		1	0	0	30	27	G1	2631942	unclassified Haloterrigena
0	0	0	2	2	G	2841540	Halosegnis		1	0	1	30	27	S	3132747	Haloterrigena sp. KLK7		1	0	1	30	27	S	3132747	Haloterrigena sp. KLK7
0	0	0	2	2	S	3034023	Halosegnis marinus		1	0	1	39	35	S	2816475	Haloterrigena alkaliphila		1	0	1	39	35	S	2816475	Haloterrigena alkaliphila
0	0	0	33	24	G	2907493	Halocatena		0	0	0	21	15	S	2675099	Haloterrigena salifodinae		0	0	0	21	15	S	2675099	Haloterrigena salifodinae
0	0	0	20	11	S	2934340	Halocatena salina		3	0	0	40	29	G	3065676	Salinilacihabitans		3	0	0	40	29	G	3065676	Salinilacihabitans
0	0	0	13	13	S	2934937	Halocatena marina		3	0	3	40	29	S	2961596	Salinilacihabitans rarus		3	0	3	40	29	S	2961596	Salinilacihabitans rarus
0	0	0	6	5	G	2907507	Halococcoides		2	0	0	53	48	G	3065677	Natrononativus		2	0	0	53	48	G	3065677	Natrononativus
0	0	0	6	5	S	1679096	Halococcoides cellulosivorans		2	0	2	53	48	S	2963434	Natrononativus amylolyticus		2	0	2	53	48	S	2963434	Natrononativus amylolyticus
13	0.01	0	408	321	F	1644056	Haloferacaceae		1	0	0	53	33	G	203193	Halobiforma		1	0	0	53	33	G	203193	Halobiforma
6	0.01	5	31	23	G	1073986	Halobellus		1	0	0	53	33	S	229731	Halobiforma lacisalsi		1	0	0	53	33	S	229731	Halobiforma lacisalsi
1	0	0	13	11	G1	2638438	unclassified Halobellus		1	0	1	53	33	S1	358396	Halobiforma lacisalsi AJ5		1	0	1	53	33	S1	358396	Halobiforma lacisalsi AJ5
1	0	1	13	11	S	3075123	Halobellus sp. DFY28		1	0	0	28	28	G	387342	Halopiger		1	0	0	28	28	G	387342	Halopiger
0	0	0	5	5	S	699433	Halobellus limi		1	0	0	28	28	S	387343	Halopiger xanaduensis		1	0	0	28	28	S	387343	Halopiger xanaduensis
0	0	0	3	3	S	1379040	Halobellus ramosii		1	0	1	28	28	S1	797210	Halopiger xanaduensis SH-6		1	0	1	28	28	S1	797210	Halopiger xanaduensis SH-6
4	0	0	87	68	G	43927	Halobaculum		1	0	0	50	41	G	1699375	Natribaculum		1	0	0	50	41	G	1699375	Natribaculum
2	0	2	27	14	S	2743089	Halobaculum salinum		1	0	1	50	41	S	1586232	Natribaculum luteum		1	0	1	50	41	S	1586232	Natribaculum luteum
1	0	0	30	28	G1	2640896	unclassified Halobaculum		1	0	0	36	31	G	2256	Natronobacterium		1	0	0	36	31	G	2256	Natronobacterium
1	0	1	8	8	S	3075121	Halobaculum sp. XH14		1	0	0	36	31	S	44930	Natronobacterium gregoryi		1	0	0	36	31	S	44930	Natronobacterium gregoryi
0	0	0	5	5	S	2904243	Halobaculum sp. CBA1158		1	0	1	36	31	S1	797304	Natronobacterium gregoryi SP2		1	0	1	36	31	S1	797304	Natronobacterium gregoryi SP2
0	0	0	1	1	S	3031916	Halobaculum sp. YSMS11		0	0	0	97	82	G	2993618	Halosolutus		0	0	0	97	82	G	2993618	Halosolutus
0	0	0	1	1	S	3031996	Halobaculum sp. DT55		0	0	0	47	39	S	1552990	Halosolutus halophilus		0	0	0	47	39	S	1552990	Halosolutus halophilus
0	0	0	2	2	S	3031998	Halobaculum sp. DT92		0	0	0	48	42	S	2931975	Halosolutus gelatinilyticus		0	0	0	48	42	S	2931975	Halosolutus gelatinilyticus
0	0	0	2	2	S	3032001	Halobaculum sp. DT31		0	0	0	38	35	G	3065678	Natronobeatus		0	0	0	38	35	G	3065678	Natronobeatus
0	0	0	1	1	S	3032281	Halobaculum sp. SYNS20		0	0	0	38	35	S	2963433	Natronobeatus ordinarius		0	0	0	38	35	S	2963433	Natronobeatus ordinarius
0	0	0	6	4	S	3075122	Halobaculum sp. QDC11		0	0	0	51	44	G	63742	Natrialba		0	0	0	51	44	G	63742	Natrialba
1	0	1	7	6	S	2872158	Halobaculum rubrum		0	0	0	51	44	S	13769	Natrialba magadii		0	0	0	51	44	S	13769	Natrialba magadii
0	0	0	1	1	S	1017351	Halobaculum magnesiiphilum		0	0	0	51	44	S1	547559	Natrialba magadii ATCC 43099		0	0	0	51	44	S1	547559	Natrialba magadii ATCC 43099
0	0	0	1	1	S	2175149	Halobaculum roseum		83	0.03	9	2288	1827	F	1644056	Haloferacaceae		83	0.03	9	2288	1827	F	1644056	Haloferacaceae
0	0	0	6	6	S	2743090	Halobaculum halophilum		16	0.01	3	429	357	G	43927	Halobaculum		16	0.01	3	429	357	G	43927	Halobaculum
1	0	0	74	52	G	56688	Halorubrum		11	0	0	229	187	G1	2640896	unclassified Halobaculum		11	0	0	229	187	G1	2640896	unclassified Halobaculum
1	0	1	5	4	S	337243	Halorubrum ezzemoulense		3	0	3	34	25	S	3032001	Halobaculum sp. DT31		3	0	3	34	25	S	3032001	Halobaculum sp. DT31
0	0	0	9	7	S	2247	Halorubrum lacusprofundi		2	0	2	34	25	S	3031916	Halobaculum sp. YSMS11		2	0	2	34	25	S	3031916	Halobaculum sp. YSMS11
0	0	0	9	7	S1	416348	Halorubrum lacusprofundi ATCC 49239		2	0	2	17	13	S	3032281	Halobaculum sp. SYNS20		2	0	2	17	13	S	3032281	Halobaculum sp. SYNS20
0	0	0	6	1	S	29284	Halorubrum trapanicum		2	0	2	49	43	S	3075121	Halobaculum sp. XH14		2	0	2	49	43	S	3075121	Halobaculum sp. XH14
0	0	0	29	18	G1	2642239	unclassified Halorubrum		1	0	1	24	20	S	3031996	Halobaculum sp. DT55		1	0	1	24	20	S	3031996	Halobaculum sp. DT55
0	0	0	15	4	S	634157	Halorubrum sp. PV6		1	0	1	17	13	S	3075122	Halobaculum sp. QDC11		1	0	1	17	13	S	3075122	Halobaculum sp. QDC11
0	0	0	4	4	S	1853699	Halorubrum sp. CBA1229		0	0	0	23	22	S	2904243	Halobaculum sp. CBA1158		0	0	0	23	22	S	2904243	Halobaculum sp. CBA1158
0	0	0	6	6	S	2497325	Halorubrum sp. BOL3-1		0	0	0	12	10	S	3031998	Halobaculum sp. DT92		0	0	0	12	10	S	3031998	Halobaculum sp. DT92
0	0	0	0	0	S	2527867	Halorubrum sp. DM2		1	0	1	47	39	S	2743089	Halobaculum salinum		1	0	1	47	39	S	2743089	Halobaculum salinum
0	0	0	2	2	S	2836432	Halorubrum sp. 2020YC2		1	0	1	48	37	S	2743090	Halobaculum halophilum		1	0	1	48	37	S	2743090	Halobaculum halophilum
0	0	0	4	4	S	2739057	Halorubrum salinarum		0	0	0	12	10	S	1017351	Halobaculum magnesiiphilum		0	0	0	12	10	S	1017351	Halobaculum magnesiiphilum
0	0	0	4	4	S	2949307	Halorubrum hochsteinianum		0	0	0	5	5	S	2175149	Halobaculum roseum		0	0	0	5	5	S	2175149	Halobaculum roseum
0	0	0	2	2	S	2982524	Halorubrum ruber		0	0	0	14	12	S	2872158	Halobaculum rubrum		0	0	0	14	12	S	2872158	Halobaculum rubrum
1	0	0	14	9	G	1209988	Halopenitus		11	0	1	161	115	G	2678343	Halalkaliarchaeum		11	0	1	161	115	G	2678343	Halalkaliarchaeum
1	0	1	14	9	S	1048396	Halopenitus persicus		6	0	0	58	41	G1	2678344	unclassified Halalkaliarchaeum		6	0	0	58	41	G1	2678344	unclassified Halalkaliarchaeum
1	0	0	37	25	G	1911573	Haloprofundus		6	0	6	58	41	S	2866381	Halalkaliarchaeum sp. AArc-CO		6	0	6	58	41	S	2866381	Halalkaliarchaeum sp. AArc-CO
1	0	1	11	10	S	2876190	Haloprofundus salilacus		4	0	4	66	44	S	2055893	Halalkaliarchaeum desulfuricum		4	0	4	66	44	S	2055893	Halalkaliarchaeum desulfuricum
0	0	0	4	4	G1	2629969	unclassified Haloprofundus		9	0	1	230	176	G	2251	Haloferax		9	0	1	230	176	G	2251	Haloferax
0	0	0	4	4	S	2572921	Haloprofundus sp. MHR1		4	0	4	53	28	S	35746	Haloferax gibbonsii		4	0	4	53	28	S	35746	Haloferax gibbonsii
0	0	0	5	2	S	2876193	Haloprofundus salinisoli		2	0	0	43	36	S	2252	Haloferax mediterranei		2	0	0	43	36	S	2252	Haloferax mediterranei
0	0	0	5	5	S	2876194	Haloprofundus halobius		2	0	2	43	36	S1	523841	Haloferax mediterranei ATCC 33500		2	0	2	43	36	S1	523841	Haloferax mediterranei ATCC 33500
0	0	0	27	26	G	2251	Haloferax		1	0	1	4	4	S	2254	Haloferax lucentense		1	0	1	4	4	S	2254	Haloferax lucentense
0	0	0	4	4	S	2246	Haloferax volcanii		1	0	1	54	41	S	302484	Haloferax larsenii		1	0	1	54	41	S	302484	Haloferax larsenii
0	0	0	4	4	S1	309800	Haloferax volcanii DS2		0	0	0	14	13	S	2246	Haloferax volcanii		0	0	0	14	13	S	2246	Haloferax volcanii
0	0	0	5	5	S	2252	Haloferax mediterranei		0	0	0	14	13	S1	309800	Haloferax volcanii DS2		0	0	0	14	13	S1	309800	Haloferax volcanii DS2
0	0	0	5	5	S1	523841	Haloferax mediterranei ATCC 33500		0	0	0	6	4	S	114529	Haloferax alexandrinus		0	0	0	6	4	S	114529	Haloferax alexandrinus
0	0	0	1	1	S	2254	Haloferax lucentense		7	0	0	282	227	G	56688	Halorubrum		7	0	0	282	227	G	56688	Halorubrum
0	0	0	9	8	S	35746	Haloferax gibbonsii		3	0	0	118	96	G1	2642239	unclassified Halorubrum		3	0	0	118	96	G1	2642239	unclassified Halorubrum
0	0	0	0	0	S	114529	Haloferax alexandrinus		3	0	3	23	21	S	1853699	Halorubrum sp. CBA1229		3	0	3	23	21	S	1853699	Halorubrum sp. CBA1229
0	0	0	2	2	S	302484	Haloferax larsenii		0	0	0	29	20	S	634157	Halorubrum sp. PV6		0	0	0	29	20	S	634157	Halorubrum sp. PV6
0	0	0	14	14	G	60846	Halogeometricum		0	0	0	35	24	S	2497325	Halorubrum sp. BOL3-1		0	0	0	35	24	S	2497325	Halorubrum sp. BOL3-1
0	0	0	14	14	S	60847	Halogeometricum borinquense		0	0	0	15	15	S	2527867	Halorubrum sp. DM2		0	0	0	15	15	S	2527867	Halorubrum sp. DM2
0	0	0	2	2	S1	469382	Halogeometricum borinquense DSM 11551		0	0	0	10	10	S	2836432	Halorubrum sp. 2020YC2		0	0	0	10	10	S	2836432	Halorubrum sp. 2020YC2
0	0	0	18	13	G	293431	Haloquadratum		2	0	0	44	26	S	2247	Halorubrum lacusprofundi		2	0	0	44	26	S	2247	Halorubrum lacusprofundi
0	0	0	18	13	S	293091	Haloquadratum walsbyi		2	0	2	44	26	S1	416348	Halorubrum lacusprofundi ATCC 49239		2	0	2	44	26	S1	416348	Halorubrum lacusprofundi ATCC 49239
0	0	0	4	3	S1	362976	Haloquadratum walsbyi DSM 16790		1	0	1	23	20	S	2739057	Halorubrum salinarum		1	0	1	23	20	S	2739057	Halorubrum salinarum
0	0	0	2	1	S1	768065	Haloquadratum walsbyi C23		1	0	1	13	13	S	2949307	Halorubrum hochsteinianum		1	0	1	13	13	S	2949307	Halorubrum hochsteinianum
0	0	0	34	29	G	376170	Haloplanus		0	0	0	9	7	S	29284	Halorubrum trapanicum		0	0	0	9	7	S	29284	Halorubrum trapanicum
0	0	0	7	7	S	660522	Haloplanus aerogenes		0	0	0	20	15	S	337243	Halorubrum ezzemoulense		0	0	0	20	15	S	337243	Halorubrum ezzemoulense
0	0	0	11	7	S	1547898	Haloplanus rubicundus		0	0	0	9	9	S	2982524	Halorubrum ruber		0	0	0	9	9	S	2982524	Halorubrum ruber
0	0	0	0	0	S	1816183	Haloplanus rallus		6	0	0	299	226	G	376170	Haloplanus		6	0	0	299	226	G	376170	Haloplanus
0	0	0	1	1	S	1912324	Haloplanus salinarum		3	0	0	91	76	G1	2617521	unclassified Haloplanus		3	0	0	91	76	G1	2617521	unclassified Haloplanus
0	0	0	10	9	G1	2617521	unclassified Haloplanus		2	0	2	37	27	S	2949994	Haloplanus sp. CK5-1		2	0	2	37	27	S	2949994	Haloplanus sp. CK5-1
0	0	0	4	3	S	2949993	Haloplanus sp. GDY1		1	0	1	22	20	S	2949993	Haloplanus sp. GDY1		1	0	1	22	20	S	2949993	Haloplanus sp. GDY1
0	0	0	3	3	S	2949994	Haloplanus sp. CK5-1		0	0	0	30	27	S	2949995	Haloplanus sp. HW8-1		0	0	0	30	27	S	2949995	Haloplanus sp. HW8-1
0	0	0	3	3	S	2949995	Haloplanus sp. HW8-1		1	0	1	37	29	S	660522	Haloplanus aerogenes		1	0	1	37	29	S	660522	Haloplanus aerogenes
0	0	0	5	3	G	1075397	Halolamina		1	0	1	70	38	S	1547898	Haloplanus rubicundus		1	0	1	70	38	S	1547898	Haloplanus rubicundus
0	0	0	5	3	G1	2634974	unclassified Halolamina		1	0	1	6	6	S	1816183	Haloplanus rallus		1	0	1	6	6	S	1816183	Haloplanus rallus
0	0	0	5	3	S	1853690	Halolamina sp. CBA1230		0	0	0	4	3	S	1912324	Haloplanus salinarum		0	0	0	4	3	S	1912324	Haloplanus salinarum
0	0	0	10	9	G	1450140	Halohasta		6	0	3	157	120	G	1911573	Haloprofundus		6	0	3	157	120	G	1911573	Haloprofundus
0	0	0	10	9	S	1073996	Halohasta litchfieldiae		2	0	2	36	34	S	2876190	Haloprofundus salilacus		2	0	2	36	34	S	2876190	Haloprofundus salilacus
0	0	0	20	17	G	1644057	Salinigranum		1	0	1	18	15	S	2876193	Haloprofundus salinisoli		1	0	1	18	15	S	2876193	Haloprofundus salinisoli
0	0	0	8	8	S	755307	Salinigranum rubrum		0	0	0	26	17	G1	2629969	unclassified Haloprofundus		0	0	0	26	17	G1	2629969	unclassified Haloprofundus
0	0	0	12	9	S	1515595	Salinigranum marinum		0	0	0	26	17	S	2572921	Haloprofundus sp. MHR1		0	0	0	26	17	S	2572921	Haloprofundus sp. MHR1
0	0	0	16	15	G	2678343	Halalkaliarchaeum		0	0	0	40	23	S	2876194	Haloprofundus halobius		0	0	0	40	23	S	2876194	Haloprofundus halobius
0	0	0	6	6	S	2055893	Halalkaliarchaeum desulfuricum		5	0	1	128	117	G	1073986	Halobellus		5	0	1	128	117	G	1073986	Halobellus
0	0	0	7	7	G1	2678344	unclassified Halalkaliarchaeum		2	0	2	20	18	S	1379040	Halobellus ramosii		2	0	2	20	18	S	1379040	Halobellus ramosii
0	0	0	7	7	S	2866381	Halalkaliarchaeum sp. AArc-CO		2	0	0	54	50	G1	2638438	unclassified Halobellus		2	0	0	54	50	G1	2638438	unclassified Halobellus
8	0.01	0	156	133	F	3064797	Haladaptataceae		2	0	2	54	50	S	3075123	Halobellus sp. DFY28		2	0	2	54	50	S	3075123	Halobellus sp. DFY28
5	0.01	1	63	55	G	1070314	Halorussus		0	0	0	38	35	S	699433	Halobellus limi		0	0	0	38	35	S	699433	Halobellus limi
2	0	2	11	10	S	2650975	Halorussus halophilus		5	0	0	132	110	G	1644057	Salinigranum		5	0	0	132	110	G	1644057	Salinigranum
1	0	1	10	9	S	2953749	Halorussus vallis		3	0	3	57	47	S	755307	Salinigranum rubrum		3	0	3	57	47	S	755307	Salinigranum rubrum
1	0	1	4	4	S	2953750	Halorussus salilacus		2	0	2	73	61	S	1515595	Salinigranum marinum		2	0	2	73	61	S	1515595	Salinigranum marinum
0	0	0	3	2	S	2505977	Halorussus pelagicus		4	0	0	94	72	G	293431	Haloquadratum		4	0	0	94	72	G	293431	Haloquadratum
0	0	0	0	0	S	2937524	Halorussus gelatinilyticus		4	0	4	94	72	S	293091	Haloquadratum walsbyi		4	0	4	94	72	S	293091	Haloquadratum walsbyi
0	0	0	6	5	S	2938695	Halorussus limi		0	0	0	9	9	S1	362976	Haloquadratum walsbyi DSM 16790		0	0	0	9	9	S1	362976	Haloquadratum walsbyi DSM 16790
0	0	0	10	9	S	2953748	Halorussus aquaticus		0	0	0	19	13	S1	768065	Haloquadratum walsbyi C23		0	0	0	19	13	S1	768065	Haloquadratum walsbyi C23
0	0	0	7	5	S	3034024	Halorussus lipolyticus		2	0	0	47	40	G	1075397	Halolamina		2	0	0	47	40	G	1075397	Halolamina
0	0	0	5	5	S	3034025	Halorussus caseinilyticus		2	0	0	47	40	G1	2634974	unclassified Halolamina		2	0	0	47	40	G1	2634974	unclassified Halolamina
3	0	0	74	63	G	367188	Haladaptatus		2	0	2	47	40	S	1853690	Halolamina sp. CBA1230		2	0	2	47	40	S	1853690	Halolamina sp. CBA1230
3	0	1	29	21	G1	2622732	unclassified Haladaptatus		1	0	0	69	61	G	60846	Halogeometricum		1	0	0	69	61	G	60846	Halogeometricum
1	0	1	2	2	S	3033384	Haladaptatus sp. YSMS36		1	0	1	69	61	S	60847	Halogeometricum borinquense		1	0	1	69	61	S	60847	Halogeometricum borinquense
1	0	1	10	6	S	3120516	Haladaptatus sp. DJG-WS-42		0	0	0	5	5	S1	469382	Halogeometricum borinquense DSM 11551		0	0	0	5	5	S1	469382	Halogeometricum borinquense DSM 11551
0	0	0	1	1	S	3032580	Haladaptatus sp. DYSN1		1	0	0	54	44	G	1209988	Halopenitus		1	0	0	54	44	G	1209988	Halopenitus
0	0	0	0	0	S	3033391	Haladaptatus sp. QDMS2		1	0	1	54	44	S	1048396	Halopenitus persicus		1	0	1	54	44	S	1048396	Halopenitus persicus
0	0	0	11	10	S	1008152	Haladaptatus pallidirubidus		1	0	0	43	41	G	1450140	Halohasta		1	0	0	43	41	G	1450140	Halohasta
0	0	0	5	5	S	2884875	Haladaptatus halobius		1	0	1	43	41	S	1073996	Halohasta litchfieldiae		1	0	1	43	41	S	1073996	Halohasta litchfieldiae
0	0	0	9	8	S	2884876	Haladaptatus salinisoli		29	0.01	1	916	759	F	3064797	Haladaptataceae		29	0.01	1	916	759	F	3064797	Haladaptataceae
0	0	0	7	7	S	2993314	Haladaptatus caseinilyticus		15	0.01	1	436	367	G	367188	Haladaptatus		15	0.01	1	436	367	G	367188	Haladaptatus
0	0	0	13	11	G	2614447	Halomicrococcus		5	0	2	147	116	G1	2622732	unclassified Haladaptatus		5	0	2	147	116	G1	2622732	unclassified Haladaptatus
0	0	0	13	11	S	1702103	Halomicrococcus gelatinilyticus		3	0	3	50	37	S	3120516	Haladaptatus sp. DJG-WS-42		3	0	3	50	37	S	3120516	Haladaptatus sp. DJG-WS-42
5	0.01	0	165	109	F	2236	Halobacteriaceae		0	0	0	8	7	S	3032580	Haladaptatus sp. DYSN1		0	0	0	8	7	S	3032580	Haladaptatus sp. DYSN1
2	0	0	48	37	G	2239	Halobacterium		0	0	0	6	4	S	3033384	Haladaptatus sp. YSMS36		0	0	0	6	4	S	3033384	Haladaptatus sp. YSMS36
1	0	1	7	7	S	223182	Halobacterium noricense		0	0	0	6	4	S	3033391	Haladaptatus sp. QDMS2		0	0	0	6	4	S	3033391	Haladaptatus sp. QDMS2
1	0	1	8	7	S	2902623	Halobacterium wangiae		4	0	4	51	46	S	2884876	Haladaptatus salinisoli		4	0	4	51	46	S	2884876	Haladaptatus salinisoli
0	0	0	2	2	S	2242	Halobacterium salinarum		3	0	3	58	48	S	1008152	Haladaptatus pallidirubidus		3	0	3	58	48	S	1008152	Haladaptatus pallidirubidus
0	0	0	2	2	S1	2886895	Halobacterium salinarum NRC-34001		1	0	1	79	68	S	2884875	Haladaptatus halobius		1	0	1	79	68	S	2884875	Haladaptatus halobius
0	0	0	0	0	S2	64091	Halobacterium salinarum NRC-1		1	0	1	48	42	S	2993314	Haladaptatus caseinilyticus		1	0	1	48	42	S	2993314	Haladaptatus caseinilyticus
0	0	0	1	1	S2	478009	Halobacterium salinarum R1		10	0	4	406	335	G	1070314	Halorussus		10	0	4	406	335	G	1070314	Halorussus
0	0	0	7	3	S	1407499	Halobacterium hubeiense		2	0	2	21	18	S	2505977	Halorussus pelagicus		2	0	2	21	18	S	2505977	Halorussus pelagicus
0	0	0	8	3	S	2039234	Halobacterium litoreum		2	0	2	55	48	S	2650975	Halorussus halophilus		2	0	2	55	48	S	2650975	Halorussus halophilus
0	0	0	1	1	G1	2668073	unclassified Halobacterium		1	0	1	40	33	S	2938695	Halorussus limi		1	0	1	40	33	S	2938695	Halorussus limi
0	0	0	0	0	S	2810537	Halobacterium sp. BOL4-2		1	0	1	68	50	S	2953749	Halorussus vallis		1	0	1	68	50	S	2953749	Halorussus vallis
0	0	0	1	1	S	2812551	Halobacterium sp. GSL-19		0	0	0	23	22	S	2937524	Halorussus gelatinilyticus		0	0	0	23	22	S	2937524	Halorussus gelatinilyticus
0	0	0	7	6	S	2902624	Halobacterium zhouii		0	0	0	44	34	S	2953748	Halorussus aquaticus		0	0	0	44	34	S	2953748	Halorussus aquaticus
1	0	0	16	12	G	744724	Halarchaeum		0	0	0	31	27	S	2953750	Halorussus salilacus		0	0	0	31	27	S	2953750	Halorussus salilacus
1	0	0	16	12	G1	2639520	unclassified Halarchaeum		0	0	0	31	26	S	3034024	Halorussus lipolyticus		0	0	0	31	26	S	3034024	Halorussus lipolyticus
1	0	1	16	12	S	1853682	Halarchaeum sp. CBA1220		0	0	0	34	29	S	3034025	Halorussus caseinilyticus		0	0	0	34	29	S	3034025	Halorussus caseinilyticus
1	0	0	43	24	G	1656823	Halanaeroarchaeum		3	0	0	52	39	G	2614447	Halomicrococcus		3	0	0	52	39	G	2614447	Halomicrococcus
1	0	1	33	14	S	1604004	Halanaeroarchaeum sulfurireducens		3	0	3	52	39	S	1702103	Halomicrococcus gelatinilyticus		3	0	3	52	39	S	1702103	Halomicrococcus gelatinilyticus
0	0	0	9	9	G1	2625373	unclassified Halanaeroarchaeum		27	0.01	0	781	565	F	2236	Halobacteriaceae		27	0.01	0	781	565	F	2236	Halobacteriaceae
0	0	0	9	9	S	2866382	Halanaeroarchaeum sp. HSR-CO		7	0	0	117	69	G	1980514	Halodesulfurarchaeum		7	0	0	117	69	G	1980514	Halodesulfurarchaeum
1	0	0	36	17	G	3118923	Actinarchaeum		7	0	7	117	69	S	1873524	Halodesulfurarchaeum formicicum		7	0	7	117	69	S	1873524	Halodesulfurarchaeum formicicum
1	0	1	36	17	S	2814576	Actinarchaeum halophilum		6	0	0	258	193	G	2239	Halobacterium		6	0	0	258	193	G	2239	Halobacterium
0	0	0	1	1	G	1075398	Salarchaeum		4	0	4	69	30	S	223182	Halobacterium noricense		4	0	4	69	30	S	223182	Halobacterium noricense
0	0	0	0	0	S	555573	Salarchaeum japonicum		1	0	1	45	38	S	2902623	Halobacterium wangiae		1	0	1	45	38	S	2902623	Halobacterium wangiae
0	0	0	1	1	G1	2648404	unclassified Salarchaeum		1	0	1	39	31	S	2902624	Halobacterium zhouii		1	0	1	39	31	S	2902624	Halobacterium zhouii
0	0	0	1	1	S	2599399	Salarchaeum sp. JOR-1		0	0	0	14	11	S	2242	Halobacterium salinarum		0	0	0	14	11	S	2242	Halobacterium salinarum
0	0	0	13	10	G	1980514	Halodesulfurarchaeum		0	0	0	8	6	S1	2886895	Halobacterium salinarum NRC-34001		0	0	0	8	6	S1	2886895	Halobacterium salinarum NRC-34001
0	0	0	13	10	S	1873524	Halodesulfurarchaeum formicicum		0	0	0	0	0	S2	64091	Halobacterium salinarum NRC-1		0	0	0	0	0	S2	64091	Halobacterium salinarum NRC-1
0	0	0	7	7	G	3116496	Halospeciosus		0	0	0	0	0	S2	478009	Halobacterium salinarum R1		0	0	0	0	0	S2	478009	Halobacterium salinarum R1
0	0	0	7	7	S	3032283	Halospeciosus flavus		0	0	0	14	13	S	1407499	Halobacterium hubeiense		0	0	0	14	13	S	1407499	Halobacterium hubeiense
1	0	0	65	40	F	1963270	Halococcaceae		0	0	0	24	22	S	2039234	Halobacterium litoreum		0	0	0	24	22	S	2039234	Halobacterium litoreum
1	0	0	38	28	G	332246	Halalkalicoccus		0	0	0	2	2	G1	2668073	unclassified Halobacterium		0	0	0	2	2	G1	2668073	unclassified Halobacterium
1	0	0	10	10	S	413810	Halalkalicoccus jeotgali		0	0	0	1	1	S	2810537	Halobacterium sp. BOL4-2		0	0	0	1	1	S	2810537	Halobacterium sp. BOL4-2
1	0	1	10	10	S1	795797	Halalkalicoccus jeotgali B3		0	0	0	1	1	S	2812551	Halobacterium sp. GSL-19		0	0	0	1	1	S	2812551	Halobacterium sp. GSL-19
0	0	0	28	18	G1	2621952	unclassified Halalkalicoccus		6	0	2	145	97	G	1656823	Halanaeroarchaeum		6	0	2	145	97	G	1656823	Halanaeroarchaeum
0	0	0	21	11	S	3117459	Halalkalicoccus sp. FCH27		3	0	0	49	36	G1	2625373	unclassified Halanaeroarchaeum		3	0	0	49	36	G1	2625373	unclassified Halanaeroarchaeum
0	0	0	7	7	S	3117733	Halalkalicoccus sp. CGA53		3	0	3	49	36	S	2866382	Halanaeroarchaeum sp. HSR-CO		3	0	3	49	36	S	2866382	Halanaeroarchaeum sp. HSR-CO
0	0	0	26	11	G	2249	Halococcus		1	0	1	60	48	S	1604004	Halanaeroarchaeum sulfurireducens		1	0	1	60	48	S	1604004	Halanaeroarchaeum sulfurireducens
0	0	0	8	7	S	179637	Halococcus dombrowskii		4	0	0	54	43	G	744724	Halarchaeum		4	0	0	54	43	G	744724	Halarchaeum
0	0	0	2	2	S	224402	Halococcus qingdaonensis		4	0	0	54	43	G1	2639520	unclassified Halarchaeum		4	0	0	54	43	G1	2639520	unclassified Halarchaeum
1	0	0	58	42	F	2976354	Natronoarchaeaceae		4	0	4	54	43	S	1853682	Halarchaeum sp. CBA1220		4	0	4	54	43	S	1853682	Halarchaeum sp. CBA1220
1	0	0	43	31	G	1269201	Salinarchaeum		2	0	0	98	78	G	3118923	Actinarchaeum		2	0	0	98	78	G	3118923	Actinarchaeum
1	0	0	34	22	G1	2621923	unclassified Salinarchaeum		2	0	2	98	78	S	2814576	Actinarchaeum halophilum		2	0	2	98	78	S	2814576	Actinarchaeum halophilum
1	0	1	17	17	S	2862870	Salinarchaeum sp. IM2453		1	0	0	34	26	G	1075398	Salarchaeum		1	0	0	34	26	G	1075398	Salarchaeum
0	0	0	17	5	S	1333523	Salinarchaeum sp. Harcht-Bsk1		1	0	0	16	10	G1	2648404	unclassified Salarchaeum		1	0	0	16	10	G1	2648404	unclassified Salarchaeum
0	0	0	5	5	S	869888	Salinarchaeum laminariae		1	0	1	16	10	S	2599399	Salarchaeum sp. JOR-1		1	0	1	16	10	S	2599399	Salarchaeum sp. JOR-1
0	0	0	14	10	G	2917705	Natranaeroarchaeum		0	0	0	12	10	S	555573	Salarchaeum japonicum		0	0	0	12	10	S	555573	Salarchaeum japonicum
0	0	0	14	10	S	2784880	Natranaeroarchaeum sulfidigenes		1	0	0	58	43	G	3116496	Halospeciosus		1	0	0	58	43	G	3116496	Halospeciosus
95	0.1	0	1847	1460	C	183968	Thermococci		1	0	1	58	43	S	3032283	Halospeciosus flavus		1	0	1	58	43	S	3032283	Halospeciosus flavus
95	0.1	0	1847	1460	O	2258	Thermococcales		14	0.01	0	303	248	F	1963270	Halococcaceae		14	0.01	0	303	248	F	1963270	Halococcaceae
95	0.1	14	1847	1460	F	2259	Thermococcaceae		8	0	1	208	174	G	332246	Halalkalicoccus		8	0	1	208	174	G	332246	Halalkalicoccus
59	0.06	18	1090	852	G	2263	Thermococcus		5	0	0	143	114	G1	2621952	unclassified Halalkalicoccus		5	0	0	143	114	G1	2621952	unclassified Halalkalicoccus
8	0.01	0	131	102	G1	2627626	unclassified Thermococcus		4	0	4	56	46	S	3117459	Halalkalicoccus sp. FCH27		4	0	4	56	46	S	3117459	Halalkalicoccus sp. FCH27
5	0.01	5	36	29	S	1674923	Thermococcus sp. 2319x1		1	0	1	86	67	S	3117733	Halalkalicoccus sp. CGA53		1	0	1	86	67	S	3117733	Halalkalicoccus sp. CGA53
2	0	2	38	27	S	3111325	Thermococcus sp. SY098		2	0	0	58	53	S	413810	Halalkalicoccus jeotgali		2	0	0	58	53	S	413810	Halalkalicoccus jeotgali
1	0	1	10	8	S	246969	Thermococcus sp. AM4		2	0	2	58	53	S1	795797	Halalkalicoccus jeotgali B3		2	0	2	58	53	S1	795797	Halalkalicoccus jeotgali B3
0	0	0	31	25	S	122420	Thermococcus sp. P6		6	0	3	93	73	G	2249	Halococcus		6	0	3	93	73	G	2249	Halococcus
0	0	0	3	3	S	1042877	Thermococcus sp. 4557		3	0	3	49	37	S	179637	Halococcus dombrowskii		3	0	3	49	37	S	179637	Halococcus dombrowskii
0	0	0	11	8	S	2008440	Thermococcus sp. 5-4		0	0	0	11	8	S	224402	Halococcus qingdaonensis		0	0	0	11	8	S	224402	Halococcus qingdaonensis
6	0.01	0	36	24	S	187878	Thermococcus gammatolerans		13	0.01	0	247	200	F	2976354	Natronoarchaeaceae		13	0.01	0	247	200	F	2976354	Natronoarchaeaceae
6	0.01	6	36	24	S1	593117	Thermococcus gammatolerans EJ3		9	0	0	186	155	G	1269201	Salinarchaeum		9	0	0	186	155	G	1269201	Salinarchaeum
6	0.01	0	47	33	S	172049	Thermococcus sibiricus		5	0	0	128	106	G1	2621923	unclassified Salinarchaeum		5	0	0	128	106	G1	2621923	unclassified Salinarchaeum
6	0.01	6	47	33	S1	604354	Thermococcus sibiricus MM 739		3	0	3	90	72	S	2862870	Salinarchaeum sp. IM2453		3	0	3	90	72	S	2862870	Salinarchaeum sp. IM2453
4	0	0	30	24	S	2265	Thermococcus litoralis		2	0	2	38	34	S	1333523	Salinarchaeum sp. Harcht-Bsk1		2	0	2	38	34	S	1333523	Salinarchaeum sp. Harcht-Bsk1
4	0	4	30	24	S1	523849	Thermococcus litoralis DSM 5473		4	0	4	41	33	S	869888	Salinarchaeum laminariae		4	0	4	41	33	S	869888	Salinarchaeum laminariae
3	0	1	38	27	S	55802	Thermococcus barophilus		4	0	0	59	44	G	2917705	Natranaeroarchaeum		4	0	0	59	44	G	2917705	Natranaeroarchaeum
2	0	2	12	3	S1	391623	Thermococcus barophilus MP		4	0	4	59	44	S	2784880	Natranaeroarchaeum sulfidigenes		4	0	4	59	44	S	2784880	Natranaeroarchaeum sulfidigenes
2	0	2	14	8	S	311400	Thermococcus kodakarensis		747	0.3	22	11877	8878	P1	2283794	Methanomada group		747	0.3	22	11877	8878	P1	2283794	Methanomada group
0	0	0	0	0	S1	69014	Thermococcus kodakarensis KOD1		394	0.16	0	6282	4780	C	183925	Methanobacteria		394	0.16	0	6282	4780	C	183925	Methanobacteria
2	0	2	20	19	S	195522	Thermococcus nautili		394	0.16	0	6282	4780	O	2158	Methanobacteriales		394	0.16	0	6282	4780	O	2158	Methanobacteriales
1	0	1	24	24	S	110163	Thermococcus aggregans		394	0.16	44	6282	4780	F	2159	Methanobacteriaceae		394	0.16	44	6282	4780	F	2159	Methanobacteriaceae
1	0	0	13	11	S	342948	Thermococcus onnurineus		154	0.06	39	2461	1905	G	2160	Methanobacterium		154	0.06	39	2461	1905	G	2160	Methanobacterium
1	0	1	13	11	S1	523850	Thermococcus onnurineus NA1		36	0.01	0	302	218	G1	2627676	unclassified Methanobacterium		36	0.01	0	302	218	G1	2627676	unclassified Methanobacterium
1	0	1	11	11	S	2016373	Thermococcus camini		23	0.01	23	194	145	S	2584467	Methanobacterium sp. CWC-01		23	0.01	23	194	145	S	2584467	Methanobacterium sp. CWC-01
1	0	1	13	11	S	163003	Thermococcus cleftensis		10	0	10	85	56	S	2025351	Methanobacterium sp. BAmetb5		10	0	10	85	56	S	2025351	Methanobacterium sp. BAmetb5
1	0	1	9	8	S	2598455	Thermococcus aciditolerans		3	0	3	22	16	S	1911685	Methanobacterium sp. MZ-A1		3	0	3	22	16	S	1911685	Methanobacterium sp. MZ-A1
1	0	1	22	18	S	71997	Thermococcus gorgonarius		19	0.01	19	268	192	S	2731220	Methanobacterium alkalithermotolerans		19	0.01	19	268	192	S	2731220	Methanobacterium alkalithermotolerans
1	0	1	20	20	S	54262	Thermococcus chitonophagus		13	0.01	0	225	172	G1	176305	environmental samples		13	0.01	0	225	172	G1	176305	environmental samples
1	0	1	28	25	S	2866384	Thermococcus argininiproducens		13	0.01	13	225	172	S	176306	uncultured Methanobacterium sp.		13	0.01	13	225	172	S	176306	uncultured Methanobacterium sp.
1	0	0	31	18	S	2264	Thermococcus celer		11	0	11	163	132	S	118062	Methanobacterium congolense		11	0	11	163	132	S	118062	Methanobacterium congolense
1	0	1	31	18	S1	1293037	Thermococcus celer Vu 13 = JCM 8558		10	0	10	209	179	S	877455	Methanobacterium lacus		10	0	10	209	179	S	877455	Methanobacterium lacus
1	0	1	13	12	S	49899	Thermococcus profundus		8	0	8	194	160	S	868131	Methanobacterium paludis		8	0	8	194	160	S	868131	Methanobacterium paludis
0	0	0	16	10	S	2586643	Thermococcus indicus		6	0	6	119	96	S	710190	Methanobacterium petrolearium		6	0	6	119	96	S	710190	Methanobacterium petrolearium
0	0	0	17	9	S	2969672	Thermococcus thermotolerans		6	0	6	127	106	S	710191	Methanobacterium ferruginis		6	0	6	127	106	S	710191	Methanobacterium ferruginis
0	0	0	26	13	S	2016361	Thermococcus henrietii		5	0	5	90	69	S	2162	Methanobacterium formicicum		5	0	5	90	69	S	2162	Methanobacterium formicicum
0	0	0	13	13	S	1712654	Thermococcus piezophilus		1	0	1	41	32	S	59277	Methanobacterium subterraneum		1	0	1	41	32	S	59277	Methanobacterium subterraneum
0	0	0	7	7	S	1505907	Thermococcus eurythermalis		85	0.03	32	1319	982	G	2172	Methanobrevibacter		85	0.03	32	1319	982	G	2172	Methanobrevibacter
0	0	0	23	23	S	582419	Thermococcus paralvinellae		21	0.01	2	414	275	G1	2638681	unclassified Methanobrevibacter		21	0.01	2	414	275	G1	2638681	unclassified Methanobrevibacter
0	0	0	5	3	S	277988	Thermococcus thioreducens		10	0	10	123	104	S	1609968	Methanobrevibacter sp. YE315		10	0	10	123	104	S	1609968	Methanobrevibacter sp. YE315
0	0	0	2	2	S	187880	Thermococcus radiotolerans		7	0	7	252	138	S	224719	Methanobrevibacter sp. AbM4		7	0	7	252	138	S	224719	Methanobrevibacter sp. AbM4
0	0	0	8	8	S	110164	Thermococcus guaymasensis		2	0	2	31	29	S	2870563	Methanobrevibacter sp. TLL-48-HuF1		2	0	2	31	29	S	2870563	Methanobrevibacter sp. TLL-48-HuF1
0	0	0	8	8	S1	1432656	Thermococcus guaymasensis DSM 11113		9	0	9	191	150	S	39441	Methanobrevibacter arboriphilus		9	0	9	191	150	S	39441	Methanobrevibacter arboriphilus
0	0	0	7	7	S	72803	Thermococcus siculi		8	0	0	112	88	S	83816	Methanobrevibacter ruminantium		8	0	0	112	88	S	83816	Methanobrevibacter ruminantium
0	0	0	5	4	S	71998	Thermococcus pacificus		8	0	8	112	88	S1	634498	Methanobrevibacter ruminantium M1		8	0	8	112	88	S1	634498	Methanobrevibacter ruminantium M1
0	0	0	3	3	S	54077	Thermococcus barossii		7	0	7	95	78	S	230361	Methanobrevibacter millerae		7	0	7	95	78	S	230361	Methanobrevibacter millerae
0	0	0	13	7	S	53952	Thermococcus peptonophilus		7	0	7	90	71	S	294671	Methanobrevibacter olleyae		7	0	7	90	71	S	294671	Methanobrevibacter olleyae
17	0.02	3	290	230	G	2260	Pyrococcus		1	0	1	57	41	S	2173	Methanobrevibacter smithii		1	0	1	57	41	S	2173	Methanobrevibacter smithii
4	0	4	33	30	S	2261	Pyrococcus furiosus		0	0	0	10	10	S1	420247	Methanobrevibacter smithii ATCC 35061		0	0	0	10	10	S1	420247	Methanobrevibacter smithii ATCC 35061
0	0	0	0	0	S1	186497	Pyrococcus furiosus DSM 3638		83	0.03	45	1205	893	G	145260	Methanothermobacter		83	0.03	45	1205	893	G	145260	Methanothermobacter
0	0	0	0	0	S1	1185654	Pyrococcus furiosus COM1		30	0.01	30	354	260	S	680118	Methanothermobacter tenebrarum		30	0.01	30	354	260	S	680118	Methanothermobacter tenebrarum
3	0	0	37	28	S	1008460	Pyrococcus yayanosii		6	0	1	126	100	G1	2631116	unclassified Methanothermobacter		6	0	1	126	100	G1	2631116	unclassified Methanothermobacter
3	0	3	37	28	S1	529709	Pyrococcus yayanosii CH1		2	0	2	28	22	S	2998972	Methanothermobacter sp. DP		2	0	2	28	22	S	2998972	Methanothermobacter sp. DP
3	0	3	15	14	S	1609559	Pyrococcus kukulkanii		1	0	1	17	15	S	866790	Methanothermobacter sp. CaT2		1	0	1	17	15	S	866790	Methanothermobacter sp. CaT2
2	0	0	66	58	G1	2629106	unclassified Pyrococcus		1	0	1	16	12	S	2606911	Methanothermobacter sp. THM-1		1	0	1	16	12	S	2606911	Methanothermobacter sp. THM-1
1	0	1	40	37	S	342949	Pyrococcus sp. NA2		1	0	1	11	10	S	2606912	Methanothermobacter sp. THM-2		1	0	1	11	10	S	2606912	Methanothermobacter sp. THM-2
1	0	1	26	21	S	1183377	Pyrococcus sp. ST04		0	0	0	7	5	S	2017966	Methanothermobacter sp. EMTCatA1		0	0	0	7	5	S	2017966	Methanothermobacter sp. EMTCatA1
1	0	0	25	15	S	29292	Pyrococcus abyssi		0	0	0	13	11	S	2603820	Methanothermobacter sp. KEPCO-1		0	0	0	13	11	S	2603820	Methanothermobacter sp. KEPCO-1
1	0	1	25	15	S1	272844	Pyrococcus abyssi GE5		1	0	1	20	18	S	145262	Methanothermobacter thermautotrophicus		1	0	1	20	18	S	145262	Methanothermobacter thermautotrophicus
1	0	0	53	38	S	53953	Pyrococcus horikoshii		0	0	0	0	0	S1	187420	Methanothermobacter thermautotrophicus str. Delta H		0	0	0	0	0	S1	187420	Methanothermobacter thermautotrophicus str. Delta H
1	0	1	53	38	S1	70601	Pyrococcus horikoshii OT3		1	0	1	14	12	S	145263	Methanothermobacter marburgensis		1	0	1	14	12	S	145263	Methanothermobacter marburgensis
5	0.01	0	39	30	G	83867	Palaeococcus		0	0	0	0	0	S1	79929	Methanothermobacter marburgensis str. Marburg		0	0	0	0	0	S1	79929	Methanothermobacter marburgensis str. Marburg
5	0.01	0	39	30	S	971279	Palaeococcus pacificus		0	0	0	8	8	S	145261	Methanothermobacter wolfeii		0	0	0	8	8	S	145261	Methanothermobacter wolfeii
5	0.01	5	39	30	S1	1343739	Palaeococcus pacificus DY20341		28	0.01	7	474	397	G	2316	Methanosphaera		28	0.01	7	474	397	G	2316	Methanosphaera
70	0.08	3	1453	1230	P1	2283794	Methanomada group		17	0.01	2	280	235	G1	2643926	unclassified Methanosphaera		17	0.01	2	280	235	G1	2643926	unclassified Methanosphaera
30	0.03	0	753	633	C	183925	Methanobacteria		10	0	10	147	119	S	1789762	Methanosphaera sp. BMS		10	0	10	147	119	S	1789762	Methanosphaera sp. BMS
30	0.03	0	753	633	O	2158	Methanobacteriales		5	0	5	115	98	S	1452353	Methanosphaera sp. ISO3-F5		5	0	5	115	98	S	1452353	Methanosphaera sp. ISO3-F5
30	0.03	2	753	633	F	2159	Methanobacteriaceae		4	0	4	95	81	S	2317	Methanosphaera stadtmanae		4	0	4	95	81	S	2317	Methanosphaera stadtmanae
13	0.01	5	272	242	G	2160	Methanobacterium		0	0	0	0	0	S1	339860	Methanosphaera stadtmanae DSM 3091		0	0	0	0	0	S1	339860	Methanosphaera stadtmanae DSM 3091
3	0	0	44	37	G1	2627676	unclassified Methanobacterium		297	0.12	0	4629	3405	C	183939	Methanococci		297	0.12	0	4629	3405	C	183939	Methanococci
2	0	2	32	27	S	2584467	Methanobacterium sp. CWC-01		297	0.12	31	4629	3405	O	2182	Methanococcales		297	0.12	31	4629	3405	O	2182	Methanococcales
1	0	1	10	9	S	2025351	Methanobacterium sp. BAmetb5		170	0.07	7	2396	1692	F	196117	Methanocaldococcaceae		170	0.07	7	2396	1692	F	196117	Methanocaldococcaceae
0	0	0	2	1	S	1911685	Methanobacterium sp. MZ-A1		148	0.06	49	1955	1349	G	196118	Methanocaldococcus		148	0.06	49	1955	1349	G	196118	Methanocaldococcus
2	0	2	9	8	S	710191	Methanobacterium ferruginis		25	0.01	0	249	182	S	83171	Methanocaldococcus fervens		25	0.01	0	249	182	S	83171	Methanocaldococcus fervens
1	0	1	10	9	S	2162	Methanobacterium formicicum		25	0.01	25	249	182	S1	573064	Methanocaldococcus fervens AG86		25	0.01	25	249	182	S1	573064	Methanocaldococcus fervens AG86
1	0	1	8	5	S	59277	Methanobacterium subterraneum		18	0.01	0	335	249	S	67760	Methanocaldococcus infernus		18	0.01	0	335	249	S	67760	Methanocaldococcus infernus
1	0	0	27	25	G1	176305	environmental samples		18	0.01	18	335	249	S1	573063	Methanocaldococcus infernus ME		18	0.01	18	335	249	S1	573063	Methanocaldococcus infernus ME
1	0	1	27	25	S	176306	uncultured Methanobacterium sp.		16	0.01	16	197	118	S	1301915	Methanocaldococcus bathoardescens		16	0.01	16	197	118	S	1301915	Methanocaldococcus bathoardescens
0	0	0	17	17	S	118062	Methanobacterium congolense		15	0.01	0	122	62	S	2190	Methanocaldococcus jannaschii		15	0.01	0	122	62	S	2190	Methanocaldococcus jannaschii
0	0	0	13	13	S	710190	Methanobacterium petrolearium		15	0.01	15	122	62	S1	243232	Methanocaldococcus jannaschii DSM 2661		15	0.01	15	122	62	S1	243232	Methanocaldococcus jannaschii DSM 2661
0	0	0	15	14	S	868131	Methanobacterium paludis		13	0.01	13	244	162	S	2546128	Methanocaldococcus lauensis		13	0.01	13	244	162	S	2546128	Methanocaldococcus lauensis
0	0	0	22	20	S	877455	Methanobacterium lacus		7	0	0	133	104	S	73913	Methanocaldococcus vulcanius		7	0	0	133	104	S	73913	Methanocaldococcus vulcanius
0	0	0	37	33	S	2731220	Methanobacterium alkalithermotolerans		7	0	7	133	104	S1	579137	Methanocaldococcus vulcanius M7		7	0	7	133	104	S1	579137	Methanocaldococcus vulcanius M7
7	0.01	3	240	180	G	2172	Methanobrevibacter		5	0	0	89	69	G1	2641196	unclassified Methanocaldococcus		5	0	0	89	69	G1	2641196	unclassified Methanocaldococcus
4	0	0	91	63	G1	2638681	unclassified Methanobrevibacter		5	0	5	89	69	S	644281	Methanocaldococcus sp. FS406-22		5	0	5	89	69	S	644281	Methanocaldococcus sp. FS406-22
2	0	2	40	31	S	224719	Methanobrevibacter sp. AbM4		15	0.01	0	316	242	G	196119	Methanotorris		15	0.01	0	316	242	G	196119	Methanotorris
2	0	2	41	22	S	1609968	Methanobrevibacter sp. YE315		15	0.01	0	316	242	S	2189	Methanotorris igneus		15	0.01	0	316	242	S	2189	Methanotorris igneus
0	0	0	9	9	S	2870563	Methanobrevibacter sp. TLL-48-HuF1		15	0.01	15	316	242	S1	880724	Methanotorris igneus Kol 5		15	0.01	15	316	242	S1	880724	Methanotorris igneus Kol 5
0	0	0	13	11	S	2173	Methanobrevibacter smithii		67	0.03	6	1129	925	F	2183	Methanococcaceae		67	0.03	6	1129	925	F	2183	Methanococcaceae
0	0	0	0	0	S1	420247	Methanobrevibacter smithii ATCC 35061		39	0.02	2	684	550	G	2184	Methanococcus		39	0.02	2	684	550	G	2184	Methanococcus
0	0	0	35	24	S	39441	Methanobrevibacter arboriphilus		18	0.01	16	207	148	S	42879	Methanococcus aeolicus		18	0.01	16	207	148	S	42879	Methanococcus aeolicus
0	0	0	19	18	S	83816	Methanobrevibacter ruminantium		2	0	2	11	9	S1	419665	Methanococcus aeolicus Nankai-3		2	0	2	11	9	S1	419665	Methanococcus aeolicus Nankai-3
0	0	0	19	18	S1	634498	Methanobrevibacter ruminantium M1		15	0.01	13	270	222	S	39152	Methanococcus maripaludis		15	0.01	13	270	222	S	39152	Methanococcus maripaludis
0	0	0	8	8	S	230361	Methanobrevibacter millerae		2	0	2	61	55	S1	402880	Methanococcus maripaludis C5		2	0	2	61	55	S1	402880	Methanococcus maripaludis C5
0	0	0	11	11	S	294671	Methanobrevibacter olleyae		0	0	0	10	9	S1	267377	Methanococcus maripaludis S2		0	0	0	10	9	S1	267377	Methanococcus maripaludis S2
6	0.01	2	132	112	G	145260	Methanothermobacter		0	0	0	9	8	S1	637914	Methanococcus maripaludis KA1		0	0	0	9	8	S1	637914	Methanococcus maripaludis KA1
3	0	3	36	30	S	680118	Methanothermobacter tenebrarum		0	0	0	0	0	S1	637915	Methanococcus maripaludis OS7		0	0	0	0	0	S1	637915	Methanococcus maripaludis OS7
1	0	1	3	3	S	145263	Methanothermobacter marburgensis		0	0	0	9	9	S1	1053692	Methanococcus maripaludis X1		0	0	0	9	9	S1	1053692	Methanococcus maripaludis X1
0	0	0	0	0	S1	79929	Methanothermobacter marburgensis str. Marburg		4	0	0	133	120	S	2187	Methanococcus vannielii		4	0	0	133	120	S	2187	Methanococcus vannielii
0	0	0	1	1	S	145261	Methanothermobacter wolfeii		4	0	4	133	120	S1	406327	Methanococcus vannielii SB		4	0	4	133	120	S1	406327	Methanococcus vannielii SB
0	0	0	5	3	S	145262	Methanothermobacter thermautotrophicus		22	0.01	0	339	285	G	155862	Methanothermococcus		22	0.01	0	339	285	G	155862	Methanothermococcus
0	0	0	0	0	S1	187420	Methanothermobacter thermautotrophicus str. Delta H		11	0	0	175	143	S	2186	Methanothermococcus thermolithotrophicus		11	0	0	175	143	S	2186	Methanothermococcus thermolithotrophicus
0	0	0	13	12	G1	2631116	unclassified Methanothermobacter		11	0	11	175	143	S1	523845	Methanothermococcus thermolithotrophicus DSM 2095		11	0	11	175	143	S1	523845	Methanothermococcus thermolithotrophicus DSM 2095
0	0	0	1	1	S	866790	Methanothermobacter sp. CaT2		11	0	0	151	130	S	155863	Methanothermococcus okinawensis		11	0	0	151	130	S	155863	Methanothermococcus okinawensis
0	0	0	3	3	S	2017966	Methanothermobacter sp. EMTCatA1		11	0	11	151	130	S1	647113	Methanothermococcus okinawensis IH1		11	0	11	151	130	S1	647113	Methanothermococcus okinawensis IH1
0	0	0	3	3	S	2603820	Methanothermobacter sp. KEPCO-1		29	0.01	0	506	356	O1	114584	Methanococcales incertae sedis		29	0.01	0	506	356	O1	114584	Methanococcales incertae sedis
0	0	0	0	0	S	2606911	Methanothermobacter sp. THM-1		29	0.01	0	506	356	G	2607661	Methanofervidicoccus		29	0.01	0	506	356	G	2607661	Methanofervidicoccus
0	0	0	3	2	S	2606912	Methanothermobacter sp. THM-2		29	0.01	0	506	356	G1	2624956	unclassified Methanofervidicoccus		29	0.01	0	506	356	G1	2624956	unclassified Methanofervidicoccus
0	0	0	0	0	S	2998972	Methanothermobacter sp. DP		29	0.01	29	506	356	S	2607662	Methanofervidicoccus sp. A16		29	0.01	29	506	356	S	2607662	Methanofervidicoccus sp. A16
2	0	1	51	45	G	2316	Methanosphaera		34	0.01	0	518	397	C	183988	Methanopyri		34	0.01	0	518	397	C	183988	Methanopyri
1	0	1	12	11	S	2317	Methanosphaera stadtmanae		34	0.01	0	518	397	O	68985	Methanopyrales		34	0.01	0	518	397	O	68985	Methanopyrales
0	0	0	0	0	S1	339860	Methanosphaera stadtmanae DSM 3091		34	0.01	0	518	397	F	183713	Methanopyraceae		34	0.01	0	518	397	F	183713	Methanopyraceae
0	0	0	32	28	G1	2643926	unclassified Methanosphaera		34	0.01	27	518	397	G	2319	Methanopyrus		34	0.01	27	518	397	G	2319	Methanopyrus
0	0	0	12	10	S	1452353	Methanosphaera sp. ISO3-F5		5	0	2	86	72	G1	2684913	unclassified Methanopyrus		5	0	2	86	72	G1	2684913	unclassified Methanopyrus
0	0	0	18	16	S	1789762	Methanosphaera sp. BMS		2	0	2	9	9	S	1937005	Methanopyrus sp. SNP6		2	0	2	9	9	S	1937005	Methanopyrus sp. SNP6
26	0.03	0	578	499	C	183939	Methanococci		1	0	1	12	9	S	1937004	Methanopyrus sp. KOL6		1	0	1	12	9	S	1937004	Methanopyrus sp. KOL6
26	0.03	1	578	499	O	2182	Methanococcales		2	0	0	84	68	S	2320	Methanopyrus kandleri		2	0	0	84	68	S	2320	Methanopyrus kandleri
17	0.02	0	334	272	F	196117	Methanocaldococcaceae		2	0	2	84	68	S1	190192	Methanopyrus kandleri AV19		2	0	2	84	68	S1	190192	Methanopyrus kandleri AV19
15	0.02	7	251	223	G	196118	Methanocaldococcus		561	0.23	0	9232	6864	C	183968	Thermococci		561	0.23	0	9232	6864	C	183968	Thermococci
3	0	0	33	25	S	2190	Methanocaldococcus jannaschii		561	0.23	0	9232	6864	O	2258	Thermococcales		561	0.23	0	9232	6864	O	2258	Thermococcales
3	0	3	33	25	S1	243232	Methanocaldococcus jannaschii DSM 2661		561	0.23	101	9232	6864	F	2259	Thermococcaceae		561	0.23	101	9232	6864	F	2259	Thermococcaceae
1	0	0	45	37	S	67760	Methanocaldococcus infernus		370	0.15	135	5381	3934	G	2263	Thermococcus		370	0.15	135	5381	3934	G	2263	Thermococcus
1	0	1	45	37	S1	573063	Methanocaldococcus infernus ME		46	0.02	0	564	443	G1	2627626	unclassified Thermococcus		46	0.02	0	564	443	G1	2627626	unclassified Thermococcus
1	0	0	29	29	S	73913	Methanocaldococcus vulcanius		20	0.01	20	197	143	S	1674923	Thermococcus sp. 2319x1		20	0.01	20	197	143	S	1674923	Thermococcus sp. 2319x1
1	0	1	29	29	S1	579137	Methanocaldococcus vulcanius M7		15	0.01	15	184	145	S	122420	Thermococcus sp. P6		15	0.01	15	184	145	S	122420	Thermococcus sp. P6
1	0	1	27	25	S	1301915	Methanocaldococcus bathoardescens		5	0	5	75	60	S	246969	Thermococcus sp. AM4		5	0	5	75	60	S	246969	Thermococcus sp. AM4
1	0	1	18	17	S	2546128	Methanocaldococcus lauensis		5	0	5	55	50	S	3111325	Thermococcus sp. SY098		5	0	5	55	50	S	3111325	Thermococcus sp. SY098
1	0	0	7	7	G1	2641196	unclassified Methanocaldococcus		1	0	1	18	16	S	1042877	Thermococcus sp. 4557		1	0	1	18	16	S	1042877	Thermococcus sp. 4557
1	0	1	7	7	S	644281	Methanocaldococcus sp. FS406-22		0	0	0	26	22	S	2008440	Thermococcus sp. 5-4		0	0	0	26	22	S	2008440	Thermococcus sp. 5-4
0	0	0	12	12	S	83171	Methanocaldococcus fervens		21	0.01	0	308	168	S	172049	Thermococcus sibiricus		21	0.01	0	308	168	S	172049	Thermococcus sibiricus
0	0	0	12	12	S1	573064	Methanocaldococcus fervens AG86		21	0.01	21	308	168	S1	604354	Thermococcus sibiricus MM 739		21	0.01	21	308	168	S1	604354	Thermococcus sibiricus MM 739
2	0	0	63	33	G	196119	Methanotorris		17	0.01	0	173	149	S	2264	Thermococcus celer		17	0.01	0	173	149	S	2264	Thermococcus celer
2	0	0	63	33	S	2189	Methanotorris igneus		17	0.01	17	173	149	S1	1293037	Thermococcus celer Vu 13 = JCM 8558		17	0.01	17	173	149	S1	1293037	Thermococcus celer Vu 13 = JCM 8558
2	0	2	63	33	S1	880724	Methanotorris igneus Kol 5		16	0.01	16	107	57	S	195522	Thermococcus nautili		16	0.01	16	107	57	S	195522	Thermococcus nautili
7	0.01	0	138	133	F	2183	Methanococcaceae		13	0.01	13	137	98	S	110163	Thermococcus aggregans		13	0.01	13	137	98	S	110163	Thermococcus aggregans
4	0	0	88	85	G	2184	Methanococcus		12	0	12	157	126	S	2866384	Thermococcus argininiproducens		12	0	12	157	126	S	2866384	Thermococcus argininiproducens
2	0	1	42	39	S	39152	Methanococcus maripaludis		12	0	12	181	143	S	55802	Thermococcus barophilus		12	0	12	181	143	S	55802	Thermococcus barophilus
1	0	1	11	10	S1	402880	Methanococcus maripaludis C5		0	0	0	20	18	S1	391623	Thermococcus barophilus MP		0	0	0	20	18	S1	391623	Thermococcus barophilus MP
0	0	0	3	3	S1	267377	Methanococcus maripaludis S2		11	0	11	86	64	S	49899	Thermococcus profundus		11	0	11	86	64	S	49899	Thermococcus profundus
0	0	0	4	3	S1	637914	Methanococcus maripaludis KA1		10	0	0	71	54	S	110164	Thermococcus guaymasensis		10	0	0	71	54	S	110164	Thermococcus guaymasensis
0	0	0	0	0	S1	637915	Methanococcus maripaludis OS7		10	0	10	71	54	S1	1432656	Thermococcus guaymasensis DSM 11113		10	0	10	71	54	S1	1432656	Thermococcus guaymasensis DSM 11113
0	0	0	2	1	S1	1053692	Methanococcus maripaludis X1		9	0	9	79	72	S	54262	Thermococcus chitonophagus		9	0	9	79	72	S	54262	Thermococcus chitonophagus
1	0	0	17	17	S	2187	Methanococcus vannielii		8	0	0	108	81	S	2265	Thermococcus litoralis		8	0	0	108	81	S	2265	Thermococcus litoralis
1	0	1	17	17	S1	406327	Methanococcus vannielii SB		8	0	8	108	81	S1	523849	Thermococcus litoralis DSM 5473		8	0	8	108	81	S1	523849	Thermococcus litoralis DSM 5473
1	0	1	19	19	S	42879	Methanococcus aeolicus		7	0	7	101	72	S	71997	Thermococcus gorgonarius		7	0	7	101	72	S	71997	Thermococcus gorgonarius
0	0	0	1	1	S1	419665	Methanococcus aeolicus Nankai-3		6	0	6	65	51	S	163003	Thermococcus cleftensis		6	0	6	65	51	S	163003	Thermococcus cleftensis
3	0	1	49	47	G	155862	Methanothermococcus		6	0	6	101	78	S	582419	Thermococcus paralvinellae		6	0	6	101	78	S	582419	Thermococcus paralvinellae
1	0	0	24	22	S	2186	Methanothermococcus thermolithotrophicus		6	0	6	74	57	S	1712654	Thermococcus piezophilus		6	0	6	74	57	S	1712654	Thermococcus piezophilus
1	0	1	24	22	S1	523845	Methanothermococcus thermolithotrophicus DSM 2095		5	0	5	88	70	S	311400	Thermococcus kodakarensis		5	0	5	88	70	S	311400	Thermococcus kodakarensis
1	0	0	21	21	S	155863	Methanothermococcus okinawensis		0	0	0	0	0	S1	69014	Thermococcus kodakarensis KOD1		0	0	0	0	0	S1	69014	Thermococcus kodakarensis KOD1
1	0	1	21	21	S1	647113	Methanothermococcus okinawensis IH1		4	0	4	52	42	S	54077	Thermococcus barossii		4	0	4	52	42	S	54077	Thermococcus barossii
1	0	0	42	42	O1	114584	Methanococcales incertae sedis		4	0	4	76	56	S	53952	Thermococcus peptonophilus		4	0	4	76	56	S	53952	Thermococcus peptonophilus
1	0	0	42	42	G	2607661	Methanofervidicoccus		4	0	4	43	39	S	277988	Thermococcus thioreducens		4	0	4	43	39	S	277988	Thermococcus thioreducens
1	0	0	42	42	G1	2624956	unclassified Methanofervidicoccus		3	0	0	51	37	S	342948	Thermococcus onnurineus		3	0	0	51	37	S	342948	Thermococcus onnurineus
1	0	1	42	42	S	2607662	Methanofervidicoccus sp. A16		3	0	3	51	37	S1	523850	Thermococcus onnurineus NA1		3	0	3	51	37	S1	523850	Thermococcus onnurineus NA1
11	0.01	0	85	64	C	183988	Methanopyri		3	0	3	47	36	S	2016373	Thermococcus camini		3	0	3	47	36	S	2016373	Thermococcus camini
11	0.01	0	85	64	O	68985	Methanopyrales		2	0	2	47	38	S	72803	Thermococcus siculi		2	0	2	47	38	S	72803	Thermococcus siculi
11	0.01	0	85	64	F	183713	Methanopyraceae		2	0	2	61	51	S	71998	Thermococcus pacificus		2	0	2	61	51	S	71998	Thermococcus pacificus
11	0.01	11	85	64	G	2319	Methanopyrus		2	0	2	44	32	S	1505907	Thermococcus eurythermalis		2	0	2	44	32	S	1505907	Thermococcus eurythermalis
0	0	0	15	14	S	2320	Methanopyrus kandleri		2	0	2	41	25	S	2586643	Thermococcus indicus		2	0	2	41	25	S	2586643	Thermococcus indicus
0	0	0	15	14	S1	190192	Methanopyrus kandleri AV19		1	0	1	40	32	S	2969672	Thermococcus thermotolerans		1	0	1	40	32	S	2969672	Thermococcus thermotolerans
0	0	0	10	10	G1	2684913	unclassified Methanopyrus		1	0	1	52	47	S	2016361	Thermococcus henrietii		1	0	1	52	47	S	2016361	Thermococcus henrietii
0	0	0	2	2	S	1937004	Methanopyrus sp. KOL6		1	0	1	18	15	S	187880	Thermococcus radiotolerans		1	0	1	18	15	S	187880	Thermococcus radiotolerans
0	0	0	1	1	S	1937005	Methanopyrus sp. SNP6		1	0	0	53	47	S	187878	Thermococcus gammatolerans		1	0	0	53	47	S	187878	Thermococcus gammatolerans
54	0.06	0	956	790	C	183980	Archaeoglobi		1	0	1	53	47	S1	593117	Thermococcus gammatolerans EJ3		1	0	1	53	47	S1	593117	Thermococcus gammatolerans EJ3
54	0.06	0	956	790	O	2231	Archaeoglobales		0	0	0	26	22	S	2598455	Thermococcus aciditolerans		0	0	0	26	22	S	2598455	Thermococcus aciditolerans
54	0.06	3	956	790	F	2232	Archaeoglobaceae		82	0.03	12	1321	1049	G	2260	Pyrococcus		82	0.03	12	1321	1049	G	2260	Pyrococcus
31	0.03	9	503	397	G	2233	Archaeoglobus		23	0.01	0	309	254	G1	2629106	unclassified Pyrococcus		23	0.01	0	309	254	G1	2629106	unclassified Pyrococcus
11	0.01	11	191	161	S	2234	Archaeoglobus fulgidus		13	0.01	13	122	100	S	1183377	Pyrococcus sp. ST04		13	0.01	13	122	100	S	1183377	Pyrococcus sp. ST04
0	0	0	11	11	S1	224325	Archaeoglobus fulgidus DSM 4304		10	0	10	181	149	S	342949	Pyrococcus sp. NA2		10	0	10	181	149	S	342949	Pyrococcus sp. NA2
0	0	0	13	13	S1	1344584	Archaeoglobus fulgidus DSM 8774		12	0	11	197	156	S	2261	Pyrococcus furiosus		12	0	11	197	156	S	2261	Pyrococcus furiosus
6	0.01	0	142	102	S	84156	Archaeoglobus profundus		1	0	1	1	1	S1	186497	Pyrococcus furiosus DSM 3638		1	0	1	1	1	S1	186497	Pyrococcus furiosus DSM 3638
6	0.01	6	142	102	S1	572546	Archaeoglobus profundus DSM 5631		0	0	0	0	0	S1	1185654	Pyrococcus furiosus COM1		0	0	0	0	0	S1	1185654	Pyrococcus furiosus COM1
3	0	0	64	56	S	1316941	Archaeoglobus sulfaticallidus		10	0	0	156	126	S	53953	Pyrococcus horikoshii		10	0	0	156	126	S	53953	Pyrococcus horikoshii
3	0	3	64	56	S1	387631	Archaeoglobus sulfaticallidus PM70-1		10	0	10	156	126	S1	70601	Pyrococcus horikoshii OT3		10	0	10	156	126	S1	70601	Pyrococcus horikoshii OT3
2	0	0	48	44	S	58290	Archaeoglobus veneficus		10	0	0	201	150	S	1008460	Pyrococcus yayanosii		10	0	0	201	150	S	1008460	Pyrococcus yayanosii
2	0	2	48	44	S1	693661	Archaeoglobus veneficus SNP6		10	0	10	201	150	S1	529709	Pyrococcus yayanosii CH1		10	0	10	201	150	S1	529709	Pyrococcus yayanosii CH1
11	0.01	0	197	167	G	190818	Geoglobus		9	0	0	131	112	S	29292	Pyrococcus abyssi		9	0	0	131	112	S	29292	Pyrococcus abyssi
6	0.01	6	138	113	S	565033	Geoglobus acetivorans		9	0	9	131	112	S1	272844	Pyrococcus abyssi GE5		9	0	9	131	112	S1	272844	Pyrococcus abyssi GE5
5	0.01	5	46	42	S	113653	Geoglobus ahangari		6	0	6	121	88	S	1609559	Pyrococcus kukulkanii		6	0	6	121	88	S	1609559	Pyrococcus kukulkanii
9	0.01	0	139	119	G	54260	Ferroglobus		8	0	0	159	137	G	83867	Palaeococcus		8	0	0	159	137	G	83867	Palaeococcus
9	0.01	0	139	119	S	54261	Ferroglobus placidus		8	0	0	159	137	S	971279	Palaeococcus pacificus		8	0	0	159	137	S	971279	Palaeococcus pacificus
9	0.01	9	139	119	S1	589924	Ferroglobus placidus DSM 10642		8	0	8	159	137	S1	1343739	Palaeococcus pacificus DY20341		8	0	8	159	137	S1	1343739	Palaeococcus pacificus DY20341
4	0	0	107	80	C	2545688	Candidatus Methanoliparia		50	0.02	0	937	637	C	2545688	Candidatus Methanoliparia		50	0.02	0	937	637	C	2545688	Candidatus Methanoliparia
4	0	0	107	80	O	2545689	Candidatus Methanoliparales		50	0.02	0	937	637	O	2545689	Candidatus Methanoliparales		50	0.02	0	937	637	O	2545689	Candidatus Methanoliparales
4	0	0	107	80	F	2545690	Candidatus Methanoliparaceae		50	0.02	0	937	637	F	2545690	Candidatus Methanoliparaceae		50	0.02	0	937	637	F	2545690	Candidatus Methanoliparaceae
4	0	0	107	80	G	2545692	Candidatus Methanoliparum		50	0.02	0	937	637	G	2545692	Candidatus Methanoliparum		50	0.02	0	937	637	G	2545692	Candidatus Methanoliparum
4	0	0	107	80	G1	2874847	unclassified Candidatus Methanoliparum		50	0.02	0	937	637	G1	2874847	unclassified Candidatus Methanoliparum		50	0.02	0	937	637	G1	2874847	unclassified Candidatus Methanoliparum
4	0	4	107	80	S	2874846	Candidatus Methanoliparum sp. LAM-1		50	0.02	50	937	637	S	2874846	Candidatus Methanoliparum sp. LAM-1		50	0.02	50	937	637	S	2874846	Candidatus Methanoliparum sp. LAM-1
0	0	0	58	52	C	171536	Methanonatronarchaeia		35	0.01	0	545	413	C	171536	Methanonatronarchaeia		35	0.01	0	545	413	C	171536	Methanonatronarchaeia
0	0	0	58	52	O	2202723	Methanonatronarchaeales		35	0.01	0	545	413	O	2202723	Methanonatronarchaeales		35	0.01	0	545	413	O	2202723	Methanonatronarchaeales
0	0	0	58	52	F	2202724	Methanonatronarchaeaceae		35	0.01	0	545	413	F	2202724	Methanonatronarchaeaceae		35	0.01	0	545	413	F	2202724	Methanonatronarchaeaceae
0	0	0	58	52	G	2022711	Methanonatronarchaeum		35	0.01	0	545	413	G	2022711	Methanonatronarchaeum		35	0.01	0	545	413	G	2022711	Methanonatronarchaeum
0	0	0	58	52	G1	2633079	unclassified Methanonatronarchaeum		35	0.01	17	545	413	G1	2633079	unclassified Methanonatronarchaeum		35	0.01	17	545	413	G1	2633079	unclassified Methanonatronarchaeum
0	0	0	28	24	S	2933293	Methanonatronarchaeum sp. AMET6-2		9	0	9	169	120	S	2933293	Methanonatronarchaeum sp. AMET6-2		9	0	9	169	120	S	2933293	Methanonatronarchaeum sp. AMET6-2
0	0	0	14	13	S	3037654	Methanonatronarchaeum sp. AMET-Sl		9	0	9	178	146	S	3037654	Methanonatronarchaeum sp. AMET-Sl		9	0	9	178	146	S	3037654	Methanonatronarchaeum sp. AMET-Sl
59	0.06	0	482	445	D1	1783276	DPANN group		197	0.08	3	4192	3117	P	2283796	Candidatus Thermoplasmatota		197	0.08	3	4192	3117	P	2283796	Candidatus Thermoplasmatota
50	0.06	0	316	311	P	192989	Nanoarchaeota		140	0.06	2	2933	2193	C	183967	Thermoplasmata		140	0.06	2	2933	2193	C	183967	Thermoplasmata
50	0.06	0	316	311	C	2974821	Nanobdellia		91	0.04	16	1970	1465	O	2301	Thermoplasmatales		91	0.04	16	1970	1465	O	2301	Thermoplasmatales
50	0.06	0	316	311	O	2974822	Nanobdellales		28	0.01	0	567	409	F	46659	Thermoplasmataceae		28	0.01	0	567	409	F	46659	Thermoplasmataceae
50	0.06	0	316	311	F	2974823	Nanobdellaceae		28	0.01	5	567	409	G	2302	Thermoplasma		28	0.01	5	567	409	G	2302	Thermoplasma
50	0.06	0	316	311	G	2974824	Nanobdella		15	0.01	0	209	156	S	2303	Thermoplasma acidophilum		15	0.01	0	209	156	S	2303	Thermoplasma acidophilum
50	0.06	50	316	311	S	2586965	Nanobdella aerobiophila		15	0.01	15	209	156	S1	273075	Thermoplasma acidophilum DSM 1728		15	0.01	15	209	156	S1	273075	Thermoplasma acidophilum DSM 1728
5	0.01	2	75	60	P	1462430	Candidatus Nanohalarchaeota		8	0	0	210	157	S	50339	Thermoplasma volcanium		8	0	0	210	157	S	50339	Thermoplasma volcanium
3	0	0	41	36	P1	2856064	Candidatus Nanohalarchaeota incertae sedis		8	0	8	210	157	S1	273116	Thermoplasma volcanium GSS1		8	0	8	210	157	S1	273116	Thermoplasma volcanium GSS1
2	0	0	16	16	G	3157592	Candidatus Nanohalococcus		27	0.01	2	663	480	F	90142	Ferroplasmaceae		27	0.01	2	663	480	F	90142	Ferroplasmaceae
2	0	2	16	16	S	2978047	Candidatus Nanohalococcus occultus		19	0.01	6	439	306	G	74968	Ferroplasma		19	0.01	6	439	306	G	74968	Ferroplasma
1	0	0	23	18	G	3157591	Candidatus Nanohalovita		12	0	0	129	101	G1	2647981	unclassified Ferroplasma		12	0	0	129	101	G1	2647981	unclassified Ferroplasma
1	0	1	23	18	S	2978046	Candidatus Nanohalovita haloferacivicina		12	0	12	129	101	S	2591003	Ferroplasma sp.		12	0	12	129	101	S	2591003	Ferroplasma sp.
0	0	0	19	12	C	2856052	Candidatus Nanohalobia		1	0	1	93	55	S	74969	Ferroplasma acidiphilum		1	0	1	93	55	S	74969	Ferroplasma acidiphilum
0	0	0	19	12	O	2856053	Candidatus Nanohalobiales		0	0	0	21	17	S	97393	Ferroplasma acidarmanus		0	0	0	21	17	S	97393	Ferroplasma acidarmanus
0	0	0	19	12	F	2856054	Candidatus Nanohalobiaceae		0	0	0	21	17	S1	333146	Ferroplasma acidarmanus Fer1		0	0	0	21	17	S1	333146	Ferroplasma acidarmanus Fer1
0	0	0	19	12	G	2856051	Candidatus Nanohalobium		6	0	0	176	136	G	507753	Acidiplasma		6	0	0	176	136	G	507753	Acidiplasma
0	0	0	19	12	S	2565781	Candidatus Nanohalobium constans		6	0	0	176	136	G1	2641301	unclassified Acidiplasma		6	0	0	176	136	G1	2641301	unclassified Acidiplasma
4	0	0	89	73	P	1801631	Candidatus Micrarchaeota		6	0	6	176	136	S	1872114	Acidiplasma sp.		6	0	6	176	136	S	1872114	Acidiplasma sp.
2	0	0	35	25	G	2490204	Candidatus Mancarchaeum		13	0.01	0	225	185	F	46630	Picrophilaceae		13	0.01	0	225	185	F	46630	Picrophilaceae
2	0	2	35	25	S	1920749	Candidatus Mancarchaeum acidiphilum		13	0.01	0	225	185	G	46631	Picrophilus		13	0.01	0	225	185	G	46631	Picrophilus
2	0	0	48	43	C	2885733	Candidatus Micrarchaeia		13	0.01	0	225	185	S	46632	Picrophilus oshimae		13	0.01	0	225	185	S	46632	Picrophilus oshimae
2	0	0	48	43	O	2885734	Candidatus Micrarchaeales		13	0.01	13	225	185	S1	1122961	Picrophilus oshimae DSM 9789		13	0.01	13	225	185	S1	1122961	Picrophilus oshimae DSM 9789
2	0	0	48	43	F	2885735	Candidatus Micrarchaeaceae		7	0	0	267	217	F	1747776	Cuniculiplasmataceae		7	0	0	267	217	F	1747776	Cuniculiplasmataceae
2	0	0	48	43	G	662756	Candidatus Micrarchaeum		7	0	0	267	217	G	1747777	Cuniculiplasma		7	0	0	267	217	G	1747777	Cuniculiplasma
2	0	0	48	43	G1	2621513	unclassified Candidatus Micrarchaeum		7	0	7	267	217	S	1673428	Cuniculiplasma divulgatum		7	0	7	267	217	S	1673428	Cuniculiplasma divulgatum
2	0	2	48	43	S	2282148	Candidatus Micrarchaeum sp.		47	0.02	5	946	712	O	1235850	Methanomassiliicoccales		47	0.02	5	946	712	O	1235850	Methanomassiliicoccales
25	0.03	2	699	601	P	2283796	Candidatus Thermoplasmatota		36	0.01	1	681	502	F	1577788	Methanomassiliicoccaceae		36	0.01	1	681	502	F	1577788	Methanomassiliicoccaceae
16	0.02	0	559	470	C	183967	Thermoplasmata		23	0.01	0	443	321	G	1080709	Methanomassiliicoccus		23	0.01	0	443	321	G	1080709	Methanomassiliicoccus
13	0.01	1	470	391	O	2301	Thermoplasmatales		23	0.01	23	443	321	S	1406512	Candidatus Methanomassiliicoccus intestinalis		23	0.01	23	443	321	S	1406512	Candidatus Methanomassiliicoccus intestinalis
6	0.01	0	145	123	F	90142	Ferroplasmaceae		0	0	0	0	0	S1	1295009	Candidatus Methanomassiliicoccus intestinalis Issoire-Mx1		0	0	0	0	0	S1	1295009	Candidatus Methanomassiliicoccus intestinalis Issoire-Mx1
4	0	2	94	80	G	74968	Ferroplasma		12	0	0	217	160	G	1607807	Candidatus Methanoplasma		12	0	0	217	160	G	1607807	Candidatus Methanoplasma
2	0	0	31	27	G1	2647981	unclassified Ferroplasma		12	0	12	217	160	S	1577791	Candidatus Methanoplasma termitum		12	0	12	217	160	S	1577791	Candidatus Methanoplasma termitum
2	0	2	31	27	S	2591003	Ferroplasma sp.		6	0	0	178	147	F	2517203	Methanomethylophilaceae		6	0	0	178	147	F	2517203	Methanomethylophilaceae
0	0	0	13	11	S	74969	Ferroplasma acidiphilum		6	0	0	178	147	G	1291539	Methanomethylophilus		6	0	0	178	147	G	1291539	Methanomethylophilus
0	0	0	2	1	S	97393	Ferroplasma acidarmanus		6	0	6	178	147	S	1291540	Methanomethylophilus alvi		6	0	6	178	147	S	1291540	Methanomethylophilus alvi
0	0	0	2	1	S1	333146	Ferroplasma acidarmanus Fer1		0	0	0	0	0	S1	1236689	Candidatus Methanomethylophilus alvi Mx1201		0	0	0	0	0	S1	1236689	Candidatus Methanomethylophilus alvi Mx1201
2	0	0	47	39	G	507753	Acidiplasma		54	0.02	0	1143	847	P1	1803510	DHVE2 group		54	0.02	0	1143	847	P1	1803510	DHVE2 group
2	0	0	47	39	G1	2641301	unclassified Acidiplasma		54	0.02	18	1143	847	G	379546	Candidatus Aciduliprofundum		54	0.02	18	1143	847	G	379546	Candidatus Aciduliprofundum
2	0	2	47	39	S	1872114	Acidiplasma sp.		19	0.01	0	348	260	G1	2633939	unclassified Aciduliprofundum		19	0.01	0	348	260	G1	2633939	unclassified Aciduliprofundum
5	0.01	0	163	129	F	46659	Thermoplasmataceae		19	0.01	19	348	260	S	673860	Aciduliprofundum sp. MAR08-339		19	0.01	19	348	260	S	673860	Aciduliprofundum sp. MAR08-339
5	0.01	2	163	129	G	2302	Thermoplasma		17	0.01	0	397	301	S	379547	Candidatus Aciduliprofundum boonei		17	0.01	0	397	301	S	379547	Candidatus Aciduliprofundum boonei
2	0	0	72	53	S	50339	Thermoplasma volcanium		17	0.01	17	397	301	S1	439481	Aciduliprofundum boonei T469		17	0.01	17	397	301	S1	439481	Aciduliprofundum boonei T469
2	0	2	72	53	S1	273116	Thermoplasma volcanium GSS1		69	0.03	0	1141	852	D1	1783276	DPANN group		69	0.03	0	1141	852	D1	1783276	DPANN group
1	0	0	52	40	S	2303	Thermoplasma acidophilum		29	0.01	2	463	340	P	1801631	Candidatus Micrarchaeota		29	0.01	2	463	340	P	1801631	Candidatus Micrarchaeota
1	0	1	52	40	S1	273075	Thermoplasma acidophilum DSM 1728		15	0.01	0	203	156	C	2885733	Candidatus Micrarchaeia		15	0.01	0	203	156	C	2885733	Candidatus Micrarchaeia
1	0	0	52	45	F	46630	Picrophilaceae		15	0.01	0	203	156	O	2885734	Candidatus Micrarchaeales		15	0.01	0	203	156	O	2885734	Candidatus Micrarchaeales
1	0	0	52	45	G	46631	Picrophilus		15	0.01	0	203	156	F	2885735	Candidatus Micrarchaeaceae		15	0.01	0	203	156	F	2885735	Candidatus Micrarchaeaceae
1	0	0	52	45	S	46632	Picrophilus oshimae		15	0.01	0	203	156	G	662756	Candidatus Micrarchaeum		15	0.01	0	203	156	G	662756	Candidatus Micrarchaeum
1	0	1	52	45	S1	1122961	Picrophilus oshimae DSM 9789		15	0.01	0	203	156	G1	2621513	unclassified Candidatus Micrarchaeum		15	0.01	0	203	156	G1	2621513	unclassified Candidatus Micrarchaeum
0	0	0	68	56	F	1747776	Cuniculiplasmataceae		15	0.01	15	203	156	S	2282148	Candidatus Micrarchaeum sp.		15	0.01	15	203	156	S	2282148	Candidatus Micrarchaeum sp.
0	0	0	68	56	G	1747777	Cuniculiplasma		12	0	0	216	150	G	2490204	Candidatus Mancarchaeum		12	0	0	216	150	G	2490204	Candidatus Mancarchaeum
0	0	0	68	56	S	1673428	Cuniculiplasma divulgatum		12	0	12	216	150	S	1920749	Candidatus Mancarchaeum acidiphilum		12	0	12	216	150	S	1920749	Candidatus Mancarchaeum acidiphilum
3	0	0	88	78	O	1235850	Methanomassiliicoccales		20	0.01	0	255	194	P	192989	Nanoarchaeota		20	0.01	0	255	194	P	192989	Nanoarchaeota
2	0	0	65	57	F	1577788	Methanomassiliicoccaceae		20	0.01	0	255	194	C	2974821	Nanobdellia		20	0.01	0	255	194	C	2974821	Nanobdellia
2	0	0	28	26	G	1607807	Candidatus Methanoplasma		20	0.01	0	255	194	O	2974822	Nanobdellales		20	0.01	0	255	194	O	2974822	Nanobdellales
2	0	2	28	26	S	1577791	Candidatus Methanoplasma termitum		20	0.01	0	255	194	F	2974823	Nanobdellaceae		20	0.01	0	255	194	F	2974823	Nanobdellaceae
0	0	0	37	31	G	1080709	Methanomassiliicoccus		20	0.01	0	255	194	G	2974824	Nanobdella		20	0.01	0	255	194	G	2974824	Nanobdella
0	0	0	37	31	S	1406512	Candidatus Methanomassiliicoccus intestinalis		20	0.01	20	255	194	S	2586965	Nanobdella aerobiophila		20	0.01	20	255	194	S	2586965	Nanobdella aerobiophila
0	0	0	0	0	S1	1295009	Candidatus Methanomassiliicoccus intestinalis Issoire-Mx1		20	0.01	3	416	314	P	1462430	Candidatus Nanohalarchaeota		20	0.01	3	416	314	P	1462430	Candidatus Nanohalarchaeota
1	0	0	19	17	F	2517203	Methanomethylophilaceae		16	0.01	5	215	172	P1	2856064	Candidatus Nanohalarchaeota incertae sedis		16	0.01	5	215	172	P1	2856064	Candidatus Nanohalarchaeota incertae sedis
1	0	0	19	17	G	1291539	Methanomethylophilus		8	0	0	101	82	G	3157592	Candidatus Nanohalococcus		8	0	0	101	82	G	3157592	Candidatus Nanohalococcus
1	0	1	19	17	S	1291540	Methanomethylophilus alvi		8	0	8	101	82	S	2978047	Candidatus Nanohalococcus occultus		8	0	8	101	82	S	2978047	Candidatus Nanohalococcus occultus
0	0	0	0	0	S1	1236689	Candidatus Methanomethylophilus alvi Mx1201		3	0	0	95	76	G	3157591	Candidatus Nanohalovita		3	0	0	95	76	G	3157591	Candidatus Nanohalovita
7	0.01	0	135	126	P1	1803510	DHVE2 group		3	0	3	95	76	S	2978046	Candidatus Nanohalovita haloferacivicina		3	0	3	95	76	S	2978046	Candidatus Nanohalovita haloferacivicina
7	0.01	2	135	126	G	379546	Candidatus Aciduliprofundum		1	0	0	84	64	C	2856052	Candidatus Nanohalobia		1	0	0	84	64	C	2856052	Candidatus Nanohalobia
3	0	0	52	46	S	379547	Candidatus Aciduliprofundum boonei		1	0	0	84	64	O	2856053	Candidatus Nanohalobiales		1	0	0	84	64	O	2856053	Candidatus Nanohalobiales
3	0	3	52	46	S1	439481	Aciduliprofundum boonei T469		1	0	0	84	64	F	2856054	Candidatus Nanohalobiaceae		1	0	0	84	64	F	2856054	Candidatus Nanohalobiaceae
2	0	0	34	33	G1	2633939	unclassified Aciduliprofundum		1	0	0	84	64	G	2856051	Candidatus Nanohalobium		1	0	0	84	64	G	2856051	Candidatus Nanohalobium
2	0	2	34	33	S	673860	Aciduliprofundum sp. MAR08-339		1	0	1	84	64	S	2565781	Candidatus Nanohalobium constans		1	0	1	84	64	S	2565781	Candidatus Nanohalobium constans
3	0	0	97	75	D1	1935183	Asgard group		34	0.01	0	722	461	D1	1935183	Asgard group		34	0.01	0	722	461	D1	1935183	Asgard group
3	0	0	97	75	P	1655434	Candidatus Lokiarchaeota		34	0.01	0	722	461	P	1655434	Candidatus Lokiarchaeota		34	0.01	0	722	461	P	1655434	Candidatus Lokiarchaeota
3	0	0	97	75	C	3049162	Candidatus Lokiarchaeia		34	0.01	0	722	461	C	3049162	Candidatus Lokiarchaeia		34	0.01	0	722	461	C	3049162	Candidatus Lokiarchaeia
3	0	0	97	75	O	3049163	Candidatus Prometheoarchaeales		34	0.01	0	722	461	O	3049163	Candidatus Prometheoarchaeales		34	0.01	0	722	461	O	3049163	Candidatus Prometheoarchaeales
3	0	0	97	75	F	3049164	Candidatus Prometheoarchaeaceae		34	0.01	0	722	461	F	3049164	Candidatus Prometheoarchaeaceae		34	0.01	0	722	461	F	3049164	Candidatus Prometheoarchaeaceae
3	0	0	97	75	G	2732160	Candidatus Prometheoarchaeum		34	0.01	0	722	461	G	2732160	Candidatus Prometheoarchaeum		34	0.01	0	722	461	G	2732160	Candidatus Prometheoarchaeum
3	0	3	97	75	S	2594042	Candidatus Prometheoarchaeum syntrophicum		34	0.01	34	722	461	S	2594042	Candidatus Prometheoarchaeum syntrophicum		34	0.01	34	722	461	S	2594042	Candidatus Prometheoarchaeum syntrophicum
42640	46.92	3425	2170398	1203066	D	2	Bacteria		146761	59.68	18933	5236898	3609747	D	2	Bacteria		145663	59.23	18933	5236898	3609747	D	2	Bacteria
23986	26.4	0	1181057	396729	D1	2323	Bacteria incertae sedis		50036	20.35	3152	1543763	1249635	D1	1783272	Terrabacteria group		50036	20.35	3152	1543763	1249635	D1	1783272	Terrabacteria group
23986	26.4	0	1181057	396729	D2	1783234	Bacteria candidate phyla		17203	7	1280	256954	210378	P	1239	Bacillota		17203	7	1280	256954	210378	P	1239	Bacillota
23959	26.37	0	1180700	396526	P	1383058	Candidatus Fervidibacterota		8258	3.36	248	119838	101362	C	91061	Bacilli		8258	3.36	248	119838	101362	C	91061	Bacilli
23959	26.37	0	1180700	396526	G	1448928	Candidatus Fervidibacter		6398	2.6	515	89851	75873	O	1385	Bacillales		6398	2.6	515	89851	75873	O	1385	Bacillales
23959	26.37	23959	1180700	396526	S	1448929	Candidatus Fervidibacter sacchari		2880	1.17	347	38055	32245	F	186817	Bacillaceae		2880	1.17	347	38055	32245	F	186817	Bacillaceae
17	0.02	0	113	107	P	67810	Candidatus Bipolaricaulota		789	0.32	192	9080	7716	G	1386	Bacillus		789	0.32	192	9080	7716	G	1386	Bacillus
17	0.02	0	113	107	C	3121607	Candidatus Bipolaricaulia		225	0.09	56	2369	2030	G1	86661	Bacillus cereus group		225	0.09	56	2369	2030	G1	86661	Bacillus cereus group
17	0.02	0	113	107	O	3121608	Candidatus Bipolaricaulales		44	0.02	38	449	400	S	1396	Bacillus cereus		44	0.02	38	449	400	S	1396	Bacillus cereus
17	0.02	0	113	107	F	3121609	Candidatus Bipolaricaulaceae		4	0	4	9	3	S1	526974	Bacillus cereus BDRD-ST24		4	0	4	9	3	S1	526974	Bacillus cereus BDRD-ST24
17	0.02	0	113	107	G	2250122	Candidatus Bipolaricaulis		1	0	1	6	5	S1	405531	Bacillus cereus G9842		1	0	1	6	5	S1	405531	Bacillus cereus G9842
17	0.02	17	113	107	S	2026885	Candidatus Bipolaricaulis anaerobius		1	0	1	3	3	S1	526989	Bacillus cereus F65185		1	0	1	3	3	S1	526989	Bacillus cereus F65185
4	0	0	45	44	P	95818	Candidatus Saccharibacteria		0	0	0	0	0	S1	526978	Bacillus cereus BDRD-Cer4		0	0	0	0	0	S1	526978	Bacillus cereus BDRD-Cer4
3	0	0	26	26	C	2093818	Candidatus Saccharimonadia		0	0	0	0	0	S1	1454382	Bacillus cereus D17		0	0	0	0	0	S1	1454382	Bacillus cereus D17
2	0	0	6	6	O	2093825	Candidatus Saccharimonadales		0	0	0	1	1	S1	1179100	Bacillus cereus biovar anthracis		0	0	0	1	1	S1	1179100	Bacillus cereus biovar anthracis
2	0	0	6	6	F	2171986	Candidatus Saccharimonadaceae		0	0	0	1	1	S2	637380	Bacillus cereus biovar anthracis str. CI		0	0	0	1	1	S2	637380	Bacillus cereus biovar anthracis str. CI
2	0	0	6	6	G	1331051	Candidatus Saccharimonas		0	0	0	3	2	S1	1003239	Bacillus cereus C1L		0	0	0	3	2	S1	1003239	Bacillus cereus C1L
2	0	2	6	6	S	1332188	Candidatus Saccharimonas aalborgensis		0	0	0	0	0	S1	572264	Bacillus cereus 03BB102		0	0	0	0	0	S1	572264	Bacillus cereus 03BB102
1	0	0	17	17	O	2093819	Candidatus Nanosynbacterales		0	0	0	0	0	S1	526991	Bacillus cereus AH676		0	0	0	0	0	S1	526991	Bacillus cereus AH676
1	0	0	17	17	F	2093822	Candidatus Nanosynbacteraceae		0	0	0	3	3	S1	526987	Bacillus cereus Rock4-2		0	0	0	3	3	S1	526987	Bacillus cereus Rock4-2
1	0	0	17	17	G	2093823	Candidatus Nanosynbacter		0	0	0	2	2	S1	526982	Bacillus cereus Rock1-15		0	0	0	2	2	S1	526982	Bacillus cereus Rock1-15
1	0	1	5	5	S	2572088	Candidatus Nanosynbacter featherlites		0	0	0	7	7	S1	526980	Bacillus cereus ATCC 10876		0	0	0	7	7	S1	526980	Bacillus cereus ATCC 10876
0	0	0	9	9	S	2093824	Candidatus Nanosynbacter lyticus		0	0	0	1	1	S1	526979	Bacillus cereus 95/8201		0	0	0	1	1	S1	526979	Bacillus cereus 95/8201
0	0	0	3	3	G1	2725944	unclassified Candidatus Nanosynbacter		0	0	0	0	0	S1	226900	Bacillus cereus ATCC 14579		0	0	0	0	0	S1	226900	Bacillus cereus ATCC 14579
0	0	0	3	3	S	2899133	Candidatus Nanosynbacter sp. HMT-352		0	0	0	7	5	S1	526970	Bacillus cereus BGSC 6E1		0	0	0	7	5	S1	526970	Bacillus cereus BGSC 6E1
1	0	0	1	1	G	2905967	Candidatus Minimicrobia		0	0	0	4	4	S1	526969	Bacillus cereus m1550		0	0	0	4	4	S1	526969	Bacillus cereus m1550
1	0	0	1	1	G1	2986071	unclassified Candidatus Minimicrobia		0	0	0	2	2	S1	526967	Bacillus cereus 172560W		0	0	0	2	2	S1	526967	Bacillus cereus 172560W
1	0	1	1	1	S	3118470	Candidatus Minimicrobia sp. QA0096		0	0	0	0	0	S1	451709	Bacillus cereus 03BB108		0	0	0	0	0	S1	451709	Bacillus cereus 03BB108
0	0	0	0	0	S	2841264	Candidatus Minimicrobia vallesae		0	0	0	8	3	S1	405535	Bacillus cereus AH820		0	0	0	8	3	S1	405535	Bacillus cereus AH820
0	0	0	8	7	G	2831665	Candidatus Mycosynbacter		0	0	0	0	0	S1	405532	Bacillus cereus B4264		0	0	0	0	0	S1	405532	Bacillus cereus B4264
0	0	0	8	7	S	2665156	Candidatus Mycosynbacter amalyticus		0	0	0	1	1	S1	347495	Bacillus cereus F837/76		0	0	0	1	1	S1	347495	Bacillus cereus F837/76
3	0	0	25	25	P	221235	Candidatus Absconditabacteria		0	0	0	0	0	S1	288681	Bacillus cereus E33L		0	0	0	0	0	S1	288681	Bacillus cereus E33L
3	0	0	25	25	O	2900568	Candidatus Absconditabacterales		34	0.01	17	363	318	S	1428	Bacillus thuringiensis		34	0.01	17	363	318	S	1428	Bacillus thuringiensis
3	0	0	25	25	F	2900569	Candidatus Absconditicoccaceae		4	0	4	14	12	S1	1218175	Bacillus thuringiensis HD-771		4	0	4	14	12	S1	1218175	Bacillus thuringiensis HD-771
3	0	0	25	25	G	2900570	Candidatus Absconditicoccus		2	0	2	13	10	S1	527019	Bacillus thuringiensis IBL 200		2	0	2	13	10	S1	527019	Bacillus thuringiensis IBL 200
3	0	3	25	25	S	2735562	Candidatus Absconditicoccus praedator		2	0	2	17	16	S1	527021	Bacillus thuringiensis Bt407		2	0	2	17	16	S1	527021	Bacillus thuringiensis Bt407
2	0	0	44	43	D3	95901	Candidatus Dependentiae		2	0	2	7	6	S1	1442	Bacillus thuringiensis serovar tolworthi		2	0	2	7	6	S1	1442	Bacillus thuringiensis serovar tolworthi
2	0	0	44	43	C	2497643	Candidatus Babeliae		1	0	1	5	5	S1	180850	Bacillus thuringiensis serovar indiana		1	0	1	5	5	S1	180850	Bacillus thuringiensis serovar indiana
2	0	1	44	43	O	2497644	Candidatus Babeliales		1	0	1	30	21	S1	257985	Bacillus thuringiensis serovar andalousiensis		1	0	1	30	21	S1	257985	Bacillus thuringiensis serovar andalousiensis
1	0	0	31	30	F	2497645	Candidatus Babeliaceae		0	0	0	9	9	S2	527032	Bacillus thuringiensis serovar andalousiensis BGSC 4AW1		0	0	0	9	9	S2	527032	Bacillus thuringiensis serovar andalousiensis BGSC 4AW1
1	0	0	31	30	G	1551504	Candidatus Babela		1	0	1	9	9	S1	529122	Bacillus thuringiensis YBT-1518		1	0	1	9	9	S1	529122	Bacillus thuringiensis YBT-1518
1	0	1	31	30	S	673862	Candidatus Babela massiliensis		1	0	0	7	7	S1	180869	Bacillus thuringiensis serovar pakistani		1	0	0	7	7	S1	180869	Bacillus thuringiensis serovar pakistani
0	0	0	11	11	F	2953756	Candidatus Chromulinivoraceae		1	0	1	7	7	S2	527027	Bacillus thuringiensis serovar pakistani str. T13001		1	0	1	7	7	S2	527027	Bacillus thuringiensis serovar pakistani str. T13001
0	0	0	11	11	G	2953757	Candidatus Chromulinivorax		1	0	0	10	9	S1	180854	Bacillus thuringiensis serovar huazhongensis		1	0	0	10	9	S1	180854	Bacillus thuringiensis serovar huazhongensis
0	0	0	11	11	S	2066483	Candidatus Chromulinivorax destructor		1	0	1	10	9	S2	527030	Bacillus thuringiensis serovar huazhongensis BGSC 4BD1		1	0	1	10	9	S2	527030	Bacillus thuringiensis serovar huazhongensis BGSC 4BD1
1	0	0	11	10	D3	1783273	Patescibacteria group		1	0	0	3	3	S1	29339	Bacillus thuringiensis serovar kurstaki		1	0	0	3	3	S1	29339	Bacillus thuringiensis serovar kurstaki
1	0	0	11	10	D4	1794810	Microgenomates group		1	0	1	1	1	S2	570416	Bacillus thuringiensis serovar kurstaki str. YBT-1520		1	0	1	1	1	S2	570416	Bacillus thuringiensis serovar kurstaki str. YBT-1520
1	0	0	11	10	D5	2715732	Microgenomates group incertae sedis		0	0	0	0	0	S2	527023	Bacillus thuringiensis serovar kurstaki str. T03a001		0	0	0	0	0	S2	527023	Bacillus thuringiensis serovar kurstaki str. T03a001
1	0	0	11	10	F	2715733	Candidatus Chazhemtobacteraceae		0	0	0	1	1	S2	714359	Bacillus thuringiensis BMB171		0	0	0	1	1	S2	714359	Bacillus thuringiensis BMB171
1	0	0	11	10	G	2715734	Candidatus Chazhemtobacterium		0	0	0	1	1	S2	1261129	Bacillus thuringiensis serovar kurstaki str. HD-1		0	0	0	1	1	S2	1261129	Bacillus thuringiensis serovar kurstaki str. HD-1
1	0	1	11	10	S	2715735	Candidatus Chazhemtobacterium aquaticus		0	0	0	0	0	S2	1279365	Bacillus thuringiensis serovar kurstaki str. HD73		0	0	0	0	0	S2	1279365	Bacillus thuringiensis serovar kurstaki str. HD73
8351	9.19	510	475068	397256	D1	1783272	Terrabacteria group		1	0	1	4	3	S1	1440	Bacillus thuringiensis serovar alesti		1	0	1	4	3	S1	1440	Bacillus thuringiensis serovar alesti
3017	3.32	5	369905	312571	P	200795	Chloroflexota		0	0	0	2	2	S1	180877	Bacillus thuringiensis serovar pulsiensis		0	0	0	2	2	S1	180877	Bacillus thuringiensis serovar pulsiensis
2799	3.08	0	363633	307301	C	1495646	Thermoflexia		0	0	0	2	2	S2	527028	Bacillus thuringiensis serovar pulsiensis BGSC 4CC1		0	0	0	2	2	S2	527028	Bacillus thuringiensis serovar pulsiensis BGSC 4CC1
2799	3.08	0	363633	307301	O	1495647	Thermoflexales		0	0	0	0	0	S1	1217737	Bacillus thuringiensis HD-789		0	0	0	0	0	S1	1217737	Bacillus thuringiensis HD-789
2799	3.08	0	363633	307301	F	1495648	Thermoflexaceae		0	0	0	3	3	S1	1257079	Bacillus thuringiensis DAR 81934		0	0	0	3	3	S1	1257079	Bacillus thuringiensis DAR 81934
2799	3.08	0	363633	307301	G	1495649	Thermoflexus		0	0	0	0	0	S1	1001229	Bacillus thuringiensis serovar chinensis		0	0	0	0	0	S1	1001229	Bacillus thuringiensis serovar chinensis
2799	3.08	2799	363633	307301	S	1495650	Thermoflexus hugenholtzii		0	0	0	0	0	S2	541229	Bacillus thuringiensis serovar chinensis CT-43		0	0	0	0	0	S2	541229	Bacillus thuringiensis serovar chinensis CT-43
69	0.08	0	276	258	C	2682225	Tepidiformia		0	0	0	2	1	S1	1417985	Bacillus thuringiensis LM1212		0	0	0	2	1	S1	1417985	Bacillus thuringiensis LM1212
69	0.08	0	276	258	O	2682226	Tepidiformales		0	0	0	5	5	S1	1423143	Bacillus thuringiensis Bt18247		0	0	0	5	5	S1	1423143	Bacillus thuringiensis Bt18247
69	0.08	0	276	258	F	2682227	Tepidiformaceae		0	0	0	0	0	S1	527020	Bacillus thuringiensis IBL 4222		0	0	0	0	0	S1	527020	Bacillus thuringiensis IBL 4222
69	0.08	53	276	258	G	2682228	Tepidiforma		0	0	0	0	0	S1	1452729	Bacillus thuringiensis HD1002		0	0	0	0	0	S1	1452729	Bacillus thuringiensis HD1002
13	0.01	13	52	47	S	2601677	Tepidiforma bonchosmolovskayae		0	0	0	0	0	S1	412694	Bacillus thuringiensis str. Al Hakam		0	0	0	0	0	S1	412694	Bacillus thuringiensis str. Al Hakam
3	0	3	21	20	S	3004094	Tepidiforma flava		0	0	0	7	6	S1	180882	Bacillus thuringiensis serovar monterrey		0	0	0	7	6	S1	180882	Bacillus thuringiensis serovar monterrey
49	0.05	0	796	629	C	32061	Chloroflexia		0	0	0	7	6	S2	527022	Bacillus thuringiensis serovar monterrey BGSC 4AJ1		0	0	0	7	6	S2	527022	Bacillus thuringiensis serovar monterrey BGSC 4AJ1
43	0.05	3	683	529	O	32064	Chloroflexales		0	0	0	0	0	S1	1430	Bacillus thuringiensis serovar israelensis		0	0	0	0	0	S1	1430	Bacillus thuringiensis serovar israelensis
21	0.02	0	364	298	O1	1508595	Roseiflexineae		0	0	0	0	0	S1	180874	Bacillus thuringiensis serovar pondicheriensis		0	0	0	0	0	S1	180874	Bacillus thuringiensis serovar pondicheriensis
21	0.02	0	364	298	F	1508635	Roseiflexaceae		0	0	0	0	0	S2	527029	Bacillus thuringiensis serovar pondicheriensis BGSC 4BA1		0	0	0	0	0	S2	527029	Bacillus thuringiensis serovar pondicheriensis BGSC 4BA1
21	0.02	4	364	298	G	120961	Roseiflexus		0	0	0	0	0	S1	180856	[Bacillus thuringiensis] serovar konkukian		0	0	0	0	0	S1	180856	[Bacillus thuringiensis] serovar konkukian
11	0.01	0	180	139	G1	2609473	unclassified Roseiflexus		0	0	0	0	0	S2	281309	[Bacillus thuringiensis] serovar konkukian str. 97-27		0	0	0	0	0	S2	281309	[Bacillus thuringiensis] serovar konkukian str. 97-27
11	0.01	11	180	139	S	357808	Roseiflexus sp. RS-1		0	0	0	0	0	S1	29338	Bacillus thuringiensis serovar galleriae		0	0	0	0	0	S1	29338	Bacillus thuringiensis serovar galleriae
6	0.01	0	108	91	S	120962	Roseiflexus castenholzii		0	0	0	0	0	S1	1444	Bacillus thuringiensis serovar tenebrionis		0	0	0	0	0	S1	1444	Bacillus thuringiensis serovar tenebrionis
6	0.01	6	108	91	S1	383372	Roseiflexus castenholzii DSM 13941		0	0	0	0	0	S1	1441	Bacillus thuringiensis serovar morrisoni		0	0	0	0	0	S1	1441	Bacillus thuringiensis serovar morrisoni
19	0.02	0	269	191	O1	1508594	Chloroflexineae		0	0	0	0	0	S2	1461024	Bacillus thuringiensis serovar morrisoni str. 4AA1		0	0	0	0	0	S2	1461024	Bacillus thuringiensis serovar morrisoni str. 4AA1
19	0.02	0	269	191	F	1106	Chloroflexaceae		0	0	0	0	0	S1	1434	Bacillus thuringiensis serovar berliner		0	0	0	0	0	S1	1434	Bacillus thuringiensis serovar berliner
19	0.02	6	269	191	G	1107	Chloroflexus		0	0	0	0	0	S2	527031	Bacillus thuringiensis serovar berliner ATCC 10792		0	0	0	0	0	S2	527031	Bacillus thuringiensis serovar berliner ATCC 10792
11	0.01	0	121	79	S	1108	Chloroflexus aurantiacus		0	0	0	0	0	S1	1432	Bacillus thuringiensis serovar thuringiensis		0	0	0	0	0	S1	1432	Bacillus thuringiensis serovar thuringiensis
11	0.01	11	121	79	S1	324602	Chloroflexus aurantiacus J-10-fl		0	0	0	0	0	S2	527025	Bacillus thuringiensis serovar thuringiensis str. T01001		0	0	0	0	0	S2	527025	Bacillus thuringiensis serovar thuringiensis str. T01001
2	0	0	47	43	S	152260	Chloroflexus aggregans		0	0	0	0	0	S2	1286404	Bacillus thuringiensis serovar thuringiensis str. IS5056		0	0	0	0	0	S2	1286404	Bacillus thuringiensis serovar thuringiensis str. IS5056
2	0	2	47	43	S1	326427	Chloroflexus aggregans DSM 9485		31	0.01	30	345	297	S	1405	Bacillus mycoides		31	0.01	30	345	297	S	1405	Bacillus mycoides
6	0.01	0	112	99	O	3139175	Candidatus Chloroheliales		1	0	1	10	10	S1	315730	Bacillus mycoides KBAB4		1	0	1	10	10	S1	315730	Bacillus mycoides KBAB4
6	0.01	0	112	99	F	3139177	Candidatus Chloroheliaceae		0	0	0	0	0	S1	526997	Bacillus mycoides DSM 2048		0	0	0	0	0	S1	526997	Bacillus mycoides DSM 2048
6	0.01	0	112	99	G	3139173	Candidatus Chlorohelix		14	0.01	14	186	153	S	64104	Bacillus pseudomycoides		14	0.01	14	186	153	S	64104	Bacillus pseudomycoides
6	0.01	6	112	99	S	3003348	Candidatus Chlorohelix allophototropha		0	0	0	11	11	S1	527000	Bacillus pseudomycoides DSM 12442		0	0	0	11	11	S1	527000	Bacillus pseudomycoides DSM 12442
38	0.04	0	336	280	C	301297	Dehalococcoidia		10	0	10	75	62	S	155322	Bacillus toyonensis		10	0	10	75	62	S	155322	Bacillus toyonensis
29	0.03	0	260	212	O	1202465	Dehalococcoidales		0	0	0	3	3	S1	1415784	Bacillus toyonensis BCT-7112		0	0	0	3	3	S1	1415784	Bacillus toyonensis BCT-7112
29	0.03	4	260	212	F	1202464	Dehalococcoidaceae		9	0	8	75	63	S	580165	Bacillus cytotoxicus		9	0	8	75	63	S	580165	Bacillus cytotoxicus
13	0.01	6	122	85	G	61434	Dehalococcoides		1	0	1	2	2	S1	315749	Bacillus cytotoxicus NVH 391-98		1	0	1	2	2	S1	315749	Bacillus cytotoxicus NVH 391-98
7	0.01	7	69	35	S	61435	Dehalococcoides mccartyi		7	0	7	39	35	S	2026188	Bacillus tropicus		7	0	7	39	35	S	2026188	Bacillus tropicus
0	0	0	2	2	S1	243164	Dehalococcoides mccartyi 195		7	0	7	70	61	S	1890302	Bacillus wiedmannii		7	0	7	70	61	S	1890302	Bacillus wiedmannii
0	0	0	0	0	S1	255470	Dehalococcoides mccartyi CBDB1		5	0	5	28	23	S	2817477	Bacillus paramobilis		5	0	5	28	23	S	2817477	Bacillus paramobilis
0	0	0	0	0	S1	311424	Dehalococcoides mccartyi VS		3	0	3	46	39	S	2026186	Bacillus paranthracis		3	0	3	46	39	S	2026186	Bacillus paranthracis
0	0	0	0	0	S1	1193806	Dehalococcoides mccartyi BTF08		1	0	1	15	13	S	2026187	Bacillus pacificus		1	0	1	15	13	S	2026187	Bacillus pacificus
0	0	0	3	1	S1	1193807	Dehalococcoides mccartyi DCMB5		1	0	0	5	5	S	658666	Bacillus bombysepticus		1	0	0	5	5	S	658666	Bacillus bombysepticus
0	0	0	0	0	S1	1388758	Dehalococcoides mccartyi GY50		1	0	1	4	4	S1	1330043	Bacillus bombysepticus str. Wang		1	0	1	4	4	S1	1330043	Bacillus bombysepticus str. Wang
0	0	0	1	1	S1	1407653	Dehalococcoides mccartyi IBARAKI		1	0	1	19	18	S	2026191	Bacillus luti		1	0	1	19	18	S	2026191	Bacillus luti
0	0	0	0	0	S1	1432059	Dehalococcoides mccartyi CG1		1	0	1	20	18	S	2026193	Bacillus nitratireducens		1	0	1	20	18	S	2026193	Bacillus nitratireducens
0	0	0	2	2	S1	1432060	Dehalococcoides mccartyi CG4		1	0	1	13	11	S	2026194	Bacillus paramycoides		1	0	1	13	11	S	2026194	Bacillus paramycoides
0	0	0	0	0	S1	1432061	Dehalococcoides mccartyi CG5		0	0	0	6	4	S	2026189	Bacillus albus		0	0	0	6	4	S	2026189	Bacillus albus
0	0	0	0	0	G1	237581	unclassified Dehalococcoides		0	0	0	28	25	G2	2750818	unclassified Bacillus cereus group		0	0	0	28	25	G2	2750818	unclassified Bacillus cereus group
0	0	0	0	0	S	1522671	Dehalococcoides sp. UCH007		0	0	0	3	3	S	1839798	Bacillus sp. FDAARGOS_235		0	0	0	3	3	S	1839798	Bacillus sp. FDAARGOS_235
12	0.01	6	117	106	G	670486	Dehalogenimonas		0	0	0	2	2	S	1892404	Bacillus sp. ABP14		0	0	0	2	2	S	1892404	Bacillus sp. ABP14
3	0	0	44	37	G1	2638108	unclassified Dehalogenimonas		0	0	0	6	5	S	2053832	Bacillus sp. HBCD-sjtu		0	0	0	6	5	S	2053832	Bacillus sp. HBCD-sjtu
3	0	3	44	37	S	3127115	Dehalogenimonas sp. W		0	0	0	0	0	S	2217825	Bacillus sp. AR4-2		0	0	0	0	0	S	2217825	Bacillus sp. AR4-2
2	0	2	27	25	S	1536648	Dehalogenimonas etheniformans		0	0	0	1	1	S	2217830	Bacillus sp. SH8-8		0	0	0	1	1	S	2217830	Bacillus sp. SH8-8
1	0	1	9	9	S	1839801	Dehalogenimonas formicexedens		0	0	0	9	9	S	2217832	Bacillus sp. JAS24-2		0	0	0	9	9	S	2217832	Bacillus sp. JAS24-2
9	0.01	0	68	63	C1	648176	SAR202 cluster		0	0	0	17	17	S	1392	Bacillus anthracis		0	0	0	17	17	S	1392	Bacillus anthracis
9	0.01	0	68	63	O	3143247	Candidatus Lucifugimonadales		0	0	0	0	0	S1	198094	Bacillus anthracis str. Ames		0	0	0	0	0	S1	198094	Bacillus anthracis str. Ames
9	0.01	0	68	63	F	3143248	Candidatus Lucifugimonadaceae		0	0	0	0	0	S1	260799	Bacillus anthracis str. Sterne		0	0	0	0	0	S1	260799	Bacillus anthracis str. Sterne
9	0.01	0	68	63	G	3143249	Candidatus Lucifugimonas		0	0	0	0	0	S1	261591	Bacillus anthracis str. Vollum		0	0	0	0	0	S1	261591	Bacillus anthracis str. Vollum
9	0.01	9	68	63	S	3038979	Candidatus Lucifugimonas marina		0	0	0	0	0	S1	261594	Bacillus anthracis str. 'Ames Ancestor'		0	0	0	0	0	S1	261594	Bacillus anthracis str. 'Ames Ancestor'
21	0.02	0	263	231	C	292625	Anaerolineae		0	0	0	0	0	S1	568206	Bacillus anthracis str. CDC 684		0	0	0	0	0	S1	568206	Bacillus anthracis str. CDC 684
21	0.02	0	263	231	O	292629	Anaerolineales		0	0	0	0	0	S1	592021	Bacillus anthracis str. A0248		0	0	0	0	0	S1	592021	Bacillus anthracis str. A0248
21	0.02	0	263	231	F	292628	Anaerolineaceae		0	0	0	0	0	S1	673518	Bacillus anthracis str. A16R		0	0	0	0	0	S1	673518	Bacillus anthracis str. A16R
9	0.01	0	121	103	G	233189	Anaerolinea		0	0	0	0	0	S1	743835	Bacillus anthracis str. A16		0	0	0	0	0	S1	743835	Bacillus anthracis str. A16
9	0.01	0	121	103	S	167964	Anaerolinea thermophila		0	0	0	0	0	S1	768494	Bacillus anthracis str. H9401		0	0	0	0	0	S1	768494	Bacillus anthracis str. H9401
9	0.01	9	121	103	S1	926569	Anaerolinea thermophila UNI-1		0	0	0	0	0	S1	1213182	Bacillus anthracis str. BF1		0	0	0	0	0	S1	1213182	Bacillus anthracis str. BF1
7	0.01	0	66	59	G	1649478	Pelolinea		0	0	0	0	0	S1	1392837	Bacillus anthracis str. SVA11		0	0	0	0	0	S1	1392837	Bacillus anthracis str. SVA11
7	0.01	7	66	59	S	913107	Pelolinea submarina		0	0	0	0	0	S1	1412842	Bacillus anthracis 9080-G		0	0	0	0	0	S1	1412842	Bacillus anthracis 9080-G
5	0.01	0	63	56	G	2019482	Brevefilum		0	0	0	0	0	S1	1412843	Bacillus anthracis 8903-G		0	0	0	0	0	S1	1412843	Bacillus anthracis 8903-G
5	0.01	5	63	56	S	1986204	Brevefilum fermentans		0	0	0	0	0	S1	1412844	Bacillus anthracis 52-G		0	0	0	0	0	S1	1412844	Bacillus anthracis 52-G
13	0.01	0	117	113	P1	167963	Chloroflexota incertae sedis		0	0	0	0	0	S1	1449979	Bacillus anthracis str. V770-NP-1R		0	0	0	0	0	S1	1449979	Bacillus anthracis str. V770-NP-1R
13	0.01	0	117	113	G	262406	Thermobaculum		0	0	0	0	0	S1	1452727	Bacillus anthracis str. Turkey32		0	0	0	0	0	S1	1452727	Bacillus anthracis str. Turkey32
13	0.01	0	117	113	S	166501	Thermobaculum terrenum		158	0.06	8	1939	1643	G1	185979	unclassified Bacillus (in: firmicutes)		158	0.06	8	1939	1643	G1	185979	unclassified Bacillus (in: firmicutes)
13	0.01	13	117	113	S1	525904	Thermobaculum terrenum ATCC BAA-798		16	0.01	16	136	122	S	467262	Bacillus sp. T3		16	0.01	16	136	122	S	467262	Bacillus sp. T3
12	0.01	0	256	231	C	475962	Caldilineae		13	0.01	13	127	112	S	352858	Bacillus sp. Y1		13	0.01	13	127	112	S	352858	Bacillus sp. Y1
12	0.01	0	256	231	O	475963	Caldilineales		11	0	11	114	89	S	2587848	Bacillus sp. THAF10		11	0	11	114	89	S	2587848	Bacillus sp. THAF10
12	0.01	0	256	231	F	475964	Caldilineaceae		11	0	11	100	79	S	1581038	Bacillus sp. FJAT-22090		11	0	11	100	79	S	1581038	Bacillus sp. FJAT-22090
12	0.01	0	256	231	G	233191	Caldilinea		10	0	10	133	109	S	3077585	Bacillus sp. DTU_2020_1000418_1_SI_GHA_SEK_038		10	0	10	133	109	S	3077585	Bacillus sp. DTU_2020_1000418_1_SI_GHA_SEK_038
12	0.01	0	256	231	S	133453	Caldilinea aerophila		8	0	8	77	67	S	3129297	Bacillus sp. FJAT-52991		8	0	8	77	67	S	3129297	Bacillus sp. FJAT-52991
12	0.01	12	256	231	S1	926550	Caldilinea aerophila DSM 14535 = NBRC 104270		8	0	8	118	106	S	1705566	Bacillus sp. FJAT-18017		8	0	8	118	106	S	1705566	Bacillus sp. FJAT-18017
6	0.01	0	149	119	C	388447	Ktedonobacteria		7	0	7	85	75	S	486398	Bacillus sp. S3		7	0	7	85	75	S	486398	Bacillus sp. S3
6	0.01	0	149	119	O	388448	Ktedonobacterales		6	0	6	72	68	S	2709784	Bacillus sp. KH172YL63		6	0	6	72	68	S	2709784	Bacillus sp. KH172YL63
6	0.01	0	149	119	F	2692416	Ktedonosporobacteraceae		5	0	5	18	6	S	2921523	Bacillus sp. FSL L8-0528		5	0	5	18	6	S	2921523	Bacillus sp. FSL L8-0528
6	0.01	0	149	119	G	2692417	Ktedonosporobacter		5	0	5	46	32	S	2589818	Bacillus sp. Cs-700		5	0	5	46	32	S	2589818	Bacillus sp. Cs-700
6	0.01	6	149	119	S	2509675	Ktedonosporobacter rubrisoli		4	0	4	121	104	S	666686	Bacillus sp. 1NLA3E		4	0	4	121	104	S	666686	Bacillus sp. 1NLA3E
3	0	0	59	53	C	2364196	Candidatus Thermofonsia		4	0	4	90	85	S	3073816	Bacillus sp. NEB1478		4	0	4	90	85	S	3073816	Bacillus sp. NEB1478
3	0	0	59	53	O	2364208	Phototrophicales		4	0	4	90	80	S	3052091	Bacillus sp. DX3.1		4	0	4	90	80	S	3052091	Bacillus sp. DX3.1
3	0	0	59	53	F	2922432	Phototrophicaceae		4	0	4	84	76	S	98228	Bacillus sp. OxB-1		4	0	4	84	76	S	98228	Bacillus sp. OxB-1
3	0	0	59	53	G	2922426	Phototrophicus		4	0	4	70	59	S	2014076	Bacillus sp. FJAT-42376		4	0	4	70	59	S	2014076	Bacillus sp. FJAT-42376
3	0	3	59	53	S	2710758	Phototrophicus methaneseepsis		3	0	3	31	30	S	2682541	Bacillus sp. N1-1		3	0	3	31	30	S	2682541	Bacillus sp. N1-1
2	0	0	68	56	C	1382928	Ardenticatenia		3	0	3	24	16	S	2928154	Bacillus sp. ZJS3		3	0	3	24	16	S	2928154	Bacillus sp. ZJS3
2	0	0	68	56	O	3085098	Candidatus Promineifilales		3	0	3	17	3	S	1868655	Bacillus sp. B25(2016b)		3	0	3	17	3	S	1868655	Bacillus sp. B25(2016b)
2	0	0	68	56	F	3085097	Candidatus Promineifilaceae		2	0	2	16	14	S	2499213	Bacillus sp. BD59S		2	0	2	16	14	S	2499213	Bacillus sp. BD59S
2	0	0	68	56	G	1988031	Candidatus Promineifilum		2	0	2	4	2	S	2809036	Bacillus sp. LJBS06		2	0	2	4	2	S	2809036	Bacillus sp. LJBS06
2	0	2	68	56	S	1806508	Candidatus Promineifilum breve		2	0	2	4	3	S	2846779	Bacillus sp. NP247		2	0	2	4	3	S	2846779	Bacillus sp. NP247
2454	2.7	174	38886	31562	P	1239	Bacillota		1	0	1	11	8	S	2884834	Bacillus sp. CMF12		1	0	1	11	8	S	2884834	Bacillus sp. CMF12
1416	1.56	42	22556	18081	C	91061	Bacilli		1	0	1	6	6	S	2683680	Bacillus sp. ms-22		1	0	1	6	6	S	2683680	Bacillus sp. ms-22
1044	1.15	72	16326	13136	O	1385	Bacillales		1	0	1	3	2	S	2812759	Bacillus sp. PDNC022		1	0	1	3	2	S	2812759	Bacillus sp. PDNC022
475	0.52	36	7196	5739	F	186817	Bacillaceae		1	0	1	11	6	S	2867004	Bacillus sp. FCW2		1	0	1	11	6	S	2867004	Bacillus sp. FCW2
142	0.16	44	1826	1457	G	1386	Bacillus		1	0	1	1	1	S	2874284	Bacillus sp. CRB-7		1	0	1	1	1	S	2874284	Bacillus sp. CRB-7
42	0.05	7	478	381	G1	86661	Bacillus cereus group		1	0	1	4	4	S	2876713	Bacillus sp. 41-22		1	0	1	4	4	S	2876713	Bacillus sp. 41-22
12	0.01	11	109	94	S	1396	Bacillus cereus		1	0	1	18	11	S	1071080	Bacillus sp. SB49		1	0	1	18	11	S	1071080	Bacillus sp. SB49
1	0	1	3	3	S1	526980	Bacillus cereus ATCC 10876		1	0	1	1	1	S	2921570	Bacillus sp. FSL M8-0277		1	0	1	1	1	S	2921570	Bacillus sp. FSL M8-0277
0	0	0	0	0	S1	526978	Bacillus cereus BDRD-Cer4		1	0	1	1	1	S	2921624	Bacillus sp. FSL M8-0359		1	0	1	1	1	S	2921624	Bacillus sp. FSL M8-0359
0	0	0	0	0	S1	1454382	Bacillus cereus D17		1	0	1	16	10	S	2925318	Bacillus sp. N5-665		1	0	1	16	10	S	2925318	Bacillus sp. N5-665
0	0	0	0	0	S1	1179100	Bacillus cereus biovar anthracis		1	0	1	4	2	S	2954564	Bacillus sp. FSL W7-1034		1	0	1	4	2	S	2954564	Bacillus sp. FSL W7-1034
0	0	0	0	0	S2	637380	Bacillus cereus biovar anthracis str. CI		1	0	1	1	1	S	2954677	Bacillus sp. FSL K6-1006		1	0	1	1	1	S	2954677	Bacillus sp. FSL K6-1006
0	0	0	1	1	S1	1003239	Bacillus cereus C1L		1	0	1	4	2	S	3122078	Bacillus sp. MAG717A		1	0	1	4	2	S	3122078	Bacillus sp. MAG717A
0	0	0	0	0	S1	572264	Bacillus cereus 03BB102		1	0	1	1	1	S	3139388	Bacillus sp. YBsi01		1	0	1	1	1	S	3139388	Bacillus sp. YBsi01
0	0	0	1	1	S1	526991	Bacillus cereus AH676		1	0	1	1	1	S	2070759	Bacillus sp. MBGLi79		1	0	1	1	1	S	2070759	Bacillus sp. MBGLi79
0	0	0	0	0	S1	526989	Bacillus cereus F65185		0	0	0	0	0	S	2954636	Bacillus sp. FSL W8-0920		0	0	0	0	0	S	2954636	Bacillus sp. FSL W8-0920
0	0	0	0	0	S1	526987	Bacillus cereus Rock4-2		0	0	0	0	0	S	2954591	Bacillus sp. FSL R5-0712		0	0	0	0	0	S	2954591	Bacillus sp. FSL R5-0712
0	0	0	0	0	S1	526982	Bacillus cereus Rock1-15		0	0	0	0	0	S	2954592	Bacillus sp. FSL W7-1336		0	0	0	0	0	S	2954592	Bacillus sp. FSL W7-1336
0	0	0	0	0	S1	526979	Bacillus cereus 95/8201		0	0	0	2	2	S	2954601	Bacillus sp. FSL E2-8900		0	0	0	2	2	S	2954601	Bacillus sp. FSL E2-8900
0	0	0	0	0	S1	226900	Bacillus cereus ATCC 14579		0	0	0	0	0	S	2954617	Bacillus sp. FSL L8-0215		0	0	0	0	0	S	2954617	Bacillus sp. FSL L8-0215
0	0	0	0	0	S1	526974	Bacillus cereus BDRD-ST24		0	0	0	1	1	S	2954620	Bacillus sp. FSL R5-0286		0	0	0	1	1	S	2954620	Bacillus sp. FSL R5-0286
0	0	0	2	2	S1	526970	Bacillus cereus BGSC 6E1		0	0	0	0	0	S	2954622	Bacillus sp. FSL W8-0502		0	0	0	0	0	S	2954622	Bacillus sp. FSL W8-0502
0	0	0	1	1	S1	526969	Bacillus cereus m1550		0	0	0	1	1	S	2954626	Bacillus sp. FSL W8-0629		0	0	0	1	1	S	2954626	Bacillus sp. FSL W8-0629
0	0	0	0	0	S1	526967	Bacillus cereus 172560W		0	0	0	0	0	S	2954633	Bacillus sp. FSL W8-0812		0	0	0	0	0	S	2954633	Bacillus sp. FSL W8-0812
0	0	0	0	0	S1	451709	Bacillus cereus 03BB108		0	0	0	3	3	S	2954588	Bacillus sp. FSL R5-0560		0	0	0	3	3	S	2954588	Bacillus sp. FSL R5-0560
0	0	0	4	2	S1	405535	Bacillus cereus AH820		0	0	0	1	1	S	2954646	Bacillus sp. FSL W8-1141		0	0	0	1	1	S	2954646	Bacillus sp. FSL W8-1141
0	0	0	0	0	S1	405532	Bacillus cereus B4264		0	0	0	0	0	S	2954647	Bacillus sp. FSL W8-1143		0	0	0	0	0	S	2954647	Bacillus sp. FSL W8-1143
0	0	0	2	2	S1	405531	Bacillus cereus G9842		0	0	0	0	0	S	2954665	Bacillus sp. EU52		0	0	0	0	0	S	2954665	Bacillus sp. EU52
0	0	0	0	0	S1	347495	Bacillus cereus F837/76		0	0	0	7	7	S	2954675	Bacillus sp. FSL K6-1003		0	0	0	7	7	S	2954675	Bacillus sp. FSL K6-1003
0	0	0	0	0	S1	288681	Bacillus cereus E33L		0	0	0	0	0	S	1570330	Bacillus sp. BH072		0	0	0	0	0	S	1570330	Bacillus sp. BH072
7	0.01	7	37	26	S	64104	Bacillus pseudomycoides		0	0	0	1	1	S	2954678	Bacillus sp. FSL K6-1012		0	0	0	1	1	S	2954678	Bacillus sp. FSL K6-1012
0	0	0	0	0	S1	527000	Bacillus pseudomycoides DSM 12442		0	0	0	0	0	S	2954712	Bacillus sp. PS11(2022)		0	0	0	0	0	S	2954712	Bacillus sp. PS11(2022)
6	0.01	5	78	57	S	1428	Bacillus thuringiensis		0	0	0	0	0	S	2954715	Bacillus sp. PS65		0	0	0	0	0	S	2954715	Bacillus sp. PS65
1	0	0	1	1	S1	29339	Bacillus thuringiensis serovar kurstaki		0	0	0	0	0	S	2954716	Bacillus sp. PS68		0	0	0	0	0	S	2954716	Bacillus sp. PS68
1	0	1	1	1	S2	1261129	Bacillus thuringiensis serovar kurstaki str. HD-1		0	0	0	0	0	S	1574141	Bacillus sp. YP1		0	0	0	0	0	S	1574141	Bacillus sp. YP1
0	0	0	0	0	S2	527023	Bacillus thuringiensis serovar kurstaki str. T03a001		0	0	0	0	0	S	2921625	Bacillus sp. FSL P2-0026		0	0	0	0	0	S	2921625	Bacillus sp. FSL P2-0026
0	0	0	0	0	S2	570416	Bacillus thuringiensis serovar kurstaki str. YBT-1520		0	0	0	0	0	S	2921686	Bacillus sp. FSL R7-0646		0	0	0	0	0	S	2921686	Bacillus sp. FSL R7-0646
0	0	0	0	0	S2	714359	Bacillus thuringiensis BMB171		0	0	0	3	3	S	2921694	Bacillus sp. FSL W7-1085		0	0	0	3	3	S	2921694	Bacillus sp. FSL W7-1085
0	0	0	0	0	S2	1279365	Bacillus thuringiensis serovar kurstaki str. HD73		0	0	0	0	0	S	1628753	Bacillus sp. LM 4-2		0	0	0	0	0	S	1628753	Bacillus sp. LM 4-2
0	0	0	4	4	S1	180877	Bacillus thuringiensis serovar pulsiensis		0	0	0	0	0	S	1027627	Bacillus sp. BAC		0	0	0	0	0	S	1027627	Bacillus sp. BAC
0	0	0	4	4	S2	527028	Bacillus thuringiensis serovar pulsiensis BGSC 4CC1		0	0	0	2	2	S	2933563	Bacillus sp. PGP15		0	0	0	2	2	S	2933563	Bacillus sp. PGP15
0	0	0	0	0	S1	1452729	Bacillus thuringiensis HD1002		0	0	0	0	0	S	2954558	Bacillus sp. FSL R5-0397		0	0	0	0	0	S	2954558	Bacillus sp. FSL R5-0397
0	0	0	0	0	S1	1423143	Bacillus thuringiensis Bt18247		0	0	0	0	0	S	2954560	Bacillus sp. FSL R5-0820		0	0	0	0	0	S	2954560	Bacillus sp. FSL R5-0820
0	0	0	1	1	S1	1417985	Bacillus thuringiensis LM1212		0	0	0	0	0	S	2954563	Bacillus sp. FSL R7-0651		0	0	0	0	0	S	2954563	Bacillus sp. FSL R7-0651
0	0	0	0	0	S1	1257079	Bacillus thuringiensis DAR 81934		0	0	0	0	0	S	2954717	Bacillus sp. PS93		0	0	0	0	0	S	2954717	Bacillus sp. PS93
0	0	0	0	0	S1	1218175	Bacillus thuringiensis HD-771		0	0	0	1	1	S	2954565	Bacillus sp. FSL W7-1346		0	0	0	1	1	S	2954565	Bacillus sp. FSL W7-1346
0	0	0	0	0	S1	1217737	Bacillus thuringiensis HD-789		0	0	0	1	1	S	2954566	Bacillus sp. FSL W7-1582		0	0	0	1	1	S	2954566	Bacillus sp. FSL W7-1582
0	0	0	0	0	S1	1001229	Bacillus thuringiensis serovar chinensis		0	0	0	2	2	S	2954573	Bacillus sp. FSL M8-0049		0	0	0	2	2	S	2954573	Bacillus sp. FSL M8-0049
0	0	0	0	0	S2	541229	Bacillus thuringiensis serovar chinensis CT-43		0	0	0	1	1	S	2954579	Bacillus sp. FSL M8-0350		0	0	0	1	1	S	2954579	Bacillus sp. FSL M8-0350
0	0	0	3	3	S1	529122	Bacillus thuringiensis YBT-1518		0	0	0	1	1	S	2954581	Bacillus sp. FSL P2-0069		0	0	0	1	1	S	2954581	Bacillus sp. FSL P2-0069
0	0	0	0	0	S1	527021	Bacillus thuringiensis Bt407		0	0	0	1	1	S	2954582	Bacillus sp. FSL P4-0248		0	0	0	1	1	S	2954582	Bacillus sp. FSL P4-0248
0	0	0	0	0	S1	527020	Bacillus thuringiensis IBL 4222		0	0	0	0	0	S	2954583	Bacillus sp. FSL P4-0322		0	0	0	0	0	S	2954583	Bacillus sp. FSL P4-0322
0	0	0	3	2	S1	527019	Bacillus thuringiensis IBL 200		0	0	0	1	1	S	2954585	Bacillus sp. FSL R5-0432		0	0	0	1	1	S	2954585	Bacillus sp. FSL R5-0432
0	0	0	0	0	S1	412694	Bacillus thuringiensis str. Al Hakam		0	0	0	1	1	S	2954587	Bacillus sp. FSL R5-0512		0	0	0	1	1	S	2954587	Bacillus sp. FSL R5-0512
0	0	0	13	7	S1	257985	Bacillus thuringiensis serovar andalousiensis		0	0	0	0	0	S	3083256	Bacillus sp. KICET-3		0	0	0	0	0	S	3083256	Bacillus sp. KICET-3
0	0	0	4	3	S2	527032	Bacillus thuringiensis serovar andalousiensis BGSC 4AW1		0	0	0	0	0	S	2998081	Bacillus sp. KICET-1		0	0	0	0	0	S	2998081	Bacillus sp. KICET-1
0	0	0	0	0	S1	180882	Bacillus thuringiensis serovar monterrey		0	0	0	0	0	S	3027931	Bacillus sp. N3378-2at		0	0	0	0	0	S	3027931	Bacillus sp. N3378-2at
0	0	0	0	0	S2	527022	Bacillus thuringiensis serovar monterrey BGSC 4AJ1		0	0	0	4	4	S	3035514	Bacillus sp. HSf4		0	0	0	4	4	S	3035514	Bacillus sp. HSf4
0	0	0	0	0	S1	1430	Bacillus thuringiensis serovar israelensis		0	0	0	0	0	S	1446792	Bacillus sp. Pc3		0	0	0	0	0	S	1446792	Bacillus sp. Pc3
0	0	0	0	0	S1	180874	Bacillus thuringiensis serovar pondicheriensis		0	0	0	0	0	S	1167886	Bacillus sp. B28		0	0	0	0	0	S	1167886	Bacillus sp. B28
0	0	0	0	0	S2	527029	Bacillus thuringiensis serovar pondicheriensis BGSC 4BA1		0	0	0	1	1	S	3074204	Bacillus sp. SG20001		0	0	0	1	1	S	3074204	Bacillus sp. SG20001
0	0	0	0	0	S1	180869	Bacillus thuringiensis serovar pakistani		0	0	0	5	5	S	3077323	Bacillus sp. SI2		0	0	0	5	5	S	3077323	Bacillus sp. SI2
0	0	0	0	0	S2	527027	Bacillus thuringiensis serovar pakistani str. T13001		0	0	0	0	0	S	563169	Bacillus sp. SJ-10		0	0	0	0	0	S	563169	Bacillus sp. SJ-10
0	0	0	0	0	S1	180856	[Bacillus thuringiensis] serovar konkukian		0	0	0	0	0	S	3078804	Bacillus sp. TSA-4		0	0	0	0	0	S	3078804	Bacillus sp. TSA-4
0	0	0	0	0	S2	281309	[Bacillus thuringiensis] serovar konkukian str. 97-27		0	0	0	0	0	S	2982700	Bacillus sp. L381		0	0	0	0	0	S	2982700	Bacillus sp. L381
0	0	0	0	0	S1	180854	Bacillus thuringiensis serovar huazhongensis		0	0	0	0	0	S	3098592	Bacillus sp. RA(2023)		0	0	0	0	0	S	3098592	Bacillus sp. RA(2023)
0	0	0	0	0	S2	527030	Bacillus thuringiensis serovar huazhongensis BGSC 4BD1		0	0	0	0	0	S	3103135	Bacillus sp. OK-29		0	0	0	0	0	S	3103135	Bacillus sp. OK-29
0	0	0	0	0	S1	180850	Bacillus thuringiensis serovar indiana		0	0	0	0	0	S	3117553	Bacillus sp. MT(2024)		0	0	0	0	0	S	3117553	Bacillus sp. MT(2024)
0	0	0	0	0	S1	29338	Bacillus thuringiensis serovar galleriae		0	0	0	1	1	S	1127744	Bacillus sp. JS		0	0	0	1	1	S	1127744	Bacillus sp. JS
0	0	0	0	0	S1	1444	Bacillus thuringiensis serovar tenebrionis		0	0	0	0	0	S	3125777	Bacillus sp. PPSBB_11		0	0	0	0	0	S	3125777	Bacillus sp. PPSBB_11
0	0	0	2	1	S1	1442	Bacillus thuringiensis serovar tolworthi		0	0	0	0	0	S	3126755	Bacillus sp. BR3(2024)		0	0	0	0	0	S	3126755	Bacillus sp. BR3(2024)
0	0	0	0	0	S1	1441	Bacillus thuringiensis serovar morrisoni		0	0	0	0	0	S	393065	Bacillus sp. E25		0	0	0	0	0	S	393065	Bacillus sp. E25
0	0	0	0	0	S2	1461024	Bacillus thuringiensis serovar morrisoni str. 4AA1		0	0	0	3	3	S	1071078	Bacillus sp. NSP9.1		0	0	0	3	3	S	1071078	Bacillus sp. NSP9.1
0	0	0	0	0	S1	1440	Bacillus thuringiensis serovar alesti		0	0	0	0	0	S	2975294	Bacillus sp. FSL K6-2861		0	0	0	0	0	S	2975294	Bacillus sp. FSL K6-2861
0	0	0	0	0	S1	1434	Bacillus thuringiensis serovar berliner		0	0	0	0	0	S	2954718	Bacillus sp. PS95		0	0	0	0	0	S	2954718	Bacillus sp. PS95
0	0	0	0	0	S2	527031	Bacillus thuringiensis serovar berliner ATCC 10792		0	0	0	0	0	S	2954719	Bacillus sp. PS194		0	0	0	0	0	S	2954719	Bacillus sp. PS194
0	0	0	0	0	S1	1432	Bacillus thuringiensis serovar thuringiensis		0	0	0	1	1	S	2954720	Bacillus sp. PS196		0	0	0	1	1	S	2954720	Bacillus sp. PS196
0	0	0	0	0	S2	527025	Bacillus thuringiensis serovar thuringiensis str. T01001		0	0	0	0	0	S	2954721	Bacillus sp. PS210		0	0	0	0	0	S	2954721	Bacillus sp. PS210
0	0	0	0	0	S2	1286404	Bacillus thuringiensis serovar thuringiensis str. IS5056		0	0	0	0	0	S	2954722	Bacillus sp. PS217		0	0	0	0	0	S	2954722	Bacillus sp. PS217
4	0	4	57	51	S	1405	Bacillus mycoides		0	0	0	0	0	S	2954723	Bacillus sp. PS237		0	0	0	0	0	S	2954723	Bacillus sp. PS237
0	0	0	2	2	S1	315730	Bacillus mycoides KBAB4		0	0	0	1	1	S	2954725	Bacillus sp. PS108		0	0	0	1	1	S	2954725	Bacillus sp. PS108
0	0	0	0	0	S1	526997	Bacillus mycoides DSM 2048		0	0	0	1	1	S	2962681	Bacillus sp. KRF7		0	0	0	1	1	S	2962681	Bacillus sp. KRF7
3	0	3	16	7	S	1890302	Bacillus wiedmannii		0	0	0	0	0	S	2975293	Bacillus sp. FSL K6-1560		0	0	0	0	0	S	2975293	Bacillus sp. FSL K6-1560
1	0	1	14	13	S	155322	Bacillus toyonensis		0	0	0	0	0	S	2921622	Bacillus sp. FSL M8-0315		0	0	0	0	0	S	2921622	Bacillus sp. FSL M8-0315
0	0	0	0	0	S1	1415784	Bacillus toyonensis BCT-7112		0	0	0	1	1	S	2975298	Bacillus sp. FSL L8-0358		0	0	0	1	1	S	2975298	Bacillus sp. FSL L8-0358
1	0	1	19	11	S	580165	Bacillus cytotoxicus		0	0	0	0	0	S	2975299	Bacillus sp. FSL R5-0416		0	0	0	0	0	S	2975299	Bacillus sp. FSL R5-0416
0	0	0	0	0	S1	315749	Bacillus cytotoxicus NVH 391-98		0	0	0	1	1	S	2975302	Bacillus sp. FSL R5-0443		0	0	0	1	1	S	2975302	Bacillus sp. FSL R5-0443
1	0	1	8	7	S	1392	Bacillus anthracis		0	0	0	0	0	S	2975303	Bacillus sp. FSL R5-0447		0	0	0	0	0	S	2975303	Bacillus sp. FSL R5-0447
0	0	0	0	0	S1	198094	Bacillus anthracis str. Ames		0	0	0	11	4	S	2975304	Bacillus sp. FSL R5-0523		0	0	0	11	4	S	2975304	Bacillus sp. FSL R5-0523
0	0	0	0	0	S1	260799	Bacillus anthracis str. Sterne		0	0	0	0	0	S	2975306	Bacillus sp. FSL R5-0593		0	0	0	0	0	S	2975306	Bacillus sp. FSL R5-0593
0	0	0	0	0	S1	261591	Bacillus anthracis str. Vollum		0	0	0	0	0	S	2975323	Bacillus sp. FSL K6-8391		0	0	0	0	0	S	2975323	Bacillus sp. FSL K6-8391
0	0	0	0	0	S1	261594	Bacillus anthracis str. 'Ames Ancestor'		0	0	0	0	0	S	2975344	Bacillus sp. EU63		0	0	0	0	0	S	2975344	Bacillus sp. EU63
0	0	0	0	0	S1	568206	Bacillus anthracis str. CDC 684		0	0	0	0	0	S	2026248	Bacillus sp. 1s-1		0	0	0	0	0	S	2026248	Bacillus sp. 1s-1
0	0	0	0	0	S1	592021	Bacillus anthracis str. A0248		0	0	0	4	2	S	2789208	Bacillus sp. N447-1		0	0	0	4	2	S	2789208	Bacillus sp. N447-1
0	0	0	0	0	S1	673518	Bacillus anthracis str. A16R		0	0	0	0	0	S	2789210	Bacillus sp. A1(2020)		0	0	0	0	0	S	2789210	Bacillus sp. A1(2020)
0	0	0	0	0	S1	743835	Bacillus anthracis str. A16		0	0	0	3	1	S	2796141	Bacillus sp. HNR-4		0	0	0	3	1	S	2796141	Bacillus sp. HNR-4
0	0	0	0	0	S1	768494	Bacillus anthracis str. H9401		0	0	0	0	0	S	2049935	Bacillus sp. Lzh-5		0	0	0	0	0	S	2049935	Bacillus sp. Lzh-5
0	0	0	0	0	S1	1213182	Bacillus anthracis str. BF1		0	0	0	3	3	S	2821409	Bacillus sp. LJBV19		0	0	0	3	3	S	2821409	Bacillus sp. LJBV19
0	0	0	0	0	S1	1392837	Bacillus anthracis str. SVA11		0	0	0	2	2	S	2831519	Bacillus sp. FS02		0	0	0	2	2	S	2831519	Bacillus sp. FS02
0	0	0	0	0	S1	1412842	Bacillus anthracis 9080-G		0	0	0	0	0	S	2841656	Bacillus sp. ZHX3		0	0	0	0	0	S	2841656	Bacillus sp. ZHX3
0	0	0	0	0	S1	1412843	Bacillus anthracis 8903-G		0	0	0	2	2	S	2842457	Bacillus sp. JNUCC-22		0	0	0	2	2	S	2842457	Bacillus sp. JNUCC-22
0	0	0	0	0	S1	1412844	Bacillus anthracis 52-G		0	0	0	0	0	S	2842458	Bacillus sp. JNUCC-24		0	0	0	0	0	S	2842458	Bacillus sp. JNUCC-24
0	0	0	0	0	S1	1449979	Bacillus anthracis str. V770-NP-1R		0	0	0	1	1	S	2762329	Bacillus sp. PAMC26543		0	0	0	1	1	S	2762329	Bacillus sp. PAMC26543
0	0	0	0	0	S1	1452727	Bacillus anthracis str. Turkey32		0	0	0	0	0	S	2851015	Bacillus sp. 7D3		0	0	0	0	0	S	2851015	Bacillus sp. 7D3
0	0	0	7	7	S	2817477	Bacillus paramobilis		0	0	0	3	3	S	2859227	Bacillus sp. LJBS17		0	0	0	3	3	S	2859227	Bacillus sp. LJBS17
0	0	0	7	3	G2	2750818	unclassified Bacillus cereus group		0	0	0	2	2	S	2009331	Bacillus sp. MD-5		0	0	0	2	2	S	2009331	Bacillus sp. MD-5
0	0	0	1	1	S	1839798	Bacillus sp. FDAARGOS_235		0	0	0	0	0	S	1941347	Bacillus sp. 275		0	0	0	0	0	S	1941347	Bacillus sp. 275
0	0	0	0	0	S	1892404	Bacillus sp. ABP14		0	0	0	0	0	S	2875710	Bacillus sp. PM8313		0	0	0	0	0	S	2875710	Bacillus sp. PM8313
0	0	0	0	0	S	2053832	Bacillus sp. HBCD-sjtu		0	0	0	0	0	S	1856406	Bacillus sp. H15-1		0	0	0	0	0	S	1856406	Bacillus sp. H15-1
0	0	0	0	0	S	2217825	Bacillus sp. AR4-2		0	0	0	0	0	S	1837130	Bacillus sp. FJAT-14266		0	0	0	0	0	S	1837130	Bacillus sp. FJAT-14266
0	0	0	0	0	S	2217830	Bacillus sp. SH8-8		0	0	0	0	0	S	2888526	Bacillus sp. BC1-43		0	0	0	0	0	S	2888526	Bacillus sp. BC1-43
0	0	0	1	1	S	2217832	Bacillus sp. JAS24-2		0	0	0	0	0	S	2912260	Bacillus sp. R45		0	0	0	0	0	S	2912260	Bacillus sp. R45
0	0	0	3	3	S	2026194	Bacillus paramycoides		0	0	0	0	0	S	2660750	Bacillus sp. A260		0	0	0	0	0	S	2660750	Bacillus sp. A260
0	0	0	2	2	S	2026193	Bacillus nitratireducens		0	0	0	0	0	S	2448811	Bacillus sp. WR11		0	0	0	0	0	S	2448811	Bacillus sp. WR11
0	0	0	4	4	S	2026191	Bacillus luti		0	0	0	4	4	S	2233998	Bacillus sp. COPE52		0	0	0	4	4	S	2233998	Bacillus sp. COPE52
0	0	0	2	2	S	2026189	Bacillus albus		0	0	0	0	0	S	2529386	Bacillus sp. SYJ		0	0	0	0	0	S	2529386	Bacillus sp. SYJ
0	0	0	4	4	S	2026188	Bacillus tropicus		0	0	0	2	2	S	2576356	Bacillus sp. FDAARGOS_527		0	0	0	2	2	S	2576356	Bacillus sp. FDAARGOS_527
0	0	0	1	1	S	2026187	Bacillus pacificus		0	0	0	0	0	S	2582827	Bacillus sp. KBS0812		0	0	0	0	0	S	2582827	Bacillus sp. KBS0812
0	0	0	7	7	S	2026186	Bacillus paranthracis		0	0	0	0	0	S	2585772	Bacillus sp. HNA3		0	0	0	0	0	S	2585772	Bacillus sp. HNA3
0	0	0	1	1	S	658666	Bacillus bombysepticus		0	0	0	0	0	S	745774	Bacillus sp. K1		0	0	0	0	0	S	745774	Bacillus sp. K1
0	0	0	1	1	S1	1330043	Bacillus bombysepticus str. Wang		0	0	0	0	0	S	2231056	Bacillus sp. CR71		0	0	0	0	0	S	2231056	Bacillus sp. CR71
19	0.02	2	390	299	G1	185979	unclassified Bacillus (in: firmicutes)		0	0	0	3	3	S	2608254	Bacillus sp. BS98		0	0	0	3	3	S	2608254	Bacillus sp. BS98
3	0	3	28	26	S	352858	Bacillus sp. Y1		0	0	0	0	0	S	2912825	Bacillus sp. Man122		0	0	0	0	0	S	2912825	Bacillus sp. Man122
2	0	2	15	14	S	98228	Bacillus sp. OxB-1		0	0	0	0	0	S	2665175	Bacillus sp. AM1(2019)		0	0	0	0	0	S	2665175	Bacillus sp. AM1(2019)
2	0	2	19	18	S	2587848	Bacillus sp. THAF10		0	0	0	0	0	S	2093834	Bacillus sp. ZY-1-1		0	0	0	0	0	S	2093834	Bacillus sp. ZY-1-1
2	0	2	32	22	S	666686	Bacillus sp. 1NLA3E		0	0	0	1	1	S	2080759	Bacillus sp. DU-106		0	0	0	1	1	S	2080759	Bacillus sp. DU-106
1	0	1	17	15	S	3052091	Bacillus sp. DX3.1		0	0	0	0	0	S	2709781	Bacillus sp. LUNF1		0	0	0	0	0	S	2709781	Bacillus sp. LUNF1
1	0	1	32	19	S	1705566	Bacillus sp. FJAT-18017		0	0	0	4	2	S	580459	Bacillus sp. 3a		0	0	0	4	2	S	580459	Bacillus sp. 3a
1	0	1	26	13	S	3073816	Bacillus sp. NEB1478		0	0	0	0	0	S	2762326	Bacillus sp. PAMC22265		0	0	0	0	0	S	2762326	Bacillus sp. PAMC22265
1	0	1	19	19	S	1581038	Bacillus sp. FJAT-22090		0	0	0	0	0	S	2762327	Bacillus sp. PAMC28571		0	0	0	0	0	S	2762327	Bacillus sp. PAMC28571
1	0	1	6	4	S	1071080	Bacillus sp. SB49		0	0	0	0	0	S	2762328	Bacillus sp. PAMC28748		0	0	0	0	0	S	2762328	Bacillus sp. PAMC28748
1	0	1	22	4	S	2975304	Bacillus sp. FSL R5-0523		0	0	0	0	0	S	2921567	Bacillus sp. FSL M8-0071		0	0	0	0	0	S	2921567	Bacillus sp. FSL M8-0071
1	0	1	33	19	S	3129297	Bacillus sp. FJAT-52991		0	0	0	0	0	S	2921526	Bacillus sp. FSL L8-0654		0	0	0	0	0	S	2921526	Bacillus sp. FSL L8-0654
1	0	1	11	11	S	467262	Bacillus sp. T3		0	0	0	1	1	S	2921527	Bacillus sp. FSL L8-0661		0	0	0	1	1	S	2921527	Bacillus sp. FSL L8-0661
0	0	0	0	0	S	2954565	Bacillus sp. FSL W7-1346		0	0	0	2	2	S	2921528	Bacillus sp. FSL M7-0003		0	0	0	2	2	S	2921528	Bacillus sp. FSL M7-0003
0	0	0	0	0	S	2954566	Bacillus sp. FSL W7-1582		0	0	0	0	0	S	2921530	Bacillus sp. FSL M7-0307		0	0	0	0	0	S	2921530	Bacillus sp. FSL M7-0307
0	0	0	0	0	S	2954564	Bacillus sp. FSL W7-1034		0	0	0	1	1	S	2921535	Bacillus sp. FSL M7-0791		0	0	0	1	1	S	2921535	Bacillus sp. FSL M7-0791
0	0	0	4	2	S	2954573	Bacillus sp. FSL M8-0049		0	0	0	2	2	S	2921562	Bacillus sp. FSL K6-0972		0	0	0	2	2	S	2921562	Bacillus sp. FSL K6-0972
0	0	0	0	0	S	2954579	Bacillus sp. FSL M8-0350		0	0	0	0	0	S	2921563	Bacillus sp. FSL K6-0998		0	0	0	0	0	S	2921563	Bacillus sp. FSL K6-0998
0	0	0	0	0	S	2954581	Bacillus sp. FSL P2-0069		0	0	0	0	0	S	2921564	Bacillus sp. FSL M8-0025		0	0	0	0	0	S	2921564	Bacillus sp. FSL M8-0025
0	0	0	0	0	S	2954582	Bacillus sp. FSL P4-0248		0	0	0	0	0	S	2921565	Bacillus sp. FSL M8-0054		0	0	0	0	0	S	2921565	Bacillus sp. FSL M8-0054
0	0	0	0	0	S	2954563	Bacillus sp. FSL R7-0651		0	0	0	3	3	S	1806216	Bacillus sp. RZ2MS9		0	0	0	3	3	S	1806216	Bacillus sp. RZ2MS9
0	0	0	0	0	S	2954633	Bacillus sp. FSL W8-0812		0	0	0	0	0	S	2921569	Bacillus sp. FSL M8-0266		0	0	0	0	0	S	2921569	Bacillus sp. FSL M8-0266
0	0	0	0	0	S	2954560	Bacillus sp. FSL R5-0820		0	0	0	2	1	S	1774743	Bacillus sp. SDLI1		0	0	0	2	1	S	1774743	Bacillus sp. SDLI1
0	0	0	0	0	S	2954583	Bacillus sp. FSL P4-0322		0	0	0	2	2	S	2921574	Bacillus sp. FSL P4-0290		0	0	0	2	2	S	2921574	Bacillus sp. FSL P4-0290
0	0	0	0	0	S	2954585	Bacillus sp. FSL R5-0432		0	0	0	5	5	S	2921577	Bacillus sp. FSL R5-0422		0	0	0	5	5	S	2921577	Bacillus sp. FSL R5-0422
0	0	0	0	0	S	2954587	Bacillus sp. FSL R5-0512		0	0	0	0	0	S	2921587	Bacillus sp. FSL R7-0672		0	0	0	0	0	S	2921587	Bacillus sp. FSL R7-0672
0	0	0	1	1	S	2954588	Bacillus sp. FSL R5-0560		0	0	0	0	0	S	2921588	Bacillus sp. FSL R7-0675		0	0	0	0	0	S	2921588	Bacillus sp. FSL R7-0675
0	0	0	0	0	S	2954591	Bacillus sp. FSL R5-0712		0	0	0	0	0	S	2921612	Bacillus sp. FSL M8-0133		0	0	0	0	0	S	2921612	Bacillus sp. FSL M8-0133
0	0	0	0	0	S	2954592	Bacillus sp. FSL W7-1336		0	0	0	0	0	S	2267265	Bacillus sp. DM2		0	0	0	0	0	S	2267265	Bacillus sp. DM2
0	0	0	0	0	S	2954601	Bacillus sp. FSL E2-8900		0	0	0	0	0	S	2921462	Bacillus sp. FSL K6-1109		0	0	0	0	0	S	2921462	Bacillus sp. FSL K6-1109
0	0	0	0	0	S	2954617	Bacillus sp. FSL L8-0215		0	0	0	2	1	S	2921397	Bacillus sp. FSL H8-0516		0	0	0	2	1	S	2921397	Bacillus sp. FSL H8-0516
0	0	0	0	0	S	2954620	Bacillus sp. FSL R5-0286		0	0	0	0	0	S	2921409	Bacillus sp. FSL K6-0046		0	0	0	0	0	S	2921409	Bacillus sp. FSL K6-0046
0	0	0	0	0	S	2954622	Bacillus sp. FSL W8-0502		0	0	0	2	2	S	2921422	Bacillus sp. FSL K6-0138		0	0	0	2	2	S	2921422	Bacillus sp. FSL K6-0138
0	0	0	0	0	S	2954626	Bacillus sp. FSL W8-0629		0	0	0	0	0	S	2921436	Bacillus sp. FSL H7-0578		0	0	0	0	0	S	2921436	Bacillus sp. FSL H7-0578
0	0	0	0	0	S	2921535	Bacillus sp. FSL M7-0791		0	0	0	0	0	S	2921454	Bacillus sp. FSL K6-0923		0	0	0	0	0	S	2921454	Bacillus sp. FSL K6-0923
0	0	0	0	0	S	2921587	Bacillus sp. FSL R7-0672		0	0	0	4	4	S	2921456	Bacillus sp. FSL K6-0993		0	0	0	4	4	S	2921456	Bacillus sp. FSL K6-0993
0	0	0	0	0	S	3139388	Bacillus sp. YBsi01		0	0	0	1	1	S	2921457	Bacillus sp. FSL K6-0994		0	0	0	1	1	S	2921457	Bacillus sp. FSL K6-0994
0	0	0	0	0	S	2921562	Bacillus sp. FSL K6-0972		0	0	0	0	0	S	2921458	Bacillus sp. FSL K6-1000		0	0	0	0	0	S	2921458	Bacillus sp. FSL K6-1000
0	0	0	0	0	S	2921563	Bacillus sp. FSL K6-0998		0	0	0	1	1	S	2921459	Bacillus sp. FSL K6-1033		0	0	0	1	1	S	2921459	Bacillus sp. FSL K6-1033
0	0	0	0	0	S	2921564	Bacillus sp. FSL M8-0025		0	0	0	1	1	S	756828	Bacillus sp. WP8		0	0	0	1	1	S	756828	Bacillus sp. WP8
0	0	0	0	0	S	2921565	Bacillus sp. FSL M8-0054		0	0	0	0	0	S	2921470	Bacillus sp. FSL K6-1366		0	0	0	0	0	S	2921470	Bacillus sp. FSL K6-1366
0	0	0	0	0	S	2921567	Bacillus sp. FSL M8-0071		0	0	0	0	0	S	2921479	Bacillus sp. FSL K6-2837		0	0	0	0	0	S	2921479	Bacillus sp. FSL K6-2837
0	0	0	0	0	S	2921569	Bacillus sp. FSL M8-0266		0	0	0	0	0	S	2921481	Bacillus sp. FSL K6-2841		0	0	0	0	0	S	2921481	Bacillus sp. FSL K6-2841
0	0	0	0	0	S	2921570	Bacillus sp. FSL M8-0277		0	0	0	1	1	S	2921488	Bacillus sp. FSL K6-3149		0	0	0	1	1	S	2921488	Bacillus sp. FSL K6-3149
0	0	0	0	0	S	2921574	Bacillus sp. FSL P4-0290		0	0	0	0	0	S	2921496	Bacillus sp. FSL K6-3200		0	0	0	0	0	S	2921496	Bacillus sp. FSL K6-3200
0	0	0	1	1	S	2921577	Bacillus sp. FSL R5-0422		0	0	0	1	1	S	2921507	Bacillus sp. FSL K6-4563		0	0	0	1	1	S	2921507	Bacillus sp. FSL K6-4563
0	0	0	0	0	S	2954558	Bacillus sp. FSL R5-0397		0	0	0	0	0	S	2921517	Bacillus sp. FSL L8-0167		0	0	0	0	0	S	2921517	Bacillus sp. FSL L8-0167
0	0	0	0	0	S	2921588	Bacillus sp. FSL R7-0675		0	0	0	1	1	S	2921520	Bacillus sp. FSL L8-0193		0	0	0	1	1	S	2921520	Bacillus sp. FSL L8-0193
0	0	0	0	0	S	2921612	Bacillus sp. FSL M8-0133		86	0.03	9	840	703	G1	653685	Bacillus subtilis group		86	0.03	9	840	703	G1	653685	Bacillus subtilis group
0	0	0	0	0	S	2921622	Bacillus sp. FSL M8-0315		18	0.01	18	139	105	S	1423	Bacillus subtilis		18	0.01	18	139	105	S	1423	Bacillus subtilis
0	0	0	0	0	S	2921624	Bacillus sp. FSL M8-0359		0	0	0	0	0	S1	86029	Bacillus subtilis subsp. natto		0	0	0	0	0	S1	86029	Bacillus subtilis subsp. natto
0	0	0	0	0	S	2921625	Bacillus sp. FSL P2-0026		0	0	0	0	0	S2	645657	Bacillus subtilis subsp. natto BEST195		0	0	0	0	0	S2	645657	Bacillus subtilis subsp. natto BEST195
0	0	0	0	0	S	2921686	Bacillus sp. FSL R7-0646		0	0	0	4	4	S1	135461	Bacillus subtilis subsp. subtilis		0	0	0	4	4	S1	135461	Bacillus subtilis subsp. subtilis
0	0	0	0	0	S	2921694	Bacillus sp. FSL W7-1085		0	0	0	1	1	S2	224308	Bacillus subtilis subsp. subtilis str. 168		0	0	0	1	1	S2	224308	Bacillus subtilis subsp. subtilis str. 168
0	0	0	5	4	S	2925318	Bacillus sp. N5-665		0	0	0	0	0	S2	535024	Bacillus subtilis subsp. subtilis str. SMY		0	0	0	0	0	S2	535024	Bacillus subtilis subsp. subtilis str. SMY
0	0	0	2	2	S	2928154	Bacillus sp. ZJS3		0	0	0	0	0	S2	535025	Bacillus subtilis subsp. subtilis str. JH642		0	0	0	0	0	S2	535025	Bacillus subtilis subsp. subtilis str. JH642
0	0	0	0	0	S	2933563	Bacillus sp. PGP15		0	0	0	0	0	S3	1232554	Bacillus subtilis subsp. subtilis str. JH642 substr. AG174		0	0	0	0	0	S3	1232554	Bacillus subtilis subsp. subtilis str. JH642 substr. AG174
0	0	0	0	0	S	3074204	Bacillus sp. SG20001		0	0	0	0	0	S2	535026	Bacillus subtilis subsp. subtilis NCIB 3610 = ATCC 6051 = DSM 10		0	0	0	0	0	S2	535026	Bacillus subtilis subsp. subtilis NCIB 3610 = ATCC 6051 = DSM 10
0	0	0	0	0	S	2975299	Bacillus sp. FSL R5-0416		0	0	0	0	0	S3	1147161	Bacillus subtilis subsp. subtilis 6051-HGW		0	0	0	0	0	S3	1147161	Bacillus subtilis subsp. subtilis 6051-HGW
0	0	0	0	0	S	2975302	Bacillus sp. FSL R5-0443		0	0	0	0	0	S2	1052588	Bacillus subtilis subsp. subtilis str. RO-NN-1		0	0	0	0	0	S2	1052588	Bacillus subtilis subsp. subtilis str. RO-NN-1
0	0	0	0	0	S	2975303	Bacillus sp. FSL R5-0447		0	0	0	0	0	S2	1192196	Bacillus subtilis subsp. subtilis str. BSP1		0	0	0	0	0	S2	1192196	Bacillus subtilis subsp. subtilis str. BSP1
0	0	0	0	0	S	2975306	Bacillus sp. FSL R5-0593		0	0	0	0	0	S2	1221328	Bacillus subtilis subsp. subtilis str. AG1839		0	0	0	0	0	S2	1221328	Bacillus subtilis subsp. subtilis str. AG1839
0	0	0	0	0	S	2975323	Bacillus sp. FSL K6-8391		0	0	0	0	0	S2	1302650	Bacillus subtilis subsp. subtilis str. BAB-1		0	0	0	0	0	S2	1302650	Bacillus subtilis subsp. subtilis str. BAB-1
0	0	0	0	0	S	2975344	Bacillus sp. EU63		0	0	0	0	0	S2	1404258	Bacillus subtilis subsp. subtilis str. OH 131.1		0	0	0	0	0	S2	1404258	Bacillus subtilis subsp. subtilis str. OH 131.1
0	0	0	0	0	S	2982700	Bacillus sp. L381		0	0	0	0	0	S1	936156	Bacillus subtilis BSn5		0	0	0	0	0	S1	936156	Bacillus subtilis BSn5
0	0	0	0	0	S	2998081	Bacillus sp. KICET-1		0	0	0	0	0	S1	1136873	Bacillus subtilis KCTC 1028 = ATCC 6051a		0	0	0	0	0	S1	1136873	Bacillus subtilis KCTC 1028 = ATCC 6051a
0	0	0	0	0	S	3027931	Bacillus sp. N3378-2at		0	0	0	0	0	S1	1204342	Bacillus subtilis BEST7003		0	0	0	0	0	S1	1204342	Bacillus subtilis BEST7003
0	0	0	1	1	S	3035514	Bacillus sp. HSf4		0	0	0	0	0	S1	1220533	Bacillus subtilis QB928		0	0	0	0	0	S1	1220533	Bacillus subtilis QB928
0	0	0	0	0	S	2975298	Bacillus sp. FSL L8-0358		0	0	0	2	1	S1	1233100	Bacillus subtilis XF-1		0	0	0	2	1	S1	1233100	Bacillus subtilis XF-1
0	0	0	1	1	S	3077323	Bacillus sp. SI2		0	0	0	0	0	S1	1340494	Bacillus subtilis TO-A		0	0	0	0	0	S1	1340494	Bacillus subtilis TO-A
0	0	0	20	18	S	3077585	Bacillus sp. DTU_2020_1000418_1_SI_GHA_SEK_038		0	0	0	0	0	S1	1415167	Bacillus subtilis PY79		0	0	0	0	0	S1	1415167	Bacillus subtilis PY79
0	0	0	0	0	S	3078804	Bacillus sp. TSA-4		0	0	0	0	0	S1	1453990	Bacillus subtilis HJ5		0	0	0	0	0	S1	1453990	Bacillus subtilis HJ5
0	0	0	0	0	S	3083256	Bacillus sp. KICET-3		18	0.01	8	231	208	G2	1938374	Bacillus amyloliquefaciens group		18	0.01	8	231	208	G2	1938374	Bacillus amyloliquefaciens group
0	0	0	0	0	S	3098592	Bacillus sp. RA(2023)		10	0	10	131	116	S	492670	Bacillus velezensis		10	0	10	131	116	S	492670	Bacillus velezensis
0	0	0	0	0	S	3103135	Bacillus sp. OK-29		0	0	0	0	0	S1	326423	Bacillus velezensis FZB42		0	0	0	0	0	S1	326423	Bacillus velezensis FZB42
0	0	0	0	0	S	3117553	Bacillus sp. MT(2024)		0	0	0	0	0	S1	1114958	Bacillus velezensis CAU B946		0	0	0	0	0	S1	1114958	Bacillus velezensis CAU B946
0	0	0	0	0	S	3122078	Bacillus sp. MAG717A		0	0	0	0	0	S1	1150475	Bacillus velezensis UCMB5036		0	0	0	0	0	S1	1150475	Bacillus velezensis UCMB5036
0	0	0	0	0	S	3125777	Bacillus sp. PPSBB_11		0	0	0	0	0	S1	1150476	Bacillus velezensis UCMB5113		0	0	0	0	0	S1	1150476	Bacillus velezensis UCMB5113
0	0	0	0	0	S	3126755	Bacillus sp. BR3(2024)		0	0	0	0	0	S1	1155777	Bacillus velezensis YAU B9601-Y2		0	0	0	0	0	S1	1155777	Bacillus velezensis YAU B9601-Y2
0	0	0	0	0	S	2954718	Bacillus sp. PS95		0	0	0	0	0	S1	1225788	Bacillus velezensis AS43.3		0	0	0	0	0	S1	1225788	Bacillus velezensis AS43.3
0	0	0	0	0	S	2954646	Bacillus sp. FSL W8-1141		0	0	0	0	0	S1	1338518	Bacillus velezensis UCMB5033		0	0	0	0	0	S1	1338518	Bacillus velezensis UCMB5033
0	0	0	0	0	S	2954647	Bacillus sp. FSL W8-1143		0	0	0	0	0	S1	1385727	Bacillus velezensis NAU-B3		0	0	0	0	0	S1	1385727	Bacillus velezensis NAU-B3
0	0	0	0	0	S	2954665	Bacillus sp. EU52		0	0	0	0	0	S1	1423138	Bacillus velezensis SQR9		0	0	0	0	0	S1	1423138	Bacillus velezensis SQR9
0	0	0	0	0	S	2954675	Bacillus sp. FSL K6-1003		0	0	0	0	0	S1	1449088	Bacillus velezensis TrigoCor1448		0	0	0	0	0	S1	1449088	Bacillus velezensis TrigoCor1448
0	0	0	0	0	S	2954677	Bacillus sp. FSL K6-1006		0	0	0	0	0	S1	1458206	Bacillus velezensis NJN-6		0	0	0	0	0	S1	1458206	Bacillus velezensis NJN-6
0	0	0	0	0	S	2954678	Bacillus sp. FSL K6-1012		0	0	0	22	22	S	1390	Bacillus amyloliquefaciens		0	0	0	22	22	S	1390	Bacillus amyloliquefaciens
0	0	0	0	0	S	2954712	Bacillus sp. PS11(2022)		0	0	0	0	0	S1	692420	Bacillus amyloliquefaciens DSM 7 = ATCC 23350		0	0	0	0	0	S1	692420	Bacillus amyloliquefaciens DSM 7 = ATCC 23350
0	0	0	0	0	S	2954715	Bacillus sp. PS65		0	0	0	0	0	S1	999891	Bacillus amyloliquefaciens TA208		0	0	0	0	0	S1	999891	Bacillus amyloliquefaciens TA208
0	0	0	0	0	S	2954716	Bacillus sp. PS68		0	0	0	0	0	S1	1001582	Bacillus amyloliquefaciens LL3		0	0	0	0	0	S1	1001582	Bacillus amyloliquefaciens LL3
0	0	0	0	0	S	2954717	Bacillus sp. PS93		0	0	0	0	0	S1	1034836	Bacillus amyloliquefaciens XH7		0	0	0	0	0	S1	1034836	Bacillus amyloliquefaciens XH7
0	0	0	0	0	S	2954636	Bacillus sp. FSL W8-0920		0	0	0	0	0	S1	1091041	Bacillus amyloliquefaciens IT-45		0	0	0	0	0	S1	1091041	Bacillus amyloliquefaciens IT-45
0	0	0	0	0	S	2954719	Bacillus sp. PS194		0	0	0	0	0	S1	1292358	Bacillus amyloliquefaciens KHG19		0	0	0	0	0	S1	1292358	Bacillus amyloliquefaciens KHG19
0	0	0	0	0	S	2954720	Bacillus sp. PS196		0	0	0	0	0	S1	1333538	Bacillus amyloliquefaciens UMAF6639		0	0	0	0	0	S1	1333538	Bacillus amyloliquefaciens UMAF6639
0	0	0	0	0	S	2954721	Bacillus sp. PS210		0	0	0	0	0	S1	1412898	Bacillus amyloliquefaciens CC178		0	0	0	0	0	S1	1412898	Bacillus amyloliquefaciens CC178
0	0	0	0	0	S	2954722	Bacillus sp. PS217		0	0	0	0	0	S1	1415165	Bacillus amyloliquefaciens LFB112		0	0	0	0	0	S1	1415165	Bacillus amyloliquefaciens LFB112
0	0	0	0	0	S	2954723	Bacillus sp. PS237		0	0	0	0	0	S1	1434324	Bacillus amyloliquefaciens UMAF6614		0	0	0	0	0	S1	1434324	Bacillus amyloliquefaciens UMAF6614
0	0	0	1	1	S	2954725	Bacillus sp. PS108		0	0	0	3	3	S	659243	Bacillus siamensis		0	0	0	3	3	S	659243	Bacillus siamensis
0	0	0	0	0	S	2962681	Bacillus sp. KRF7		14	0.01	14	125	99	S	1452	Bacillus atrophaeus		14	0.01	14	125	99	S	1452	Bacillus atrophaeus
0	0	0	1	1	S	2975293	Bacillus sp. FSL K6-1560		0	0	0	0	0	S1	720555	Bacillus atrophaeus 1942		0	0	0	0	0	S1	720555	Bacillus atrophaeus 1942
0	0	0	0	0	S	2975294	Bacillus sp. FSL K6-2861		0	0	0	0	0	S1	1239783	Bacillus atrophaeus UCMB-5137		0	0	0	0	0	S1	1239783	Bacillus atrophaeus UCMB-5137
0	0	0	0	0	S	2582827	Bacillus sp. KBS0812		0	0	0	0	0	S1	1529886	Bacillus atrophaeus subsp. globigii		0	0	0	0	0	S1	1529886	Bacillus atrophaeus subsp. globigii
0	0	0	0	0	S	2049935	Bacillus sp. Lzh-5		9	0	9	70	59	S	1648923	Bacillus paralicheniformis		9	0	9	70	59	S	1648923	Bacillus paralicheniformis
0	0	0	0	0	S	2070759	Bacillus sp. MBGLi79		0	0	0	0	0	S1	766760	Bacillus paralicheniformis ATCC 9945a		0	0	0	0	0	S1	766760	Bacillus paralicheniformis ATCC 9945a
0	0	0	0	0	S	2080759	Bacillus sp. DU-106		5	0	5	37	29	S	1402	Bacillus licheniformis		5	0	5	37	29	S	1402	Bacillus licheniformis
0	0	0	0	0	S	2093834	Bacillus sp. ZY-1-1		0	0	0	0	0	S1	279010	Bacillus licheniformis DSM 13 = ATCC 14580		0	0	0	0	0	S1	279010	Bacillus licheniformis DSM 13 = ATCC 14580
0	0	0	0	0	S	2231056	Bacillus sp. CR71		0	0	0	0	0	S1	1126218	Bacillus licheniformis WX-02		0	0	0	0	0	S1	1126218	Bacillus licheniformis WX-02
0	0	0	0	0	S	2233998	Bacillus sp. COPE52		4	0	4	26	21	S	227866	Bacillus tequilensis		4	0	4	26	21	S	227866	Bacillus tequilensis
0	0	0	0	0	S	2267265	Bacillus sp. DM2		3	0	3	37	28	S	483913	Bacillus inaquosorum		3	0	3	37	28	S	483913	Bacillus inaquosorum
0	0	0	0	0	S	2448811	Bacillus sp. WR11		3	0	0	30	27	G2	653388	Bacillus mojavensis subgroup		3	0	0	30	27	G2	653388	Bacillus mojavensis subgroup
0	0	0	2	2	S	2499213	Bacillus sp. BD59S		3	0	3	26	24	S	260554	Bacillus halotolerans		3	0	3	26	24	S	260554	Bacillus halotolerans
0	0	0	1	1	S	2529386	Bacillus sp. SYJ		0	0	0	4	3	S	72360	Bacillus mojavensis		0	0	0	4	3	S	72360	Bacillus mojavensis
0	0	0	0	0	S	2576356	Bacillus sp. FDAARGOS_527		1	0	1	31	27	S	72361	Bacillus vallismortis		1	0	1	31	27	S	72361	Bacillus vallismortis
0	0	0	0	0	S	2026248	Bacillus sp. 1s-1		1	0	0	25	22	S	96241	Bacillus spizizenii		1	0	0	25	22	S	96241	Bacillus spizizenii
0	0	0	0	0	S	2585772	Bacillus sp. HNA3		1	0	1	2	2	S1	1052585	Bacillus spizizenii TU-B-10		1	0	1	2	2	S1	1052585	Bacillus spizizenii TU-B-10
0	0	0	4	3	S	2589818	Bacillus sp. Cs-700		0	0	0	0	0	S1	655816	Bacillus spizizenii str. W23		0	0	0	0	0	S1	655816	Bacillus spizizenii str. W23
0	0	0	0	0	S	2608254	Bacillus sp. BS98		0	0	0	0	0	S1	703612	Bacillus spizizenii ATCC 6633 = JCM 2499		0	0	0	0	0	S1	703612	Bacillus spizizenii ATCC 6633 = JCM 2499
0	0	0	0	0	S	2660750	Bacillus sp. A260		1	0	1	10	10	S	2054641	Bacillus stercoris		1	0	1	10	10	S	2054641	Bacillus stercoris
0	0	0	0	0	S	2665175	Bacillus sp. AM1(2019)		0	0	0	3	1	S	119858	Bacillus sonorensis		0	0	0	3	1	S	119858	Bacillus sonorensis
0	0	0	6	5	S	2682541	Bacillus sp. N1-1		16	0.01	14	127	105	S	1471	Bacillus methanolicus		16	0.01	14	127	105	S	1471	Bacillus methanolicus
0	0	0	0	0	S	2683680	Bacillus sp. ms-22		2	0	2	28	24	S1	796606	Bacillus methanolicus MGA3		2	0	2	28	24	S1	796606	Bacillus methanolicus MGA3
0	0	0	0	0	S	2709781	Bacillus sp. LUNF1		14	0.01	0	103	83	G1	1792192	Bacillus altitudinis complex		14	0.01	0	103	83	G1	1792192	Bacillus altitudinis complex
0	0	0	6	6	S	2709784	Bacillus sp. KH172YL63		14	0.01	14	103	83	S	293387	Bacillus altitudinis		14	0.01	14	103	83	S	293387	Bacillus altitudinis
0	0	0	0	0	S	2762326	Bacillus sp. PAMC22265		13	0.01	13	114	88	S	1479	Bacillus smithii		13	0.01	13	114	88	S	1479	Bacillus smithii
0	0	0	0	0	S	1570330	Bacillus sp. BH072		10	0	10	124	107	S	2672567	Bacillus aquiflavi		10	0	10	124	107	S	2672567	Bacillus aquiflavi
0	0	0	0	0	S	393065	Bacillus sp. E25		9	0	9	157	137	S	1983719	Bacillus shivajii		9	0	9	157	137	S	1983719	Bacillus shivajii
0	0	0	16	16	S	486398	Bacillus sp. S3		8	0	8	60	56	S	561879	Bacillus safensis		8	0	8	60	56	S	561879	Bacillus safensis
0	0	0	0	0	S	563169	Bacillus sp. SJ-10		0	0	0	0	0	S1	1178541	Bacillus safensis FO-36b		0	0	0	0	0	S1	1178541	Bacillus safensis FO-36b
0	0	0	0	0	S	580459	Bacillus sp. 3a		8	0	8	117	96	S	1547283	Bacillus weihaiensis		8	0	8	117	96	S	1547283	Bacillus weihaiensis
0	0	0	0	0	S	745774	Bacillus sp. K1		7	0	7	55	50	S	1925020	Bacillus swezeyi		7	0	7	55	50	S	1925020	Bacillus swezeyi
0	0	0	0	0	S	756828	Bacillus sp. WP8		7	0	7	114	90	S	86663	Bacillus carboniphilus		7	0	7	114	90	S	86663	Bacillus carboniphilus
0	0	0	0	0	S	1027627	Bacillus sp. BAC		6	0	0	133	119	S	324767	Bacillus infantis		6	0	0	133	119	S	324767	Bacillus infantis
0	0	0	7	3	S	1071078	Bacillus sp. NSP9.1		6	0	6	133	119	S1	1367477	Bacillus infantis NRRL B-14911		6	0	6	133	119	S1	1367477	Bacillus infantis NRRL B-14911
0	0	0	0	0	S	1127744	Bacillus sp. JS		6	0	6	117	96	S	1408	Bacillus pumilus		6	0	6	117	96	S	1408	Bacillus pumilus
0	0	0	0	0	S	1167886	Bacillus sp. B28		0	0	0	2	1	S1	315750	Bacillus pumilus SAFR-032		0	0	0	2	1	S1	315750	Bacillus pumilus SAFR-032
0	0	0	0	0	S	1446792	Bacillus sp. Pc3		5	0	5	101	88	S	1441095	Bacillus gobiensis		5	0	5	101	88	S	1441095	Bacillus gobiensis
0	0	0	0	0	S	2762327	Bacillus sp. PAMC28571		5	0	5	117	97	S	2728853	Bacillus fonticola		5	0	5	117	97	S	2728853	Bacillus fonticola
0	0	0	0	0	S	1574141	Bacillus sp. YP1		5	0	5	47	42	S	2819290	Bacillus arachidis		5	0	5	47	42	S	2819290	Bacillus arachidis
0	0	0	0	0	S	1628753	Bacillus sp. LM 4-2		3	0	3	104	83	S	1455	Bacillus badius		3	0	3	104	83	S	1455	Bacillus badius
0	0	0	0	0	S	1774743	Bacillus sp. SDLI1		2	0	2	8	6	S	1178537	Bacillus xiamenensis		2	0	2	8	6	S	1178537	Bacillus xiamenensis
0	0	0	0	0	S	1806216	Bacillus sp. RZ2MS9		2	0	2	15	14	S	2715209	Bacillus rugosus		2	0	2	15	14	S	2715209	Bacillus rugosus
0	0	0	0	0	S	1837130	Bacillus sp. FJAT-14266		1	0	1	32	30	S	1664069	Bacillus glycinifermentans		1	0	1	32	30	S	1664069	Bacillus glycinifermentans
0	0	0	0	0	S	1856406	Bacillus sp. H15-1		1	0	1	15	15	S	2487276	Bacillus cabrialesii		1	0	1	15	15	S	2487276	Bacillus cabrialesii
0	0	0	1	1	S	1868655	Bacillus sp. B25(2016b)		0	0	0	4	4	S	1925021	Bacillus haynesii		0	0	0	4	4	S	1925021	Bacillus haynesii
0	0	0	0	0	S	1941347	Bacillus sp. 275		0	0	0	5	5	S	293388	Bacillus aerius		0	0	0	5	5	S	293388	Bacillus aerius
0	0	0	1	1	S	2009331	Bacillus sp. MD-5		179	0.07	8	2417	2095	G	2675232	Neobacillus		179	0.07	8	2417	2095	G	2675232	Neobacillus
0	0	0	10	10	S	2014076	Bacillus sp. FJAT-42376		126	0.05	5	1741	1495	G1	2675272	unclassified Neobacillus		126	0.05	5	1741	1495	G1	2675272	unclassified Neobacillus
0	0	0	0	0	S	2921479	Bacillus sp. FSL K6-2837		14	0.01	14	106	84	S	3070676	Neobacillus sp. PS2-9		14	0.01	14	106	84	S	3070676	Neobacillus sp. PS2-9
0	0	0	3	2	S	2921397	Bacillus sp. FSL H8-0516		11	0	11	126	103	S	3047873	Neobacillus sp. WH10		11	0	11	126	103	S	3047873	Neobacillus sp. WH10
0	0	0	0	0	S	2921409	Bacillus sp. FSL K6-0046		11	0	11	127	103	S	3070678	Neobacillus sp. PS3-34		11	0	11	127	103	S	3070678	Neobacillus sp. PS3-34
0	0	0	0	0	S	2921422	Bacillus sp. FSL K6-0138		11	0	11	143	119	S	3070679	Neobacillus sp. PS3-40		11	0	11	143	119	S	3070679	Neobacillus sp. PS3-40
0	0	0	0	0	S	2921436	Bacillus sp. FSL H7-0578		10	0	10	118	104	S	2954672	Neobacillus sp. FSL H8-0543		10	0	10	118	104	S	2954672	Neobacillus sp. FSL H8-0543
0	0	0	0	0	S	2921454	Bacillus sp. FSL K6-0923		10	0	10	94	83	S	3047871	Neobacillus sp. DY30		10	0	10	94	83	S	3047871	Neobacillus sp. DY30
0	0	0	0	0	S	2921456	Bacillus sp. FSL K6-0993		10	0	10	171	150	S	3070677	Neobacillus sp. PS3-12		10	0	10	171	150	S	3070677	Neobacillus sp. PS3-12
0	0	0	4	2	S	2921457	Bacillus sp. FSL K6-0994		9	0	9	121	101	S	3047874	Neobacillus sp. YX16		9	0	9	121	101	S	3047874	Neobacillus sp. YX16
0	0	0	0	0	S	2921458	Bacillus sp. FSL K6-1000		9	0	9	102	85	S	3070683	Neobacillus sp. OS1-33		9	0	9	102	85	S	3070683	Neobacillus sp. OS1-33
0	0	0	0	0	S	2921459	Bacillus sp. FSL K6-1033		8	0	8	115	107	S	2963105	Neobacillus sp. Marseille-Q6967		8	0	8	115	107	S	2963105	Neobacillus sp. Marseille-Q6967
0	0	0	0	0	S	2921462	Bacillus sp. FSL K6-1109		7	0	7	88	80	S	3047875	Neobacillus sp. SuZ13		7	0	7	88	80	S	3047875	Neobacillus sp. SuZ13
0	0	0	0	0	S	2921470	Bacillus sp. FSL K6-1366		5	0	5	103	94	S	3070682	Neobacillus sp. OS1-32		5	0	5	103	94	S	3070682	Neobacillus sp. OS1-32
0	0	0	0	0	S	2912825	Bacillus sp. Man122		4	0	4	175	151	S	3048535	Neobacillus sp. 114		4	0	4	175	151	S	3048535	Neobacillus sp. 114
0	0	0	0	0	S	2921481	Bacillus sp. FSL K6-2841		2	0	2	62	53	S	3070680	Neobacillus sp. OS1-2		2	0	2	62	53	S	3070680	Neobacillus sp. OS1-2
0	0	0	0	0	S	2921488	Bacillus sp. FSL K6-3149		14	0.01	14	140	119	S	220687	Neobacillus novalis		14	0.01	14	140	119	S	220687	Neobacillus novalis
0	0	0	0	0	S	2921496	Bacillus sp. FSL K6-3200		11	0	11	151	134	S	1740721	Neobacillus cucumis		11	0	11	151	134	S	1740721	Neobacillus cucumis
0	0	0	0	0	S	2921507	Bacillus sp. FSL K6-4563		10	0	10	140	124	S	220684	Neobacillus drentensis		10	0	10	140	124	S	220684	Neobacillus drentensis
0	0	0	0	0	S	2921517	Bacillus sp. FSL L8-0167		10	0	10	150	138	S	1193713	Neobacillus mesonae		10	0	10	150	138	S	1193713	Neobacillus mesonae
0	0	0	0	0	S	2921520	Bacillus sp. FSL L8-0193		142	0.06	38	2046	1766	G	400634	Lysinibacillus		142	0.06	38	2046	1766	G	400634	Lysinibacillus
0	0	0	0	0	S	2921523	Bacillus sp. FSL L8-0528		42	0.02	10	660	559	G1	2636778	unclassified Lysinibacillus		42	0.02	10	660	559	G1	2636778	unclassified Lysinibacillus
0	0	0	0	0	S	2921526	Bacillus sp. FSL L8-0654		6	0	6	96	81	S	2169540	Lysinibacillus sp. 2017		6	0	6	96	81	S	2169540	Lysinibacillus sp. 2017
0	0	0	0	0	S	2921527	Bacillus sp. FSL L8-0661		4	0	4	22	11	S	2921411	Lysinibacillus sp. FSL K6-0057		4	0	4	22	11	S	2921411	Lysinibacillus sp. FSL K6-0057
0	0	0	1	1	S	2921528	Bacillus sp. FSL M7-0003		3	0	3	95	79	S	2070463	Lysinibacillus sp. SGAir0095		3	0	3	95	79	S	2070463	Lysinibacillus sp. SGAir0095
0	0	0	1	1	S	2842458	Bacillus sp. JNUCC-24		3	0	3	43	38	S	2936682	Lysinibacillus sp. Ag94		3	0	3	43	38	S	2936682	Lysinibacillus sp. Ag94
0	0	0	0	0	S	2762328	Bacillus sp. PAMC28748		2	0	2	14	13	S	3122488	Lysinibacillus sp. Y5S-8		2	0	2	14	13	S	3122488	Lysinibacillus sp. Y5S-8
0	0	0	0	0	S	2762329	Bacillus sp. PAMC26543		2	0	2	12	11	S	2921720	Lysinibacillus sp. FSL P2-0066		2	0	2	12	11	S	2921720	Lysinibacillus sp. FSL P2-0066
0	0	0	2	2	S	2789208	Bacillus sp. N447-1		2	0	2	29	25	S	2921393	Lysinibacillus sp. FSL H8-0500		2	0	2	29	25	S	2921393	Lysinibacillus sp. FSL H8-0500
0	0	0	0	0	S	2789210	Bacillus sp. A1(2020)		1	0	1	2	2	S	2072025	Lysinibacillus sp. YS11		1	0	1	2	2	S	2072025	Lysinibacillus sp. YS11
0	0	0	0	0	S	2796141	Bacillus sp. HNR-4		1	0	1	10	10	S	3039426	Lysinibacillus sp. 1 U-2021		1	0	1	10	10	S	3039426	Lysinibacillus sp. 1 U-2021
0	0	0	0	0	S	2809036	Bacillus sp. LJBS06		1	0	1	3	2	S	2954544	Lysinibacillus sp. FSL W7-1291		1	0	1	3	2	S	2954544	Lysinibacillus sp. FSL W7-1291
0	0	0	0	0	S	2812759	Bacillus sp. PDNC022		1	0	1	25	15	S	2921718	Lysinibacillus sp. FSL M8-0337		1	0	1	25	15	S	2921718	Lysinibacillus sp. FSL M8-0337
0	0	0	2	2	S	2821409	Bacillus sp. LJBV19		1	0	1	6	6	S	2921515	Lysinibacillus sp. FSL L8-0126		1	0	1	6	6	S	2921515	Lysinibacillus sp. FSL L8-0126
0	0	0	0	0	S	2831519	Bacillus sp. FS02		1	0	1	8	8	S	2921504	Lysinibacillus sp. FSL K6-4013		1	0	1	8	8	S	2921504	Lysinibacillus sp. FSL K6-4013
0	0	0	0	0	S	2841656	Bacillus sp. ZHX3		1	0	1	10	8	S	2921497	Lysinibacillus sp. FSL K6-3209		1	0	1	10	8	S	2921497	Lysinibacillus sp. FSL K6-3209
0	0	0	0	0	S	2842457	Bacillus sp. JNUCC-22		1	0	1	23	18	S	2892541	Lysinibacillus sp. CD3-6		1	0	1	23	18	S	2892541	Lysinibacillus sp. CD3-6
0	0	0	0	0	S	2921530	Bacillus sp. FSL M7-0307		1	0	1	8	8	S	2792480	Lysinibacillus sp. JNUCC-52		1	0	1	8	8	S	2792480	Lysinibacillus sp. JNUCC-52
0	0	0	1	1	S	2846779	Bacillus sp. NP247		1	0	1	29	27	S	2792479	Lysinibacillus sp. JNUCC-51		1	0	1	29	27	S	2792479	Lysinibacillus sp. JNUCC-51
0	0	0	0	0	S	2851015	Bacillus sp. 7D3		0	0	0	4	4	S	2921465	Lysinibacillus sp. FSL K6-1151		0	0	0	4	4	S	2921465	Lysinibacillus sp. FSL K6-1151
0	0	0	0	0	S	2859227	Bacillus sp. LJBS17		0	0	0	6	6	S	2921415	Lysinibacillus sp. FSL K6-0075		0	0	0	6	6	S	2921415	Lysinibacillus sp. FSL K6-0075
0	0	0	0	0	S	2867004	Bacillus sp. FCW2		0	0	0	10	8	S	2921619	Lysinibacillus sp. FSL M8-0216		0	0	0	10	8	S	2921619	Lysinibacillus sp. FSL M8-0216
0	0	0	0	0	S	2874284	Bacillus sp. CRB-7		0	0	0	4	3	S	2921660	Lysinibacillus sp. FSL R5-0849		0	0	0	4	3	S	2921660	Lysinibacillus sp. FSL R5-0849
0	0	0	0	0	S	2875710	Bacillus sp. PM8313		0	0	0	6	5	S	2913506	Lysinibacillus sp. ACHW1.5		0	0	0	6	5	S	2913506	Lysinibacillus sp. ACHW1.5
0	0	0	0	0	S	2876713	Bacillus sp. 41-22		0	0	0	3	3	S	2921721	Lysinibacillus sp. FSL P4-0201		0	0	0	3	3	S	2921721	Lysinibacillus sp. FSL P4-0201
0	0	0	1	1	S	2884834	Bacillus sp. CMF12		0	0	0	6	6	S	2796169	Lysinibacillus sp. C5.1		0	0	0	6	6	S	2796169	Lysinibacillus sp. C5.1
0	0	0	0	0	S	2888526	Bacillus sp. BC1-43		0	0	0	0	0	S	2968499	Lysinibacillus sp. FN11		0	0	0	0	0	S	2968499	Lysinibacillus sp. FN11
0	0	0	0	0	S	2912260	Bacillus sp. R45		0	0	0	2	2	S	2972483	Lysinibacillus sp. OF-1		0	0	0	2	2	S	2972483	Lysinibacillus sp. OF-1
15	0.02	1	165	130	G1	653685	Bacillus subtilis group		0	0	0	3	3	S	3026425	Lysinibacillus sp. G01H		0	0	0	3	3	S	3026425	Lysinibacillus sp. G01H
3	0	3	22	21	S	1452	Bacillus atrophaeus		0	0	0	3	3	S	2749809	Lysinibacillus sp. JK80		0	0	0	3	3	S	2749809	Lysinibacillus sp. JK80
0	0	0	0	0	S1	720555	Bacillus atrophaeus 1942		0	0	0	0	0	S	3143929	Lysinibacillus sp. BS3		0	0	0	0	0	S	3143929	Lysinibacillus sp. BS3
0	0	0	0	0	S1	1239783	Bacillus atrophaeus UCMB-5137		14	0.01	14	126	83	S	759811	Lysinibacillus pakistanensis		14	0.01	14	126	83	S	759811	Lysinibacillus pakistanensis
0	0	0	0	0	S1	1529886	Bacillus atrophaeus subsp. globigii		9	0	9	122	107	S	2086577	Lysinibacillus timonensis		9	0	9	122	107	S	2086577	Lysinibacillus timonensis
2	0	2	7	7	S	1402	Bacillus licheniformis		7	0	7	90	80	S	28031	Lysinibacillus fusiformis		7	0	7	90	80	S	28031	Lysinibacillus fusiformis
0	0	0	0	0	S1	279010	Bacillus licheniformis DSM 13 = ATCC 14580		7	0	7	103	95	S	1714840	Lysinibacillus telephonicus		7	0	7	103	95	S	1714840	Lysinibacillus telephonicus
0	0	0	1	1	S1	1126218	Bacillus licheniformis WX-02		6	0	6	75	68	S	1421	Lysinibacillus sphaericus		6	0	6	75	68	S	1421	Lysinibacillus sphaericus
2	0	2	9	7	S	72361	Bacillus vallismortis		0	0	0	3	3	S1	444177	Lysinibacillus sphaericus C3-41		0	0	0	3	3	S1	444177	Lysinibacillus sphaericus C3-41
2	0	2	4	4	S	227866	Bacillus tequilensis		5	0	5	54	49	S	436516	Lysinibacillus parviboronicapiens		5	0	5	54	49	S	436516	Lysinibacillus parviboronicapiens
2	0	2	18	11	S	1648923	Bacillus paralicheniformis		5	0	5	47	40	S	2115968	Lysinibacillus capsici		5	0	5	47	40	S	2115968	Lysinibacillus capsici
0	0	0	0	0	S1	766760	Bacillus paralicheniformis ATCC 9945a		3	0	3	65	63	S	1470088	Lysinibacillus louembei		3	0	3	65	63	S	1470088	Lysinibacillus louembei
2	0	1	41	28	G2	1938374	Bacillus amyloliquefaciens group		3	0	3	59	54	S	2590012	Lysinibacillus agricola		3	0	3	59	54	S	2590012	Lysinibacillus agricola
1	0	1	19	14	S	492670	Bacillus velezensis		1	0	1	30	27	S	33935	Lysinibacillus macroides		1	0	1	30	27	S	33935	Lysinibacillus macroides
0	0	0	0	0	S1	326423	Bacillus velezensis FZB42		1	0	1	9	7	S	1145276	Lysinibacillus varians		1	0	1	9	7	S	1145276	Lysinibacillus varians
0	0	0	0	0	S1	1114958	Bacillus velezensis CAU B946		1	0	1	57	40	S	2998077	Lysinibacillus irui		1	0	1	57	40	S	2998077	Lysinibacillus irui
0	0	0	0	0	S1	1150475	Bacillus velezensis UCMB5036		119	0.05	26	1502	1305	G	2800373	Priestia		119	0.05	26	1502	1305	G	2800373	Priestia
0	0	0	0	0	S1	1150476	Bacillus velezensis UCMB5113		54	0.02	53	636	539	S	1404	Priestia megaterium		54	0.02	53	636	539	S	1404	Priestia megaterium
0	0	0	0	0	S1	1155777	Bacillus velezensis YAU B9601-Y2		1	0	1	9	9	S1	1138452	Priestia megaterium NCT-2		1	0	1	9	9	S1	1138452	Priestia megaterium NCT-2
0	0	0	0	0	S1	1225788	Bacillus velezensis AS43.3		0	0	0	0	0	S1	545693	Priestia megaterium QM B1551		0	0	0	0	0	S1	545693	Priestia megaterium QM B1551
0	0	0	0	0	S1	1338518	Bacillus velezensis UCMB5033		0	0	0	5	5	S1	592022	Priestia megaterium DSM 319		0	0	0	5	5	S1	592022	Priestia megaterium DSM 319
0	0	0	0	0	S1	1385727	Bacillus velezensis NAU-B3		0	0	0	3	3	S1	1006007	Priestia megaterium WSH-002		0	0	0	3	3	S1	1006007	Priestia megaterium WSH-002
0	0	0	0	0	S1	1423138	Bacillus velezensis SQR9		0	0	0	0	0	S1	1348623	Priestia megaterium NBRC 15308 = ATCC 14581		0	0	0	0	0	S1	1348623	Priestia megaterium NBRC 15308 = ATCC 14581
0	0	0	0	0	S1	1449088	Bacillus velezensis TrigoCor1448		0	0	0	9	8	S1	1452722	Priestia megaterium Q3		0	0	0	9	8	S1	1452722	Priestia megaterium Q3
0	0	0	0	0	S1	1458206	Bacillus velezensis NJN-6		18	0.01	18	181	168	S	1402861	Priestia filamentosa		18	0.01	18	181	168	S	1402861	Priestia filamentosa
0	0	0	8	3	S	1390	Bacillus amyloliquefaciens		8	0	8	136	121	S	86664	Priestia flexa		8	0	8	136	121	S	86664	Priestia flexa
0	0	0	0	0	S1	692420	Bacillus amyloliquefaciens DSM 7 = ATCC 23350		8	0	8	131	107	S	284581	Priestia koreensis		8	0	8	131	107	S	284581	Priestia koreensis
0	0	0	0	0	S1	999891	Bacillus amyloliquefaciens TA208		5	0	5	90	84	S	412384	Priestia aryabhattai		5	0	5	90	84	S	412384	Priestia aryabhattai
0	0	0	0	0	S1	1001582	Bacillus amyloliquefaciens LL3		0	0	0	4	4	G1	2800374	unclassified Priestia		0	0	0	4	4	G1	2800374	unclassified Priestia
0	0	0	0	0	S1	1034836	Bacillus amyloliquefaciens XH7		0	0	0	4	4	S	2886505	Priestia sp. J2		0	0	0	4	4	S	2886505	Priestia sp. J2
0	0	0	0	0	S1	1091041	Bacillus amyloliquefaciens IT-45		91	0.04	28	1190	1019	G	84406	Virgibacillus		91	0.04	28	1190	1019	G	84406	Virgibacillus
0	0	0	0	0	S1	1292358	Bacillus amyloliquefaciens KHG19		20	0.01	20	139	113	S	1482	Virgibacillus halodenitrificans		20	0.01	20	139	113	S	1482	Virgibacillus halodenitrificans
0	0	0	0	0	S1	1333538	Bacillus amyloliquefaciens UMAF6639		17	0.01	0	312	278	G1	2620237	unclassified Virgibacillus		17	0.01	0	312	278	G1	2620237	unclassified Virgibacillus
0	0	0	0	0	S1	1412898	Bacillus amyloliquefaciens CC178		7	0	7	91	78	S	2831673	Virgibacillus sp. NKC19-16		7	0	7	91	78	S	2831673	Virgibacillus sp. NKC19-16
0	0	0	0	0	S1	1415165	Bacillus amyloliquefaciens LFB112		5	0	5	98	91	S	2700081	Virgibacillus sp. MSP4-1		5	0	5	98	91	S	2700081	Virgibacillus sp. MSP4-1
0	0	0	0	0	S1	1434324	Bacillus amyloliquefaciens UMAF6614		2	0	2	45	36	S	2419841	Virgibacillus sp. Bac330		2	0	2	45	36	S	2419841	Virgibacillus sp. Bac330
0	0	0	0	0	S	659243	Bacillus siamensis		2	0	2	25	25	S	2419842	Virgibacillus sp. Bac332		2	0	2	25	25	S	2419842	Virgibacillus sp. Bac332
1	0	1	17	15	S	1423	Bacillus subtilis		1	0	1	41	38	S	403957	Virgibacillus sp. SK37		1	0	1	41	38	S	403957	Virgibacillus sp. SK37
0	0	0	0	0	S1	86029	Bacillus subtilis subsp. natto		0	0	0	12	10	S	1911587	Virgibacillus sp. 6R		0	0	0	12	10	S	1911587	Virgibacillus sp. 6R
0	0	0	0	0	S2	645657	Bacillus subtilis subsp. natto BEST195		10	0	10	114	101	S	163877	Virgibacillus necropolis		10	0	10	114	101	S	163877	Virgibacillus necropolis
0	0	0	2	2	S1	135461	Bacillus subtilis subsp. subtilis		8	0	8	108	94	S	1216297	Virgibacillus natechei		8	0	8	108	94	S	1216297	Virgibacillus natechei
0	0	0	0	0	S2	224308	Bacillus subtilis subsp. subtilis str. 168		6	0	6	95	80	S	2017483	Virgibacillus phasianinus		6	0	6	95	80	S	2017483	Virgibacillus phasianinus
0	0	0	0	0	S2	535024	Bacillus subtilis subsp. subtilis str. SMY		2	0	2	34	26	S	302167	Virgibacillus dokdonensis		2	0	2	34	26	S	302167	Virgibacillus dokdonensis
0	0	0	0	0	S2	535025	Bacillus subtilis subsp. subtilis str. JH642		0	0	0	9	7	S	1473	Virgibacillus pantothenticus		0	0	0	9	7	S	1473	Virgibacillus pantothenticus
0	0	0	0	0	S3	1232554	Bacillus subtilis subsp. subtilis str. JH642 substr. AG174		0	0	0	10	9	S	447199	Virgibacillus salarius		0	0	0	10	9	S	447199	Virgibacillus salarius
0	0	0	0	0	S2	535026	Bacillus subtilis subsp. subtilis NCIB 3610 = ATCC 6051 = DSM 10		69	0.03	14	983	864	G	2675230	Cytobacillus		69	0.03	14	983	864	G	2675230	Cytobacillus
0	0	0	0	0	S3	1147161	Bacillus subtilis subsp. subtilis 6051-HGW		12	0	12	175	153	S	1399	Cytobacillus firmus		12	0	12	175	153	S	1399	Cytobacillus firmus
0	0	0	0	0	S2	1052588	Bacillus subtilis subsp. subtilis str. RO-NN-1		11	0	11	123	114	S	2901381	Cytobacillus spongiae		11	0	11	123	114	S	2901381	Cytobacillus spongiae
0	0	0	0	0	S2	1192196	Bacillus subtilis subsp. subtilis str. BSP1		9	0	9	146	120	S	1637975	Cytobacillus solani		9	0	9	146	120	S	1637975	Cytobacillus solani
0	0	0	0	0	S2	1221328	Bacillus subtilis subsp. subtilis str. AG1839		9	0	9	116	108	S	1742359	Cytobacillus dafuensis		9	0	9	116	108	S	1742359	Cytobacillus dafuensis
0	0	0	0	0	S2	1302650	Bacillus subtilis subsp. subtilis str. BAB-1		7	0	7	105	95	S	859144	Cytobacillus gottheilii		7	0	7	105	95	S	859144	Cytobacillus gottheilii
0	0	0	0	0	S2	1404258	Bacillus subtilis subsp. subtilis str. OH 131.1		5	0	3	57	53	S	665099	Cytobacillus oceanisediminis		5	0	3	57	53	S	665099	Cytobacillus oceanisediminis
0	0	0	0	0	S1	936156	Bacillus subtilis BSn5		2	0	2	19	17	S1	1196031	Cytobacillus oceanisediminis 2691		2	0	2	19	17	S1	1196031	Cytobacillus oceanisediminis 2691
0	0	0	0	0	S1	1136873	Bacillus subtilis KCTC 1028 = ATCC 6051a		2	0	2	13	11	S	3051614	Cytobacillus pseudoceanisediminis		2	0	2	13	11	S	3051614	Cytobacillus pseudoceanisediminis
0	0	0	0	0	S1	1204342	Bacillus subtilis BEST7003		0	0	0	16	15	S	859143	Cytobacillus kochii		0	0	0	16	15	S	859143	Cytobacillus kochii
0	0	0	0	0	S1	1220533	Bacillus subtilis QB928		0	0	0	18	14	G1	2675268	unclassified Cytobacillus		0	0	0	18	14	G1	2675268	unclassified Cytobacillus
0	0	0	0	0	S1	1233100	Bacillus subtilis XF-1		0	0	0	18	14	S	2921700	Cytobacillus sp. FSL W7-1323		0	0	0	18	14	S	2921700	Cytobacillus sp. FSL W7-1323
0	0	0	0	0	S1	1340494	Bacillus subtilis TO-A		69	0.03	18	1114	963	G	2675229	Peribacillus		69	0.03	18	1114	963	G	2675229	Peribacillus
0	0	0	0	0	S1	1415167	Bacillus subtilis PY79		14	0.01	14	235	196	S	450367	Peribacillus frigoritolerans		14	0.01	14	235	196	S	450367	Peribacillus frigoritolerans
0	0	0	0	0	S1	1453990	Bacillus subtilis HJ5		9	0	9	96	87	S	1407	Peribacillus psychrosaccharolyticus		9	0	9	96	87	S	1407	Peribacillus psychrosaccharolyticus
0	0	0	5	4	S	96241	Bacillus spizizenii		8	0	6	148	133	S	1478	Peribacillus simplex		8	0	6	148	133	S	1478	Peribacillus simplex
0	0	0	0	0	S1	655816	Bacillus spizizenii str. W23		2	0	2	23	21	S1	1349754	Peribacillus simplex NBRC 15720 = DSM 1321		2	0	2	23	21	S1	1349754	Peribacillus simplex NBRC 15720 = DSM 1321
0	0	0	0	0	S1	703612	Bacillus spizizenii ATCC 6633 = JCM 2499		8	0	0	134	118	G1	2675266	unclassified Peribacillus		8	0	0	134	118	G1	2675266	unclassified Peribacillus
0	0	0	2	2	S1	1052585	Bacillus spizizenii TU-B-10		3	0	3	55	49	S	2921364	Peribacillus sp. FSL E2-0218		3	0	3	55	49	S	2921364	Peribacillus sp. FSL E2-0218
0	0	0	0	0	S	119858	Bacillus sonorensis		3	0	3	25	20	S	2975289	Peribacillus sp. FSL E2-0159		3	0	3	25	20	S	2975289	Peribacillus sp. FSL E2-0159
0	0	0	7	7	S	483913	Bacillus inaquosorum		2	0	2	14	14	S	2921573	Peribacillus sp. FSL P2-0133		2	0	2	14	14	S	2921573	Peribacillus sp. FSL P2-0133
0	0	0	16	15	G2	653388	Bacillus mojavensis subgroup		0	0	0	40	35	S	3073271	Peribacillus sp. R9-11		0	0	0	40	35	S	3073271	Peribacillus sp. R9-11
0	0	0	4	4	S	72360	Bacillus mojavensis		5	0	5	186	148	S	228899	Peribacillus asahii		5	0	5	186	148	S	228899	Peribacillus asahii
0	0	0	12	11	S	260554	Bacillus halotolerans		5	0	5	54	46	S	264697	Peribacillus muralis		5	0	5	54	46	S	264697	Peribacillus muralis
0	0	0	3	3	S	2054641	Bacillus stercoris		2	0	2	23	21	S	421767	Peribacillus butanolivorans		2	0	2	23	21	S	421767	Peribacillus butanolivorans
6	0.01	0	22	12	G1	1792192	Bacillus altitudinis complex		69	0.03	12	926	776	G	2837506	Niallia		69	0.03	12	926	776	G	2837506	Niallia
6	0.01	6	22	12	S	293387	Bacillus altitudinis		18	0.01	18	204	165	S	1737571	Niallia oryzisoli		18	0.01	18	204	165	S	1737571	Niallia oryzisoli
3	0	3	18	11	S	1455	Bacillus badius		16	0.01	0	313	262	G1	2837522	unclassified Niallia		16	0.01	0	313	262	G1	2837522	unclassified Niallia
3	0	3	22	17	S	2672567	Bacillus aquiflavi		8	0	8	88	64	S	2962858	Niallia sp. RD1		8	0	8	88	64	S	2962858	Niallia sp. RD1
3	0	3	12	12	S	1925020	Bacillus swezeyi		5	0	5	108	95	S	2912824	Niallia sp. Man26		5	0	5	108	95	S	2912824	Niallia sp. Man26
2	0	1	16	13	S	1471	Bacillus methanolicus		3	0	3	117	103	S	3082444	Niallia sp. XMNu-256		3	0	3	117	103	S	3082444	Niallia sp. XMNu-256
1	0	1	4	4	S1	796606	Bacillus methanolicus MGA3		12	0	12	104	88	S	2499688	Niallia taxi		12	0	12	104	88	S	2499688	Niallia taxi
2	0	2	40	32	S	1983719	Bacillus shivajii		11	0	11	204	180	S	1397	Niallia circulans		11	0	11	204	180	S	1397	Niallia circulans
1	0	1	21	19	S	1408	Bacillus pumilus		68	0.03	16	1005	846	G	182709	Oceanobacillus		68	0.03	16	1005	846	G	182709	Oceanobacillus
0	0	0	1	1	S1	315750	Bacillus pumilus SAFR-032		24	0.01	8	405	353	G1	2630292	unclassified Oceanobacillus		24	0.01	8	405	353	G1	2630292	unclassified Oceanobacillus
1	0	1	21	15	S	2728853	Bacillus fonticola		7	0	7	105	91	S	2921503	Oceanobacillus sp. FSL K6-3682		7	0	7	105	91	S	2921503	Oceanobacillus sp. FSL K6-3682
1	0	0	18	18	S	324767	Bacillus infantis		3	0	3	81	73	S	2954748	Oceanobacillus sp. FSL K6-2867		3	0	3	81	73	S	2954748	Oceanobacillus sp. FSL K6-2867
1	0	1	18	18	S1	1367477	Bacillus infantis NRRL B-14911		2	0	2	26	25	S	2921698	Oceanobacillus sp. FSL W7-1281		2	0	2	26	25	S	2921698	Oceanobacillus sp. FSL W7-1281
0	0	0	8	7	S	2819290	Bacillus arachidis		2	0	2	24	22	S	2975322	Oceanobacillus sp. FSL W7-1304		2	0	2	24	22	S	2975322	Oceanobacillus sp. FSL W7-1304
0	0	0	1	1	S	2715209	Bacillus rugosus		1	0	1	20	18	S	2921420	Oceanobacillus sp. FSL K6-0127		1	0	1	20	18	S	2921420	Oceanobacillus sp. FSL K6-0127
0	0	0	1	1	S	2487276	Bacillus cabrialesii		1	0	1	18	17	S	2921699	Oceanobacillus sp. FSL W7-1293		1	0	1	18	17	S	2921699	Oceanobacillus sp. FSL W7-1293
0	0	0	0	0	S	1925021	Bacillus haynesii		11	0	11	122	100	S	2052660	Oceanobacillus zhaokaii		11	0	11	122	100	S	2052660	Oceanobacillus zhaokaii
0	0	0	3	3	S	1664069	Bacillus glycinifermentans		7	0	0	90	75	S	746691	Oceanobacillus kimchii		7	0	0	90	75	S	746691	Oceanobacillus kimchii
0	0	0	20	20	S	1547283	Bacillus weihaiensis		7	0	7	90	75	S1	1238184	Oceanobacillus kimchii X50		7	0	7	90	75	S1	1238184	Oceanobacillus kimchii X50
0	0	0	28	19	S	1441095	Bacillus gobiensis		5	0	0	67	44	S	182710	Oceanobacillus iheyensis		5	0	0	67	44	S	182710	Oceanobacillus iheyensis
0	0	0	1	1	S	1178537	Bacillus xiamenensis		5	0	5	67	44	S1	221109	Oceanobacillus iheyensis HTE831		5	0	5	67	44	S1	221109	Oceanobacillus iheyensis HTE831
0	0	0	14	13	S	561879	Bacillus safensis		4	0	4	87	77	S	1462527	Oceanobacillus jeddahense		4	0	4	87	77	S	1462527	Oceanobacillus jeddahense
0	0	0	0	0	S1	1178541	Bacillus safensis FO-36b		1	0	1	28	25	S	545501	Oceanobacillus oncorhynchi		1	0	1	28	25	S	545501	Oceanobacillus oncorhynchi
0	0	0	2	1	S	293388	Bacillus aerius		67	0.03	17	912	773	G	2675233	Metabacillus		67	0.03	17	912	773	G	2675233	Metabacillus
0	0	0	43	28	S	86663	Bacillus carboniphilus		33	0.01	9	395	332	G1	2675274	unclassified Metabacillus		33	0.01	9	395	332	G1	2675274	unclassified Metabacillus
0	0	0	10	10	S	1479	Bacillus smithii		8	0	8	75	65	S	2806989	Metabacillus sp. cB07		8	0	8	75	65	S	2806989	Metabacillus sp. cB07
31	0.03	2	410	351	G	2675232	Neobacillus		6	0	6	92	72	S	3117746	Metabacillus sp. FJAT-52054		6	0	6	92	72	S	3117746	Metabacillus sp. FJAT-52054
26	0.03	0	317	263	G1	2675272	unclassified Neobacillus		5	0	5	36	29	S	2897333	Metabacillus sp. B2-18		5	0	5	36	29	S	2897333	Metabacillus sp. B2-18
5	0.01	5	19	16	S	3047873	Neobacillus sp. WH10		5	0	5	27	25	S	3117747	Metabacillus sp. FJAT-53654		5	0	5	27	25	S	3117747	Metabacillus sp. FJAT-53654
4	0	4	22	14	S	3070683	Neobacillus sp. OS1-33		0	0	0	22	22	S	2745198	Metabacillus sp. KUDC1714		0	0	0	22	22	S	2745198	Metabacillus sp. KUDC1714
3	0	3	23	20	S	3047874	Neobacillus sp. YX16		0	0	0	11	9	S	3048891	Metabacillus sp. CT-WN-B3		0	0	0	11	9	S	3048891	Metabacillus sp. CT-WN-B3
3	0	3	20	20	S	3070682	Neobacillus sp. OS1-32		8	0	8	114	93	S	2567941	Metabacillus sediminilitoris		8	0	8	114	93	S	2567941	Metabacillus sediminilitoris
2	0	2	18	17	S	2954672	Neobacillus sp. FSL H8-0543		4	0	4	69	62	S	152268	Metabacillus litoralis		4	0	4	69	62	S	152268	Metabacillus litoralis
2	0	2	22	19	S	2963105	Neobacillus sp. Marseille-Q6967		4	0	4	19	14	S	2874282	Metabacillus dongyingensis		4	0	4	19	14	S	2874282	Metabacillus dongyingensis
2	0	2	22	17	S	3047875	Neobacillus sp. SuZ13		1	0	1	49	44	S	1535204	Metabacillus endolithicus		1	0	1	49	44	S	1535204	Metabacillus endolithicus
2	0	2	40	33	S	3070677	Neobacillus sp. PS3-12		60	0.02	6	750	633	G	45667	Halobacillus		60	0.02	6	750	633	G	45667	Halobacillus
2	0	2	25	14	S	3070679	Neobacillus sp. PS3-40		13	0.01	13	161	137	S	45668	Halobacillus litoralis		13	0.01	13	161	137	S	45668	Halobacillus litoralis
1	0	1	23	22	S	3047871	Neobacillus sp. DY30		13	0.01	13	110	89	S	2932257	Halobacillus salinarum		13	0.01	13	110	89	S	2932257	Halobacillus salinarum
0	0	0	24	21	S	3048535	Neobacillus sp. 114		8	0	8	110	76	S	1570	Halobacillus halophilus		8	0	8	110	76	S	1570	Halobacillus halophilus
0	0	0	9	9	S	3070676	Neobacillus sp. PS2-9		0	0	0	0	0	S1	866895	Halobacillus halophilus DSM 2266		0	0	0	0	0	S1	866895	Halobacillus halophilus DSM 2266
0	0	0	12	12	S	3070678	Neobacillus sp. PS3-34		7	0	7	72	67	S	402384	Halobacillus mangrovi		7	0	7	72	67	S	402384	Halobacillus mangrovi
0	0	0	24	15	S	3070680	Neobacillus sp. OS1-2		7	0	7	83	69	S	554880	Halobacillus naozhouensis		7	0	7	83	69	S	554880	Halobacillus naozhouensis
2	0	2	16	16	S	220684	Neobacillus drentensis		3	0	3	65	62	S	2932258	Halobacillus shinanisalinarum		3	0	3	65	62	S	2932258	Halobacillus shinanisalinarum
1	0	1	22	20	S	1740721	Neobacillus cucumis		3	0	3	58	52	S	2932259	Halobacillus amylolyticus		3	0	3	58	52	S	2932259	Halobacillus amylolyticus
0	0	0	23	21	S	220687	Neobacillus novalis		0	0	0	6	6	G1	2636472	unclassified Halobacillus		0	0	0	6	6	G1	2636472	unclassified Halobacillus
0	0	0	19	19	S	1193713	Neobacillus mesonae		0	0	0	6	6	S	3052090	Halobacillus sp. ACCC02827		0	0	0	6	6	S	3052090	Halobacillus sp. ACCC02827
30	0.03	5	428	365	G	400634	Lysinibacillus		54	0.02	29	659	517	G	129337	Geobacillus		54	0.02	29	659	517	G	129337	Geobacillus
17	0.02	4	139	120	G1	2636778	unclassified Lysinibacillus		7	0	7	53	36	S	129338	Geobacillus subterraneus		7	0	7	53	36	S	129338	Geobacillus subterraneus
3	0	3	16	16	S	2070463	Lysinibacillus sp. SGAir0095		6	0	0	46	38	G1	1505648	Geobacillus thermoleovorans group		6	0	0	46	38	G1	1505648	Geobacillus thermoleovorans group
3	0	3	15	12	S	2936682	Lysinibacillus sp. Ag94		4	0	4	17	13	S	33938	Geobacillus thermocatenulatus		4	0	4	17	13	S	33938	Geobacillus thermocatenulatus
3	0	3	7	4	S	2921411	Lysinibacillus sp. FSL K6-0057		2	0	2	10	9	S	33941	Geobacillus thermoleovorans		2	0	2	10	9	S	33941	Geobacillus thermoleovorans
1	0	1	3	3	S	2921720	Lysinibacillus sp. FSL P2-0066		0	0	0	0	0	S1	1111068	Geobacillus thermoleovorans CCB_US3_UF5		0	0	0	0	0	S1	1111068	Geobacillus thermoleovorans CCB_US3_UF5
1	0	1	12	9	S	2792479	Lysinibacillus sp. JNUCC-51		0	0	0	3	3	S	1394	[Bacillus] caldolyticus		0	0	0	3	3	S	1394	[Bacillus] caldolyticus
1	0	1	6	6	S	2921497	Lysinibacillus sp. FSL K6-3209		0	0	0	9	6	S	1462	Geobacillus kaustophilus		0	0	0	9	6	S	1462	Geobacillus kaustophilus
1	0	1	8	7	S	2921393	Lysinibacillus sp. FSL H8-0500		0	0	0	1	1	S1	235909	Geobacillus kaustophilus HTA426		0	0	0	1	1	S1	235909	Geobacillus kaustophilus HTA426
0	0	0	0	0	S	2954544	Lysinibacillus sp. FSL W7-1291		0	0	0	6	3	S1	1220595	Geobacillus kaustophilus NBRC 102445		0	0	0	6	3	S1	1220595	Geobacillus kaustophilus NBRC 102445
0	0	0	6	2	S	2921718	Lysinibacillus sp. FSL M8-0337		3	0	3	25	11	S	860353	Geobacillus proteiniphilus		3	0	3	25	11	S	860353	Geobacillus proteiniphilus
0	0	0	0	0	S	2921721	Lysinibacillus sp. FSL P4-0201		3	0	3	64	54	S	1921421	Geobacillus genomosp. 3		3	0	3	64	54	S	1921421	Geobacillus genomosp. 3
0	0	0	0	0	S	2921504	Lysinibacillus sp. FSL K6-4013		2	0	2	29	23	S	33940	Geobacillus thermodenitrificans		2	0	2	29	23	S	33940	Geobacillus thermodenitrificans
0	0	0	0	0	S	2968499	Lysinibacillus sp. FN11		0	0	0	3	3	S1	420246	Geobacillus thermodenitrificans NG80-2		0	0	0	3	3	S1	420246	Geobacillus thermodenitrificans NG80-2
0	0	0	1	1	S	2972483	Lysinibacillus sp. OF-1		2	0	2	15	9	S	213419	Geobacillus zalihae		2	0	2	15	9	S	213419	Geobacillus zalihae
0	0	0	0	0	S	3026425	Lysinibacillus sp. G01H		2	0	1	83	67	G1	2642459	unclassified Geobacillus		2	0	1	83	67	G1	2642459	unclassified Geobacillus
0	0	0	2	2	S	3039426	Lysinibacillus sp. 1 U-2021		1	0	1	27	22	S	1963025	Geobacillus sp. 46C-IIa		1	0	1	27	22	S	1963025	Geobacillus sp. 46C-IIa
0	0	0	1	1	S	3122488	Lysinibacillus sp. Y5S-8		0	0	0	14	12	S	391290	Geobacillus sp. E263		0	0	0	14	12	S	391290	Geobacillus sp. E263
0	0	0	0	0	S	3143929	Lysinibacillus sp. BS3		0	0	0	1	1	S	550542	Geobacillus sp. Y412MC52		0	0	0	1	1	S	550542	Geobacillus sp. Y412MC52
0	0	0	0	0	S	2921660	Lysinibacillus sp. FSL R5-0849		0	0	0	10	8	S	691437	Geobacillus sp. C56-T3		0	0	0	10	8	S	691437	Geobacillus sp. C56-T3
0	0	0	2	2	S	2921619	Lysinibacillus sp. FSL M8-0216		0	0	0	4	2	S	1233873	Geobacillus sp. GHH01		0	0	0	4	2	S	1233873	Geobacillus sp. GHH01
0	0	0	0	0	S	2921515	Lysinibacillus sp. FSL L8-0126		0	0	0	3	2	S	1813182	Geobacillus sp. JS12		0	0	0	3	2	S	1813182	Geobacillus sp. JS12
0	0	0	0	0	S	2921465	Lysinibacillus sp. FSL K6-1151		0	0	0	1	1	S	1963026	Geobacillus sp. 47C-IIb		0	0	0	1	1	S	1963026	Geobacillus sp. 47C-IIb
0	0	0	0	0	S	2921415	Lysinibacillus sp. FSL K6-0075		0	0	0	0	0	S	2921730	Geobacillus sp. FSL W8-0032		0	0	0	0	0	S	2921730	Geobacillus sp. FSL W8-0032
0	0	0	3	3	S	2913506	Lysinibacillus sp. ACHW1.5		0	0	0	1	1	S	2954597	Geobacillus sp. FSL W8-0026		0	0	0	1	1	S	2954597	Geobacillus sp. FSL W8-0026
0	0	0	2	2	S	2892541	Lysinibacillus sp. CD3-6		0	0	0	3	3	S	2954614	Geobacillus sp. FSL K6-3411		0	0	0	3	3	S	2954614	Geobacillus sp. FSL K6-3411
0	0	0	0	0	S	2796169	Lysinibacillus sp. C5.1		0	0	0	0	0	S	2954744	Geobacillus sp. FSL K6-0789		0	0	0	0	0	S	2954744	Geobacillus sp. FSL K6-0789
0	0	0	1	1	S	2792480	Lysinibacillus sp. JNUCC-52		0	0	0	7	3	S	2975350	Geobacillus sp. FSL W8-0466		0	0	0	7	3	S	2975350	Geobacillus sp. FSL W8-0466
0	0	0	1	1	S	2749809	Lysinibacillus sp. JK80		0	0	0	5	5	S	1422	Geobacillus stearothermophilus		0	0	0	5	5	S	1422	Geobacillus stearothermophilus
0	0	0	15	13	S	2169540	Lysinibacillus sp. 2017		0	0	0	5	5	S1	1366047	Geobacillus stearothermophilus ATCC 12980		0	0	0	5	5	S1	1366047	Geobacillus stearothermophilus ATCC 12980
0	0	0	1	1	S	2072025	Lysinibacillus sp. YS11		44	0.02	8	481	429	G	2837508	Rossellomorea		44	0.02	8	481	429	G	2837508	Rossellomorea
2	0	2	44	24	S	2086577	Lysinibacillus timonensis		19	0.01	19	180	160	S	189381	Rossellomorea marisflavi		19	0.01	19	180	160	S	189381	Rossellomorea marisflavi
1	0	1	16	16	S	28031	Lysinibacillus fusiformis		6	0	6	41	37	S	189382	Rossellomorea aquimaris		6	0	6	41	37	S	189382	Rossellomorea aquimaris
1	0	1	7	7	S	33935	Lysinibacillus macroides		6	0	1	91	88	G1	2837526	unclassified Rossellomorea		6	0	1	91	88	G1	2837526	unclassified Rossellomorea
1	0	1	13	13	S	1470088	Lysinibacillus louembei		2	0	2	15	15	S	2963940	Rossellomorea sp. KS-H15a		2	0	2	15	15	S	2963940	Rossellomorea sp. KS-H15a
1	0	1	18	18	S	1714840	Lysinibacillus telephonicus		2	0	2	16	15	S	3038653	Rossellomorea sp. DA94		2	0	2	16	15	S	3038653	Rossellomorea sp. DA94
1	0	1	11	8	S	2115968	Lysinibacillus capsici		1	0	1	51	50	S	3118174	Rossellomorea sp. y25		1	0	1	51	50	S	3118174	Rossellomorea sp. y25
1	0	1	11	11	S	2998077	Lysinibacillus irui		5	0	5	70	62	S	218284	Rossellomorea vietnamensis		5	0	5	70	62	S	218284	Rossellomorea vietnamensis
0	0	0	13	12	S	1421	Lysinibacillus sphaericus		42	0.02	17	446	351	G	2837511	Sutcliffiella		42	0.02	17	446	351	G	2837511	Sutcliffiella
0	0	0	0	0	S1	444177	Lysinibacillus sphaericus C3-41		14	0.01	14	130	116	S	79883	Sutcliffiella horikoshii		14	0.01	14	130	116	S	79883	Sutcliffiella horikoshii
0	0	0	7	7	S	436516	Lysinibacillus parviboronicapiens		10	0	0	120	92	G1	2837532	unclassified Sutcliffiella		10	0	0	120	92	G1	2837532	unclassified Sutcliffiella
0	0	0	14	11	S	759811	Lysinibacillus pakistanensis		10	0	10	95	75	S	2921670	Sutcliffiella sp. FSL R7-0096		10	0	10	95	75	S	2921670	Sutcliffiella sp. FSL R7-0096
0	0	0	2	2	S	1145276	Lysinibacillus varians		0	0	0	25	17	S	3004096	Sutcliffiella sp. NC1		0	0	0	25	17	S	3004096	Sutcliffiella sp. NC1
0	0	0	12	12	S	2590012	Lysinibacillus agricola		1	0	1	11	8	S	33932	Sutcliffiella cohnii		1	0	1	11	8	S	33932	Sutcliffiella cohnii
20	0.02	6	326	251	G	2800373	Priestia		38	0.02	16	534	460	G	2837504	Heyndrickxia		38	0.02	16	534	460	G	2837504	Heyndrickxia
7	0.01	7	142	102	S	1404	Priestia megaterium		9	0	9	108	96	S	1476025	Heyndrickxia vini		9	0	9	108	96	S	1476025	Heyndrickxia vini
0	0	0	0	0	S1	545693	Priestia megaterium QM B1551		6	0	6	56	48	S	38875	Heyndrickxia oleronia		6	0	6	56	48	S	38875	Heyndrickxia oleronia
0	0	0	0	0	S1	592022	Priestia megaterium DSM 319		4	0	4	71	63	S	1398	Heyndrickxia coagulans		4	0	4	71	63	S	1398	Heyndrickxia coagulans
0	0	0	0	0	S1	1006007	Priestia megaterium WSH-002		0	0	0	3	3	S1	345219	Heyndrickxia coagulans 36D1		0	0	0	3	3	S1	345219	Heyndrickxia coagulans 36D1
0	0	0	4	3	S1	1138452	Priestia megaterium NCT-2		0	0	0	10	8	S1	941639	Heyndrickxia coagulans 2-6		0	0	0	10	8	S1	941639	Heyndrickxia coagulans 2-6
0	0	0	0	0	S1	1348623	Priestia megaterium NBRC 15308 = ATCC 14581		0	0	0	0	0	S1	1121088	Heyndrickxia coagulans DSM 1 = ATCC 7050		0	0	0	0	0	S1	1121088	Heyndrickxia coagulans DSM 1 = ATCC 7050
0	0	0	1	1	S1	1452722	Priestia megaterium Q3		3	0	0	39	33	G1	2837518	unclassified Heyndrickxia		3	0	0	39	33	G1	2837518	unclassified Heyndrickxia
3	0	3	35	30	S	86664	Priestia flexa		3	0	3	33	27	S	2921510	Heyndrickxia sp. FSL K6-6286		3	0	3	33	27	S	2921510	Heyndrickxia sp. FSL K6-6286
3	0	3	30	26	S	1402861	Priestia filamentosa		0	0	0	3	3	S	2954674	Weizmannia sp. FSL K6-0777		0	0	0	3	3	S	2954674	Weizmannia sp. FSL K6-0777
1	0	1	32	20	S	284581	Priestia koreensis		0	0	0	3	3	S	2954703	Weizmannia sp. FSL W8-0676		0	0	0	3	3	S	2954703	Weizmannia sp. FSL W8-0676
0	0	0	18	16	S	412384	Priestia aryabhattai		0	0	0	0	0	S	2984845	Weizmannia sp. WK01		0	0	0	0	0	S	2984845	Weizmannia sp. WK01
0	0	0	2	2	G1	2800374	unclassified Priestia		36	0.01	1	514	440	G	1221880	Psychrobacillus		36	0.01	1	514	440	G	1221880	Psychrobacillus
0	0	0	2	2	S	2886505	Priestia sp. J2		24	0.01	10	366	321	G1	2636677	unclassified Psychrobacillus		24	0.01	10	366	321	G1	2636677	unclassified Psychrobacillus
19	0.02	5	212	178	G	84406	Virgibacillus		7	0	7	83	72	S	2921389	Psychrobacillus sp. FSL H8-0483		7	0	7	83	72	S	2921389	Psychrobacillus sp. FSL H8-0483
6	0.01	0	67	47	G1	2620237	unclassified Virgibacillus		4	0	4	79	70	S	2829187	Psychrobacillus sp. INOP01		4	0	4	79	70	S	2829187	Psychrobacillus sp. INOP01
4	0	4	26	20	S	2700081	Virgibacillus sp. MSP4-1		2	0	2	32	29	S	2954547	Psychrobacillus sp. FSL W7-1457		2	0	2	32	29	S	2954547	Psychrobacillus sp. FSL W7-1457
1	0	1	4	4	S	403957	Virgibacillus sp. SK37		1	0	1	21	19	S	2921550	Psychrobacillus sp. FSL K6-4046		1	0	1	21	19	S	2921550	Psychrobacillus sp. FSL K6-4046
1	0	1	15	6	S	2419842	Virgibacillus sp. Bac332		0	0	0	7	7	S	2303505	Psychrobacillus sp. AK 1817		0	0	0	7	7	S	2303505	Psychrobacillus sp. AK 1817
0	0	0	0	0	S	1911587	Virgibacillus sp. 6R		0	0	0	15	14	S	2921549	Psychrobacillus sp. FSL K6-2843		0	0	0	15	14	S	2921549	Psychrobacillus sp. FSL K6-2843
0	0	0	12	7	S	2419841	Virgibacillus sp. Bac330		11	0	11	132	104	S	2283160	Psychrobacillus glaciei		11	0	11	132	104	S	2283160	Psychrobacillus glaciei
0	0	0	10	10	S	2831673	Virgibacillus sp. NKC19-16		35	0.01	2	587	493	G	2675231	Mesobacillus		35	0.01	2	587	493	G	2675231	Mesobacillus
4	0	4	24	22	S	1216297	Virgibacillus natechei		11	0	11	156	133	S	279826	Mesobacillus foraminis		11	0	11	156	133	S	279826	Mesobacillus foraminis
1	0	1	15	12	S	1482	Virgibacillus halodenitrificans		10	0	10	177	147	S	129985	Mesobacillus jeotgali		10	0	10	177	147	S	129985	Mesobacillus jeotgali
1	0	1	20	19	S	163877	Virgibacillus necropolis		10	0	0	139	110	G1	2675270	unclassified Mesobacillus		10	0	0	139	110	G1	2675270	unclassified Mesobacillus
1	0	1	7	7	S	302167	Virgibacillus dokdonensis		8	0	8	73	55	S	3043332	Mesobacillus sp. AQ2		8	0	8	73	55	S	3043332	Mesobacillus sp. AQ2
1	0	1	13	12	S	2017483	Virgibacillus phasianinus		2	0	2	66	55	S	2880221	Mesobacillus sp. S13		2	0	2	66	55	S	2880221	Mesobacillus sp. S13
0	0	0	0	0	S	1473	Virgibacillus pantothenticus		2	0	2	40	34	S	285983	Mesobacillus subterraneus		2	0	2	40	34	S	285983	Mesobacillus subterraneus
0	0	0	1	1	S	447199	Virgibacillus salarius		34	0.01	6	503	402	G	1329200	Fictibacillus		34	0.01	6	503	402	G	1329200	Fictibacillus
17	0.02	1	190	150	G	2837506	Niallia		8	0	8	135	109	S	1017270	Fictibacillus enclensis		8	0	8	135	109	S	1017270	Fictibacillus enclensis
6	0.01	6	40	38	S	1397	Niallia circulans		8	0	0	121	84	G1	2644029	unclassified Fictibacillus		8	0	0	121	84	G1	2644029	unclassified Fictibacillus
4	0	0	73	52	G1	2837522	unclassified Niallia		8	0	8	121	84	S	2991053	Fictibacillus sp. KU28468		8	0	8	121	84	S	2991053	Fictibacillus sp. KU28468
2	0	2	28	18	S	2912824	Niallia sp. Man26		6	0	6	86	80	S	255247	Fictibacillus arsenicus		6	0	6	86	80	S	255247	Fictibacillus arsenicus
1	0	1	13	11	S	2962858	Niallia sp. RD1		6	0	6	118	91	S	1221500	Fictibacillus phosphorivorans		6	0	6	118	91	S	1221500	Fictibacillus phosphorivorans
1	0	1	32	23	S	3082444	Niallia sp. XMNu-256		31	0.01	6	327	278	G	1906945	Parageobacillus		31	0.01	6	327	278	G	1906945	Parageobacillus
3	0	3	28	27	S	1737571	Niallia oryzisoli		10	0	6	96	79	S	1426	Parageobacillus thermoglucosidasius		10	0	6	96	79	S	1426	Parageobacillus thermoglucosidasius
3	0	3	35	21	S	2499688	Niallia taxi		3	0	3	10	9	S1	634956	Parageobacillus thermoglucosidasius C56-YS93		3	0	3	10	9	S1	634956	Parageobacillus thermoglucosidasius C56-YS93
16	0.02	7	233	166	G	2675230	Cytobacillus		1	0	1	9	3	S1	1136178	Parageobacillus thermoglucosidasius TNO-09.020		1	0	1	9	3	S1	1136178	Parageobacillus thermoglucosidasius TNO-09.020
2	0	2	45	29	S	1399	Cytobacillus firmus		9	0	9	72	56	S	81408	Parageobacillus caldoxylosilyticus		9	0	9	72	56	S	81408	Parageobacillus caldoxylosilyticus
2	0	1	17	12	S	665099	Cytobacillus oceanisediminis		3	0	3	31	29	S	1295642	Parageobacillus genomosp. 1		3	0	3	31	29	S	1295642	Parageobacillus genomosp. 1
1	0	1	3	3	S1	1196031	Cytobacillus oceanisediminis 2691		2	0	2	21	19	S	153151	Parageobacillus toebii		2	0	2	21	19	S	153151	Parageobacillus toebii
2	0	2	27	25	S	859144	Cytobacillus gottheilii		0	0	0	3	3	S1	1223503	Parageobacillus toebii NBRC 107807		0	0	0	3	3	S1	1223503	Parageobacillus toebii NBRC 107807
1	0	1	2	2	S	859143	Cytobacillus kochii		1	0	0	42	38	G1	2637039	unclassified Parageobacillus		1	0	0	42	38	G1	2637039	unclassified Parageobacillus
1	0	0	3	3	G1	2675268	unclassified Cytobacillus		1	0	1	42	38	S	2916802	Parageobacillus sp. KH3-4		1	0	1	42	38	S	2916802	Parageobacillus sp. KH3-4
1	0	1	3	3	S	2921700	Cytobacillus sp. FSL W7-1323		30	0.01	5	330	280	G	289201	Pontibacillus		30	0.01	5	330	280	G	289201	Pontibacillus
1	0	1	19	18	S	2901381	Cytobacillus spongiae		18	0.01	0	223	186	G1	2628296	unclassified Pontibacillus		18	0.01	0	223	186	G1	2628296	unclassified Pontibacillus
0	0	0	57	24	S	1637975	Cytobacillus solani		9	0	9	127	108	S	2692425	Pontibacillus sp. HMF3514		9	0	9	127	108	S	2692425	Pontibacillus sp. HMF3514
0	0	0	25	22	S	1742359	Cytobacillus dafuensis		9	0	9	95	77	S	2777185	Pontibacillus sp. ALD_SL1		9	0	9	95	77	S	2777185	Pontibacillus sp. ALD_SL1
0	0	0	1	1	S	3051614	Cytobacillus pseudoceanisediminis		7	0	7	58	51	S	265426	Pontibacillus chungwhensis		7	0	7	58	51	S	265426	Pontibacillus chungwhensis
15	0.02	1	150	122	G	45667	Halobacillus		28	0.01	10	383	317	G	2893057	Shouchella		28	0.01	10	383	317	G	2893057	Shouchella
4	0	4	19	12	S	2932258	Halobacillus shinanisalinarum		10	0	10	94	83	S	79880	Shouchella clausii		10	0	10	94	83	S	79880	Shouchella clausii
3	0	3	20	17	S	1570	Halobacillus halophilus		0	0	0	6	6	S1	66692	Shouchella clausii KSM-K16		0	0	0	6	6	S1	66692	Shouchella clausii KSM-K16
0	0	0	0	0	S1	866895	Halobacillus halophilus DSM 2266		4	0	4	30	21	S	766894	Shouchella hunanensis		4	0	4	30	21	S	766894	Shouchella hunanensis
2	0	2	22	20	S	402384	Halobacillus mangrovi		3	0	0	39	35	S	300825	Shouchella lehensis		3	0	0	39	35	S	300825	Shouchella lehensis
2	0	2	22	19	S	2932257	Halobacillus salinarum		3	0	3	39	35	S1	1246626	Shouchella lehensis G1		3	0	3	39	35	S1	1246626	Shouchella lehensis G1
1	0	1	24	19	S	45668	Halobacillus litoralis		1	0	1	18	14	S	2598861	Shouchella miscanthi		1	0	1	18	14	S	2598861	Shouchella miscanthi
1	0	1	19	15	S	554880	Halobacillus naozhouensis		0	0	0	2	2	S	866786	Shouchella rhizosphaerae		0	0	0	2	2	S	866786	Shouchella rhizosphaerae
1	0	1	8	7	S	2932259	Halobacillus amylolyticus		28	0.01	5	274	224	G	1434042	Salisediminibacterium		28	0.01	5	274	224	G	1434042	Salisediminibacterium
0	0	0	1	1	G1	2636472	unclassified Halobacillus		12	0	12	118	100	S	632773	Salisediminibacterium beveridgei		12	0	12	118	100	S	632773	Salisediminibacterium beveridgei
0	0	0	1	1	S	3052090	Halobacillus sp. ACCC02827		11	0	0	123	101	S	85683	Salisediminibacterium selenitireducens		11	0	0	123	101	S	85683	Salisediminibacterium selenitireducens
12	0.01	2	173	138	G	182709	Oceanobacillus		11	0	11	123	101	S1	439292	[Bacillus] selenitireducens MLS10		11	0	11	123	101	S1	439292	[Bacillus] selenitireducens MLS10
5	0.01	2	59	50	G1	2630292	unclassified Oceanobacillus		28	0.01	6	426	354	G	150247	Anoxybacillus		28	0.01	6	426	354	G	150247	Anoxybacillus
2	0	2	22	19	S	2921503	Oceanobacillus sp. FSL K6-3682		8	0	8	93	74	S	247480	Anoxybacillus caldiproteolyticus		8	0	8	93	74	S	247480	Anoxybacillus caldiproteolyticus
1	0	1	9	9	S	2954748	Oceanobacillus sp. FSL K6-2867		4	0	1	52	44	S	33934	Anoxybacillus flavithermus		4	0	1	52	44	S	33934	Anoxybacillus flavithermus
0	0	0	0	0	S	2921420	Oceanobacillus sp. FSL K6-0127		3	0	3	32	28	S1	491915	Anoxybacillus flavithermus WK1		3	0	3	32	28	S1	491915	Anoxybacillus flavithermus WK1
0	0	0	1	1	S	2921698	Oceanobacillus sp. FSL W7-1281		4	0	4	60	50	S	294699	Anoxybacillus amylolyticus		4	0	4	60	50	S	294699	Anoxybacillus amylolyticus
0	0	0	2	2	S	2921699	Oceanobacillus sp. FSL W7-1293		3	0	3	38	32	S	198467	Anoxybacillus gonensis		3	0	3	38	32	S	198467	Anoxybacillus gonensis
0	0	0	11	6	S	2975322	Oceanobacillus sp. FSL W7-1304		3	0	2	89	82	G1	2639704	unclassified Anoxybacillus		3	0	2	89	82	G1	2639704	unclassified Anoxybacillus
3	0	3	21	21	S	1462527	Oceanobacillus jeddahense		1	0	1	2	2	S	1490057	Anoxybacillus sp. B7M1		1	0	1	2	2	S	1490057	Anoxybacillus sp. B7M1
1	0	0	17	15	S	746691	Oceanobacillus kimchii		0	0	0	0	0	S	1490052	Anoxybacillus sp. B2M1		0	0	0	0	0	S	1490052	Anoxybacillus sp. B2M1
1	0	1	17	15	S1	1238184	Oceanobacillus kimchii X50		0	0	0	11	10	S	1636720	Anoxybacillus sp. PDR2		0	0	0	11	10	S	1636720	Anoxybacillus sp. PDR2
1	0	1	40	20	S	2052660	Oceanobacillus zhaokaii		0	0	0	13	13	S	2954655	Anoxybacillus sp. FSL W8-1294		0	0	0	13	13	S	2954655	Anoxybacillus sp. FSL W8-1294
0	0	0	5	5	S	182710	Oceanobacillus iheyensis		0	0	0	7	7	S	2613334	Anoxybacillus sediminis		0	0	0	7	7	S	2613334	Anoxybacillus sediminis
0	0	0	5	5	S1	221109	Oceanobacillus iheyensis HTE831		23	0.01	3	428	363	G	2685905	Salicibibacter		23	0.01	3	428	363	G	2685905	Salicibibacter
0	0	0	5	5	S	545501	Oceanobacillus oncorhynchi		6	0	6	76	63	S	2743001	Salicibibacter cibi		6	0	6	76	63	S	2743001	Salicibibacter cibi
12	0.01	3	180	140	G	2675233	Metabacillus		5	0	5	70	59	S	2502791	Salicibibacter halophilus		5	0	5	70	59	S	2502791	Salicibibacter halophilus
8	0.01	0	93	71	G1	2675274	unclassified Metabacillus		5	0	5	78	65	S	2743000	Salicibibacter cibarius		5	0	5	78	65	S	2743000	Salicibibacter cibarius
3	0	3	27	16	S	3117746	Metabacillus sp. FJAT-52054		4	0	4	73	66	S	2099786	Salicibibacter kimchii		4	0	4	73	66	S	2099786	Salicibibacter kimchii
2	0	2	16	15	S	2806989	Metabacillus sp. cB07		23	0.01	4	386	353	G	74385	Gracilibacillus		23	0.01	4	386	353	G	74385	Gracilibacillus
2	0	2	15	13	S	2897333	Metabacillus sp. B2-18		8	0	8	154	145	S	2663022	Gracilibacillus salitolerans		8	0	8	154	145	S	2663022	Gracilibacillus salitolerans
1	0	1	3	3	S	2745198	Metabacillus sp. KUDC1714		7	0	7	70	65	S	2932255	Gracilibacillus salinarum		7	0	7	70	65	S	2932255	Gracilibacillus salinarum
0	0	0	4	3	S	3048891	Metabacillus sp. CT-WN-B3		4	0	4	75	66	S	2932256	Gracilibacillus caseinilyticus		4	0	4	75	66	S	2932256	Gracilibacillus caseinilyticus
0	0	0	7	3	S	3117747	Metabacillus sp. FJAT-53654		21	0.01	1	308	259	G	175304	Lentibacillus		21	0.01	1	308	259	G	175304	Lentibacillus
1	0	1	17	17	S	2567941	Metabacillus sediminilitoris		7	0	0	84	77	G1	2614679	unclassified Lentibacillus		7	0	0	84	77	G1	2614679	unclassified Lentibacillus
0	0	0	6	6	S	152268	Metabacillus litoralis		7	0	7	84	77	S	2518176	Lentibacillus sp. CBA3610		7	0	7	84	77	S	2518176	Lentibacillus sp. CBA3610
0	0	0	9	8	S	1535204	Metabacillus endolithicus		7	0	7	98	87	S	2911514	Lentibacillus daqui		7	0	7	98	87	S	2911514	Lentibacillus daqui
0	0	0	5	4	S	2874282	Metabacillus dongyingensis		6	0	6	97	77	S	1472767	Lentibacillus amyloliquefaciens		6	0	6	97	77	S	1472767	Lentibacillus amyloliquefaciens
10	0.01	3	130	101	G	2837508	Rossellomorea		17	0.01	10	216	177	G	1055323	Aeribacillus		17	0.01	10	216	177	G	1055323	Aeribacillus
4	0	4	38	27	S	189381	Rossellomorea marisflavi		5	0	4	63	53	G1	2640495	unclassified Aeribacillus		5	0	4	63	53	G1	2640495	unclassified Aeribacillus
2	0	0	25	24	G1	2837526	unclassified Rossellomorea		1	0	1	7	7	S	2954608	Aeribacillus sp. FSL k6-2211		1	0	1	7	7	S	2954608	Aeribacillus sp. FSL k6-2211
1	0	1	5	5	S	2963940	Rossellomorea sp. KS-H15a		0	0	0	8	6	S	2954611	Aeribacillus sp. FSL K6-2833		0	0	0	8	6	S	2954611	Aeribacillus sp. FSL K6-2833
1	0	1	15	14	S	3118174	Rossellomorea sp. y25		0	0	0	4	4	S	2954613	Aeribacillus sp. FSL K6-3256		0	0	0	4	4	S	2954613	Aeribacillus sp. FSL K6-3256
0	0	0	4	4	S	3038653	Rossellomorea sp. DA94		0	0	0	4	4	S	2954683	Aeribacillus sp. FSL K6-8210		0	0	0	4	4	S	2954683	Aeribacillus sp. FSL K6-8210
1	0	1	15	14	S	218284	Rossellomorea vietnamensis		0	0	0	10	8	S	2954706	Aeribacillus sp. FSL W8-0870		0	0	0	10	8	S	2954706	Aeribacillus sp. FSL W8-0870
0	0	0	22	13	S	189382	Rossellomorea aquimaris		1	0	1	16	13	S	33936	Aeribacillus pallidus		1	0	1	16	13	S	33936	Aeribacillus pallidus
10	0.01	4	153	100	G	129337	Geobacillus		1	0	1	14	12	S	1868734	Aeribacillus composti		1	0	1	14	12	S	1868734	Aeribacillus composti
2	0	2	7	1	S	213419	Geobacillus zalihae		17	0.01	5	280	250	G	459532	Terribacillus		17	0.01	5	280	250	G	459532	Terribacillus
2	0	2	11	10	S	1921421	Geobacillus genomosp. 3		7	0	2	133	119	G1	2636508	unclassified Terribacillus		7	0	2	133	119	G1	2636508	unclassified Terribacillus
1	0	0	7	6	S	33940	Geobacillus thermodenitrificans		3	0	3	70	66	S	2921447	Terribacillus sp. FSL K6-0262		3	0	3	70	66	S	2921447	Terribacillus sp. FSL K6-0262
1	0	1	1	1	S1	420246	Geobacillus thermodenitrificans NG80-2		2	0	2	56	46	S	2850441	Terribacillus sp. DMT04		2	0	2	56	46	S	2850441	Terribacillus sp. DMT04
1	0	1	14	6	S	860353	Geobacillus proteiniphilus		3	0	3	18	16	S	361277	Terribacillus saccharophilus		3	0	3	18	16	S	361277	Terribacillus saccharophilus
0	0	0	1	1	S	1422	Geobacillus stearothermophilus		2	0	2	26	24	S	386490	Terribacillus goriensis		2	0	2	26	24	S	386490	Terribacillus goriensis
0	0	0	1	1	S1	1366047	Geobacillus stearothermophilus ATCC 12980		17	0.01	0	353	296	G	2675234	Alkalihalobacillus		17	0.01	0	353	296	G	2675234	Alkalihalobacillus
0	0	0	9	6	S	129338	Geobacillus subterraneus		17	0.01	0	353	296	G1	2675276	unclassified Alkalihalobacillus		17	0.01	0	353	296	G1	2675276	unclassified Alkalihalobacillus
0	0	0	7	7	G1	1505648	Geobacillus thermoleovorans group		8	0	8	142	116	S	2924032	Alkalihalobacillus sp. LMS39		8	0	8	142	116	S	2924032	Alkalihalobacillus sp. LMS39
0	0	0	0	0	S	1394	[Bacillus] caldolyticus		5	0	5	79	73	S	2924034	Alkalihalobacillus sp. LMS6		5	0	5	79	73	S	2924034	Alkalihalobacillus sp. LMS6
0	0	0	1	1	S	1462	Geobacillus kaustophilus		4	0	4	132	107	S	2926399	Alkalihalobacillus sp. AL-G		4	0	4	132	107	S	2926399	Alkalihalobacillus sp. AL-G
0	0	0	0	0	S1	235909	Geobacillus kaustophilus HTA426		17	0.01	4	296	230	G	3033930	Fervidibacillus		17	0.01	4	296	230	G	3033930	Fervidibacillus
0	0	0	1	1	S1	1220595	Geobacillus kaustophilus NBRC 102445		7	0	7	123	93	S	2980027	Fervidibacillus halotolerans		7	0	7	123	93	S	2980027	Fervidibacillus halotolerans
0	0	0	4	4	S	33938	Geobacillus thermocatenulatus		6	0	6	121	102	S	2980026	Fervidibacillus albus		6	0	6	121	102	S	2980026	Fervidibacillus albus
0	0	0	2	2	S	33941	Geobacillus thermoleovorans		16	0.01	0	212	174	G	2893058	Pseudalkalibacillus		16	0.01	0	212	174	G	2893058	Pseudalkalibacillus
0	0	0	0	0	S1	1111068	Geobacillus thermoleovorans CCB_US3_UF5		16	0.01	16	212	174	S	208199	Pseudalkalibacillus hwajinpoensis		16	0.01	16	212	174	S	208199	Pseudalkalibacillus hwajinpoensis
0	0	0	18	17	G1	2642459	unclassified Geobacillus		15	0.01	2	241	215	G	2837510	Siminovitchia		15	0.01	2	241	215	G	2837510	Siminovitchia
0	0	0	3	2	S	391290	Geobacillus sp. E263		11	0	9	145	128	G1	2837530	unclassified Siminovitchia		11	0	9	145	128	G1	2837530	unclassified Siminovitchia
0	0	0	2	2	S	550542	Geobacillus sp. Y412MC52		1	0	1	8	8	S	2921432	Siminovitchia sp. FSL H7-0308		1	0	1	8	8	S	2921432	Siminovitchia sp. FSL H7-0308
0	0	0	1	1	S	691437	Geobacillus sp. C56-T3		1	0	1	11	10	S	2954699	Siminovitchia sp. FSL W7-1587		1	0	1	11	10	S	2954699	Siminovitchia sp. FSL W7-1587
0	0	0	2	2	S	1233873	Geobacillus sp. GHH01		2	0	2	84	77	S	254758	Siminovitchia fortis		2	0	2	84	77	S	254758	Siminovitchia fortis
0	0	0	0	0	S	1813182	Geobacillus sp. JS12		15	0.01	0	190	165	G	2893060	Alkalihalophilus		15	0.01	0	190	165	G	2893060	Alkalihalophilus
0	0	0	6	6	S	1963025	Geobacillus sp. 46C-IIa		15	0.01	12	190	165	S	79885	Alkalihalophilus pseudofirmus		15	0.01	12	190	165	S	79885	Alkalihalophilus pseudofirmus
0	0	0	1	1	S	1963026	Geobacillus sp. 47C-IIb		3	0	3	24	23	S1	398511	Alkalihalophilus pseudofirmus OF4		3	0	3	24	23	S1	398511	Alkalihalophilus pseudofirmus OF4
0	0	0	0	0	S	2921730	Geobacillus sp. FSL W8-0032		14	0.01	0	169	149	G	1494427	Tepidibacillus		14	0.01	0	169	149	G	1494427	Tepidibacillus
0	0	0	0	0	S	2954597	Geobacillus sp. FSL W8-0026		14	0.01	0	169	149	G1	2619009	unclassified Tepidibacillus		14	0.01	0	169	149	G1	2619009	unclassified Tepidibacillus
0	0	0	0	0	S	2954614	Geobacillus sp. FSL K6-3411		14	0.01	14	169	149	S	3131995	Tepidibacillus sp. LSZ-M11000		14	0.01	14	169	149	S	3131995	Tepidibacillus sp. LSZ-M11000
0	0	0	0	0	S	2954744	Geobacillus sp. FSL K6-0789		14	0.01	0	285	256	G	2837485	Evansella		14	0.01	0	285	256	G	2837485	Evansella
0	0	0	1	1	S	2975350	Geobacillus sp. FSL W8-0466		8	0	0	151	133	S	1413	Evansella cellulosilytica		8	0	0	151	133	S	1413	Evansella cellulosilytica
8	0.01	3	207	185	G	2675229	Peribacillus		8	0	8	151	133	S1	649639	Evansella cellulosilytica DSM 2522		8	0	8	151	133	S1	649639	Evansella cellulosilytica DSM 2522
4	0	0	36	26	G1	2675266	unclassified Peribacillus		6	0	0	133	122	G1	2837486	unclassified Evansella		6	0	0	133	122	G1	2837486	unclassified Evansella
3	0	3	19	12	S	2921364	Peribacillus sp. FSL E2-0218		6	0	6	133	122	S	2924033	Evansella sp. LMS18		6	0	6	133	122	S	2924033	Evansella sp. LMS18
1	0	1	8	6	S	3073271	Peribacillus sp. R9-11		14	0.01	0	229	171	G	379065	Caldalkalibacillus		14	0.01	0	229	171	G	379065	Caldalkalibacillus
0	0	0	3	3	S	2921573	Peribacillus sp. FSL P2-0133		14	0.01	0	229	171	S	296745	Caldalkalibacillus thermarum		14	0.01	0	229	171	S	296745	Caldalkalibacillus thermarum
0	0	0	6	5	S	2975289	Peribacillus sp. FSL E2-0159		14	0.01	14	229	171	S1	986075	Caldalkalibacillus thermarum TA2.A1		14	0.01	14	229	171	S1	986075	Caldalkalibacillus thermarum TA2.A1
1	0	1	14	14	S	1407	Peribacillus psychrosaccharolyticus		13	0.01	0	166	146	G	704093	Anaerobacillus		13	0.01	0	166	146	G	704093	Anaerobacillus
0	0	0	33	31	S	1478	Peribacillus simplex		13	0.01	13	166	146	S	1532552	Anaerobacillus isosaccharinicus		13	0.01	13	166	146	S	1532552	Anaerobacillus isosaccharinicus
0	0	0	1	1	S1	1349754	Peribacillus simplex NBRC 15720 = DSM 1321		12	0	0	145	126	G	2893055	Halalkalibacterium (ex Joshi et al. 2022)		12	0	0	145	126	G	2893055	Halalkalibacterium (ex Joshi et al. 2022)
0	0	0	39	37	S	228899	Peribacillus asahii		12	0	11	145	126	S	86665	Halalkalibacterium halodurans		12	0	11	145	126	S	86665	Halalkalibacterium halodurans
0	0	0	5	5	S	264697	Peribacillus muralis		1	0	1	11	11	S1	272558	Halalkalibacterium halodurans C-125		1	0	1	11	11	S1	272558	Halalkalibacterium halodurans C-125
0	0	0	2	2	S	421767	Peribacillus butanolivorans		12	0	0	126	101	G	2804231	Lederbergia		12	0	0	126	101	G	2804231	Lederbergia
0	0	0	42	34	S	450367	Peribacillus frigoritolerans		12	0	12	126	101	S	1467	Lederbergia lenta		12	0	12	126	101	S	1467	Lederbergia lenta
8	0.01	0	77	59	G	1329200	Fictibacillus		11	0	0	101	88	G	482460	Sediminibacillus		11	0	0	101	88	G	482460	Sediminibacillus
5	0.01	0	20	16	G1	2644029	unclassified Fictibacillus		11	0	11	101	88	S	2729421	Sediminibacillus dalangtanensis		11	0	11	101	88	S	2729421	Sediminibacillus dalangtanensis
5	0.01	5	20	16	S	2991053	Fictibacillus sp. KU28468		10	0	0	82	65	G	3034001	Caldifermentibacillus		10	0	0	82	65	G	3034001	Caldifermentibacillus
2	0	2	35	21	S	1017270	Fictibacillus enclensis		10	0	10	82	65	S	996558	Caldifermentibacillus hisashii		10	0	10	82	65	S	996558	Caldifermentibacillus hisashii
1	0	1	9	9	S	1221500	Fictibacillus phosphorivorans		10	0	0	204	172	G	2785518	Radiobacillus		10	0	0	204	172	G	2785518	Radiobacillus
0	0	0	5	5	S	255247	Fictibacillus arsenicus		7	0	7	103	85	S	2844358	Radiobacillus kanasensis		7	0	7	103	85	S	2844358	Radiobacillus kanasensis
7	0.01	0	25	14	G	3034001	Caldifermentibacillus		3	0	3	69	63	S	2594883	Radiobacillus deserti		3	0	3	69	63	S	2594883	Radiobacillus deserti
7	0.01	7	25	14	S	996558	Caldifermentibacillus hisashii		10	0	0	179	146	G	2837503	Gottfriedia		10	0	0	179	146	G	2837503	Gottfriedia
7	0.01	2	114	79	G	2675231	Mesobacillus		10	0	10	179	146	S	371036	Gottfriedia acidiceleris		10	0	10	179	146	S	371036	Gottfriedia acidiceleris
2	0	2	7	7	S	285983	Mesobacillus subterraneus		9	0	0	144	114	G	1400133	Allobacillus		9	0	0	144	114	G	1400133	Allobacillus
2	0	0	24	18	G1	2675270	unclassified Mesobacillus		9	0	9	144	114	S	570278	Allobacillus halotolerans		9	0	9	144	114	S	570278	Allobacillus halotolerans
1	0	1	17	13	S	2880221	Mesobacillus sp. S13		9	0	2	156	128	G	351195	Salimicrobium		9	0	2	156	128	G	351195	Salimicrobium
1	0	1	7	5	S	3043332	Mesobacillus sp. AQ2		5	0	0	62	55	G1	2619739	unclassified Salimicrobium		5	0	0	62	55	G1	2619739	unclassified Salimicrobium
1	0	1	31	16	S	129985	Mesobacillus jeotgali		5	0	5	62	55	S	3095364	Salimicrobium sp. PL1-032A		5	0	5	62	55	S	3095364	Salimicrobium sp. PL1-032A
0	0	0	26	22	S	279826	Mesobacillus foraminis		2	0	2	81	61	S	1230341	Salimicrobium jeotgali		2	0	2	81	61	S	1230341	Salimicrobium jeotgali
5	0.01	2	88	80	G	2837504	Heyndrickxia		8	0	0	99	89	G	29331	Amphibacillus		8	0	0	99	89	G	29331	Amphibacillus
1	0	1	11	10	S	1398	Heyndrickxia coagulans		8	0	0	99	89	S	1449	Amphibacillus xylanus		8	0	0	99	89	S	1449	Amphibacillus xylanus
0	0	0	0	0	S1	345219	Heyndrickxia coagulans 36D1		8	0	8	99	89	S1	698758	Amphibacillus xylanus NBRC 15112		8	0	8	99	89	S1	698758	Amphibacillus xylanus NBRC 15112
0	0	0	0	0	S1	941639	Heyndrickxia coagulans 2-6		7	0	0	140	121	G	1433999	Domibacillus		7	0	0	140	121	G	1433999	Domibacillus
0	0	0	0	0	S1	1121088	Heyndrickxia coagulans DSM 1 = ATCC 7050		7	0	0	140	121	G1	2632383	unclassified Domibacillus		7	0	0	140	121	G1	2632383	unclassified Domibacillus
1	0	1	22	20	S	1476025	Heyndrickxia vini		7	0	7	140	121	S	3077789	Domibacillus sp. DTU_2020_1001157_1_SI_ALB_TIR_016		7	0	7	140	121	S	3077789	Domibacillus sp. DTU_2020_1001157_1_SI_ALB_TIR_016
1	0	0	4	2	G1	2837518	unclassified Heyndrickxia		7	0	0	101	93	G	484508	Ornithinibacillus		7	0	0	101	93	G	484508	Ornithinibacillus
1	0	1	4	2	S	2921510	Heyndrickxia sp. FSL K6-6286		7	0	0	101	93	G1	2620869	unclassified Ornithinibacillus		7	0	0	101	93	G1	2620869	unclassified Ornithinibacillus
0	0	0	0	0	S	2954674	Weizmannia sp. FSL K6-0777		7	0	7	101	93	S	2921616	Ornithinibacillus sp. FSL M8-0202		7	0	7	101	93	S	2921616	Ornithinibacillus sp. FSL M8-0202
0	0	0	0	0	S	2954703	Weizmannia sp. FSL W8-0676		6	0	0	96	87	G	2920444	Mangrovibacillus		6	0	0	96	87	G	2920444	Mangrovibacillus
0	0	0	0	0	S	2984845	Weizmannia sp. WK01		6	0	6	96	87	S	2593652	Mangrovibacillus cuniculi		6	0	6	96	87	S	2593652	Mangrovibacillus cuniculi
0	0	0	9	9	S	38875	Heyndrickxia oleronia		6	0	0	114	100	G	2944627	Paenalkalicoccus		6	0	0	114	100	G	2944627	Paenalkalicoccus
5	0.01	0	57	50	G	1906945	Parageobacillus		6	0	6	114	100	S	2592382	Paenalkalicoccus suaedae		6	0	6	114	100	S	2592382	Paenalkalicoccus suaedae
2	0	2	10	10	S	81408	Parageobacillus caldoxylosilyticus		5	0	0	79	70	G	2837502	Ectobacillus		5	0	0	79	70	G	2837502	Ectobacillus
2	0	2	11	5	S	1295642	Parageobacillus genomosp. 1		5	0	0	79	70	G1	2837512	unclassified Ectobacillus		5	0	0	79	70	G1	2837512	unclassified Ectobacillus
1	0	1	19	18	S	1426	Parageobacillus thermoglucosidasius		5	0	5	79	70	S	2933872	Ectobacillus sp. JY-23		5	0	5	79	70	S	2933872	Ectobacillus sp. JY-23
0	0	0	4	4	S1	634956	Parageobacillus thermoglucosidasius C56-YS93		5	0	0	116	106	G	1884449	Salipaludibacillus		5	0	0	116	106	G	1884449	Salipaludibacillus
0	0	0	1	1	S1	1136178	Parageobacillus thermoglucosidasius TNO-09.020		5	0	0	116	106	G1	2635229	unclassified Salipaludibacillus		5	0	0	116	106	G1	2635229	unclassified Salipaludibacillus
0	0	0	0	0	S	153151	Parageobacillus toebii		5	0	5	116	106	S	2924031	Salipaludibacillus sp. LMS25		5	0	5	116	106	S	2924031	Salipaludibacillus sp. LMS25
0	0	0	0	0	S1	1223503	Parageobacillus toebii NBRC 107807		5	0	0	134	112	G	2893056	Halalkalibacter		5	0	0	134	112	G	2893056	Halalkalibacter
0	0	0	8	8	G1	2637039	unclassified Parageobacillus		5	0	5	134	112	S	199441	Halalkalibacter krulwichiae		5	0	5	134	112	S	199441	Halalkalibacter krulwichiae
0	0	0	8	8	S	2916802	Parageobacillus sp. KH3-4		4	0	0	110	96	G	200903	Paraliobacillus		4	0	0	110	96	G	200903	Paraliobacillus
5	0.01	0	84	68	G	74385	Gracilibacillus		4	0	4	110	96	S	2213194	Paraliobacillus zengyii		4	0	4	110	96	S	2213194	Paraliobacillus zengyii
2	0	2	36	27	S	2663022	Gracilibacillus salitolerans		3	0	0	108	90	G	3158337	Aciduricibacillus		3	0	0	108	90	G	3158337	Aciduricibacillus
2	0	2	22	18	S	2932255	Gracilibacillus salinarum		3	0	3	108	90	S	3054939	Aciduricibacillus chroicocephali		3	0	3	108	90	S	3054939	Aciduricibacillus chroicocephali
1	0	1	12	11	S	2932256	Gracilibacillus caseinilyticus		3	0	0	116	103	G	2651279	Pradoshia		3	0	0	116	103	G	2651279	Pradoshia
4	0	0	119	88	G	1221880	Psychrobacillus		3	0	0	116	103	G1	2651280	unclassified Pradoshia		3	0	0	116	103	G1	2651280	unclassified Pradoshia
4	0	1	80	68	G1	2636677	unclassified Psychrobacillus		3	0	3	116	103	S	2651284	Pradoshia sp. D12		3	0	3	116	103	S	2651284	Pradoshia sp. D12
2	0	2	16	13	S	2829187	Psychrobacillus sp. INOP01		3	0	0	119	98	G	2005375	Alkalicoccus		3	0	0	119	98	G	2005375	Alkalicoccus
1	0	1	24	15	S	2921389	Psychrobacillus sp. FSL H8-0483		3	0	3	119	98	S	1667239	Alkalicoccus halolimnae		3	0	3	119	98	S	1667239	Alkalicoccus halolimnae
0	0	0	3	3	S	2303505	Psychrobacillus sp. AK 1817		2	0	0	18	16	G	1276290	Caldibacillus		2	0	0	18	16	G	1276290	Caldibacillus
0	0	0	5	5	S	2921549	Psychrobacillus sp. FSL K6-2843		2	0	2	18	16	S	35841	Caldibacillus thermoamylovorans		2	0	2	18	16	S	35841	Caldibacillus thermoamylovorans
0	0	0	5	5	S	2921550	Psychrobacillus sp. FSL K6-4046		1743	0.71	37	24301	20701	F	186822	Paenibacillaceae		1743	0.71	37	24301	20701	F	186822	Paenibacillaceae
0	0	0	6	6	S	2954547	Psychrobacillus sp. FSL W7-1457		1446	0.59	315	19282	16482	G	44249	Paenibacillus		1446	0.59	315	19282	16482	G	44249	Paenibacillus
0	0	0	38	19	S	2283160	Psychrobacillus glaciei		569	0.23	90	7155	6096	G1	185978	unclassified Paenibacillus		569	0.23	90	7155	6096	G1	185978	unclassified Paenibacillus
4	0	0	59	54	G	2675234	Alkalihalobacillus		27	0.01	27	253	213	S	1306526	Paenibacillus sp. HWE-109		27	0.01	27	253	213	S	1306526	Paenibacillus sp. HWE-109
4	0	0	59	54	G1	2675276	unclassified Alkalihalobacillus		20	0.01	20	147	125	S	2996034	Paenibacillus sp. SYP-B4298		20	0.01	20	147	125	S	2996034	Paenibacillus sp. SYP-B4298
2	0	2	28	23	S	2924032	Alkalihalobacillus sp. LMS39		14	0.01	14	191	154	S	3039392	Paenibacillus sp. RC67		14	0.01	14	191	154	S	3039392	Paenibacillus sp. RC67
2	0	2	19	19	S	2926399	Alkalihalobacillus sp. AL-G		14	0.01	14	167	142	S	2908839	Paenibacillus sp. YPD9-1		14	0.01	14	167	142	S	2908839	Paenibacillus sp. YPD9-1
0	0	0	12	12	S	2924034	Alkalihalobacillus sp. LMS6		14	0.01	14	166	143	S	2282849	Paenibacillus sp. H1-7		14	0.01	14	166	143	S	2282849	Paenibacillus sp. H1-7
4	0	0	98	76	G	150247	Anoxybacillus		13	0.01	13	118	102	S	2758563	Paenibacillus sp. 19GGS1-52		13	0.01	13	118	102	S	2758563	Paenibacillus sp. 19GGS1-52
1	0	1	11	11	S	198467	Anoxybacillus gonensis		13	0.01	13	134	105	S	2859228	Paenibacillus sp. R14(2021)		13	0.01	13	134	105	S	2859228	Paenibacillus sp. R14(2021)
1	0	1	19	12	S	247480	Anoxybacillus caldiproteolyticus		13	0.01	13	92	84	S	2921714	Paenibacillus sp. FSL W8-0426		13	0.01	13	92	84	S	2921714	Paenibacillus sp. FSL W8-0426
1	0	1	23	13	S	294699	Anoxybacillus amylolyticus		13	0.01	13	188	157	S	2921495	Paenibacillus sp. FSL K6-3182		13	0.01	13	188	157	S	2921495	Paenibacillus sp. FSL K6-3182
1	0	0	12	12	G1	2639704	unclassified Anoxybacillus		12	0	12	90	82	S	2895946	Paenibacillus sp. MMS20-IR301		12	0	12	90	82	S	2895946	Paenibacillus sp. MMS20-IR301
1	0	1	3	3	S	1636720	Anoxybacillus sp. PDR2		12	0	12	136	123	S	1566358	Paenibacillus sp. IHBB 10380		12	0	12	136	123	S	1566358	Paenibacillus sp. IHBB 10380
0	0	0	0	0	S	1490052	Anoxybacillus sp. B2M1		12	0	12	152	123	S	2835869	Paenibacillus sp. 481		12	0	12	152	123	S	2835869	Paenibacillus sp. 481
0	0	0	0	0	S	1490057	Anoxybacillus sp. B7M1		12	0	12	161	142	S	324057	Paenibacillus sp. JDR-2		12	0	12	161	142	S	324057	Paenibacillus sp. JDR-2
0	0	0	2	2	S	2954655	Anoxybacillus sp. FSL W8-1294		11	0	11	121	97	S	1870819	Paenibacillus sp. BIHB 4019		11	0	11	121	97	S	1870819	Paenibacillus sp. BIHB 4019
0	0	0	12	11	S	33934	Anoxybacillus flavithermus		11	0	11	153	125	S	1920422	Paenibacillus sp. FSL H8-0548		11	0	11	153	125	S	1920422	Paenibacillus sp. FSL H8-0548
0	0	0	8	7	S1	491915	Anoxybacillus flavithermus WK1		11	0	11	96	77	S	2878915	Paenibacillus sp. YPG26		11	0	11	96	77	S	2878915	Paenibacillus sp. YPG26
0	0	0	3	2	S	2613334	Anoxybacillus sediminis		11	0	11	109	93	S	2023772	Paenibacillus sp. RUD330		11	0	11	109	93	S	2023772	Paenibacillus sp. RUD330
3	0	1	58	44	G	175304	Lentibacillus		9	0	9	141	120	S	1695218	Paenibacillus sp. 32O-W		9	0	9	141	120	S	1695218	Paenibacillus sp. 32O-W
1	0	0	21	14	G1	2614679	unclassified Lentibacillus		8	0	8	50	44	S	1536771	Paenibacillus sp. FSL R5-0912		8	0	8	50	44	S	1536771	Paenibacillus sp. FSL R5-0912
1	0	1	21	14	S	2518176	Lentibacillus sp. CBA3610		8	0	8	119	100	S	2918901	Paenibacillus sp. MBLB1832		8	0	8	119	100	S	2918901	Paenibacillus sp. MBLB1832
1	0	1	22	20	S	2911514	Lentibacillus daqui		8	0	8	102	92	S	2921711	Paenibacillus sp. FSL W8-0194		8	0	8	102	92	S	2921711	Paenibacillus sp. FSL W8-0194
0	0	0	13	8	S	1472767	Lentibacillus amyloliquefaciens		8	0	8	119	110	S	1532905	Paenibacillus sp. CAA11		8	0	8	119	110	S	1532905	Paenibacillus sp. CAA11
3	0	0	48	34	G	2785518	Radiobacillus		7	0	7	55	42	S	2777983	Paenibacillus sp. JNUCC-31		7	0	7	55	42	S	2777983	Paenibacillus sp. JNUCC-31
2	0	2	28	20	S	2844358	Radiobacillus kanasensis		7	0	7	83	76	S	2072642	Paenibacillus sp. PK3_47		7	0	7	83	76	S	2072642	Paenibacillus sp. PK3_47
1	0	1	13	10	S	2594883	Radiobacillus deserti		7	0	7	51	42	S	2979727	Paenibacillus sp. KS-LC4		7	0	7	51	42	S	2979727	Paenibacillus sp. KS-LC4
3	0	1	53	48	G	2685905	Salicibibacter		6	0	6	81	69	S	3073092	Paenibacillus sp. D2_2		6	0	6	81	69	S	3073092	Paenibacillus sp. D2_2
1	0	1	12	11	S	2099786	Salicibibacter kimchii		6	0	6	77	63	S	2921687	Paenibacillus sp. FSL R7-0652		6	0	6	77	63	S	2921687	Paenibacillus sp. FSL R7-0652
1	0	1	13	9	S	2502791	Salicibibacter halophilus		6	0	6	71	62	S	2921399	Paenibacillus sp. FSL H8-0537		6	0	6	71	62	S	2921399	Paenibacillus sp. FSL H8-0537
0	0	0	12	12	S	2743000	Salicibibacter cibarius		5	0	5	23	17	S	2975291	Paenibacillus sp. FSL K6-1318		5	0	5	23	17	S	2975291	Paenibacillus sp. FSL K6-1318
0	0	0	6	6	S	2743001	Salicibibacter cibi		5	0	5	53	44	S	2921450	Paenibacillus sp. FSL K6-0276		5	0	5	53	44	S	2921450	Paenibacillus sp. FSL K6-0276
3	0	0	65	39	G	1434042	Salisediminibacterium		5	0	5	14	11	S	2921386	Paenibacillus sp. FSL H8-0457		5	0	5	14	11	S	2921386	Paenibacillus sp. FSL H8-0457
2	0	2	46	23	S	632773	Salisediminibacterium beveridgei		5	0	5	86	70	S	2762320	Paenibacillus sp. PAMC21692		5	0	5	86	70	S	2762320	Paenibacillus sp. PAMC21692
1	0	0	17	14	S	85683	Salisediminibacterium selenitireducens		5	0	5	60	56	S	2921679	Paenibacillus sp. FSL R7-0272		5	0	5	60	56	S	2921679	Paenibacillus sp. FSL R7-0272
1	0	1	17	14	S1	439292	[Bacillus] selenitireducens MLS10		5	0	5	27	25	S	2954506	Paenibacillus sp. FSL H3-0469		5	0	5	27	25	S	2954506	Paenibacillus sp. FSL H3-0469
3	0	1	31	25	G	1055323	Aeribacillus		5	0	5	55	33	S	2211212	Paenibacillus sp. DCT19		5	0	5	55	33	S	2211212	Paenibacillus sp. DCT19
1	0	1	6	1	S	1868734	Aeribacillus composti		5	0	5	45	41	S	2925845	Paenibacillus sp. N3/727		5	0	5	45	41	S	2925845	Paenibacillus sp. N3/727
1	0	0	6	6	G1	2640495	unclassified Aeribacillus		5	0	5	75	53	S	2741301	Paenibacillus sp. URB8-2		5	0	5	75	53	S	2741301	Paenibacillus sp. URB8-2
1	0	1	1	1	S	2954608	Aeribacillus sp. FSL k6-2211		4	0	4	53	50	S	2954679	Paenibacillus sp. FSL K6-2441		4	0	4	53	50	S	2954679	Paenibacillus sp. FSL K6-2441
0	0	0	0	0	S	2954611	Aeribacillus sp. FSL K6-2833		4	0	4	20	15	S	2975317	Paenibacillus sp. FSL P2-0136		4	0	4	20	15	S	2975317	Paenibacillus sp. FSL P2-0136
0	0	0	0	0	S	2954613	Aeribacillus sp. FSL K6-3256		4	0	4	133	121	S	715179	Paenibacillus sp. sptzw28		4	0	4	133	121	S	715179	Paenibacillus sp. sptzw28
0	0	0	2	2	S	2954683	Aeribacillus sp. FSL K6-8210		4	0	4	57	54	S	2954691	Paenibacillus sp. FSL R10-2734		4	0	4	57	54	S	2954691	Paenibacillus sp. FSL R10-2734
0	0	0	0	0	S	2954706	Aeribacillus sp. FSL W8-0870		4	0	4	27	20	S	2921361	Paenibacillus sp. FSL E2-0178		4	0	4	27	20	S	2921361	Paenibacillus sp. FSL E2-0178
0	0	0	2	2	S	33936	Aeribacillus pallidus		3	0	3	60	60	S	1536773	Paenibacillus sp. FSL R7-0331		3	0	3	60	60	S	1536773	Paenibacillus sp. FSL R7-0331
3	0	0	37	31	G	2804231	Lederbergia		3	0	3	33	30	S	2954685	Paenibacillus sp. FSL L8-0340		3	0	3	33	30	S	2954685	Paenibacillus sp. FSL L8-0340
3	0	3	37	31	S	1467	Lederbergia lenta		3	0	3	30	25	S	2954686	Paenibacillus sp. FSL L8-0436		3	0	3	30	25	S	2954686	Paenibacillus sp. FSL L8-0436
3	0	0	47	40	G	2837485	Evansella		3	0	3	39	32	S	2954661	Paenibacillus sp. FSL R10-2782		3	0	3	39	32	S	2954661	Paenibacillus sp. FSL R10-2782
2	0	0	24	20	S	1413	Evansella cellulosilytica		3	0	3	44	37	S	1536772	Paenibacillus sp. FSL R7-0273		3	0	3	44	37	S	1536772	Paenibacillus sp. FSL R7-0273
2	0	2	24	20	S1	649639	Evansella cellulosilytica DSM 2522		3	0	3	28	24	S	2954742	Paenibacillus sp. FSL H8-0332		3	0	3	28	24	S	2954742	Paenibacillus sp. FSL H8-0332
1	0	0	22	19	G1	2837486	unclassified Evansella		3	0	3	9	9	S	2921357	Paenibacillus sp. FSL E2-0151		3	0	3	9	9	S	2921357	Paenibacillus sp. FSL E2-0151
1	0	1	22	19	S	2924033	Evansella sp. LMS18		3	0	3	46	44	S	2921709	Paenibacillus sp. FSL W8-0186		3	0	3	46	44	S	2921709	Paenibacillus sp. FSL W8-0186
3	0	0	59	54	G	289201	Pontibacillus		3	0	3	30	27	S	3078263	Paenibacillus sp. BIC5C1		3	0	3	30	27	S	3078263	Paenibacillus sp. BIC5C1
3	0	0	38	34	G1	2628296	unclassified Pontibacillus		3	0	3	24	21	S	3047872	Paenibacillus sp. G2S3		3	0	3	24	21	S	3047872	Paenibacillus sp. G2S3
2	0	2	22	20	S	2692425	Pontibacillus sp. HMF3514		3	0	3	73	52	S	2954535	Paenibacillus sp. FSL R7-0345		3	0	3	73	52	S	2954535	Paenibacillus sp. FSL R7-0345
1	0	1	16	14	S	2777185	Pontibacillus sp. ALD_SL1		3	0	3	14	13	S	2975339	Paenibacillus sp. FSL W8-1187		3	0	3	14	13	S	2975339	Paenibacillus sp. FSL W8-1187
0	0	0	13	13	S	265426	Pontibacillus chungwhensis		3	0	3	20	20	S	2975345	Paenibacillus sp. FSL H7-0350		3	0	3	20	20	S	2975345	Paenibacillus sp. FSL H7-0350
2	0	0	81	66	G	2837511	Sutcliffiella		3	0	3	32	22	S	2660554	Paenibacillus sp. B01		3	0	3	32	22	S	2660554	Paenibacillus sp. B01
2	0	2	25	21	S	79883	Sutcliffiella horikoshii		2	0	2	6	5	S	2921656	Paenibacillus sp. FSL R5-0744		2	0	2	6	5	S	2921656	Paenibacillus sp. FSL R5-0744
0	0	0	0	0	S	33932	Sutcliffiella cohnii		2	0	2	9	9	S	2921641	Paenibacillus sp. FSL R5-0470		2	0	2	9	9	S	2921641	Paenibacillus sp. FSL R5-0470
0	0	0	22	17	G1	2837532	unclassified Sutcliffiella		2	0	2	80	74	S	2921677	Paenibacillus sp. FSL R7-0216		2	0	2	80	74	S	2921677	Paenibacillus sp. FSL R7-0216
0	0	0	15	13	S	2921670	Sutcliffiella sp. FSL R7-0096		2	0	2	24	22	S	2921375	Paenibacillus sp. FSL H8-0079		2	0	2	24	22	S	2921375	Paenibacillus sp. FSL H8-0079
0	0	0	7	4	S	3004096	Sutcliffiella sp. NC1		2	0	2	30	27	S	2921370	Paenibacillus sp. FSL F4-0100		2	0	2	30	27	S	2921370	Paenibacillus sp. FSL F4-0100
2	0	1	65	47	G	2893057	Shouchella		2	0	2	8	7	S	481743	Paenibacillus sp. Y412MC10		2	0	2	8	7	S	481743	Paenibacillus sp. Y412MC10
1	0	1	7	6	S	766894	Shouchella hunanensis		2	0	2	28	20	S	1536769	Paenibacillus sp. FSL P4-0081		2	0	2	28	20	S	1536769	Paenibacillus sp. FSL P4-0081
0	0	0	7	7	S	79880	Shouchella clausii		2	0	2	22	13	S	1536770	Paenibacillus sp. FSL R5-0345		2	0	2	22	13	S	1536770	Paenibacillus sp. FSL R5-0345
0	0	0	0	0	S1	66692	Shouchella clausii KSM-K16		2	0	2	46	34	S	1536774	Paenibacillus sp. FSL H7-0357		2	0	2	46	34	S	1536774	Paenibacillus sp. FSL H7-0357
0	0	0	8	8	S	300825	Shouchella lehensis		2	0	2	23	22	S	3024576	Paenibacillus sp. PK4536		2	0	2	23	22	S	3024576	Paenibacillus sp. PK4536
0	0	0	8	8	S1	1246626	Shouchella lehensis G1		2	0	2	14	13	S	3032287	Paenibacillus sp. BR1-192		2	0	2	14	13	S	3032287	Paenibacillus sp. BR1-192
0	0	0	0	0	S	866786	Shouchella rhizosphaerae		1	0	1	18	13	S	3122489	Paenibacillus sp. Y5S-9		1	0	1	18	13	S	3122489	Paenibacillus sp. Y5S-9
0	0	0	7	3	S	2598861	Shouchella miscanthi		1	0	1	10	10	S	2954663	Paenibacillus sp. FSL R10-2796		1	0	1	10	10	S	2954663	Paenibacillus sp. FSL R10-2796
2	0	0	34	27	G	2893060	Alkalihalophilus		1	0	1	19	12	S	2921695	Paenibacillus sp. FSL W7-1088		1	0	1	19	12	S	2921695	Paenibacillus sp. FSL W7-1088
2	0	2	34	27	S	79885	Alkalihalophilus pseudofirmus		1	0	1	6	6	S	3049075	Paenibacillus sp. PK1-4R		1	0	1	6	6	S	3049075	Paenibacillus sp. PK1-4R
0	0	0	3	3	S1	398511	Alkalihalophilus pseudofirmus OF4		1	0	1	3	3	S	3045840	Paenibacillus sp. RC334		1	0	1	3	3	S	3045840	Paenibacillus sp. RC334
2	0	0	48	37	G	3033930	Fervidibacillus		1	0	1	7	7	S	2954505	Paenibacillus sp. FSL E2-0202		1	0	1	7	7	S	2954505	Paenibacillus sp. FSL E2-0202
2	0	2	28	21	S	2980026	Fervidibacillus albus		1	0	1	11	11	S	3025665	Paenibacillus sp. KACC 21273		1	0	1	11	11	S	3025665	Paenibacillus sp. KACC 21273
0	0	0	19	15	S	2980027	Fervidibacillus halotolerans		1	0	1	48	38	S	2954525	Paenibacillus sp. FSL M8-0142		1	0	1	48	38	S	2954525	Paenibacillus sp. FSL M8-0142
2	0	0	30	28	G	379065	Caldalkalibacillus		1	0	1	19	19	S	2954526	Paenibacillus sp. FSL P2-0089		1	0	1	19	19	S	2954526	Paenibacillus sp. FSL P2-0089
2	0	0	30	28	S	296745	Caldalkalibacillus thermarum		1	0	1	9	8	S	2954752	Paenibacillus sp. FSL L8-0158		1	0	1	9	8	S	2954752	Paenibacillus sp. FSL L8-0158
2	0	2	30	28	S1	986075	Caldalkalibacillus thermarum TA2.A1		1	0	1	17	14	S	2954618	Paenibacillus sp. FSL L8-0435		1	0	1	17	14	S	2954618	Paenibacillus sp. FSL L8-0435
2	0	1	79	48	G	459532	Terribacillus		1	0	1	2	2	S	2954653	Paenibacillus sp. FSL W8-1287		1	0	1	2	2	S	2954653	Paenibacillus sp. FSL W8-1287
1	0	1	51	22	G1	2636508	unclassified Terribacillus		1	0	1	9	9	S	2954732	Paenibacillus sp. FSL F4-0243		1	0	1	9	9	S	2954732	Paenibacillus sp. FSL F4-0243
0	0	0	36	8	S	2850441	Terribacillus sp. DMT04		1	0	1	14	11	S	2954659	Paenibacillus sp. FSL R10-2778		1	0	1	14	11	S	2954659	Paenibacillus sp. FSL R10-2778
0	0	0	13	12	S	2921447	Terribacillus sp. FSL K6-0262		1	0	1	25	20	S	867076	Paenibacillus sp. IHB B 3084		1	0	1	25	20	S	867076	Paenibacillus sp. IHB B 3084
0	0	0	3	3	S	361277	Terribacillus saccharophilus		1	0	1	4	4	S	2921360	Paenibacillus sp. FSL E2-0177		1	0	1	4	4	S	2921360	Paenibacillus sp. FSL E2-0177
0	0	0	7	7	S	386490	Terribacillus goriensis		1	0	1	15	10	S	2871175	Paenibacillus sp. DR312		1	0	1	15	10	S	2871175	Paenibacillus sp. DR312
1	0	0	45	34	G	2893058	Pseudalkalibacillus		1	0	1	43	25	S	2866810	Paenibacillus sp. PSB04		1	0	1	43	25	S	2866810	Paenibacillus sp. PSB04
1	0	1	45	34	S	208199	Pseudalkalibacillus hwajinpoensis		1	0	1	12	11	S	2921430	Paenibacillus sp. FSL H3-0457		1	0	1	12	11	S	2921430	Paenibacillus sp. FSL H3-0457
1	0	0	24	21	G	2893056	Halalkalibacter		1	0	1	7	4	S	2823905	Paenibacillus sp. S25		1	0	1	7	4	S	2823905	Paenibacillus sp. S25
1	0	1	24	21	S	199441	Halalkalibacter krulwichiae		1	0	1	60	49	S	2921460	Paenibacillus sp. FSL K6-1096		1	0	1	60	49	S	2921460	Paenibacillus sp. FSL K6-1096
1	0	0	24	23	G	2893055	Halalkalibacterium (ex Joshi et al. 2022)		1	0	1	7	7	S	2777984	Paenibacillus sp. JNUCC32		1	0	1	7	7	S	2777984	Paenibacillus sp. JNUCC32
1	0	1	24	23	S	86665	Halalkalibacterium halodurans		1	0	1	11	10	S	2921610	Paenibacillus sp. FSL M7-0896		1	0	1	11	10	S	2921610	Paenibacillus sp. FSL M7-0896
0	0	0	0	0	S1	272558	Halalkalibacterium halodurans C-125		1	0	1	11	11	S	2921626	Paenibacillus sp. FSL P2-0121		1	0	1	11	11	S	2921626	Paenibacillus sp. FSL P2-0121
1	0	0	24	19	G	351195	Salimicrobium		1	0	1	6	6	S	2921628	Paenibacillus sp. FSL P2-0322		1	0	1	6	6	S	2921628	Paenibacillus sp. FSL P2-0322
1	0	1	15	12	S	1230341	Salimicrobium jeotgali		1	0	1	10	10	S	2921631	Paenibacillus sp. FSL P4-0176		1	0	1	10	10	S	2921631	Paenibacillus sp. FSL P4-0176
0	0	0	9	7	G1	2619739	unclassified Salimicrobium		1	0	1	9	7	S	2487928	Paenibacillus sp. M-152		1	0	1	9	7	S	2487928	Paenibacillus sp. M-152
0	0	0	9	7	S	3095364	Salimicrobium sp. PL1-032A		1	0	1	9	7	S	2069255	Paenibacillus sp. lzh-N1		1	0	1	9	7	S	2069255	Paenibacillus sp. lzh-N1
1	0	0	39	30	G	2837510	Siminovitchia		1	0	1	17	17	S	1926588	Paenibacillus sp. FSL R7-0337		1	0	1	17	17	S	1926588	Paenibacillus sp. FSL R7-0337
1	0	1	9	9	S	254758	Siminovitchia fortis		1	0	1	14	13	S	2921647	Paenibacillus sp. FSL R5-0517		1	0	1	14	13	S	2921647	Paenibacillus sp. FSL R5-0517
0	0	0	29	20	G1	2837530	unclassified Siminovitchia		1	0	1	11	11	S	1980674	Paenibacillus sp. Cedars		1	0	1	11	11	S	1980674	Paenibacillus sp. Cedars
0	0	0	1	1	S	2921432	Siminovitchia sp. FSL H7-0308		1	0	1	21	20	S	2921648	Paenibacillus sp. FSL R5-0519		1	0	1	21	20	S	2921648	Paenibacillus sp. FSL R5-0519
0	0	0	3	3	S	2954699	Siminovitchia sp. FSL W7-1587		1	0	1	9	7	S	2921657	Paenibacillus sp. FSL R5-0749		1	0	1	9	7	S	2921657	Paenibacillus sp. FSL R5-0749
1	0	0	17	17	G	482460	Sediminibacillus		1	0	1	6	6	S	1906272	Paenibacillus sp. JZ16		1	0	1	6	6	S	1906272	Paenibacillus sp. JZ16
1	0	1	17	17	S	2729421	Sediminibacillus dalangtanensis		1	0	1	8	7	S	2921655	Paenibacillus sp. FSL R5-0713		1	0	1	8	7	S	2921655	Paenibacillus sp. FSL R5-0713
1	0	0	26	25	G	2837503	Gottfriedia		1	0	1	3	3	S	1740264	Paenibacillus sp. LX16		1	0	1	3	3	S	1740264	Paenibacillus sp. LX16
1	0	1	26	25	S	371036	Gottfriedia acidiceleris		1	0	1	8	7	S	2921654	Paenibacillus sp. FSL R5-0701		1	0	1	8	7	S	2921654	Paenibacillus sp. FSL R5-0701
1	0	0	14	14	G	2651279	Pradoshia		0	0	0	2	2	S	2954734	Paenibacillus sp. FSL H3-0329		0	0	0	2	2	S	2954734	Paenibacillus sp. FSL H3-0329
1	0	0	14	14	G1	2651280	unclassified Pradoshia		0	0	0	3	3	S	2954739	Paenibacillus sp. FSL H7-0943		0	0	0	3	3	S	2954739	Paenibacillus sp. FSL H7-0943
1	0	1	14	14	S	2651284	Pradoshia sp. D12		0	0	0	3	3	S	2954741	Paenibacillus sp. FSL H8-0282		0	0	0	3	3	S	2954741	Paenibacillus sp. FSL H8-0282
1	0	0	30	21	G	484508	Ornithinibacillus		0	0	0	0	0	S	2921428	Paenibacillus sp. FSL H3-0302		0	0	0	0	0	S	2921428	Paenibacillus sp. FSL H3-0302
1	0	0	30	21	G1	2620869	unclassified Ornithinibacillus		0	0	0	7	4	S	1536775	Paenibacillus sp. FSL H7-0737		0	0	0	7	4	S	1536775	Paenibacillus sp. FSL H7-0737
1	0	1	30	21	S	2921616	Ornithinibacillus sp. FSL M8-0202		0	0	0	10	8	S	2975292	Paenibacillus sp. FSL K6-1330		0	0	0	10	8	S	2975292	Paenibacillus sp. FSL K6-1330
1	0	0	60	28	G	704093	Anaerobacillus		0	0	0	1	1	S	2975331	Paenibacillus sp. FSL L8-0333		0	0	0	1	1	S	2975331	Paenibacillus sp. FSL L8-0333
1	0	1	60	28	S	1532552	Anaerobacillus isosaccharinicus		0	0	0	4	4	S	2823904	Paenibacillus sp. S02		0	0	0	4	4	S	2823904	Paenibacillus sp. S02
1	0	0	23	21	G	1433999	Domibacillus		0	0	0	17	17	S	1920423	Paenibacillus sp. FSL H8-0259		0	0	0	17	17	S	1920423	Paenibacillus sp. FSL H8-0259
1	0	0	23	21	G1	2632383	unclassified Domibacillus		0	0	0	0	0	S	3045841	Paenibacillus sp. RC343		0	0	0	0	0	S	3045841	Paenibacillus sp. RC343
1	0	1	23	21	S	3077789	Domibacillus sp. DTU_2020_1001157_1_SI_ALB_TIR_016		0	0	0	9	9	S	2976834	Paenibacillus sp. FSL k6-2145		0	0	0	9	9	S	2976834	Paenibacillus sp. FSL k6-2145
1	0	0	36	18	G	1494427	Tepidibacillus		0	0	0	10	6	S	2748863	Paenibacillus sp. E222		0	0	0	10	6	S	2748863	Paenibacillus sp. E222
1	0	0	36	18	G1	2619009	unclassified Tepidibacillus		0	0	0	6	6	S	1920424	Paenibacillus sp. FSL R5-0490		0	0	0	6	6	S	1920424	Paenibacillus sp. FSL R5-0490
1	0	1	36	18	S	3131995	Tepidibacillus sp. LSZ-M11000		0	0	0	12	10	S	2607911	Paenibacillus sp. 37		0	0	0	12	10	S	2607911	Paenibacillus sp. 37
0	0	0	24	22	G	2944627	Paenalkalicoccus		0	0	0	2	2	S	2954530	Paenibacillus sp. FSL R7-0163		0	0	0	2	2	S	2954530	Paenibacillus sp. FSL R7-0163
0	0	0	24	22	S	2592382	Paenalkalicoccus suaedae		0	0	0	9	8	S	2921673	Paenibacillus sp. FSL R7-0189		0	0	0	9	8	S	2921673	Paenibacillus sp. FSL R7-0189
0	0	0	28	22	G	2920444	Mangrovibacillus		0	0	0	14	12	S	2921658	Paenibacillus sp. FSL R5-0766		0	0	0	14	12	S	2921658	Paenibacillus sp. FSL R5-0766
0	0	0	28	22	S	2593652	Mangrovibacillus cuniculi		0	0	0	15	12	S	2921697	Paenibacillus sp. FSL W7-1279		0	0	0	15	12	S	2921697	Paenibacillus sp. FSL W7-1279
0	0	0	30	11	G	3158337	Aciduricibacillus		0	0	0	19	14	S	2921702	Paenibacillus sp. FSL W7-1332		0	0	0	19	14	S	2921702	Paenibacillus sp. FSL W7-1332
0	0	0	30	11	S	3054939	Aciduricibacillus chroicocephali		0	0	0	7	7	S	2921652	Paenibacillus sp. FSL R5-0636		0	0	0	7	7	S	2921652	Paenibacillus sp. FSL R5-0636
0	0	0	12	10	G	2837502	Ectobacillus		0	0	0	12	12	S	2921710	Paenibacillus sp. FSL W8-0187		0	0	0	12	12	S	2921710	Paenibacillus sp. FSL W8-0187
0	0	0	12	10	G1	2837512	unclassified Ectobacillus		0	0	0	13	13	S	2921651	Paenibacillus sp. FSL R5-0623		0	0	0	13	13	S	2921651	Paenibacillus sp. FSL R5-0623
0	0	0	12	10	S	2933872	Ectobacillus sp. JY-23		0	0	0	12	12	S	2926710	Paenibacillus sp. CC-CFT742		0	0	0	12	12	S	2926710	Paenibacillus sp. CC-CFT742
0	0	0	16	16	G	2005375	Alkalicoccus		0	0	0	7	6	S	2954504	Paenibacillus sp. FSL E2-0190		0	0	0	7	6	S	2954504	Paenibacillus sp. FSL E2-0190
0	0	0	16	16	S	1667239	Alkalicoccus halolimnae		0	0	0	7	7	S	2921645	Paenibacillus sp. FSL R5-0486		0	0	0	7	7	S	2921645	Paenibacillus sp. FSL R5-0486
0	0	0	16	15	G	1884449	Salipaludibacillus		0	0	0	12	12	S	2921636	Paenibacillus sp. FSL R5-0341		0	0	0	12	12	S	2921636	Paenibacillus sp. FSL R5-0341
0	0	0	16	15	G1	2635229	unclassified Salipaludibacillus		0	0	0	7	7	S	2954512	Paenibacillus sp. FSL K6-1122		0	0	0	7	7	S	2954512	Paenibacillus sp. FSL K6-1122
0	0	0	16	15	S	2924031	Salipaludibacillus sp. LMS25		0	0	0	6	6	S	2921369	Paenibacillus sp. FSL F4-0097		0	0	0	6	6	S	2921369	Paenibacillus sp. FSL F4-0097
0	0	0	9	9	G	1400133	Allobacillus		0	0	0	8	8	S	2954532	Paenibacillus sp. FSL R7-0313		0	0	0	8	8	S	2954532	Paenibacillus sp. FSL R7-0313
0	0	0	9	9	S	570278	Allobacillus halotolerans		0	0	0	2	2	S	2954619	Paenibacillus sp. FSL L8-0502		0	0	0	2	2	S	2954619	Paenibacillus sp. FSL L8-0502
0	0	0	2	2	G	1276290	Caldibacillus		0	0	0	12	10	S	2921604	Paenibacillus sp. FSL L8-0638		0	0	0	12	10	S	2921604	Paenibacillus sp. FSL L8-0638
0	0	0	2	2	S	35841	Caldibacillus thermoamylovorans		0	0	0	6	5	S	2921443	Paenibacillus sp. FSL H7-0940		0	0	0	6	5	S	2921443	Paenibacillus sp. FSL H7-0940
0	0	0	15	14	G	200903	Paraliobacillus		0	0	0	5	5	S	2921437	Paenibacillus sp. FSL H7-0690		0	0	0	5	5	S	2921437	Paenibacillus sp. FSL H7-0690
0	0	0	15	14	S	2213194	Paraliobacillus zengyii		0	0	0	2	2	S	2921435	Paenibacillus sp. FSL H7-0442		0	0	0	2	2	S	2921435	Paenibacillus sp. FSL H7-0442
0	0	0	17	17	G	29331	Amphibacillus		0	0	0	6	4	S	2921667	Paenibacillus sp. FSL R5-0928		0	0	0	6	4	S	2921667	Paenibacillus sp. FSL R5-0928
0	0	0	17	17	S	1449	Amphibacillus xylanus		0	0	0	6	6	S	2921378	Paenibacillus sp. FSL H8-0168		0	0	0	6	6	S	2921378	Paenibacillus sp. FSL H8-0168
0	0	0	17	17	S1	698758	Amphibacillus xylanus NBRC 15112		0	0	0	8	7	S	2954726	Paenibacillus sp. FSL E2-0201		0	0	0	8	7	S	2954726	Paenibacillus sp. FSL E2-0201
291	0.32	3	4730	3715	F	186822	Paenibacillaceae		0	0	0	2	2	S	2954727	Paenibacillus sp. FSL E2-0230		0	0	0	2	2	S	2954727	Paenibacillus sp. FSL E2-0230
247	0.27	54	3855	3030	G	44249	Paenibacillus		0	0	0	4	4	S	2954728	Paenibacillus sp. FSL E2-0274		0	0	0	4	4	S	2954728	Paenibacillus sp. FSL E2-0274
100	0.11	20	1490	1136	G1	185978	unclassified Paenibacillus		38	0.02	38	239	191	S	2909671	Paenibacillus spongiae		38	0.02	38	239	191	S	2909671	Paenibacillus spongiae
6	0.01	6	36	31	S	2282849	Paenibacillus sp. H1-7		31	0.01	21	299	257	S	1406	Paenibacillus polymyxa		31	0.01	21	299	257	S	1406	Paenibacillus polymyxa
5	0.01	5	34	29	S	1920422	Paenibacillus sp. FSL H8-0548		9	0	9	27	11	S1	349520	Paenibacillus polymyxa E681		9	0	9	27	11	S1	349520	Paenibacillus polymyxa E681
5	0.01	5	26	23	S	3039392	Paenibacillus sp. RC67		1	0	1	8	6	S1	1429244	Paenibacillus polymyxa CR1		1	0	1	8	6	S1	1429244	Paenibacillus polymyxa CR1
3	0	3	24	20	S	2918901	Paenibacillus sp. MBLB1832		0	0	0	0	0	S1	886882	Paenibacillus polymyxa SC2		0	0	0	0	0	S1	886882	Paenibacillus polymyxa SC2
3	0	3	8	8	S	3078263	Paenibacillus sp. BIC5C1		0	0	0	0	0	S1	1036171	Paenibacillus polymyxa ATCC 842		0	0	0	0	0	S1	1036171	Paenibacillus polymyxa ATCC 842
3	0	3	31	24	S	2758563	Paenibacillus sp. 19GGS1-52		0	0	0	5	5	S1	1052684	Paenibacillus polymyxa M1		0	0	0	5	5	S1	1052684	Paenibacillus polymyxa M1
3	0	3	26	24	S	1532905	Paenibacillus sp. CAA11		0	0	0	4	3	S1	1413214	Paenibacillus polymyxa SQR-21		0	0	0	4	3	S1	1413214	Paenibacillus polymyxa SQR-21
3	0	3	18	17	S	2023772	Paenibacillus sp. RUD330		29	0.01	29	315	266	S	1778678	Paenibacillus psychroresistens		29	0.01	29	315	266	S	1778678	Paenibacillus psychroresistens
3	0	3	45	25	S	324057	Paenibacillus sp. JDR-2		21	0.01	21	231	188	S	1712516	Paenibacillus baekrokdamisoli		21	0.01	21	231	188	S	1712516	Paenibacillus baekrokdamisoli
2	0	2	12	9	S	2921361	Paenibacillus sp. FSL E2-0178		18	0.01	17	214	180	S	61624	Paenibacillus mucilaginosus		18	0.01	17	214	180	S	61624	Paenibacillus mucilaginosus
2	0	2	13	13	S	2762320	Paenibacillus sp. PAMC21692		1	0	1	12	11	S1	997761	Paenibacillus mucilaginosus K02		1	0	1	12	11	S1	997761	Paenibacillus mucilaginosus K02
2	0	2	8	8	S	2926710	Paenibacillus sp. CC-CFT742		0	0	0	0	0	S1	1036673	Paenibacillus mucilaginosus KNP414		0	0	0	0	0	S1	1036673	Paenibacillus mucilaginosus KNP414
2	0	2	30	20	S	2835869	Paenibacillus sp. 481		0	0	0	0	0	S1	1116391	Paenibacillus mucilaginosus 3016		0	0	0	0	0	S1	1116391	Paenibacillus mucilaginosus 3016
2	0	2	16	14	S	1870819	Paenibacillus sp. BIHB 4019		15	0.01	15	161	146	S	189691	Paenibacillus elgii		15	0.01	15	161	146	S	189691	Paenibacillus elgii
2	0	2	19	16	S	2859228	Paenibacillus sp. R14(2021)		15	0.01	15	134	113	S	116718	Paenibacillus azoreducens		15	0.01	15	134	113	S	116718	Paenibacillus azoreducens
2	0	2	24	22	S	1566358	Paenibacillus sp. IHBB 10380		15	0.01	15	167	148	S	1473112	Paenibacillus guangzhouensis		15	0.01	15	167	148	S	1473112	Paenibacillus guangzhouensis
2	0	2	29	16	S	2878915	Paenibacillus sp. YPG26		14	0.01	14	124	102	S	44252	Paenibacillus macerans		14	0.01	14	124	102	S	44252	Paenibacillus macerans
2	0	2	11	7	S	2921709	Paenibacillus sp. FSL W8-0186		13	0.01	8	109	96	S	44251	Paenibacillus durus		13	0.01	8	109	96	S	44251	Paenibacillus durus
2	0	2	11	9	S	2921687	Paenibacillus sp. FSL R7-0652		5	0	5	44	43	S1	1333534	Paenibacillus durus ATCC 35681		5	0	5	44	43	S1	1333534	Paenibacillus durus ATCC 35681
2	0	2	20	17	S	3073092	Paenibacillus sp. D2_2		13	0.01	13	171	141	S	1178515	Paenibacillus swuensis		13	0.01	13	171	141	S	1178515	Paenibacillus swuensis
2	0	2	40	30	S	1306526	Paenibacillus sp. HWE-109		12	0	12	165	134	S	2918900	Paenibacillus aurantius		12	0	12	165	134	S	2918900	Paenibacillus aurantius
1	0	1	3	3	S	2954526	Paenibacillus sp. FSL P2-0089		12	0	12	155	132	S	375489	Paenibacillus cellulosilyticus		12	0	12	155	132	S	375489	Paenibacillus cellulosilyticus
1	0	1	25	20	S	2895946	Paenibacillus sp. MMS20-IR301		12	0	12	128	116	S	521520	Paenibacillus urinalis		12	0	12	128	116	S	521520	Paenibacillus urinalis
1	0	1	9	9	S	2954525	Paenibacillus sp. FSL M8-0142		12	0	12	170	138	S	2495582	Paenibacillus albus		12	0	12	170	138	S	2495582	Paenibacillus albus
1	0	1	60	30	S	2908839	Paenibacillus sp. YPD9-1		12	0	9	155	121	S	1464	Paenibacillus larvae		12	0	9	155	121	S	1464	Paenibacillus larvae
1	0	1	24	17	S	2921495	Paenibacillus sp. FSL K6-3182		2	0	2	8	8	S1	147375	Paenibacillus larvae subsp. larvae		2	0	2	8	8	S1	147375	Paenibacillus larvae subsp. larvae
1	0	1	5	5	S	2777983	Paenibacillus sp. JNUCC-31		0	0	0	1	1	S2	697284	Paenibacillus larvae subsp. larvae DSM 25430		0	0	0	1	1	S2	697284	Paenibacillus larvae subsp. larvae DSM 25430
1	0	1	2	2	S	2954504	Paenibacillus sp. FSL E2-0190		1	0	1	8	8	S1	1477	Paenibacillus larvae subsp. pulvifaciens		1	0	1	8	8	S1	1477	Paenibacillus larvae subsp. pulvifaciens
1	0	1	9	2	S	2748863	Paenibacillus sp. E222		11	0	11	126	99	S	1616788	Paenibacillus bovis		11	0	11	126	99	S	1616788	Paenibacillus bovis
1	0	1	3	3	S	2921648	Paenibacillus sp. FSL R5-0519		11	0	11	153	136	S	2020716	Paenibacillus konkukensis		11	0	11	153	136	S	2020716	Paenibacillus konkukensis
1	0	1	4	4	S	2921378	Paenibacillus sp. FSL H8-0168		11	0	11	204	189	S	162209	Paenibacillus naphthalenovorans		11	0	11	204	189	S	162209	Paenibacillus naphthalenovorans
1	0	1	14	12	S	715179	Paenibacillus sp. sptzw28		10	0	10	102	92	S	2704462	Paenibacillus lycopersici		10	0	10	102	92	S	2704462	Paenibacillus lycopersici
1	0	1	18	13	S	2921677	Paenibacillus sp. FSL R7-0216		10	0	10	133	109	S	3110539	Paenibacillus silvisoli		10	0	10	133	109	S	3110539	Paenibacillus silvisoli
1	0	1	12	10	S	1536773	Paenibacillus sp. FSL R7-0331		9	0	9	139	122	S	44250	Paenibacillus alvei		9	0	9	139	122	S	44250	Paenibacillus alvei
1	0	1	2	2	S	2954661	Paenibacillus sp. FSL R10-2782		9	0	9	107	92	S	171404	Paenibacillus agaridevorans		9	0	9	107	92	S	171404	Paenibacillus agaridevorans
1	0	1	13	13	S	2921711	Paenibacillus sp. FSL W8-0194		8	0	8	105	100	S	169760	Paenibacillus stellifer		8	0	8	105	100	S	169760	Paenibacillus stellifer
1	0	1	3	3	S	2921658	Paenibacillus sp. FSL R5-0766		8	0	8	45	33	S	562959	Paenibacillus cellulositrophicus		8	0	8	45	33	S	562959	Paenibacillus cellulositrophicus
1	0	1	9	9	S	2921714	Paenibacillus sp. FSL W8-0426		8	0	8	112	97	S	539262	Paenibacillus hunanensis		8	0	8	112	97	S	539262	Paenibacillus hunanensis
1	0	1	31	23	S	2996034	Paenibacillus sp. SYP-B4298		8	0	8	188	166	S	2975482	Paenibacillus andongensis		8	0	8	188	166	S	2975482	Paenibacillus andongensis
1	0	1	6	6	S	1980674	Paenibacillus sp. Cedars		8	0	8	104	89	S	2565926	Paenibacillus algicola		8	0	8	104	89	S	2565926	Paenibacillus algicola
1	0	1	10	9	S	2072642	Paenibacillus sp. PK3_47		8	0	8	110	102	S	1763538	Paenibacillus crassostreae		8	0	8	110	102	S	1763538	Paenibacillus crassostreae
1	0	1	10	9	S	2211212	Paenibacillus sp. DCT19		7	0	7	154	123	S	2704463	Paenibacillus rhizovicinus		7	0	7	154	123	S	2704463	Paenibacillus rhizovicinus
1	0	1	10	6	S	2660554	Paenibacillus sp. B01		7	0	7	125	113	S	414771	Paenibacillus donghaensis		7	0	7	125	113	S	414771	Paenibacillus donghaensis
0	0	0	3	3	S	2954659	Paenibacillus sp. FSL R10-2778		7	0	7	114	97	S	1338368	Paenibacillus lentus		7	0	7	114	97	S	1338368	Paenibacillus lentus
0	0	0	11	8	S	2954506	Paenibacillus sp. FSL H3-0469		7	0	7	162	143	S	79263	Paenibacillus chitinolyticus		7	0	7	162	143	S	79263	Paenibacillus chitinolyticus
0	0	0	0	0	S	2954619	Paenibacillus sp. FSL L8-0502		7	0	7	107	94	S	3050112	Paenibacillus polygoni		7	0	7	107	94	S	3050112	Paenibacillus polygoni
0	0	0	0	0	S	2954653	Paenibacillus sp. FSL W8-1287		6	0	6	113	101	S	2509456	Paenibacillus protaetiae		6	0	6	113	101	S	2509456	Paenibacillus protaetiae
0	0	0	3	1	S	2954618	Paenibacillus sp. FSL L8-0435		6	0	6	50	46	S	1451	Paenibacillus amylolyticus		6	0	6	50	46	S	1451	Paenibacillus amylolyticus
0	0	0	1	1	S	2954663	Paenibacillus sp. FSL R10-2796		6	0	6	148	134	S	130049	Paenibacillus dendritiformis		6	0	6	148	134	S	130049	Paenibacillus dendritiformis
0	0	0	14	13	S	2954535	Paenibacillus sp. FSL R7-0345		6	0	6	55	50	S	1472	Paenibacillus pabuli		6	0	6	55	50	S	1472	Paenibacillus pabuli
0	0	0	3	3	S	2954532	Paenibacillus sp. FSL R7-0313		6	0	0	90	83	G1	2044880	Paenibacillus sonchi group		6	0	0	90	83	G1	2044880	Paenibacillus sonchi group
0	0	0	2	2	S	2954530	Paenibacillus sp. FSL R7-0163		5	0	0	39	34	S	483937	Paenibacillus riograndensis		5	0	0	39	34	S	483937	Paenibacillus riograndensis
0	0	0	2	2	S	2954512	Paenibacillus sp. FSL K6-1122		5	0	5	39	34	S1	1073571	Paenibacillus riograndensis SBR5		5	0	5	39	34	S1	1073571	Paenibacillus riograndensis SBR5
0	0	0	2	2	S	2921702	Paenibacillus sp. FSL W7-1332		1	0	1	35	33	S	373687	Paenibacillus sonchi		1	0	1	35	33	S	373687	Paenibacillus sonchi
0	0	0	1	1	S	2954505	Paenibacillus sp. FSL E2-0202		6	0	6	58	54	S	198119	Paenibacillus barcinonensis		6	0	6	58	54	S	198119	Paenibacillus barcinonensis
0	0	0	7	7	S	2925845	Paenibacillus sp. N3/727		5	0	5	166	134	S	1126833	Paenibacillus beijingensis		5	0	5	166	134	S	1126833	Paenibacillus beijingensis
0	0	0	4	3	S	2921710	Paenibacillus sp. FSL W8-0187		5	0	0	70	58	S	365617	Paenibacillus sabinae		5	0	0	70	58	S	365617	Paenibacillus sabinae
[truncated: 19,130 more rows]

## Sheet: Supplementary Table 2
Supplementary Table 2. Isotope-labeling experiments on natural samples
Culture ID	Incubation Condition	Incubation time (hrs.)	13C label1	15N-NH4Cl (50 µM)	18O –H2O (10%)
Sed 1	Aerobic	-	-	-	-
Sed 2	Aerobic	4	Bicarb (0.5 µM)	+	+
Sed 3	Aerobic	4	BPA (0.5 µM)	+	-
Sed 4	Aerobic	4	Algal AA (0.005%)	+	-
Sed 5	Aerobic	4	Starch (0.005%)	+	-
Sed 6	Aerobic	24	Bicarb (0.5 µM)	+	+
Sed 7	Aerobic	24	BPA (0.5 µM)	+	-
Sed 8	Aerobic	24	Algal AA (0.005%)	+	-
Sed 9	Aerobic	24	Starch (0.005%)	+	-
Sed 10	Anaerobic	-	-	-	-
Sed 11	Anaerobic	4	Bicarb (0.5 µM)	+	+
Sed 12	Anaerobic	4	BPA (0.5 µM)	+	-
Sed 13	Anaerobic	4	Algal AA (0.005%)	+	-
Sed 14	Anaerobic	4	Starch (0.005%)	+	-
Sed 15	Anaerobic	24	Bicarb (0.5 µM)	+	+
Sed 16	Anaerobic	24	BPA (0.5 µM)	+	-
Sed 17	Anaerobic	24	Algal AA (0.005%)	+	-
Sed 18	Anaerobic	24	Starch (0.005%)	+	-
1Abbreviations: Bicarb, Bicarbonate; BPA, Butyrate Propionate & Acetate; AA, Amino Acids

## Sheet: Supplementary Table 3
Supplementary Table 3. Statistical analysis of FISH-NanoSIMS data from GBS sediments and lab cultures
Supplementary Figure 2									Figure 2
Types	Substrate	Condition	Time	Comparison	Statistical Test	p value			Types	Substrate	Condition	Time	Comparison	Statistical Test	p value
13C	bicarbonate	aerobic	4 hour	Calditenuis vs control	Mann Whitney U test	0.0817712			13C	amino acids	aerobic	24 hour	Calditenuis vs control	Mann Whitney U test	0.000999001
13C	BPA	aerobic	4 hour	Calditenuis vs control	Mann Whitney U test	0.662338			13C	formate	aerobic	24 hour	Calditenuis vs control	Mann Whitney U test	0.0365223
13C	algal AA	aerobic	4 hour	Calditenuis vs control	Mann Whitney U test	0.678655			13C	acetate	aerobic	24 hour	Calditenuis vs control	Mann Whitney U test	0.004329
13C	starch	aerobic	4 hour	Calditenuis vs control	Mann Whitney U test	0.392857			13C	propionate	aerobic	24 hour	Calditenuis vs control	Mann Whitney U test	3.03948e-06
13C	bicarbonate	aerobic	4 hour	Other cells vs control	Mann Whitney U test	0.00606061			13C	bicarbonate	aerobic	24 hour	Calditenuis vs control	Mann Whitney U test	0.00498796
13C	BPA	aerobic	4 hour	Other cells vs control	Mann Whitney U test	0.303696			13C	glucose	aerobic	24 hour	Calditenuis vs control	Mann Whitney U test	7.59474e-05
13C	algal AA	aerobic	4 hour	Other cells vs control	Mann Whitney U test	0.394285			13C	xylose	aerobic	24 hour	Calditenuis vs control	Mann Whitney U test	0.003996
13C	starch	aerobic	4 hour	Other cells vs control	Mann Whitney U test	0.114286			13C	ribose	aerobic	24 hour	Calditenuis vs control	Mann Whitney U test	0.000666001
13C	bicarbonate	aerobic	4 hour	Calditenuis vs other cells	Mann Whitney U test	0.142216			13C	butyrate	aerobic	24 hour	Calditenuis vs control	Mann Whitney U test	2.035e-05
13C	BPA	aerobic	4 hour	Calditenuis vs other cells	Mann Whitney U test	0.874875			13C	amino acids	aerobic	24 hour	Calditenuis vs other cells	Mann Whitney U test	0.246909
13C	algal AA	aerobic	4 hour	Calditenuis vs other cells	Mann Whitney U test	0.597693			13C	formate	aerobic	24 hour	Calditenuis vs other cells	Mann Whitney U test	0.648303
13C	starch	aerobic	4 hour	Calditenuis vs other cells	Mann Whitney U test	0.547619			13C	acetate	aerobic	24 hour	Calditenuis vs other cells	Mann Whitney U test	0.282384
15N	bicarbonate	aerobic	4 hour	Calditenuis vs control	Mann Whitney U test	0.278604			13C	propionate	aerobic	24 hour	Calditenuis vs other cells	Mann Whitney U test	0.57668
15N	BPA	aerobic	4 hour	Calditenuis vs control	Mann Whitney U test	0.200217			13C	bicarbonate	aerobic	24 hour	Calditenuis vs other cells	Mann Whitney U test	0.571924
15N	algal AA	aerobic	4 hour	Calditenuis vs control	Mann Whitney U test	0.03996			13C	glucose	aerobic	24 hour	Calditenuis vs other cells	Mann Whitney U test	0.000346706
15N	starch	aerobic	4 hour	Calditenuis vs control	Mann Whitney U test	0.785714			13C	xylose	aerobic	24 hour	Calditenuis vs other cells	Mann Whitney U test	0.797203
15N	bicarbonate	aerobic	4 hour	Other cells vs control	Mann Whitney U test	0.527273			13C	ribose	aerobic	24 hour	Calditenuis vs other cells	Mann Whitney U test	0.473499
15N	BPA	aerobic	4 hour	Other cells vs control	Mann Whitney U test	0.539461			13C	butyrate	aerobic	24 hour	Calditenuis vs other cells	Mann Whitney U test	0.00299312
15N	algal AA	aerobic	4 hour	Other cells vs control	Mann Whitney U test	0.208563			15N	amino acids	aerobic	24 hour	Calditenuis vs control	Mann Whitney U test	0.000999001
15N	starch	aerobic	4 hour	Other cells vs control	Mann Whitney U test	0.47619			15N	formate	aerobic	24 hour	Calditenuis vs control	Mann Whitney U test	0.000323206
15N	bicarbonate	aerobic	4 hour	Calditenuis vs other cells	Mann Whitney U test	0.261411			15N	acetate	aerobic	24 hour	Calditenuis vs control	Mann Whitney U test	0.004329
15N	BPA	aerobic	4 hour	Calditenuis vs other cells	Mann Whitney U test	0.492258			15N	propionate	aerobic	24 hour	Calditenuis vs control	Mann Whitney U test	3.03948e-06
15N	algal AA	aerobic	4 hour	Calditenuis vs other cells	Mann Whitney U test	0.476913			15N	bicarbonate	aerobic	24 hour	Calditenuis vs control	Mann Whitney U test	0.00206398
15N	starch	aerobic	4 hour	Calditenuis vs other cells	Mann Whitney U test	0.261905			15N	glucose	aerobic	24 hour	Calditenuis vs control	Mann Whitney U test	7.59474e-05
13C	bicarbonate	aerobic	24 hour	Calditenuis vs control	Mann Whitney U test	0.029526			15N	xylose	aerobic	24 hour	Calditenuis vs control	Mann Whitney U test	0.018981
13C	BPA	aerobic	24 hour	Calditenuis vs control	Mann Whitney U test	0.254412			15N	ribose	aerobic	24 hour	Calditenuis vs control	Mann Whitney U test	0.000666001
13C	algal AA	aerobic	24 hour	Calditenuis vs control	Mann Whitney U test	0.00799201			15N	butyrate	aerobic	24 hour	Calditenuis vs control	Mann Whitney U test	2.035e-05
13C	starch	aerobic	24 hour	Calditenuis vs control	Mann Whitney U test	0.0479798			15N	amino acids	aerobic	24 hour	Calditenuis vs other cells	Mann Whitney U test	0.507876
13C	bicarbonate	aerobic	24 hour	Other cells vs control	Mann Whitney U test	0.00233918			15N	formate	aerobic	24 hour	Calditenuis vs other cells	Mann Whitney U test	0.0745895
13C	BPA	aerobic	24 hour	Other cells vs control	Mann Whitney U test	8.0032e-06			15N	acetate	aerobic	24 hour	Calditenuis vs other cells	Mann Whitney U test	0.141858
13C	algal AA	aerobic	24 hour	Other cells vs control	Mann Whitney U test	2.70948e-05			15N	propionate	aerobic	24 hour	Calditenuis vs other cells	Mann Whitney U test	0.835424
13C	starch	aerobic	24 hour	Other cells vs control	Mann Whitney U test	4.31258e-05			15N	bicarbonate	aerobic	24 hour	Calditenuis vs other cells	Mann Whitney U test	0.134053
13C	bicarbonate	aerobic	24 hour	Calditenuis vs other cells	Mann Whitney U test	0.000251485			15N	glucose	aerobic	24 hour	Calditenuis vs other cells	Mann Whitney U test	0.28738
13C	BPA	aerobic	24 hour	Calditenuis vs other cells	Mann Whitney U test	4.63145e-11			15N	xylose	aerobic	24 hour	Calditenuis vs other cells	Mann Whitney U test	0.606394
13C	algal AA	aerobic	24 hour	Calditenuis vs other cells	Mann Whitney U test	8.06043e-10			15N	ribose	aerobic	24 hour	Calditenuis vs other cells	Mann Whitney U test	0.333804
13C	starch	aerobic	24 hour	Calditenuis vs other cells	Mann Whitney U test	0.00372746			15N	butyrate	aerobic	24 hour	Calditenuis vs other cells	Mann Whitney U test	7.39685e-05
15N	bicarbonate	aerobic	24 hour	Calditenuis vs control	Mann Whitney U test	0.001554			13C	amino acids	aerobic	24 hour	Other cells vs control	Mann Whitney U test	0.0010989
15N	BPA	aerobic	24 hour	Calditenuis vs control	Mann Whitney U test	0.000666001			13C	formate	aerobic	24 hour	Other cells vs control	Mann Whitney U test	0.00361197
15N	algal AA	aerobic	24 hour	Calditenuis vs control	Mann Whitney U test	0.000666001			13C	acetate	aerobic	24 hour	Other cells vs control	Mann Whitney U test	0.0040404
15N	starch	aerobic	24 hour	Calditenuis vs control	Mann Whitney U test	0.14899			13C	propionate	aerobic	24 hour	Other cells vs control	Mann Whitney U test	0.000653595
15N	bicarbonate	aerobic	24 hour	Other cells vs control	Mann Whitney U test	0.000334169			13C	bicarbonate	aerobic	24 hour	Other cells vs control	Mann Whitney U test	0.00586081
15N	BPA	aerobic	24 hour	Other cells vs control	Mann Whitney U test	8e-06			13C	glucose	aerobic	24 hour	Other cells vs control	Mann Whitney U test	0.000273411
15N	algal AA	aerobic	24 hour	Other cells vs control	Mann Whitney U test	2.71e-05			13C	xylose	aerobic	24 hour	Other cells vs control	Mann Whitney U test	0.015873
15N	starch	aerobic	24 hour	Other cells vs control	Mann Whitney U test	0.000172503			13C	ribose	aerobic	24 hour	Other cells vs control	Mann Whitney U test	0.0177109
15N	bicarbonate	aerobic	24 hour	Calditenuis vs other cells	Mann Whitney U test	0.000347641			13C	butyrate	aerobic	24 hour	Other cells vs control	Mann Whitney U test	0.000803701
15N	BPA	aerobic	24 hour	Calditenuis vs other cells	Mann Whitney U test	4.63145e-11			15N	amino acids	aerobic	24 hour	Other cells vs control	Mann Whitney U test	0.0043956
15N	algal AA	aerobic	24 hour	Calditenuis vs other cells	Mann Whitney U test	8.06043e-10			15N	formate	aerobic	24 hour	Other cells vs control	Mann Whitney U test	0.00206398
15N	starch	aerobic	24 hour	Calditenuis vs other cells	Mann Whitney U test	0.0774035			15N	acetate	aerobic	24 hour	Other cells vs control	Mann Whitney U test	0.0040404
									15N	propionate	aerobic	24 hour	Other cells vs control	Mann Whitney U test	0.000653595
									15N	bicarbonate	aerobic	24 hour	Other cells vs control	Mann Whitney U test	0.225641
									15N	glucose	aerobic	24 hour	Other cells vs control	Mann Whitney U test	0.00328093
									15N	xylose	aerobic	24 hour	Other cells vs control	Mann Whitney U test	0.555556
									15N	ribose	aerobic	24 hour	Other cells vs control	Mann Whitney U test	0.361571
									15N	butyrate	aerobic	24 hour	Other cells vs control	Mann Whitney U test	0.0498669

## Sheet: Supplementary Table 4
Supplementary Table 4. FISH-NanoSIMS data from GBS sediments
Types	Substrate	Group	Condition	Time	Atom % excess
13C	bicarbonate	Calditenuis	aerobic	4 hour	-0.0148154
13C	bicarbonate	Calditenuis	aerobic	4 hour	-0.0156904
13C	bicarbonate	Calditenuis	aerobic	4 hour	-0.0057454
13C	bicarbonate	Calditenuis	aerobic	4 hour	-0.0110773
13C	bicarbonate	Calditenuis	aerobic	4 hour	-0.0875812
13C	bicarbonate	Calditenuis	aerobic	4 hour	-0.0633902
13C	bicarbonate	Calditenuis	aerobic	4 hour	-0.0458647
13C	bicarbonate	Calditenuis	aerobic	4 hour	-0.0409182
13C	bicarbonate	Calditenuis	aerobic	4 hour	-0.042584
13C	bicarbonate	Calditenuis	aerobic	4 hour	-0.0808088
13C	bicarbonate	Calditenuis	aerobic	4 hour	-0.0826907
13C	bicarbonate	Calditenuis	aerobic	4 hour	-0.0118709
13C	BPA	Calditenuis	aerobic	4 hour	-0.0158645
13C	BPA	Calditenuis	aerobic	4 hour	-0.00930356
13C	BPA	Calditenuis	aerobic	4 hour	-0.00978233
13C	BPA	Calditenuis	aerobic	4 hour	-0.007366
13C	BPA	Calditenuis	aerobic	4 hour	-0.0218711
13C	BPA	Calditenuis	aerobic	4 hour	0.679436
13C	algal AA	Calditenuis	aerobic	4 hour	-0.00836216
13C	algal AA	Calditenuis	aerobic	4 hour	-0.00673076
13C	algal AA	Calditenuis	aerobic	4 hour	-0.0107766
13C	algal AA	Calditenuis	aerobic	4 hour	0.0264878
13C	algal AA	Calditenuis	aerobic	4 hour	0.378043
13C	algal AA	Calditenuis	aerobic	4 hour	-0.00221702
13C	algal AA	Calditenuis	aerobic	4 hour	-0.0165778
13C	algal AA	Calditenuis	aerobic	4 hour	-0.0565688
13C	algal AA	Calditenuis	aerobic	4 hour	0.00878087
13C	algal AA	Calditenuis	aerobic	4 hour	-0.0323147
13C	starch	Calditenuis	aerobic	4 hour	-0.0268631
13C	starch	Calditenuis	aerobic	4 hour	-0.0185241
13C	starch	Calditenuis	aerobic	4 hour	-0.0307823
13C	bicarbonate	Other	aerobic	4 hour	-0.00571496
13C	bicarbonate	Other	aerobic	4 hour	-0.0217656
13C	bicarbonate	Other	aerobic	4 hour	-0.0106701
13C	bicarbonate	Other	aerobic	4 hour	-0.021614
13C	bicarbonate	Other	aerobic	4 hour	-0.0339654
13C	bicarbonate	Other	aerobic	4 hour	-0.0299537
13C	bicarbonate	Other	aerobic	4 hour	-0.0145595
13C	BPA	Other	aerobic	4 hour	-0.0267983
13C	BPA	Other	aerobic	4 hour	0.0003326
13C	BPA	Other	aerobic	4 hour	0.00419807
13C	BPA	Other	aerobic	4 hour	0.141887
13C	BPA	Other	aerobic	4 hour	-0.0513549
13C	BPA	Other	aerobic	4 hour	0.0891295
13C	BPA	Other	aerobic	4 hour	1.86653
13C	BPA	Other	aerobic	4 hour	-0.0122274
13C	BPA	Other	aerobic	4 hour	-0.0239511
13C	BPA	Other	aerobic	4 hour	-0.0801412
13C	algal AA	Other	aerobic	4 hour	12.0061
13C	algal AA	Other	aerobic	4 hour	0.019286
13C	algal AA	Other	aerobic	4 hour	-0.00267795
13C	algal AA	Other	aerobic	4 hour	6.05691
13C	algal AA	Other	aerobic	4 hour	0.00288191
13C	algal AA	Other	aerobic	4 hour	-0.00147752
13C	algal AA	Other	aerobic	4 hour	-0.0183623
13C	algal AA	Other	aerobic	4 hour	-0.0415063
13C	algal AA	Other	aerobic	4 hour	-0.0543224
13C	algal AA	Other	aerobic	4 hour	-0.00974401
13C	algal AA	Other	aerobic	4 hour	0.00618167
13C	algal AA	Other	aerobic	4 hour	-0.0396927
13C	algal AA	Other	aerobic	4 hour	-0.0396927
13C	algal AA	Other	aerobic	4 hour	0.690156
13C	algal AA	Other	aerobic	4 hour	-0.0121455
13C	algal AA	Other	aerobic	4 hour	0.11654
13C	algal AA	Other	aerobic	4 hour	-0.0245491
13C	algal AA	Other	aerobic	4 hour	0.222681
13C	algal AA	Other	aerobic	4 hour	0.125234
13C	starch	Other	aerobic	4 hour	-0.00908856
13C	starch	Other	aerobic	4 hour	-0.0473055
13C	starch	Other	aerobic	4 hour	-0.00721497
13C	starch	Other	aerobic	4 hour	-0.0281337
13C	starch	Other	aerobic	4 hour	0.33215
13C	starch	Other	aerobic	4 hour	-0.0245401
13C	bicarbonate	Calditenuis	aerobic	24 hour	0.220421
13C	bicarbonate	Calditenuis	aerobic	24 hour	-0.102312
13C	bicarbonate	Calditenuis	aerobic	24 hour	-0.0821396
13C	bicarbonate	Calditenuis	aerobic	24 hour	-0.0841041
13C	bicarbonate	Calditenuis	aerobic	24 hour	-0.1421
13C	bicarbonate	Calditenuis	aerobic	24 hour	-0.0343196
13C	bicarbonate	Calditenuis	aerobic	24 hour	-0.0369184
13C	bicarbonate	Calditenuis	aerobic	24 hour	-0.0349302
13C	BPA	Calditenuis	aerobic	24 hour	0.675297
13C	BPA	Calditenuis	aerobic	24 hour	0.00174515
13C	BPA	Calditenuis	aerobic	24 hour	-0.0980183
13C	BPA	Calditenuis	aerobic	24 hour	-0.0683923
13C	BPA	Calditenuis	aerobic	24 hour	0.00281108
13C	BPA	Calditenuis	aerobic	24 hour	-0.0210065
13C	BPA	Calditenuis	aerobic	24 hour	0.0241181
13C	BPA	Calditenuis	aerobic	24 hour	0.140559
13C	BPA	Calditenuis	aerobic	24 hour	0.0652608
13C	BPA	Calditenuis	aerobic	24 hour	0.154793
13C	algal AA	Calditenuis	aerobic	24 hour	1.02113
13C	algal AA	Calditenuis	aerobic	24 hour	-0.0293384
13C	algal AA	Calditenuis	aerobic	24 hour	0.467708
13C	algal AA	Calditenuis	aerobic	24 hour	0.111511
13C	algal AA	Calditenuis	aerobic	24 hour	0.0925688
13C	algal AA	Calditenuis	aerobic	24 hour	0.198297
13C	algal AA	Calditenuis	aerobic	24 hour	0.318112
13C	algal AA	Calditenuis	aerobic	24 hour	0.229213
13C	algal AA	Calditenuis	aerobic	24 hour	0.0490142
13C	algal AA	Calditenuis	aerobic	24 hour	0.18893
13C	starch	Calditenuis	aerobic	24 hour	0.0221339
13C	starch	Calditenuis	aerobic	24 hour	0.0499204
13C	starch	Calditenuis	aerobic	24 hour	0.00454267
13C	starch	Calditenuis	aerobic	24 hour	0.00516524
13C	starch	Calditenuis	aerobic	24 hour	8.7299e-05
13C	starch	Calditenuis	aerobic	24 hour	-0.000176385
13C	starch	Calditenuis	aerobic	24 hour	0.00142431
13C	control	Calditenuis	aerobic	-	-0.000904944
13C	control	Calditenuis	aerobic	-	0.00706964
13C	control	Calditenuis	aerobic	-	-0.029259
13C	control	Calditenuis	aerobic	-	-0.029468
13C	control	Calditenuis	aerobic	-	-0.0142052
13C	bicarbonate	Other	aerobic	24 hour	-0.0427998
13C	bicarbonate	Other	aerobic	24 hour	-0.0135936
13C	bicarbonate	Other	aerobic	24 hour	0.00535627
13C	bicarbonate	Other	aerobic	24 hour	0.174296
13C	bicarbonate	Other	aerobic	24 hour	3.39752
13C	bicarbonate	Other	aerobic	24 hour	0.025242
13C	bicarbonate	Other	aerobic	24 hour	2.21932
13C	bicarbonate	Other	aerobic	24 hour	3.73359
13C	bicarbonate	Other	aerobic	24 hour	0.12689
13C	bicarbonate	Other	aerobic	24 hour	5.69377
13C	bicarbonate	Other	aerobic	24 hour	0.328548
13C	bicarbonate	Other	aerobic	24 hour	0.210803
13C	bicarbonate	Other	aerobic	24 hour	2.30883
13C	bicarbonate	Other	aerobic	24 hour	1.5412
13C	bicarbonate	Other	aerobic	24 hour	3.20308
13C	bicarbonate	Other	aerobic	24 hour	1.65467
13C	bicarbonate	Other	aerobic	24 hour	3.18842
13C	BPA	Other	aerobic	24 hour	9.2883
13C	BPA	Other	aerobic	24 hour	9.87303
13C	BPA	Other	aerobic	24 hour	5.24359
13C	BPA	Other	aerobic	24 hour	12.1061
13C	BPA	Other	aerobic	24 hour	8.49263
13C	BPA	Other	aerobic	24 hour	25.8427
13C	BPA	Other	aerobic	24 hour	7.49058
13C	BPA	Other	aerobic	24 hour	24.3217
13C	BPA	Other	aerobic	24 hour	20.0281
13C	BPA	Other	aerobic	24 hour	23.0118
13C	BPA	Other	aerobic	24 hour	12.6472
13C	BPA	Other	aerobic	24 hour	7.41636
13C	BPA	Other	aerobic	24 hour	10.7223
13C	BPA	Other	aerobic	24 hour	10.8156
13C	BPA	Other	aerobic	24 hour	9.07395
13C	BPA	Other	aerobic	24 hour	17.7984
13C	BPA	Other	aerobic	24 hour	11.3858
13C	BPA	Other	aerobic	24 hour	16.2871
13C	BPA	Other	aerobic	24 hour	19.4372
13C	BPA	Other	aerobic	24 hour	14.5405
13C	BPA	Other	aerobic	24 hour	24.1455
13C	BPA	Other	aerobic	24 hour	17.2189
13C	BPA	Other	aerobic	24 hour	10.2695
13C	BPA	Other	aerobic	24 hour	9.90971
13C	BPA	Other	aerobic	24 hour	14.4849
13C	BPA	Other	aerobic	24 hour	14.9298
13C	BPA	Other	aerobic	24 hour	13.3057
13C	BPA	Other	aerobic	24 hour	14.5361
13C	BPA	Other	aerobic	24 hour	8.04736
13C	BPA	Other	aerobic	24 hour	10.5401
13C	BPA	Other	aerobic	24 hour	17.9572
13C	BPA	Other	aerobic	24 hour	6.8147
13C	BPA	Other	aerobic	24 hour	8.24475
13C	BPA	Other	aerobic	24 hour	8.15179
13C	BPA	Other	aerobic	24 hour	8.2852
13C	BPA	Other	aerobic	24 hour	9.69421
13C	BPA	Other	aerobic	24 hour	9.02255
13C	BPA	Other	aerobic	24 hour	9.71639
13C	BPA	Other	aerobic	24 hour	9.82271
13C	BPA	Other	aerobic	24 hour	11.2332
13C	BPA	Other	aerobic	24 hour	17.747
13C	BPA	Other	aerobic	24 hour	8.5592
13C	BPA	Other	aerobic	24 hour	8.51022
13C	BPA	Other	aerobic	24 hour	15.753
13C	BPA	Other	aerobic	24 hour	8.81155
13C	BPA	Other	aerobic	24 hour	3.42159
13C	BPA	Other	aerobic	24 hour	5.47894
13C	algal AA	Other	aerobic	24 hour	20.2683
13C	algal AA	Other	aerobic	24 hour	17.3392
13C	algal AA	Other	aerobic	24 hour	16.3517
13C	algal AA	Other	aerobic	24 hour	14.5339
13C	algal AA	Other	aerobic	24 hour	20.8628
13C	algal AA	Other	aerobic	24 hour	17.9561
13C	algal AA	Other	aerobic	24 hour	13.7435
13C	algal AA	Other	aerobic	24 hour	14.3973
13C	algal AA	Other	aerobic	24 hour	18.5066
13C	algal AA	Other	aerobic	24 hour	15.8126
13C	algal AA	Other	aerobic	24 hour	15.0982
13C	algal AA	Other	aerobic	24 hour	13.9798
13C	algal AA	Other	aerobic	24 hour	15.1608
13C	algal AA	Other	aerobic	24 hour	31.6134
13C	algal AA	Other	aerobic	24 hour	26.3752
13C	algal AA	Other	aerobic	24 hour	25.9024
13C	algal AA	Other	aerobic	24 hour	21.3876
13C	algal AA	Other	aerobic	24 hour	21.9039
13C	algal AA	Other	aerobic	24 hour	23.9912
13C	algal AA	Other	aerobic	24 hour	21.5666
13C	algal AA	Other	aerobic	24 hour	17.5343
13C	algal AA	Other	aerobic	24 hour	16.9338
13C	algal AA	Other	aerobic	24 hour	28.7614
13C	algal AA	Other	aerobic	24 hour	8.52519
13C	algal AA	Other	aerobic	24 hour	7.91502
13C	algal AA	Other	aerobic	24 hour	9.87196
13C	algal AA	Other	aerobic	24 hour	20.971
13C	algal AA	Other	aerobic	24 hour	23.2001
13C	algal AA	Other	aerobic	24 hour	28.068
13C	algal AA	Other	aerobic	24 hour	17.7196
13C	algal AA	Other	aerobic	24 hour	10.1052
13C	algal AA	Other	aerobic	24 hour	22.3811
13C	algal AA	Other	aerobic	24 hour	22.4415
13C	algal AA	Other	aerobic	24 hour	23.1525
13C	starch	Other	aerobic	24 hour	0.368807
13C	starch	Other	aerobic	24 hour	0.300961
13C	starch	Other	aerobic	24 hour	0.287896
13C	starch	Other	aerobic	24 hour	0.167458
13C	starch	Other	aerobic	24 hour	0.129517
13C	starch	Other	aerobic	24 hour	0.120722
13C	starch	Other	aerobic	24 hour	0.0512535
13C	starch	Other	aerobic	24 hour	0.0946298
13C	starch	Other	aerobic	24 hour	0.0266261
13C	starch	Other	aerobic	24 hour	0.0404004
13C	starch	Other	aerobic	24 hour	0.0573988
13C	starch	Other	aerobic	24 hour	0.0516808
13C	starch	Other	aerobic	24 hour	0.0418345
13C	starch	Other	aerobic	24 hour	0.0413122
13C	starch	Other	aerobic	24 hour	0.00474005
13C	starch	Other	aerobic	24 hour	0.00720498
13C	starch	Other	aerobic	24 hour	0.00849403
13C	starch	Other	aerobic	24 hour	0.00684319
13C	starch	Other	aerobic	24 hour	0.0415905
13C	starch	Other	aerobic	24 hour	0.0565285
13C	starch	Other	aerobic	24 hour	0.00722482
13C	starch	Other	aerobic	24 hour	0.00321011
13C	starch	Other	aerobic	24 hour	0.00346531
13C	starch	Other	aerobic	24 hour	0.0019524
13C	starch	Other	aerobic	24 hour	0.106557
13C	starch	Other	aerobic	24 hour	0.106531
13C	starch	Other	aerobic	24 hour	0.0160338
13C	starch	Other	aerobic	24 hour	0.00494536
13C	starch	Other	aerobic	24 hour	0.0515468
13C	starch	Other	aerobic	24 hour	0.0885787
13C	control	Other	aerobic	-	-0.0305725
13C	control	Other	aerobic	-	-0.049259
13C	control	Other	aerobic	-	-0.0319058
13C	control	Other	aerobic	-	-0.0196063
15N	bicarbonate	Calditenuis	aerobic	4 hour	0.00313799
15N	bicarbonate	Calditenuis	aerobic	4 hour	0.00881596
15N	bicarbonate	Calditenuis	aerobic	4 hour	0.0202368
15N	bicarbonate	Calditenuis	aerobic	4 hour	0.0255682
15N	bicarbonate	Calditenuis	aerobic	4 hour	0.00814836
15N	bicarbonate	Calditenuis	aerobic	4 hour	0.0187979
15N	bicarbonate	Calditenuis	aerobic	4 hour	0.00561661
15N	bicarbonate	Calditenuis	aerobic	4 hour	0.0122984
15N	bicarbonate	Calditenuis	aerobic	4 hour	0.0161767
15N	bicarbonate	Calditenuis	aerobic	4 hour	0.014297
15N	bicarbonate	Calditenuis	aerobic	4 hour	0.0518473
15N	bicarbonate	Calditenuis	aerobic	4 hour	0.014933
15N	BPA	Calditenuis	aerobic	4 hour	0.0061247
15N	BPA	Calditenuis	aerobic	4 hour	0.458196
15N	BPA	Calditenuis	aerobic	4 hour	0.0146008
15N	BPA	Calditenuis	aerobic	4 hour	0.0125285
15N	BPA	Calditenuis	aerobic	4 hour	0.014453
15N	BPA	Calditenuis	aerobic	4 hour	0.0168744
15N	algal AA	Calditenuis	aerobic	4 hour	0.0341939
15N	algal AA	Calditenuis	aerobic	4 hour	0.0110517
15N	algal AA	Calditenuis	aerobic	4 hour	0.0122105
15N	algal AA	Calditenuis	aerobic	4 hour	0.0743206
15N	algal AA	Calditenuis	aerobic	4 hour	0.00958718
15N	algal AA	Calditenuis	aerobic	4 hour	0.0175034
15N	algal AA	Calditenuis	aerobic	4 hour	0.0114433
15N	algal AA	Calditenuis	aerobic	4 hour	0.022413
15N	algal AA	Calditenuis	aerobic	4 hour	0.0172828
15N	algal AA	Calditenuis	aerobic	4 hour	0.375374
15N	starch	Calditenuis	aerobic	4 hour	0.0107719
15N	starch	Calditenuis	aerobic	4 hour	-0.00642989
15N	starch	Calditenuis	aerobic	4 hour	0.00833509
15N	control	Calditenuis	aerobic	-	0.0167337
15N	control	Calditenuis	aerobic	-	0.00620565
15N	control	Calditenuis	aerobic	-	0.00930024
15N	control	Calditenuis	aerobic	-	-0.0201355
15N	control	Calditenuis	aerobic	-	0.0125285
15N	bicarbonate	Other	aerobic	4 hour	0.0217329
15N	bicarbonate	Other	aerobic	4 hour	0.0149227
15N	bicarbonate	Other	aerobic	4 hour	0.0247559
15N	bicarbonate	Other	aerobic	4 hour	0.0480187
15N	bicarbonate	Other	aerobic	4 hour	0.285901
15N	bicarbonate	Other	aerobic	4 hour	0.00691499
15N	bicarbonate	Other	aerobic	4 hour	0.0134045
15N	BPA	Other	aerobic	4 hour	0.170071
15N	BPA	Other	aerobic	4 hour	0.0449149
15N	BPA	Other	aerobic	4 hour	3.99356
15N	BPA	Other	aerobic	4 hour	0.0269082
15N	BPA	Other	aerobic	4 hour	-0.00112217
15N	BPA	Other	aerobic	4 hour	-0.00245832
15N	BPA	Other	aerobic	4 hour	0.00697628
15N	BPA	Other	aerobic	4 hour	0.0183026
15N	BPA	Other	aerobic	4 hour	0.807054
15N	BPA	Other	aerobic	4 hour	0.0161356
15N	algal AA	Other	aerobic	4 hour	0.00643594
15N	algal AA	Other	aerobic	4 hour	0.0276139
15N	algal AA	Other	aerobic	4 hour	0.0139306
15N	algal AA	Other	aerobic	4 hour	0.015456
15N	algal AA	Other	aerobic	4 hour	0.0234984
15N	algal AA	Other	aerobic	4 hour	0.0283403
15N	algal AA	Other	aerobic	4 hour	0.0283403
15N	algal AA	Other	aerobic	4 hour	1.94715
15N	algal AA	Other	aerobic	4 hour	0.00816127
15N	algal AA	Other	aerobic	4 hour	0.0958282
15N	algal AA	Other	aerobic	4 hour	0.0143174
15N	algal AA	Other	aerobic	4 hour	0.121802
15N	algal AA	Other	aerobic	4 hour	0.131115
15N	algal AA	Other	aerobic	4 hour	7.99655
15N	algal AA	Other	aerobic	4 hour	0.0208605
15N	algal AA	Other	aerobic	4 hour	0.0129851
15N	algal AA	Other	aerobic	4 hour	6.73922
15N	algal AA	Other	aerobic	4 hour	0.00871604
15N	algal AA	Other	aerobic	4 hour	0.014879
15N	starch	Other	aerobic	4 hour	0.0139291
15N	starch	Other	aerobic	4 hour	-0.0272564
15N	starch	Other	aerobic	4 hour	0.0188633
15N	starch	Other	aerobic	4 hour	0.0105661
15N	starch	Other	aerobic	4 hour	0.015343
15N	starch	Other	aerobic	4 hour	0.0129884
15N	bicarbonate	Calditenuis	aerobic	24 hour	0.0578761
15N	bicarbonate	Calditenuis	aerobic	24 hour	0.0638871
15N	bicarbonate	Calditenuis	aerobic	24 hour	0.278539
15N	bicarbonate	Calditenuis	aerobic	24 hour	1.72089
15N	bicarbonate	Calditenuis	aerobic	24 hour	0.095535
15N	bicarbonate	Calditenuis	aerobic	24 hour	0.0393985
15N	bicarbonate	Calditenuis	aerobic	24 hour	0.0357606
15N	bicarbonate	Calditenuis	aerobic	24 hour	0.109033
15N	BPA	Calditenuis	aerobic	24 hour	0.139365
15N	BPA	Calditenuis	aerobic	24 hour	0.0543018
15N	BPA	Calditenuis	aerobic	24 hour	0.164318
15N	BPA	Calditenuis	aerobic	24 hour	0.509164
15N	BPA	Calditenuis	aerobic	24 hour	0.159462
15N	BPA	Calditenuis	aerobic	24 hour	0.30951
15N	BPA	Calditenuis	aerobic	24 hour	1.4865
15N	BPA	Calditenuis	aerobic	24 hour	0.388939
15N	BPA	Calditenuis	aerobic	24 hour	0.109363
15N	BPA	Calditenuis	aerobic	24 hour	0.0643382
15N	algal AA	Calditenuis	aerobic	24 hour	0.101641
15N	algal AA	Calditenuis	aerobic	24 hour	0.693893
15N	algal AA	Calditenuis	aerobic	24 hour	0.096193
15N	algal AA	Calditenuis	aerobic	24 hour	0.0389236
15N	algal AA	Calditenuis	aerobic	24 hour	0.108927
15N	algal AA	Calditenuis	aerobic	24 hour	0.45313
15N	algal AA	Calditenuis	aerobic	24 hour	0.0460788
15N	algal AA	Calditenuis	aerobic	24 hour	0.268337
15N	algal AA	Calditenuis	aerobic	24 hour	0.176412
15N	algal AA	Calditenuis	aerobic	24 hour	0.0979246
15N	starch	Calditenuis	aerobic	24 hour	0.902663
15N	starch	Calditenuis	aerobic	24 hour	1.31451
15N	starch	Calditenuis	aerobic	24 hour	0.173694
15N	starch	Calditenuis	aerobic	24 hour	0.134973
15N	starch	Calditenuis	aerobic	24 hour	0.00234197
15N	starch	Calditenuis	aerobic	24 hour	0.000811681
15N	starch	Calditenuis	aerobic	24 hour	0.130316
15N	bicarbonate	Other	aerobic	24 hour	0.038109
15N	bicarbonate	Other	aerobic	24 hour	0.248062
15N	bicarbonate	Other	aerobic	24 hour	0.548963
15N	bicarbonate	Other	aerobic	24 hour	16.4331
15N	bicarbonate	Other	aerobic	24 hour	8.89106
15N	bicarbonate	Other	aerobic	24 hour	1.26809
15N	bicarbonate	Other	aerobic	24 hour	10.6143
15N	bicarbonate	Other	aerobic	24 hour	18.6513
15N	bicarbonate	Other	aerobic	24 hour	28.5754
15N	bicarbonate	Other	aerobic	24 hour	20.3396
15N	bicarbonate	Other	aerobic	24 hour	16.6978
15N	bicarbonate	Other	aerobic	24 hour	12.1487
15N	bicarbonate	Other	aerobic	24 hour	10.8525
15N	bicarbonate	Other	aerobic	24 hour	9.70983
15N	bicarbonate	Other	aerobic	24 hour	10.9113
15N	bicarbonate	Other	aerobic	24 hour	9.4313
15N	bicarbonate	Other	aerobic	24 hour	19.8365
15N	BPA	Other	aerobic	24 hour	24.3504
15N	BPA	Other	aerobic	24 hour	15.596
15N	BPA	Other	aerobic	24 hour	20.3681
15N	BPA	Other	aerobic	24 hour	19.008
15N	BPA	Other	aerobic	24 hour	24.6918
15N	BPA	Other	aerobic	24 hour	29.847
15N	BPA	Other	aerobic	24 hour	27.6861
15N	BPA	Other	aerobic	24 hour	25.4734
15N	BPA	Other	aerobic	24 hour	22.9275
15N	BPA	Other	aerobic	24 hour	21.2999
15N	BPA	Other	aerobic	24 hour	25.9255
15N	BPA	Other	aerobic	24 hour	19.2787
15N	BPA	Other	aerobic	24 hour	24.5708
15N	BPA	Other	aerobic	24 hour	32.218
15N	BPA	Other	aerobic	24 hour	23.8268
15N	BPA	Other	aerobic	24 hour	30.6326
15N	BPA	Other	aerobic	24 hour	24.607
15N	BPA	Other	aerobic	24 hour	21.3158
15N	BPA	Other	aerobic	24 hour	26.2368
15N	BPA	Other	aerobic	24 hour	26.3612
15N	BPA	Other	aerobic	24 hour	23.9251
15N	BPA	Other	aerobic	24 hour	18.3139
15N	BPA	Other	aerobic	24 hour	15.9647
15N	BPA	Other	aerobic	24 hour	24.0027
15N	BPA	Other	aerobic	24 hour	21.9929
15N	BPA	Other	aerobic	24 hour	24.8409
15N	BPA	Other	aerobic	24 hour	25.4914
15N	BPA	Other	aerobic	24 hour	19.1548
15N	BPA	Other	aerobic	24 hour	15.2044
15N	BPA	Other	aerobic	24 hour	28.7185
15N	BPA	Other	aerobic	24 hour	31.9168
15N	BPA	Other	aerobic	24 hour	25.2736
15N	BPA	Other	aerobic	24 hour	19.4387
15N	BPA	Other	aerobic	24 hour	21.855
15N	BPA	Other	aerobic	24 hour	17.8713
15N	BPA	Other	aerobic	24 hour	22.102
15N	BPA	Other	aerobic	24 hour	16.0923
15N	BPA	Other	aerobic	24 hour	26.8326
15N	BPA	Other	aerobic	24 hour	16.2986
15N	BPA	Other	aerobic	24 hour	14.5645
15N	BPA	Other	aerobic	24 hour	14.2051
15N	BPA	Other	aerobic	24 hour	12.9486
15N	BPA	Other	aerobic	24 hour	21.8088
15N	BPA	Other	aerobic	24 hour	17.13
15N	BPA	Other	aerobic	24 hour	13.9066
15N	BPA	Other	aerobic	24 hour	13.523
15N	BPA	Other	aerobic	24 hour	22.7149
15N	algal AA	Other	aerobic	24 hour	5.68307
15N	algal AA	Other	aerobic	24 hour	3.51667
15N	algal AA	Other	aerobic	24 hour	4.61638
15N	algal AA	Other	aerobic	24 hour	7.02082
15N	algal AA	Other	aerobic	24 hour	6.30334
15N	algal AA	Other	aerobic	24 hour	11.4967
15N	algal AA	Other	aerobic	24 hour	7.5646
15N	algal AA	Other	aerobic	24 hour	5.47412
15N	algal AA	Other	aerobic	24 hour	8.90652
15N	algal AA	Other	aerobic	24 hour	5.95449
15N	algal AA	Other	aerobic	24 hour	6.20072
15N	algal AA	Other	aerobic	24 hour	5.78732
15N	algal AA	Other	aerobic	24 hour	4.3488
15N	algal AA	Other	aerobic	24 hour	7.12296
15N	algal AA	Other	aerobic	24 hour	27.9853
15N	algal AA	Other	aerobic	24 hour	19.078
15N	algal AA	Other	aerobic	24 hour	22.4374
15N	algal AA	Other	aerobic	24 hour	4.85372
15N	algal AA	Other	aerobic	24 hour	5.98686
15N	algal AA	Other	aerobic	24 hour	9.41911
15N	algal AA	Other	aerobic	24 hour	7.8567
15N	algal AA	Other	aerobic	24 hour	2.51078
15N	algal AA	Other	aerobic	24 hour	5.94446
15N	algal AA	Other	aerobic	24 hour	8.43926
15N	algal AA	Other	aerobic	24 hour	7.55121
15N	algal AA	Other	aerobic	24 hour	8.99135
15N	algal AA	Other	aerobic	24 hour	8.17815
15N	algal AA	Other	aerobic	24 hour	6.92162
15N	algal AA	Other	aerobic	24 hour	6.96093
15N	algal AA	Other	aerobic	24 hour	5.13536
15N	algal AA	Other	aerobic	24 hour	6.68303
15N	algal AA	Other	aerobic	24 hour	6.75935
15N	algal AA	Other	aerobic	24 hour	5.02248
15N	algal AA	Other	aerobic	24 hour	6.08883
15N	starch	Other	aerobic	24 hour	15.7316
15N	starch	Other	aerobic	24 hour	13.1696
15N	starch	Other	aerobic	24 hour	9.89712
15N	starch	Other	aerobic	24 hour	8.29901
15N	starch	Other	aerobic	24 hour	4.60317
15N	starch	Other	aerobic	24 hour	0.245667
15N	starch	Other	aerobic	24 hour	0.21813
15N	starch	Other	aerobic	24 hour	0.257846
15N	starch	Other	aerobic	24 hour	0.165307
15N	starch	Other	aerobic	24 hour	0.201166
15N	starch	Other	aerobic	24 hour	0.217956
15N	starch	Other	aerobic	24 hour	0.199061
15N	starch	Other	aerobic	24 hour	0.195047
15N	starch	Other	aerobic	24 hour	0.229495
15N	starch	Other	aerobic	24 hour	0.180129
15N	starch	Other	aerobic	24 hour	0.247986
15N	starch	Other	aerobic	24 hour	0.216627
15N	starch	Other	aerobic	24 hour	0.230665
15N	starch	Other	aerobic	24 hour	0.165058
15N	starch	Other	aerobic	24 hour	0.220444
15N	starch	Other	aerobic	24 hour	0.280443
15N	starch	Other	aerobic	24 hour	0.233063
15N	starch	Other	aerobic	24 hour	0.0194047
15N	starch	Other	aerobic	24 hour	0.0315039
15N	starch	Other	aerobic	24 hour	0.207743
15N	starch	Other	aerobic	24 hour	0.221942
15N	starch	Other	aerobic	24 hour	0.169096
15N	starch	Other	aerobic	24 hour	0.205038
15N	starch	Other	aerobic	24 hour	0.211702
15N	starch	Other	aerobic	24 hour	0.262886
15N	control	Other	aerobic	-	0.0204351
15N	control	Other	aerobic	-	0.0260769
15N	control	Other	aerobic	-	0.00445214
15N	control	Other	aerobic	-	0.0135118

## Sheet: Supplementary Table 5
Supplementary Table 5. Isotope-labeling experiments on lab cultures
Culture ID	Incubation time (hrs.)	13C label1	15N-NH4Cl (50 µM)
Lab 1	6	Bicarbonate (0.5 µM)	+
Lab 2	6	Formate (0.5 µM)	+
Lab 3	6	Acetate (0.5 µM)	+
Lab 4	6	Propionate (0.5 µM)	+
Lab 5	6	Butyrate (0.5 µM)	+
Lab 6	6	Algal AA (0.005%)	+
Lab 7	6	Glucose (0.005%)	+
Lab 8	6	Xylose (0.005%)	+
Lab 9	6	Ribose (0.005%)	+
Lab 10	6	-	-
Lab 11	24	Bicarbonate (0.5 µM)	+
Lab 12	24	Formate (0.5 µM)	+
Lab 13	24	Acetate (0.5 µM)	+
Lab 14	24	Propionate (0.5 µM)	+
Lab 15	24	Butyrate (0.5 µM)	+
Lab 16	24	Algal AA (0.005%)	+
Lab 17	24	Glucose (0.005%)	+
Lab 18	24	Xylose (0.005%)	+
Lab 19	24	Ribose (0.005%)	+
Lab 20	24	-	-
1Abbreviations: AA - Amino Acids

## Sheet: Supplementary Table 6
Supplementary Table 6. FISH-NanoSIMS data from lab cultures
Types	Substrate	Group	Condition	Time	Atom % excess
13C	amino acids	Calditenuis	aerobic	24 hour	17.8497
13C	amino acids	Calditenuis	aerobic	24 hour	25.7904
13C	amino acids	Calditenuis	aerobic	24 hour	14.8432
13C	amino acids	Calditenuis	aerobic	24 hour	17.3446
13C	amino acids	Calditenuis	aerobic	24 hour	15.4312
13C	amino acids	Calditenuis	aerobic	24 hour	16.4139
13C	amino acids	Calditenuis	aerobic	24 hour	22.8438
13C	amino acids	Calditenuis	aerobic	24 hour	16.9565
13C	amino acids	Calditenuis	aerobic	24 hour	12.205
13C	formate	Calditenuis	aerobic	24 hour	0.0327925
13C	formate	Calditenuis	aerobic	24 hour	-0.0222346
13C	formate	Calditenuis	aerobic	24 hour	0.0240199
13C	formate	Calditenuis	aerobic	24 hour	0.0461278
13C	formate	Calditenuis	aerobic	24 hour	0.0174096
13C	formate	Calditenuis	aerobic	24 hour	0.00040692
13C	formate	Calditenuis	aerobic	24 hour	-0.103909
13C	formate	Calditenuis	aerobic	24 hour	0.00718474
13C	formate	Calditenuis	aerobic	24 hour	0.00400496
13C	formate	Calditenuis	aerobic	24 hour	0.039069
13C	formate	Calditenuis	aerobic	24 hour	0.0147887
13C	formate	Calditenuis	aerobic	24 hour	0.0304045
13C	acetate	Calditenuis	aerobic	24 hour	1.95532
13C	acetate	Calditenuis	aerobic	24 hour	2.29241
13C	acetate	Calditenuis	aerobic	24 hour	3.12034
13C	acetate	Calditenuis	aerobic	24 hour	0.313623
13C	acetate	Calditenuis	aerobic	24 hour	1.16074
13C	acetate	Calditenuis	aerobic	24 hour	2.28104
13C	propionate	Calditenuis	aerobic	24 hour	5.52123
13C	propionate	Calditenuis	aerobic	24 hour	6.47845
13C	propionate	Calditenuis	aerobic	24 hour	7.35964
13C	propionate	Calditenuis	aerobic	24 hour	5.1719
13C	propionate	Calditenuis	aerobic	24 hour	0.8804
13C	propionate	Calditenuis	aerobic	24 hour	1.31053
13C	propionate	Calditenuis	aerobic	24 hour	3.00073
13C	propionate	Calditenuis	aerobic	24 hour	5.99615
13C	propionate	Calditenuis	aerobic	24 hour	4.33129
13C	propionate	Calditenuis	aerobic	24 hour	3.52962
13C	propionate	Calditenuis	aerobic	24 hour	4.06558
13C	propionate	Calditenuis	aerobic	24 hour	2.93191
13C	propionate	Calditenuis	aerobic	24 hour	4.0704
13C	propionate	Calditenuis	aerobic	24 hour	6.40245
13C	propionate	Calditenuis	aerobic	24 hour	5.19135
13C	propionate	Calditenuis	aerobic	24 hour	8.33555
13C	propionate	Calditenuis	aerobic	24 hour	0.171615
13C	propionate	Calditenuis	aerobic	24 hour	6.30635
13C	propionate	Calditenuis	aerobic	24 hour	1.9792
13C	propionate	Calditenuis	aerobic	24 hour	5.22334
13C	propionate	Calditenuis	aerobic	24 hour	0.654495
13C	propionate	Calditenuis	aerobic	24 hour	2.17594
13C	propionate	Calditenuis	aerobic	24 hour	5.34856
13C	propionate	Calditenuis	aerobic	24 hour	5.71234
13C	propionate	Calditenuis	aerobic	24 hour	4.40522
13C	propionate	Calditenuis	aerobic	24 hour	4.83984
13C	propionate	Calditenuis	aerobic	24 hour	1.40019
13C	propionate	Calditenuis	aerobic	24 hour	2.99695
13C	propionate	Calditenuis	aerobic	24 hour	3.80415
13C	propionate	Calditenuis	aerobic	24 hour	6.30751
13C	propionate	Calditenuis	aerobic	24 hour	5.49549
13C	propionate	Calditenuis	aerobic	24 hour	6.63422
13C	propionate	Calditenuis	aerobic	24 hour	5.25476
13C	propionate	Calditenuis	aerobic	24 hour	7.34636
13C	propionate	Calditenuis	aerobic	24 hour	7.26188
13C	bicarbonate	Calditenuis	aerobic	24 hour	-0.00204277
13C	bicarbonate	Calditenuis	aerobic	24 hour	0.0332035
13C	bicarbonate	Calditenuis	aerobic	24 hour	0.00329456
13C	bicarbonate	Calditenuis	aerobic	24 hour	0.0330285
13C	bicarbonate	Calditenuis	aerobic	24 hour	0.0621596
13C	bicarbonate	Calditenuis	aerobic	24 hour	-0.000987579
13C	bicarbonate	Calditenuis	aerobic	24 hour	0.00197739
13C	bicarbonate	Calditenuis	aerobic	24 hour	0.0147603
13C	bicarbonate	Calditenuis	aerobic	24 hour	0.0190685
13C	bicarbonate	Calditenuis	aerobic	24 hour	0.0197195
13C	bicarbonate	Calditenuis	aerobic	24 hour	0.00954744
13C	bicarbonate	Calditenuis	aerobic	24 hour	0.0115908
13C	bicarbonate	Calditenuis	aerobic	24 hour	0.0246103
13C	bicarbonate	Calditenuis	aerobic	24 hour	0.0182625
13C	glucose	Calditenuis	aerobic	24 hour	0.15365
13C	glucose	Calditenuis	aerobic	24 hour	0.162095
13C	glucose	Calditenuis	aerobic	24 hour	0.177349
13C	glucose	Calditenuis	aerobic	24 hour	7.81392
13C	glucose	Calditenuis	aerobic	24 hour	0.708729
13C	glucose	Calditenuis	aerobic	24 hour	0.563189
13C	glucose	Calditenuis	aerobic	24 hour	2.16087
13C	glucose	Calditenuis	aerobic	24 hour	0.184721
13C	glucose	Calditenuis	aerobic	24 hour	0.134352
13C	glucose	Calditenuis	aerobic	24 hour	0.852628
13C	glucose	Calditenuis	aerobic	24 hour	0.206804
13C	glucose	Calditenuis	aerobic	24 hour	0.110238
13C	glucose	Calditenuis	aerobic	24 hour	1.64734
13C	glucose	Calditenuis	aerobic	24 hour	2.02375
13C	glucose	Calditenuis	aerobic	24 hour	0.378775
13C	glucose	Calditenuis	aerobic	24 hour	0.130509
13C	glucose	Calditenuis	aerobic	24 hour	0.188721
13C	xylose	Calditenuis	aerobic	24 hour	0.0192117
13C	xylose	Calditenuis	aerobic	24 hour	0.199151
13C	xylose	Calditenuis	aerobic	24 hour	1.70605
13C	xylose	Calditenuis	aerobic	24 hour	0.0639312
13C	xylose	Calditenuis	aerobic	24 hour	1.77413
13C	xylose	Calditenuis	aerobic	24 hour	-0.00375811
13C	xylose	Calditenuis	aerobic	24 hour	1.65111
13C	xylose	Calditenuis	aerobic	24 hour	1.42807
13C	xylose	Calditenuis	aerobic	24 hour	1.6367
13C	ribose	Calditenuis	aerobic	24 hour	0.482029
13C	ribose	Calditenuis	aerobic	24 hour	0.456398
13C	ribose	Calditenuis	aerobic	24 hour	0.678836
13C	ribose	Calditenuis	aerobic	24 hour	0.49983
13C	ribose	Calditenuis	aerobic	24 hour	1.19826
13C	ribose	Calditenuis	aerobic	24 hour	0.660696
13C	ribose	Calditenuis	aerobic	24 hour	0.803495
13C	ribose	Calditenuis	aerobic	24 hour	0.425583
13C	ribose	Calditenuis	aerobic	24 hour	0.523923
13C	ribose	Calditenuis	aerobic	24 hour	0.557068
13C	butyrate	Calditenuis	aerobic	24 hour	0.174586
13C	butyrate	Calditenuis	aerobic	24 hour	4.67626
13C	butyrate	Calditenuis	aerobic	24 hour	0.935241
13C	butyrate	Calditenuis	aerobic	24 hour	0.816648
13C	butyrate	Calditenuis	aerobic	24 hour	1.51446
13C	butyrate	Calditenuis	aerobic	24 hour	1.79705
13C	butyrate	Calditenuis	aerobic	24 hour	0.745698
13C	butyrate	Calditenuis	aerobic	24 hour	1.15209
13C	butyrate	Calditenuis	aerobic	24 hour	0.926594
13C	butyrate	Calditenuis	aerobic	24 hour	1.00432
13C	butyrate	Calditenuis	aerobic	24 hour	1.98345
13C	butyrate	Calditenuis	aerobic	24 hour	0.931926
13C	butyrate	Calditenuis	aerobic	24 hour	1.20438
13C	butyrate	Calditenuis	aerobic	24 hour	0.0613543
13C	butyrate	Calditenuis	aerobic	24 hour	0.128087
13C	butyrate	Calditenuis	aerobic	24 hour	1.65691
13C	butyrate	Calditenuis	aerobic	24 hour	1.96593
13C	butyrate	Calditenuis	aerobic	24 hour	0.890228
13C	butyrate	Calditenuis	aerobic	24 hour	0.818346
13C	butyrate	Calditenuis	aerobic	24 hour	1.18011
13C	butyrate	Calditenuis	aerobic	24 hour	0.995371
13C	butyrate	Calditenuis	aerobic	24 hour	1.45911
13C	butyrate	Calditenuis	aerobic	24 hour	1.65935
13C	control	Calditenuis	aerobic	-	-0.000904944
13C	control	Calditenuis	aerobic	-	0.00706964
13C	control	Calditenuis	aerobic	-	-0.029259
13C	control	Calditenuis	aerobic	-	-0.029468
13C	control	Calditenuis	aerobic	-	-0.0142052
13C	amino acids	Other	aerobic	24 hour	20.1083
13C	amino acids	Other	aerobic	24 hour	22.8098
13C	amino acids	Other	aerobic	24 hour	16.6554
13C	amino acids	Other	aerobic	24 hour	0.60418
13C	amino acids	Other	aerobic	24 hour	15.7403
13C	amino acids	Other	aerobic	24 hour	19.4038
13C	amino acids	Other	aerobic	24 hour	23.9588
13C	amino acids	Other	aerobic	24 hour	26.109
13C	amino acids	Other	aerobic	24 hour	13.3936
13C	amino acids	Other	aerobic	24 hour	26.3053
13C	amino acids	Other	aerobic	24 hour	30.307
13C	amino acids	Other	aerobic	24 hour	22.3006
13C	formate	Other	aerobic	24 hour	0.0363691
13C	formate	Other	aerobic	24 hour	-0.013265
13C	formate	Other	aerobic	24 hour	0.0139391
13C	formate	Other	aerobic	24 hour	0.0112115
13C	formate	Other	aerobic	24 hour	0.0362143
13C	formate	Other	aerobic	24 hour	-0.00568672
13C	formate	Other	aerobic	24 hour	-0.0344023
13C	formate	Other	aerobic	24 hour	0.0217327
13C	formate	Other	aerobic	24 hour	0.0205519
13C	formate	Other	aerobic	24 hour	-0.000238495
13C	formate	Other	aerobic	24 hour	0.0486728
13C	formate	Other	aerobic	24 hour	-0.00641437
13C	formate	Other	aerobic	24 hour	0.0417043
13C	formate	Other	aerobic	24 hour	-0.0111727
13C	formate	Other	aerobic	24 hour	-0.0160523
13C	acetate	Other	aerobic	24 hour	0.988463
13C	acetate	Other	aerobic	24 hour	0.0245311
13C	acetate	Other	aerobic	24 hour	0.974959
13C	acetate	Other	aerobic	24 hour	1.06964
13C	acetate	Other	aerobic	24 hour	1.20884
13C	acetate	Other	aerobic	24 hour	1.21465
13C	acetate	Other	aerobic	24 hour	3.40115
13C	acetate	Other	aerobic	24 hour	1.43101
13C	propionate	Other	aerobic	24 hour	1.03733
13C	propionate	Other	aerobic	24 hour	6.0398
13C	propionate	Other	aerobic	24 hour	7.68334
13C	propionate	Other	aerobic	24 hour	10.5802
13C	propionate	Other	aerobic	24 hour	3.1171
13C	propionate	Other	aerobic	24 hour	12.1083
13C	propionate	Other	aerobic	24 hour	3.97684
13C	propionate	Other	aerobic	24 hour	2.10438
13C	propionate	Other	aerobic	24 hour	0.219848
13C	propionate	Other	aerobic	24 hour	3.24409
13C	propionate	Other	aerobic	24 hour	3.87503
13C	propionate	Other	aerobic	24 hour	9.85913
13C	propionate	Other	aerobic	24 hour	11.8791
13C	propionate	Other	aerobic	24 hour	5.00014
13C	bicarbonate	Other	aerobic	24 hour	0.0169609
13C	bicarbonate	Other	aerobic	24 hour	-0.0286916
13C	bicarbonate	Other	aerobic	24 hour	0.0064607
13C	bicarbonate	Other	aerobic	24 hour	-0.0227052
13C	bicarbonate	Other	aerobic	24 hour	-0.000877073
13C	bicarbonate	Other	aerobic	24 hour	0.00368423
13C	bicarbonate	Other	aerobic	24 hour	0.0866124
13C	bicarbonate	Other	aerobic	24 hour	0.0088645
13C	bicarbonate	Other	aerobic	24 hour	0.0385785
13C	bicarbonate	Other	aerobic	24 hour	0.0250951
13C	bicarbonate	Other	aerobic	24 hour	0.0167859
13C	glucose	Other	aerobic	24 hour	0.0220782
13C	glucose	Other	aerobic	24 hour	1.88273
13C	glucose	Other	aerobic	24 hour	7.00527
13C	glucose	Other	aerobic	24 hour	10.4412
13C	glucose	Other	aerobic	24 hour	5.43049
13C	glucose	Other	aerobic	24 hour	0.8906
13C	glucose	Other	aerobic	24 hour	4.98235
13C	glucose	Other	aerobic	24 hour	0.113874
13C	glucose	Other	aerobic	24 hour	7.7118
13C	glucose	Other	aerobic	24 hour	9.46119
13C	glucose	Other	aerobic	24 hour	6.73745
13C	glucose	Other	aerobic	24 hour	8.78187
13C	glucose	Other	aerobic	24 hour	9.2401
13C	glucose	Other	aerobic	24 hour	10.2881
13C	glucose	Other	aerobic	24 hour	9.40335
13C	glucose	Other	aerobic	24 hour	2.12563
13C	glucose	Other	aerobic	24 hour	7.43203
13C	glucose	Other	aerobic	24 hour	5.55756
13C	xylose	Other	aerobic	24 hour	4.86784
13C	xylose	Other	aerobic	24 hour	0.0106312
13C	xylose	Other	aerobic	24 hour	0.0101698
13C	xylose	Other	aerobic	24 hour	-0.00876855
13C	xylose	Other	aerobic	24 hour	1.83425
13C	ribose	Other	aerobic	24 hour	6.97515
13C	ribose	Other	aerobic	24 hour	0.00449386
13C	ribose	Other	aerobic	24 hour	0.355202
13C	ribose	Other	aerobic	24 hour	7.99338
13C	ribose	Other	aerobic	24 hour	5.65726
13C	ribose	Other	aerobic	24 hour	-0.0940506
13C	ribose	Other	aerobic	24 hour	8.2674
13C	ribose	Other	aerobic	24 hour	7.61621
13C	ribose	Other	aerobic	24 hour	9.42661
13C	ribose	Other	aerobic	24 hour	0.0565908
13C	ribose	Other	aerobic	24 hour	-0.0768896
13C	ribose	Other	aerobic	24 hour	9.48672
13C	ribose	Other	aerobic	24 hour	6.93551
13C	ribose	Other	aerobic	24 hour	0.115759
13C	ribose	Other	aerobic	24 hour	0.129503
13C	ribose	Other	aerobic	24 hour	7.87693
13C	ribose	Other	aerobic	24 hour	7.81509
13C	butyrate	Other	aerobic	24 hour	-0.0185756
13C	butyrate	Other	aerobic	24 hour	0.103974
13C	butyrate	Other	aerobic	24 hour	1.7362
13C	butyrate	Other	aerobic	24 hour	1.8663
13C	butyrate	Other	aerobic	24 hour	1.05589
13C	butyrate	Other	aerobic	24 hour	0.535812
13C	butyrate	Other	aerobic	24 hour	4.15754
13C	butyrate	Other	aerobic	24 hour	3.55201
13C	butyrate	Other	aerobic	24 hour	3.45912
13C	butyrate	Other	aerobic	24 hour	3.77522
13C	butyrate	Other	aerobic	24 hour	0.0415492
13C	butyrate	Other	aerobic	24 hour	3.02219
13C	butyrate	Other	aerobic	24 hour	2.29397
13C	butyrate	Other	aerobic	24 hour	2.61684
13C	butyrate	Other	aerobic	24 hour	4.59257
13C	butyrate	Other	aerobic	24 hour	4.19014
13C	butyrate	Other	aerobic	24 hour	4.82672
13C	butyrate	Other	aerobic	24 hour	4.22509
13C	butyrate	Other	aerobic	24 hour	9.66623
13C	butyrate	Other	aerobic	24 hour	0.1075
13C	butyrate	Other	aerobic	24 hour	0.0521038
13C	butyrate	Other	aerobic	24 hour	0.0257014
13C	butyrate	Other	aerobic	24 hour	3.74207
13C	butyrate	Other	aerobic	24 hour	0.0247849
13C	butyrate	Other	aerobic	24 hour	0.144033
13C	butyrate	Other	aerobic	24 hour	0.32418
13C	butyrate	Other	aerobic	24 hour	-0.0187758
13C	butyrate	Other	aerobic	24 hour	0.845343
13C	butyrate	Other	aerobic	24 hour	0.133713
13C	butyrate	Other	aerobic	24 hour	0.907344
13C	butyrate	Other	aerobic	24 hour	0.773105
13C	butyrate	Other	aerobic	24 hour	0.0719801
13C	butyrate	Other	aerobic	24 hour	0.583641
13C	butyrate	Other	aerobic	24 hour	0.211618
13C	butyrate	Other	aerobic	24 hour	0.178267
13C	butyrate	Other	aerobic	24 hour	0.0901016
13C	butyrate	Other	aerobic	24 hour	0.0236279
13C	butyrate	Other	aerobic	24 hour	0.0520436
13C	butyrate	Other	aerobic	24 hour	0.152837
13C	butyrate	Other	aerobic	24 hour	0.238727
13C	butyrate	Other	aerobic	24 hour	0.0444472
13C	butyrate	Other	aerobic	24 hour	-0.0137741
13C	butyrate	Other	aerobic	24 hour	0.13727
13C	butyrate	Other	aerobic	24 hour	0.0188764
13C	butyrate	Other	aerobic	24 hour	0.430639
13C	butyrate	Other	aerobic	24 hour	0.524475
13C	butyrate	Other	aerobic	24 hour	1.02251
13C	butyrate	Other	aerobic	24 hour	0.0612028
13C	butyrate	Other	aerobic	24 hour	0.0108503
13C	butyrate	Other	aerobic	24 hour	0.566206
13C	butyrate	Other	aerobic	24 hour	0.0607234
13C	butyrate	Other	aerobic	24 hour	0.0086307
13C	butyrate	Other	aerobic	24 hour	-0.00660855
13C	butyrate	Other	aerobic	24 hour	0.533598
13C	butyrate	Other	aerobic	24 hour	1.92968
13C	butyrate	Other	aerobic	24 hour	0.0236441
13C	butyrate	Other	aerobic	24 hour	0.0324148
13C	butyrate	Other	aerobic	24 hour	0.148244
13C	butyrate	Other	aerobic	24 hour	0.599476
13C	butyrate	Other	aerobic	24 hour	0.144651
13C	butyrate	Other	aerobic	24 hour	0.533251
13C	butyrate	Other	aerobic	24 hour	0.170379
13C	butyrate	Other	aerobic	24 hour	0.00581889
13C	butyrate	Other	aerobic	24 hour	0.0757839
13C	butyrate	Other	aerobic	24 hour	0.320029
13C	butyrate	Other	aerobic	24 hour	1.19265
13C	butyrate	Other	aerobic	24 hour	0.521502
13C	butyrate	Other	aerobic	24 hour	0.0802314
13C	butyrate	Other	aerobic	24 hour	0.436369
13C	butyrate	Other	aerobic	24 hour	0.0508767
13C	butyrate	Other	aerobic	24 hour	0.807504
13C	butyrate	Other	aerobic	24 hour	0.0545073
13C	butyrate	Other	aerobic	24 hour	0.32228
13C	butyrate	Other	aerobic	24 hour	0.402539
13C	butyrate	Other	aerobic	24 hour	6.51016
13C	butyrate	Other	aerobic	24 hour	2.28813
13C	butyrate	Other	aerobic	24 hour	1.34792
13C	butyrate	Other	aerobic	24 hour	0.200281
13C	butyrate	Other	aerobic	24 hour	0.007806
13C	butyrate	Other	aerobic	24 hour	-0.00126089
13C	butyrate	Other	aerobic	24 hour	1.01861
13C	control	Other	aerobic	-	-0.0305725
13C	control	Other	aerobic	-	-0.049259
13C	control	Other	aerobic	-	-0.0319058
13C	control	Other	aerobic	-	-0.0196063
15N	amino acids	Calditenuis	aerobic	24 hour	0.410479
15N	amino acids	Calditenuis	aerobic	24 hour	0.510164
15N	amino acids	Calditenuis	aerobic	24 hour	0.421588
15N	amino acids	Calditenuis	aerobic	24 hour	0.447807
15N	amino acids	Calditenuis	aerobic	24 hour	0.393753
15N	amino acids	Calditenuis	aerobic	24 hour	0.425332
15N	amino acids	Calditenuis	aerobic	24 hour	0.507097
15N	amino acids	Calditenuis	aerobic	24 hour	0.283001
15N	amino acids	Calditenuis	aerobic	24 hour	0.333506
15N	formate	Calditenuis	aerobic	24 hour	0.136338
15N	formate	Calditenuis	aerobic	24 hour	0.177413
15N	formate	Calditenuis	aerobic	24 hour	0.141379
15N	formate	Calditenuis	aerobic	24 hour	0.178894
15N	formate	Calditenuis	aerobic	24 hour	0.167108
15N	formate	Calditenuis	aerobic	24 hour	0.165859
15N	formate	Calditenuis	aerobic	24 hour	0.177544
15N	formate	Calditenuis	aerobic	24 hour	0.127643
15N	formate	Calditenuis	aerobic	24 hour	0.117257
15N	formate	Calditenuis	aerobic	24 hour	0.168083
15N	formate	Calditenuis	aerobic	24 hour	0.167823
15N	formate	Calditenuis	aerobic	24 hour	0.151746
15N	acetate	Calditenuis	aerobic	24 hour	0.202995
15N	acetate	Calditenuis	aerobic	24 hour	0.211211
15N	acetate	Calditenuis	aerobic	24 hour	0.329354
15N	acetate	Calditenuis	aerobic	24 hour	0.0628201
15N	acetate	Calditenuis	aerobic	24 hour	0.16041
15N	acetate	Calditenuis	aerobic	24 hour	0.209584
15N	propionate	Calditenuis	aerobic	24 hour	0.231251
15N	propionate	Calditenuis	aerobic	24 hour	0.342372
15N	propionate	Calditenuis	aerobic	24 hour	0.405319
15N	propionate	Calditenuis	aerobic	24 hour	0.250817
15N	propionate	Calditenuis	aerobic	24 hour	0.0290207
15N	propionate	Calditenuis	aerobic	24 hour	0.113624
15N	propionate	Calditenuis	aerobic	24 hour	0.140108
15N	propionate	Calditenuis	aerobic	24 hour	0.2964
15N	propionate	Calditenuis	aerobic	24 hour	0.240024
15N	propionate	Calditenuis	aerobic	24 hour	0.179496
15N	propionate	Calditenuis	aerobic	24 hour	0.187765
15N	propionate	Calditenuis	aerobic	24 hour	0.112714
15N	propionate	Calditenuis	aerobic	24 hour	0.225169
15N	propionate	Calditenuis	aerobic	24 hour	0.291474
15N	propionate	Calditenuis	aerobic	24 hour	0.238941
15N	propionate	Calditenuis	aerobic	24 hour	0.379501
15N	propionate	Calditenuis	aerobic	24 hour	0.0199021
15N	propionate	Calditenuis	aerobic	24 hour	0.294765
15N	propionate	Calditenuis	aerobic	24 hour	0.124704
15N	propionate	Calditenuis	aerobic	24 hour	0.265982
15N	propionate	Calditenuis	aerobic	24 hour	0.072801
15N	propionate	Calditenuis	aerobic	24 hour	0.102265
15N	propionate	Calditenuis	aerobic	24 hour	0.220653
15N	propionate	Calditenuis	aerobic	24 hour	0.295448
15N	propionate	Calditenuis	aerobic	24 hour	0.199365
15N	propionate	Calditenuis	aerobic	24 hour	0.249562
15N	propionate	Calditenuis	aerobic	24 hour	0.114191
15N	propionate	Calditenuis	aerobic	24 hour	0.191731
15N	propionate	Calditenuis	aerobic	24 hour	0.173991
15N	propionate	Calditenuis	aerobic	24 hour	0.183546
15N	propionate	Calditenuis	aerobic	24 hour	0.299987
15N	propionate	Calditenuis	aerobic	24 hour	0.32144
15N	propionate	Calditenuis	aerobic	24 hour	0.242062
15N	propionate	Calditenuis	aerobic	24 hour	0.364008
15N	propionate	Calditenuis	aerobic	24 hour	0.308636
15N	bicarbonate	Calditenuis	aerobic	24 hour	0.0592718
15N	bicarbonate	Calditenuis	aerobic	24 hour	0.00237533
15N	bicarbonate	Calditenuis	aerobic	24 hour	0.111911
15N	bicarbonate	Calditenuis	aerobic	24 hour	0.110724
15N	bicarbonate	Calditenuis	aerobic	24 hour	0.0540333
15N	bicarbonate	Calditenuis	aerobic	24 hour	0.101978
15N	bicarbonate	Calditenuis	aerobic	24 hour	0.0837622
15N	bicarbonate	Calditenuis	aerobic	24 hour	0.100839
15N	bicarbonate	Calditenuis	aerobic	24 hour	0.0969166
15N	bicarbonate	Calditenuis	aerobic	24 hour	0.0751048
15N	bicarbonate	Calditenuis	aerobic	24 hour	0.0835324
15N	bicarbonate	Calditenuis	aerobic	24 hour	0.114155
15N	bicarbonate	Calditenuis	aerobic	24 hour	0.0781572
15N	bicarbonate	Calditenuis	aerobic	24 hour	0.0910141
15N	glucose	Calditenuis	aerobic	24 hour	0.0377477
15N	glucose	Calditenuis	aerobic	24 hour	0.0478454
15N	glucose	Calditenuis	aerobic	24 hour	0.0573125
15N	glucose	Calditenuis	aerobic	24 hour	0.0543898
15N	glucose	Calditenuis	aerobic	24 hour	0.0353989
15N	glucose	Calditenuis	aerobic	24 hour	0.0567505
15N	glucose	Calditenuis	aerobic	24 hour	0.0222281
15N	glucose	Calditenuis	aerobic	24 hour	0.0476937
15N	glucose	Calditenuis	aerobic	24 hour	0.0340495
15N	glucose	Calditenuis	aerobic	24 hour	0.0367072
15N	glucose	Calditenuis	aerobic	24 hour	0.064882
15N	glucose	Calditenuis	aerobic	24 hour	0.0406641
15N	glucose	Calditenuis	aerobic	24 hour	0.0442423
15N	glucose	Calditenuis	aerobic	24 hour	0.0429272
15N	glucose	Calditenuis	aerobic	24 hour	0.0565891
15N	glucose	Calditenuis	aerobic	24 hour	0.0459306
15N	glucose	Calditenuis	aerobic	24 hour	0.0421123
15N	xylose	Calditenuis	aerobic	24 hour	0.0084892
15N	xylose	Calditenuis	aerobic	24 hour	0.0547953
15N	xylose	Calditenuis	aerobic	24 hour	0.212351
15N	xylose	Calditenuis	aerobic	24 hour	0.0257467
15N	xylose	Calditenuis	aerobic	24 hour	0.160239
15N	xylose	Calditenuis	aerobic	24 hour	0.0102482
15N	xylose	Calditenuis	aerobic	24 hour	0.193031
15N	xylose	Calditenuis	aerobic	24 hour	0.17147
15N	xylose	Calditenuis	aerobic	24 hour	0.205434
15N	ribose	Calditenuis	aerobic	24 hour	0.0590127
15N	ribose	Calditenuis	aerobic	24 hour	0.0518358
15N	ribose	Calditenuis	aerobic	24 hour	0.0773766
15N	ribose	Calditenuis	aerobic	24 hour	0.0515067
15N	ribose	Calditenuis	aerobic	24 hour	0.0593466
15N	ribose	Calditenuis	aerobic	24 hour	0.0692295
15N	ribose	Calditenuis	aerobic	24 hour	0.112904
15N	ribose	Calditenuis	aerobic	24 hour	0.0530147
15N	ribose	Calditenuis	aerobic	24 hour	0.0546284
15N	ribose	Calditenuis	aerobic	24 hour	0.0595808
15N	butyrate	Calditenuis	aerobic	24 hour	0.0397801
15N	butyrate	Calditenuis	aerobic	24 hour	0.303356
15N	butyrate	Calditenuis	aerobic	24 hour	0.16248
15N	butyrate	Calditenuis	aerobic	24 hour	0.155646
15N	butyrate	Calditenuis	aerobic	24 hour	0.198535
15N	butyrate	Calditenuis	aerobic	24 hour	0.186391
15N	butyrate	Calditenuis	aerobic	24 hour	0.145385
15N	butyrate	Calditenuis	aerobic	24 hour	0.203194
15N	butyrate	Calditenuis	aerobic	24 hour	0.146206
15N	butyrate	Calditenuis	aerobic	24 hour	0.194553
15N	butyrate	Calditenuis	aerobic	24 hour	0.265584
15N	butyrate	Calditenuis	aerobic	24 hour	0.152242
15N	butyrate	Calditenuis	aerobic	24 hour	0.173051
15N	butyrate	Calditenuis	aerobic	24 hour	0.027406
15N	butyrate	Calditenuis	aerobic	24 hour	0.0219965
15N	butyrate	Calditenuis	aerobic	24 hour	0.243011
15N	butyrate	Calditenuis	aerobic	24 hour	0.234624
15N	butyrate	Calditenuis	aerobic	24 hour	0.13611
15N	butyrate	Calditenuis	aerobic	24 hour	0.143357
15N	butyrate	Calditenuis	aerobic	24 hour	0.176881
15N	butyrate	Calditenuis	aerobic	24 hour	0.163057
15N	butyrate	Calditenuis	aerobic	24 hour	0.216527
15N	butyrate	Calditenuis	aerobic	24 hour	0.250773
15N	Control	Calditenuis	aerobic	-	0.0167337
15N	Control	Calditenuis	aerobic	-	0.00620565
15N	Control	Calditenuis	aerobic	-	0.00930024
15N	Control	Calditenuis	aerobic	-	-0.0201355
15N	Control	Calditenuis	aerobic	-	0.0125285
15N	amino acids	Other	aerobic	24 hour	0.271085
15N	amino acids	Other	aerobic	24 hour	0.297285
15N	amino acids	Other	aerobic	24 hour	0.396631
15N	amino acids	Other	aerobic	24 hour	0.018681
15N	amino acids	Other	aerobic	24 hour	0.404634
15N	amino acids	Other	aerobic	24 hour	0.390725
15N	amino acids	Other	aerobic	24 hour	0.473345
15N	amino acids	Other	aerobic	24 hour	0.578645
15N	amino acids	Other	aerobic	24 hour	0.322689
15N	amino acids	Other	aerobic	24 hour	0.542301
15N	amino acids	Other	aerobic	24 hour	0.346392
15N	amino acids	Other	aerobic	24 hour	0.45211
15N	formate	Other	aerobic	24 hour	0.176753
15N	formate	Other	aerobic	24 hour	0.129297
15N	formate	Other	aerobic	24 hour	0.100591
15N	formate	Other	aerobic	24 hour	0.0834446
15N	formate	Other	aerobic	24 hour	0.0301414
15N	formate	Other	aerobic	24 hour	0.0249259
15N	formate	Other	aerobic	24 hour	0.0218443
15N	formate	Other	aerobic	24 hour	0.183707
15N	formate	Other	aerobic	24 hour	0.302854
15N	formate	Other	aerobic	24 hour	0.0295077
15N	formate	Other	aerobic	24 hour	0.215919
15N	formate	Other	aerobic	24 hour	0.0749195
15N	formate	Other	aerobic	24 hour	0.153407
15N	formate	Other	aerobic	24 hour	0.12212
15N	formate	Other	aerobic	24 hour	0.0539779
15N	acetate	Other	aerobic	24 hour	0.13916
15N	acetate	Other	aerobic	24 hour	0.055421
15N	acetate	Other	aerobic	24 hour	0.107165
15N	acetate	Other	aerobic	24 hour	0.101642
15N	acetate	Other	aerobic	24 hour	0.155927
15N	acetate	Other	aerobic	24 hour	0.093337
15N	acetate	Other	aerobic	24 hour	0.260458
15N	acetate	Other	aerobic	24 hour	0.172341
15N	propionate	Other	aerobic	24 hour	0.0973673
15N	propionate	Other	aerobic	24 hour	0.255551
15N	propionate	Other	aerobic	24 hour	0.382498
15N	propionate	Other	aerobic	24 hour	0.579932
15N	propionate	Other	aerobic	24 hour	0.178469
15N	propionate	Other	aerobic	24 hour	0.406356
15N	propionate	Other	aerobic	24 hour	0.123243
15N	propionate	Other	aerobic	24 hour	0.0884589
15N	propionate	Other	aerobic	24 hour	0.0341941
15N	propionate	Other	aerobic	24 hour	0.166737
15N	propionate	Other	aerobic	24 hour	0.213973
15N	propionate	Other	aerobic	24 hour	0.304014
15N	propionate	Other	aerobic	24 hour	0.557014
15N	propionate	Other	aerobic	24 hour	0.202941
15N	bicarbonate	Other	aerobic	24 hour	0.102706
15N	bicarbonate	Other	aerobic	24 hour	0.0124454
15N	bicarbonate	Other	aerobic	24 hour	0.0900313
15N	bicarbonate	Other	aerobic	24 hour	0.082715
15N	bicarbonate	Other	aerobic	24 hour	0.0246277
15N	bicarbonate	Other	aerobic	24 hour	0.00169563
15N	bicarbonate	Other	aerobic	24 hour	0.0646469
15N	bicarbonate	Other	aerobic	24 hour	0.13897
15N	bicarbonate	Other	aerobic	24 hour	0.0701021
15N	bicarbonate	Other	aerobic	24 hour	0.00299458
15N	bicarbonate	Other	aerobic	24 hour	0.073353
15N	glucose	Other	aerobic	24 hour	0.0144032
15N	glucose	Other	aerobic	24 hour	0.066918
15N	glucose	Other	aerobic	24 hour	0.0550683
15N	glucose	Other	aerobic	24 hour	0.0273126
15N	glucose	Other	aerobic	24 hour	0.0348665
15N	glucose	Other	aerobic	24 hour	0.01401
15N	glucose	Other	aerobic	24 hour	0.0444797
15N	glucose	Other	aerobic	24 hour	0.0502659
15N	glucose	Other	aerobic	24 hour	0.0685925
15N	glucose	Other	aerobic	24 hour	0.0557566
15N	glucose	Other	aerobic	24 hour	0.0576575
15N	glucose	Other	aerobic	24 hour	0.0536881
15N	glucose	Other	aerobic	24 hour	0.0596919
15N	glucose	Other	aerobic	24 hour	0.063769
15N	glucose	Other	aerobic	24 hour	0.0294258
15N	glucose	Other	aerobic	24 hour	0.0484784
15N	glucose	Other	aerobic	24 hour	0.0688546
15N	glucose	Other	aerobic	24 hour	0.0517484
15N	xylose	Other	aerobic	24 hour	0.115656
15N	xylose	Other	aerobic	24 hour	0.0397047
15N	xylose	Other	aerobic	24 hour	0.0111939
15N	xylose	Other	aerobic	24 hour	0.00349857
15N	xylose	Other	aerobic	24 hour	0.218363
15N	ribose	Other	aerobic	24 hour	0.0557544
15N	ribose	Other	aerobic	24 hour	-0.0253976
15N	ribose	Other	aerobic	24 hour	0.0667239
15N	ribose	Other	aerobic	24 hour	0.0620289
15N	ribose	Other	aerobic	24 hour	0.0565541
15N	ribose	Other	aerobic	24 hour	-0.0484044
15N	ribose	Other	aerobic	24 hour	0.0578973
15N	ribose	Other	aerobic	24 hour	0.0610583
15N	ribose	Other	aerobic	24 hour	0.0692701
15N	ribose	Other	aerobic	24 hour	0.0115568
15N	ribose	Other	aerobic	24 hour	-0.13167
15N	ribose	Other	aerobic	24 hour	0.0633371
15N	ribose	Other	aerobic	24 hour	0.051327
15N	ribose	Other	aerobic	24 hour	-0.0226562
15N	ribose	Other	aerobic	24 hour	-0.000414255
15N	ribose	Other	aerobic	24 hour	0.0694783
15N	ribose	Other	aerobic	24 hour	0.0853159
15N	butyrate	Other	aerobic	24 hour	0.00838327
15N	butyrate	Other	aerobic	24 hour	0.0336938
15N	butyrate	Other	aerobic	24 hour	0.162011
15N	butyrate	Other	aerobic	24 hour	0.15963
15N	butyrate	Other	aerobic	24 hour	0.184206
15N	butyrate	Other	aerobic	24 hour	0.126041
15N	butyrate	Other	aerobic	24 hour	0.255322
15N	butyrate	Other	aerobic	24 hour	0.219929
15N	butyrate	Other	aerobic	24 hour	0.227778
15N	butyrate	Other	aerobic	24 hour	0.309004
15N	butyrate	Other	aerobic	24 hour	0.0188761
15N	butyrate	Other	aerobic	24 hour	0.212154
15N	butyrate	Other	aerobic	24 hour	0.169495
15N	butyrate	Other	aerobic	24 hour	0.201909
15N	butyrate	Other	aerobic	24 hour	0.290366
15N	butyrate	Other	aerobic	24 hour	0.347181
15N	butyrate	Other	aerobic	24 hour	0.305649
15N	butyrate	Other	aerobic	24 hour	0.144671
15N	butyrate	Other	aerobic	24 hour	0.187496
15N	butyrate	Other	aerobic	24 hour	0.018938
15N	butyrate	Other	aerobic	24 hour	0.0110155
15N	butyrate	Other	aerobic	24 hour	0.0205371
15N	butyrate	Other	aerobic	24 hour	0.248336
15N	butyrate	Other	aerobic	24 hour	0.0074841
15N	butyrate	Other	aerobic	24 hour	0.0315876
15N	butyrate	Other	aerobic	24 hour	0.0318563
15N	butyrate	Other	aerobic	24 hour	0.0244217
15N	butyrate	Other	aerobic	24 hour	0.0682762
15N	butyrate	Other	aerobic	24 hour	0.0466495
15N	butyrate	Other	aerobic	24 hour	0.090318
15N	butyrate	Other	aerobic	24 hour	0.0569369
15N	butyrate	Other	aerobic	24 hour	-0.0155174
15N	butyrate	Other	aerobic	24 hour	0.0460359
15N	butyrate	Other	aerobic	24 hour	0.0380487
15N	butyrate	Other	aerobic	24 hour	0.0473658
15N	butyrate	Other	aerobic	24 hour	0.0171235
15N	butyrate	Other	aerobic	24 hour	0.0231609
15N	butyrate	Other	aerobic	24 hour	0.0446778
15N	butyrate	Other	aerobic	24 hour	0.0322266
15N	butyrate	Other	aerobic	24 hour	0.0137548
15N	butyrate	Other	aerobic	24 hour	0.0244177
15N	butyrate	Other	aerobic	24 hour	0.0123452
15N	butyrate	Other	aerobic	24 hour	0.00766214
15N	butyrate	Other	aerobic	24 hour	-0.0204856
15N	butyrate	Other	aerobic	24 hour	0.042714
15N	butyrate	Other	aerobic	24 hour	0.0700602
15N	butyrate	Other	aerobic	24 hour	0.0983187
15N	butyrate	Other	aerobic	24 hour	0.0241913
15N	butyrate	Other	aerobic	24 hour	0.011879
15N	butyrate	Other	aerobic	24 hour	0.063779
15N	butyrate	Other	aerobic	24 hour	0.0339207
15N	butyrate	Other	aerobic	24 hour	0.036969
15N	butyrate	Other	aerobic	24 hour	0.0103164
15N	butyrate	Other	aerobic	24 hour	0.046035
15N	butyrate	Other	aerobic	24 hour	0.156778
15N	butyrate	Other	aerobic	24 hour	0.0266102
15N	butyrate	Other	aerobic	24 hour	0.015046
15N	butyrate	Other	aerobic	24 hour	0.0280532
15N	butyrate	Other	aerobic	24 hour	0.061219
15N	butyrate	Other	aerobic	24 hour	0.0221198
15N	butyrate	Other	aerobic	24 hour	0.0562863
15N	butyrate	Other	aerobic	24 hour	0.0198258
15N	butyrate	Other	aerobic	24 hour	0.00985178
15N	butyrate	Other	aerobic	24 hour	0.0179961
15N	butyrate	Other	aerobic	24 hour	0.00407778
15N	butyrate	Other	aerobic	24 hour	0.187584
15N	butyrate	Other	aerobic	24 hour	0.0411184
15N	butyrate	Other	aerobic	24 hour	0.0218415
15N	butyrate	Other	aerobic	24 hour	0.0461394
15N	butyrate	Other	aerobic	24 hour	0.0253138
15N	butyrate	Other	aerobic	24 hour	0.0725587
15N	butyrate	Other	aerobic	24 hour	0.0127398
15N	butyrate	Other	aerobic	24 hour	0.0540501
15N	butyrate	Other	aerobic	24 hour	0.0526333
15N	butyrate	Other	aerobic	24 hour	0.489233
15N	butyrate	Other	aerobic	24 hour	0.107013
15N	butyrate	Other	aerobic	24 hour	0.240322
15N	butyrate	Other	aerobic	24 hour	0.0210668
15N	butyrate	Other	aerobic	24 hour	0.0172774
15N	butyrate	Other	aerobic	24 hour	0.00717848
15N	butyrate	Other	aerobic	24 hour	0.1733
15N	Control	Other	aerobic	-	0.0204351
15N	Control	Other	aerobic	-	0.0260769
15N	Control	Other	aerobic	-	0.00445214
15N	Control	Other	aerobic	-	0.0135118

## Sheet: Supplementary Table 7
Supplementary Table 7. The presence and position of each BCAAs transporter protein domain in Calditenuis ramacidaminiphagus LZTs (predicted using hmmscan v3.3 with default parameters）
query name	Contig	KOs	Eggnog annotation	description of target	qlen	target name	accession	tlen	Full seq E	full seq score	bias	#domain	total number of domains	c-Evalue	i-Evalue	Domain score	bias	from (hmm coord)	to (hmm coord)	from (ali coord)	to (ali coord)	from (env coord)	to (env coord)	acc	description of target
NODE_15_length_162319_cov_24.491263_10	NODE_15_length_162319	K01998	Branched-chain amino acid transport system / permease component	Branched-chain amino acid transport system / permease component	312	BPD_transp_2	PF02653.20	269	2.3e-36	125.5	37.6	1	2	0.37	7700	-4.1	0.4	137	147	12	22	4	25	0.51	Branched-chain amino acid transport system / permease component
NODE_15_length_162319_cov_24.491263_10	NODE_15_length_162319	K01998	Branched-chain amino acid transport system / permease component	Branched-chain amino acid transport system / permease component	312	BPD_transp_2	PF02653.20	269	2.3e-36	125.5	37.6	2	2	1.1e-40	2.3e-36	125.5	37.6	2	269	29	292	28	292	0.97	Branched-chain amino acid transport system / permease component
NODE_15_length_162319_cov_24.491263_11	NODE_15_length_162319	K01997	Branched-chain amino acid transport system / permease component	Branched-chain amino acid transport system / permease component	287	BPD_transp_2	PF02653.20	269	1.2e-37	129.8	40.2	1	1	1.3e-41	1.4e-37	129.5	40.2	2	269	9	275	8	275	0.89	Branched-chain amino acid transport system / permease component
NODE_15_length_162319_cov_24.491263_11	NODE_15_length_162319	K01997	Branched-chain amino acid transport system / permease component	NADH-ubiquinone reductase complex 1 MLRQ subunit	287	B12D	PF06522.15	69	0.035	14.1	0.6	1	2	0.36	3700	-2	0.1	9	26	65	82	65	86	0.71	NADH-ubiquinone reductase complex 1 MLRQ subunit
NODE_15_length_162319_cov_24.491263_11	NODE_15_length_162319	K01997	Branched-chain amino acid transport system / permease component	NADH-ubiquinone reductase complex 1 MLRQ subunit	287	B12D	PF06522.15	69	0.035	14.1	0.6	2	2	3.3e-06	0.035	14.1	0.6	6	28	138	160	136	163	0.92	NADH-ubiquinone reductase complex 1 MLRQ subunit
NODE_51_length_80973_cov_20.400477_28	NODE_51_length_80973	K01999	ABC-type branched-chain amino acid transport	Periplasmic binding protein	417	Peripla_BP_6	PF13458.10	343	3.9e-65	221	0.2	1	1	9.2e-69	4.8e-65	220.7	0.2	2	328	36	377	35	391	0.89	Periplasmic binding protein
NODE_69_length_66645_cov_22.017785_28	NODE_69_length_66645	K01999	Periplasmic binding protein domain	Periplasmic binding protein	442	Peripla_BP_6	PF13458.10	343	3.1e-61	208.1	0.1	1	1	5.5e-65	3.8e-61	207.9	0.1	1	333	53	399	53	407	0.87	Periplasmic binding protein
NODE_19_length_137834_cov_22.950344_119	NODE_19_length_137834	K01999	Periplasmic binding protein	Periplasmic binding protein	427	Peripla_BP_6	PF13458.10	343	1.2e-56	193.1	0.2	1	1	3.4e-60	1.4e-56	192.8	0.2	2	342	42	407	41	408	0.89	Periplasmic binding protein
NODE_15_length_162319_cov_24.491263_12	NODE_15_length_162319	K01999	Receptor family ligand binding region	Periplasmic binding protein	381	Peripla_BP_6	PF13458.10	343	3.6e-56	191.5	0.3	1	1	8.2e-60	4.3e-56	191.3	0.3	1	333	5	347	5	357	0.87	Periplasmic binding protein
NODE_34_length_102507_cov_23.483092_81	NODE_34_length_102507	K01999	PFAM Extracellular ligand-binding receptor	Periplasmic binding protein	431	Peripla_BP_6	PF13458.10	343	1.1e-55	189.9	0	1	1	1.9e-59	1.3e-55	189.6	0	1	343	37	411	37	411	0.89	Periplasmic binding protein
NODE_15_length_162319_cov_24.491263_9	NODE_15_length_162319	K01995	abc transporter	ABC transporter	232	ABC_tran	PF00005.31	137	2.4e-29	102.9	0	1	1	4.2e-32	3.4e-29	102.5	0	2	137	22	162	21	162	0.95	ABC transporter
NODE_15_length_162319_cov_24.491263_9	NODE_15_length_162319	K01995	abc transporter	AAA domain, putative AbiEii toxin, Type IV TA system	232	AAA_21	PF13304.10	304	8.5e-10	39.2	1.9	1	2	6.2e-07	0.00049	20.3	0.6	3	40	35	66	33	73	0.83	AAA domain, putative AbiEii toxin, Type IV TA system
NODE_15_length_162319_cov_24.491263_9	NODE_15_length_162319	K01995	abc transporter	AAA domain, putative AbiEii toxin, Type IV TA system	232	AAA_21	PF13304.10	304	8.5e-10	39.2	1.9	2	2	2.2e-06	0.0017	18.5	0	228	293	124	185	77	195	0.84	AAA domain, putative AbiEii toxin, Type IV TA system
NODE_15_length_162319_cov_24.491263_9	NODE_15_length_162319	K01995	abc transporter	Branched-chain amino acid ATP-binding cassette transporter	232	BCA_ABC_TP_C	PF12399.12	27	3.4e-07	29.9	0.7	1	1	6.4e-10	5.1e-07	29.4	0.7	1	23	209	231	209	231	0.98	Branched-chain amino acid ATP-binding cassette transporter
NODE_15_length_162319_cov_24.491263_9	NODE_15_length_162319	K01995	abc transporter	RecF/RecN/SMC N terminal domain	232	SMC_N	PF02463.23	220	6.1e-05	22.7	1.7	1	3	0.00026	0.2	11.2	0.2	16	44	22	51	7	69	0.73	RecF/RecN/SMC N terminal domain
NODE_15_length_162319_cov_24.491263_9	NODE_15_length_162319	K01995	abc transporter	RecF/RecN/SMC N terminal domain	232	SMC_N	PF02463.23	220	6.1e-05	22.7	1.7	2	3	2.9	2400	-2.1	0	32	60	105	133	86	137	0.78	RecF/RecN/SMC N terminal domain
NODE_15_length_162319_cov_24.491263_9	NODE_15_length_162319	K01995	abc transporter	RecF/RecN/SMC N terminal domain	232	SMC_N	PF02463.23	220	6.1e-05	22.7	1.7	3	3	0.00053	0.43	10.2	0.1	149	197	142	190	137	205	0.88	RecF/RecN/SMC N terminal domain
NODE_15_length_162319_cov_24.491263_9	NODE_15_length_162319	K01995	abc transporter	P-loop containing region of AAA domain	232	AAA_29	PF13555.10	61	0.0011	18.9	0.5	1	1	2.8e-06	0.0022	17.9	0.1	14	50	23	59	15	67	0.77	P-loop containing region of AAA domain
NODE_15_length_162319_cov_24.491263_9	NODE_15_length_162319	K01995	abc transporter	Double-GTPase 2	232	DO-GTPase2	PF19993.3	227	0.0014	18.6	0.2	1	2	0.00011	0.087	12.7	0.1	2	20	33	51	32	70	0.84	Double-GTPase 2
NODE_15_length_162319_cov_24.491263_9	NODE_15_length_162319	K01995	abc transporter	Double-GTPase 2	232	DO-GTPase2	PF19993.3	227	0.0014	18.6	0.2	2	2	0.044	35	4.2	0	78	171	103	192	94	220	0.68	Double-GTPase 2
NODE_15_length_162319_cov_24.491263_9	NODE_15_length_162319	K01995	abc transporter	AAA domain	232	AAA_22	PF13401.10	130	0.0022	18.5	0	1	1	5.3e-06	0.0042	17.6	0	10	109	36	181	31	200	0.62	AAA domain
NODE_15_length_162319_cov_24.491263_9	NODE_15_length_162319	K01995	abc transporter	AAA domain	232	AAA_23	PF13476.10	201	0.0024	18.7	0.1	1	1	5.2e-06	0.0041	17.9	0.1	11	39	22	51	11	60	0.74	AAA domain
NODE_15_length_162319_cov_24.491263_9	NODE_15_length_162319	K01995	abc transporter	AAA domain	232	AAA_30	PF13604.10	191	0.0032	17.4	0	1	1	1.5e-05	0.012	15.5	0	22	120	35	186	24	191	0.65	AAA domain
NODE_15_length_162319_cov_24.491263_9	NODE_15_length_162319	K01995	abc transporter	50S ribosome-binding GTPase	232	MMR_HSR1	PF01926.27	113	0.0037	17.5	0.1	1	2	2.5e-05	0.02	15.2	0	1	29	33	62	33	79	0.82	50S ribosome-binding GTPase
NODE_15_length_162319_cov_24.491263_9	NODE_15_length_162319	K01995	abc transporter	50S ribosome-binding GTPase	232	MMR_HSR1	PF01926.27	113	0.0037	17.5	0.1	2	2	1.4	1100	-0.1	0	76	105	150	182	123	191	0.57	50S ribosome-binding GTPase
NODE_15_length_162319_cov_24.491263_9	NODE_15_length_162319	K01995	abc transporter	ATPase family associated with various cellular activities (AAA)	232	AAA	PF00004.33	131	0.011	16.4	0.2	1	1	3e-05	0.024	15.3	0.2	3	36	36	71	34	188	0.83	ATPase family associated with various cellular activities (AAA)
NODE_15_length_162319_cov_24.491263_9	NODE_15_length_162319	K01995	abc transporter	RsgA GTPase	232	RsgA_GTPase	PF03193.20	174	0.013	15.6	0.3	1	2	3e-05	0.024	14.6	0.1	106	135	31	60	17	67	0.83	RsgA GTPase
NODE_15_length_162319_cov_24.491263_9	NODE_15_length_162319	K01995	abc transporter	RsgA GTPase	232	RsgA_GTPase	PF03193.20	174	0.013	15.6	0.3	2	2	9.6	7700	-3.3	0	90	111	165	186	158	188	0.71	RsgA GTPase
NODE_15_length_162319_cov_24.491263_9	NODE_15_length_162319	K01995	abc transporter	AAA domain	232	AAA_19	PF13245.10	135	0.019	15.3	0.5	1	1	6.5e-05	0.052	13.9	0.5	14	124	34	188	27	198	0.69	AAA domain
NODE_15_length_162319_cov_24.491263_9	NODE_15_length_162319	K01995	abc transporter	SRP54-type protein, GTPase domain	232	SRP54	PF00448.26	196	0.024	14.5	0.1	1	2	0.0002	0.16	11.8	0	6	41	36	71	32	121	0.83	SRP54-type protein, GTPase domain
NODE_15_length_162319_cov_24.491263_9	NODE_15_length_162319	K01995	abc transporter	SRP54-type protein, GTPase domain	232	SRP54	PF00448.26	196	0.024	14.5	0.1	2	2	0.55	440	0.6	0	70	107	140	177	97	190	0.65	SRP54-type protein, GTPase domain
NODE_15_length_162319_cov_24.491263_9	NODE_15_length_162319	K01995	abc transporter	AAA domain	232	AAA_27	PF13514.10	207	0.033	14	0.1	1	1	6.9e-05	0.055	13.2	0.1	8	46	12	51	7	55	0.79	AAA domain
NODE_15_length_162319_cov_24.491263_9	NODE_15_length_162319	K01995	abc transporter	Novel STAND NTPase 3	232	nSTAND3	PF20720.1	155	0.035	14	0.1	1	2	0.0016	1.3	8.9	0	21	44	35	58	28	77	0.75	Novel STAND NTPase 3
NODE_15_length_162319_cov_24.491263_9	NODE_15_length_162319	K01995	abc transporter	Novel STAND NTPase 3	232	nSTAND3	PF20720.1	155	0.035	14	0.1	2	2	0.12	94	2.9	0	15	55	149	193	139	200	0.86	Novel STAND NTPase 3
NODE_15_length_162319_cov_24.491263_9	NODE_15_length_162319	K01995	abc transporter	AAA ATPase domain	232	AAA_16	PF13191.10	167	0.044	14.5	0	1	1	7.1e-05	0.057	14.1	0	24	53	31	60	24	187	0.77	AAA ATPase domain
NODE_15_length_162319_cov_24.491263_9	NODE_15_length_162319	K01995	abc transporter	KAP family P-loop domain	232	KAP_NTPase	PF07693.18	293	0.071	12.5	0	1	1	0.00012	0.093	12.2	0	19	53	30	64	18	193	0.77	KAP family P-loop domain
NODE_15_length_162319_cov_24.491263_9	NODE_15_length_162319	K01995	abc transporter	gag-polypeptide of LTR copia-type	232	Retrotran_gag_2	PF14223.10	138	0.072	13	0	1	1	0.00017	0.14	12.1	0	84	109	162	187	160	193	0.88	gag-polypeptide of LTR copia-type
NODE_15_length_162319_cov_24.491263_9	NODE_15_length_162319	K01995	abc transporter	ATP synthase alpha/beta family, nucleotide-binding domain	232	ATP-synt_ab	PF00006.29	213	0.075	12.9	0	1	1	0.00018	0.14	12	0	9	38	26	55	20	67	0.84	ATP synthase alpha/beta family, nucleotide-binding domain
NODE_15_length_162319_cov_24.491263_9	NODE_15_length_162319	K01995	abc transporter	AAA domain	232	AAA_28	PF13521.10	164	0.08	13.4	0.1	1	2	0.00023	0.18	12.2	0	1	22	33	54	33	63	0.87	AAA domain
NODE_15_length_162319_cov_24.491263_9	NODE_15_length_162319	K01995	abc transporter	AAA domain	232	AAA_28	PF13521.10	164	0.08	13.4	0.1	2	2	6.7	5400	-2.3	0	104	104	186	186	141	229	0.61	AAA domain
NODE_15_length_162319_cov_24.491263_9	NODE_15_length_162319	K01995	abc transporter	AAA ATPase domain	232	AAA_15	PF13175.10	399	0.098	12.4	0.1	1	1	0.00026	0.21	11.3	0	27	48	35	56	14	108	0.75	AAA ATPase domain
NODE_15_length_162319_cov_24.491263_9	NODE_15_length_162319	K01995	abc transporter	Bacterial TniB protein	232	TniB	PF05621.15	189	0.18	11.4	0.4	1	2	0.2	160	1.8	0	38	54	34	50	26	63	0.81	Bacterial TniB protein
NODE_15_length_162319_cov_24.491263_9	NODE_15_length_162319	K01995	abc transporter	Bacterial TniB protein	232	TniB	PF05621.15	189	0.18	11.4	0.4	2	2	0.0034	2.7	7.6	0.1	116	158	148	188	100	196	0.75	Bacterial TniB protein
NODE_15_length_162319_cov_24.491263_9	NODE_15_length_162319	K01995	abc transporter	AAA domain	232	AAA_13	PF13166.10	714	0.19	10.5	0	1	1	0.00028	0.22	10.3	0	20	41	36	56	15	100	0.76	AAA domain
NODE_15_length_162319_cov_24.491263_9	NODE_15_length_162319	K01995	abc transporter	Zeta toxin	232	Zeta_toxin	PF06414.16	199	0.19	11.3	0	1	1	0.00037	0.29	10.7	0	23	63	38	78	33	94	0.86	Zeta toxin
NODE_15_length_162319_cov_24.491263_9	NODE_15_length_162319	K01995	abc transporter	AAA domain	232	AAA_24	PF13479.10	195	0.24	11.4	0.2	1	2	0.00085	0.68	9.9	0	4	22	33	51	30	64	0.84	AAA domain
NODE_15_length_162319_cov_24.491263_9	NODE_15_length_162319	K01995	abc transporter	AAA domain	232	AAA_24	PF13479.10	195	0.24	11.4	0.2	2	2	2.8	2300	-1.6	0	108	129	167	190	163	196	0.79	AAA domain
NODE_19_length_137834_cov_22.950344_114	NODE_19_length_137834	K01998,K11955	Branched-chain amino acid transport system, permease component	Branched-chain amino acid transport system / permease component	349	BPD_transp_2	PF02653.20	269	2.3e-36	125.5	31.1	1	1	1.4e-40	3e-36	125.1	31.1	3	252	47	295	45	322	0.82	Branched-chain amino acid transport system / permease component
NODE_19_length_137834_cov_22.950344_115	NODE_19_length_137834	K01997	Branched-chain amino acid transport system / permease component	Branched-chain amino acid transport system / permease component	299	BPD_transp_2	PF02653.20	269	1.4e-28	100	44.7	1	1	8e-33	1.7e-28	99.7	44.7	2	269	11	282	10	282	0.86	Branched-chain amino acid transport system / permease component
NODE_19_length_137834_cov_22.950344_117	NODE_19_length_137834	K01995	PFAM ABC transporter related	ABC transporter	259	ABC_tran	PF00005.31	137	8.3e-33	114.1	0	1	1	8.6e-36	1.1e-32	113.7	0	1	136	21	184	21	185	0.95	ABC transporter
NODE_19_length_137834_cov_22.950344_117	NODE_19_length_137834	K01995	PFAM ABC transporter related	AAA domain, putative AbiEii toxin, Type IV TA system	259	AAA_21	PF13304.10	304	2.4e-06	27.9	0.3	1	2	2.8e-07	0.00036	20.8	0	3	24	35	56	33	87	0.8	AAA domain, putative AbiEii toxin, Type IV TA system
NODE_19_length_137834_cov_22.950344_117	NODE_19_length_137834	K01995	PFAM ABC transporter related	AAA domain, putative AbiEii toxin, Type IV TA system	259	AAA_21	PF13304.10	304	2.4e-06	27.9	0.3	2	2	0.011	14	5.6	0.1	251	296	170	213	126	221	0.78	AAA domain, putative AbiEii toxin, Type IV TA system
NODE_19_length_137834_cov_22.950344_117	NODE_19_length_137834	K01995	PFAM ABC transporter related	Branched-chain amino acid ATP-binding cassette transporter	259	BCA_ABC_TP_C	PF12399.12	27	0.0001	22	2.7	1	2	1.8	2300	-1.5	0.1	17	21	101	105	99	105	0.89	Branched-chain amino acid ATP-binding cassette transporter
NODE_19_length_137834_cov_22.950344_117	NODE_19_length_137834	K01995	PFAM ABC transporter related	Branched-chain amino acid ATP-binding cassette transporter	259	BCA_ABC_TP_C	PF12399.12	27	0.0001	22	2.7	2	2	8e-08	0.0001	22	2.7	2	25	235	258	234	258	0.96	Branched-chain amino acid ATP-binding cassette transporter
NODE_19_length_137834_cov_22.950344_117	NODE_19_length_137834	K01995	PFAM ABC transporter related	AAA domain	259	AAA_23	PF13476.10	201	0.00014	22.7	0.8	1	1	1.9e-07	0.00024	22	0.8	20	40	32	52	12	54	0.82	AAA domain
NODE_19_length_137834_cov_22.950344_117	NODE_19_length_137834	K01995	PFAM ABC transporter related	AAA domain	259	AAA_27	PF13514.10	207	0.0039	17	0	1	1	4.5e-06	0.0059	16.4	0	4	47	9	52	6	55	0.85	AAA domain
NODE_19_length_137834_cov_22.950344_117	NODE_19_length_137834	K01995	PFAM ABC transporter related	RecF/RecN/SMC N terminal domain	259	SMC_N	PF02463.23	220	0.0043	16.7	0.2	1	1	5.3e-06	0.0069	16	0.2	24	44	31	51	9	63	0.83	RecF/RecN/SMC N terminal domain
NODE_19_length_137834_cov_22.950344_117	NODE_19_length_137834	K01995	PFAM ABC transporter related	Novel STAND NTPase 1	259	nSTAND1	PF20703.1	380	0.005	16.7	0	1	1	5.7e-06	0.0074	16.2	0	15	51	13	49	4	53	0.9	Novel STAND NTPase 1
NODE_19_length_137834_cov_22.950344_117	NODE_19_length_137834	K01995	PFAM ABC transporter related	P-loop domain	259	ABC_ATPase	PF09818.13	283	0.0083	15.4	0.3	1	2	0.00077	1	8.5	0	75	141	26	93	9	103	0.74	P-loop domain
NODE_19_length_137834_cov_22.950344_117	NODE_19_length_137834	K01995	PFAM ABC transporter related	P-loop domain	259	ABC_ATPase	PF09818.13	283	0.0083	15.4	0.3	2	2	0.0098	13	4.9	0.1	192	248	179	232	166	237	0.83	P-loop domain
NODE_19_length_137834_cov_22.950344_117	NODE_19_length_137834	K01995	PFAM ABC transporter related	AAA domain	259	AAA_22	PF13401.10	130	0.0094	16.5	0.1	1	2	0.00011	0.14	12.7	0	6	30	32	56	28	117	0.75	AAA domain
NODE_19_length_137834_cov_22.950344_117	NODE_19_length_137834	K01995	PFAM ABC transporter related	AAA domain	259	AAA_22	PF13401.10	130	0.0094	16.5	0.1	2	2	0.29	380	1.6	0.1	81	121	170	213	145	217	0.74	AAA domain
NODE_19_length_137834_cov_22.950344_117	NODE_19_length_137834	K01995	PFAM ABC transporter related	AAA ATPase domain	259	AAA_15	PF13175.10	399	0.011	15.5	0	1	1	1.1e-05	0.014	15.2	0	23	50	32	58	20	109	0.81	AAA ATPase domain
NODE_19_length_137834_cov_22.950344_117	NODE_19_length_137834	K01995	PFAM ABC transporter related	AAA ATPase domain	259	AAA_16	PF13191.10	167	0.014	16.1	0	1	1	1.3e-05	0.017	15.8	0	19	56	28	63	17	182	0.8	AAA ATPase domain
NODE_19_length_137834_cov_22.950344_117	NODE_19_length_137834	K01995	PFAM ABC transporter related	P-loop containing region of AAA domain	259	AAA_29	PF13555.10	61	0.014	15.4	0	1	1	2e-05	0.026	14.5	0	15	42	24	51	18	61	0.81	P-loop containing region of AAA domain
NODE_19_length_137834_cov_22.950344_117	NODE_19_length_137834	K01995	PFAM ABC transporter related	RsgA GTPase	259	RsgA_GTPase	PF03193.20	174	0.049	13.6	0.1	1	1	7.3e-05	0.095	12.7	0.1	96	128	20	53	3	70	0.76	RsgA GTPase
NODE_19_length_137834_cov_22.950344_117	NODE_19_length_137834	K01995	PFAM ABC transporter related	Double-GTPase 2	259	DO-GTPase2	PF19993.3	227	0.08	12.8	0	1	1	0.0001	0.13	12.1	0	2	19	33	50	32	56	0.9	Double-GTPase 2
NODE_19_length_137834_cov_22.950344_117	NODE_19_length_137834	K01995	PFAM ABC transporter related	50S ribosome-binding GTPase	259	MMR_HSR1	PF01926.27	113	0.16	12.3	0.1	1	2	0.00044	0.57	10.5	0	2	38	34	71	33	92	0.78	50S ribosome-binding GTPase
NODE_19_length_137834_cov_22.950344_117	NODE_19_length_137834	K01995	PFAM ABC transporter related	50S ribosome-binding GTPase	259	MMR_HSR1	PF01926.27	113	0.16	12.3	0.1	2	2	2.6	3400	-1.7	0	75	90	192	209	181	231	0.59	50S ribosome-binding GTPase
NODE_19_length_137834_cov_22.950344_117	NODE_19_length_137834	K01995	PFAM ABC transporter related	AAA-like domain	259	AAA_35	PF14516.10	331	0.19	10.6	0	1	1	0.00026	0.34	9.8	0	28	52	28	52	19	69	0.84	AAA-like domain
NODE_19_length_137834_cov_22.950344_118	NODE_19_length_137834	K01996	ABC transporter	ABC transporter	265	ABC_tran	PF00005.31	137	1.5e-29	103.6	0.1	1	2	2.5e-32	3.4e-29	102.4	0	1	136	20	170	20	171	0.88	ABC transporter
NODE_19_length_137834_cov_22.950344_118	NODE_19_length_137834	K01996	ABC transporter	ABC transporter	265	ABC_tran	PF00005.31	137	1.5e-29	103.6	0.1	2	2	4	5500	-1.9	0	34	51	188	205	179	249	0.47	ABC transporter
NODE_19_length_137834_cov_22.950344_118	NODE_19_length_137834	K01996	ABC transporter	AAA domain, putative AbiEii toxin, Type IV TA system	265	AAA_21	PF13304.10	304	6.1e-12	46.3	0.6	1	2	1.8e-07	0.00025	21.3	0.1	1	29	32	61	32	105	0.68	AAA domain, putative AbiEii toxin, Type IV TA system
NODE_19_length_137834_cov_22.950344_118	NODE_19_length_137834	K01996	ABC transporter	AAA domain, putative AbiEii toxin, Type IV TA system	265	AAA_21	PF13304.10	304	6.1e-12	46.3	0.6	2	2	3e-08	4.1e-05	23.8	0.1	190	295	106	198	93	199	0.69	AAA domain, putative AbiEii toxin, Type IV TA system
NODE_19_length_137834_cov_22.950344_118	NODE_19_length_137834	K01996	ABC transporter	RecF/RecN/SMC N terminal domain	265	SMC_N	PF02463.23	220	2.3e-05	24.1	0.1	1	1	6.1e-08	8.5e-05	22.3	0.1	25	212	31	214	17	222	0.71	RecF/RecN/SMC N terminal domain
NODE_19_length_137834_cov_22.950344_118	NODE_19_length_137834	K01996	ABC transporter	P-loop domain	265	ABC_ATPase	PF09818.13	283	2.6e-05	23.6	0.3	1	2	0.0014	1.9	7.6	0.1	72	100	20	51	8	86	0.85	P-loop domain
NODE_19_length_137834_cov_22.950344_118	NODE_19_length_137834	K01996	ABC transporter	P-loop domain	265	ABC_ATPase	PF09818.13	283	2.6e-05	23.6	0.3	2	2	0.0004	0.56	9.4	0	142	252	127	222	110	247	0.68	P-loop domain
NODE_19_length_137834_cov_22.950344_118	NODE_19_length_137834	K01996	ABC transporter	AAA domain	265	AAA_23	PF13476.10	201	0.001	19.9	0	1	1	1.2e-06	0.0016	19.2	0	20	41	31	52	5	104	0.82	AAA domain
NODE_19_length_137834_cov_22.950344_118	NODE_19_length_137834	K01996	ABC transporter	P-loop containing region of AAA domain	265	AAA_29	PF13555.10	61	0.0094	15.9	0.2	1	1	1.5e-05	0.02	14.8	0.2	15	42	23	50	13	55	0.78	P-loop containing region of AAA domain
NODE_19_length_137834_cov_22.950344_118	NODE_19_length_137834	K01996	ABC transporter	AAA domain	265	AAA_27	PF13514.10	207	0.012	15.4	0.1	1	1	1.5e-05	0.02	14.7	0.1	28	48	32	52	19	54	0.8	AAA domain
NODE_19_length_137834_cov_22.950344_118	NODE_19_length_137834	K01996	ABC transporter	Rad17 P-loop domain	265	Rad17	PF03215.19	186	0.016	15.4	0	1	1	1.6e-05	0.022	14.9	0	36	127	21	114	8	154	0.7	Rad17 P-loop domain
NODE_19_length_137834_cov_22.950344_118	NODE_19_length_137834	K01996	ABC transporter	RsgA GTPase	265	RsgA_GTPase	PF03193.20	174	0.022	14.8	0.1	1	1	2.9e-05	0.041	13.9	0.1	102	139	25	63	7	69	0.83	RsgA GTPase
NODE_19_length_137834_cov_22.950344_118	NODE_19_length_137834	K01996	ABC transporter	ATPase family associated with various cellular activities (AAA)	265	AAA	PF00004.33	131	0.023	15.3	0.1	1	2	0.00017	0.23	12.1	0	3	40	35	70	33	85	0.85	ATPase family associated with various cellular activities (AAA)
NODE_19_length_137834_cov_22.950344_118	NODE_19_length_137834	K01996	ABC transporter	ATPase family associated with various cellular activities (AAA)	265	AAA	PF00004.33	131	0.023	15.3	0.1	2	2	0.45	620	1	0	48	97	152	190	118	209	0.61	ATPase family associated with various cellular activities (AAA)
NODE_19_length_137834_cov_22.950344_118	NODE_19_length_137834	K01996	ABC transporter	AAA domain	265	AAA_30	PF13604.10	191	0.046	13.6	0.6	1	2	6.2e-05	0.087	12.7	0.1	19	48	31	60	21	67	0.83	AAA domain
NODE_19_length_137834_cov_22.950344_118	NODE_19_length_137834	K01996	ABC transporter	AAA domain	265	AAA_30	PF13604.10	191	0.046	13.6	0.6	2	2	2.9	4000	-2.5	0	32	43	179	190	147	210	0.58	AAA domain
NODE_19_length_137834_cov_22.950344_118	NODE_19_length_137834	K01996	ABC transporter	Double-GTPase 2	265	DO-GTPase2	PF19993.3	227	0.078	12.8	0.2	1	2	0.00012	0.16	11.8	0.1	2	21	32	51	31	72	0.8	Double-GTPase 2
NODE_19_length_137834_cov_22.950344_118	NODE_19_length_137834	K01996	ABC transporter	Double-GTPase 2	265	DO-GTPase2	PF19993.3	227	0.078	12.8	0.2	2	2	3.1	4400	-2.7	0	166	173	196	203	176	234	0.54	Double-GTPase 2
NODE_19_length_137834_cov_22.950344_118	NODE_19_length_137834	K01996	ABC transporter	50S ribosome-binding GTPase	265	MMR_HSR1	PF01926.27	113	0.083	13.2	0.2	1	2	0.00028	0.39	11	0.1	2	22	33	53	32	77	0.87	50S ribosome-binding GTPase
NODE_19_length_137834_cov_22.950344_118	NODE_19_length_137834	K01996	ABC transporter	50S ribosome-binding GTPase	265	MMR_HSR1	PF01926.27	113	0.083	13.2	0.2	2	2	0.99	1400	-0.4	0	48	85	163	201	148	223	0.57	50S ribosome-binding GTPase
NODE_19_length_137834_cov_22.950344_118	NODE_19_length_137834	K01996	ABC transporter	AAA domain	265	AAA_22	PF13401.10	130	0.093	13.2	0.3	1	2	0.00029	0.4	11.2	0	6	28	31	53	27	114	0.83	AAA domain
NODE_19_length_137834_cov_22.950344_118	NODE_19_length_137834	K01996	ABC transporter	AAA domain	265	AAA_22	PF13401.10	130	0.093	13.2	0.3	2	2	1	1400	-0.3	0	81	97	159	174	132	231	0.66	AAA domain
NODE_19_length_137834_cov_22.950344_118	NODE_19_length_137834	K01996	ABC transporter	NB-ARC domain	265	NB-ARC	PF00931.26	248	0.12	11.8	0.4	1	1	0.00018	0.24	10.8	0.4	12	39	24	51	14	59	0.79	NB-ARC domain
NODE_35_length_101232_cov_25.898195_25	NODE_35_length_101232	K01999	Periplasmic binding protein	Periplasmic binding protein	443	Peripla_BP_6	PF13458.10	343	6.1e-41	141.4	0	1	1	1.6e-44	8.4e-41	141	0	4	328	47	405	44	423	0.83	Periplasmic binding protein
NODE_85_length_55235_cov_24.926671_11	NODE_85_length_55235	K01999	PFAM Extracellular ligand-binding receptor	Periplasmic binding protein	455	Peripla_BP_6	PF13458.10	343	2.9e-35	122.8	6.6	1	1	3.7e-38	1.3e-34	120.6	6.6	2	319	75	409	74	429	0.84	Periplasmic binding protein
NODE_85_length_55235_cov_24.926671_11	NODE_85_length_55235	K01999	PFAM Extracellular ligand-binding receptor	Receptor family ligand binding region	455	ANF_receptor	PF01094.32	351	1.2e-34	120.1	0	1	1	5.7e-38	2e-34	119.4	0	8	348	100	428	95	431	0.81	Receptor family ligand binding region
NODE_36_length_101217_cov_22.961252_74	NODE_36_length_101217	K01999	COG0683 ABC-type branched-chain amino acid transport systems, periplasmic component	Periplasmic binding protein	464	Peripla_BP_6	PF13458.10	343	1.8e-33	116.8	0.5	1	1	9.3e-37	3.9e-33	115.8	0.5	1	330	81	425	81	438	0.85	Periplasmic binding protein
NODE_36_length_101217_cov_22.961252_74	NODE_36_length_101217	K01999	COG0683 ABC-type branched-chain amino acid transport systems, periplasmic component	Receptor family ligand binding region	464	ANF_receptor	PF01094.32	351	4.3e-30	105.1	0	1	1	1.4e-33	5.7e-30	104.7	0	3	349	102	434	100	436	0.88	Receptor family ligand binding region
NODE_15_length_162319_cov_24.491263_12	NODE_15_length_162319	K01999	Receptor family ligand binding region	Periplasmic binding protein domain	381	Peripla_BP_5	PF13433.10	363	1.5e-28	100.1	0.2	1	1	4.7e-32	2.4e-28	99.4	0.2	1	341	6	357	6	376	0.87	Periplasmic binding protein domain
NODE_69_length_66645_cov_22.017785_28	NODE_69_length_66645	K01999	Periplasmic binding protein domain	Periplasmic binding protein domain	442	Peripla_BP_5	PF13433.10	363	1.8e-24	86.7	0	1	1	5.3e-28	3.7e-24	85.7	0	1	323	54	392	54	402	0.81	Periplasmic binding protein domain
NODE_51_length_80973_cov_20.400477_28	NODE_51_length_80973	K01999	ABC-type branched-chain amino acid transport	Receptor family ligand binding region	417	ANF_receptor	PF01094.32	351	1.2e-22	80.6	0	1	1	3.1e-26	1.6e-22	80.2	0	4	296	57	345	55	377	0.86	Receptor family ligand binding region
NODE_69_length_66645_cov_22.017785_28	NODE_69_length_66645	K01999	Periplasmic binding protein domain	Receptor family ligand binding region	442	ANF_receptor	PF01094.32	351	9.9e-15	54.6	0	1	1	5e-18	3.5e-14	52.8	0	4	329	75	386	73	400	0.8	Receptor family ligand binding region
NODE_51_length_80973_cov_20.400477_28	NODE_51_length_80973	K01999	ABC-type branched-chain amino acid transport	Periplasmic binding protein domain	417	Peripla_BP_5	PF13433.10	363	9.6e-23	81	0.7	1	2	7.6e-18	4e-14	52.7	0.1	1	90	36	128	36	131	0.94	Periplasmic binding protein domain
NODE_34_length_102507_cov_23.483092_82	NODE_34_length_102507	K01997	Branched-chain amino acid transport system / permease component	Branched-chain amino acid transport system / permease component	297	BPD_transp_2	PF02653.20	269	1.1e-28	100.3	42.1	1	1	3.9e-32	2.7e-28	99.1	42.1	3	269	11	282	9	282	0.84	Branched-chain amino acid transport system / permease component
NODE_34_length_102507_cov_23.483092_82	NODE_34_length_102507	K01997	Branched-chain amino acid transport system / permease component	Family of unknown function (DUF6709)	297	DUF6709	PF20456.2	334	0.013	14.6	0.9	1	1	3.1e-06	0.021	14	0.9	163	239	122	198	112	239	0.8	Family of unknown function (DUF6709)
NODE_34_length_102507_cov_23.483092_82	NODE_34_length_102507	K01997	Branched-chain amino acid transport system / permease component	Mitochondrial import protein Pam17	297	Pam17	PF08566.14	165	1.1	9.4	5.9	1	2	0.0092	64	3.6	0.1	47	87	40	80	23	90	0.74	Mitochondrial import protein Pam17
NODE_34_length_102507_cov_23.483092_82	NODE_34_length_102507	K01997	Branched-chain amino acid transport system / permease component	Mitochondrial import protein Pam17	297	Pam17	PF08566.14	165	1.1	9.4	5.9	2	2	0.00094	6.5	6.8	2.2	33	101	195	258	191	261	0.72	Mitochondrial import protein Pam17
NODE_34_length_102507_cov_23.483092_83	NODE_34_length_102507	K01995,K01998	transport system permease	Branched-chain amino acid transport system / permease component	315	BPD_transp_2	PF02653.20	269	1.6e-21	76.8	33.6	1	1	1.1e-25	2.4e-21	76.3	33.6	5	269	37	292	33	293	0.85	Branched-chain amino acid transport system / permease component
NODE_34_length_102507_cov_23.483092_84	NODE_34_length_102507	K01996	ABC transporter	ABC transporter	239	ABC_tran	PF00005.31	137	1.7e-32	113.1	0	1	1	3.1e-35	2.5e-32	112.6	0	1	137	19	166	19	166	0.94	ABC transporter
NODE_34_length_102507_cov_23.483092_84	NODE_34_length_102507	K01996	ABC transporter	AAA domain, putative AbiEii toxin, Type IV TA system	239	AAA_21	PF13304.10	304	2.4e-11	44.3	0.6	1	2	3.8e-10	3.2e-07	30.8	0	1	61	31	91	31	104	0.81	AAA domain, putative AbiEii toxin, Type IV TA system
NODE_34_length_102507_cov_23.483092_84	NODE_34_length_102507	K01996	ABC transporter	AAA domain, putative AbiEii toxin, Type IV TA system	239	AAA_21	PF13304.10	304	2.4e-11	44.3	0.6	2	2	0.00019	0.16	12.1	0.1	233	276	133	173	103	189	0.72	AAA domain, putative AbiEii toxin, Type IV TA system
NODE_34_length_102507_cov_23.483092_84	NODE_34_length_102507	K01996	ABC transporter	AAA ATPase domain	239	AAA_15	PF13175.10	399	9.8e-08	32.2	0	1	2	1.8e-07	0.00015	21.7	0	12	47	17	53	16	77	0.83	AAA ATPase domain
NODE_34_length_102507_cov_23.483092_84	NODE_34_length_102507	K01996	ABC transporter	AAA ATPase domain	239	AAA_15	PF13175.10	399	9.8e-08	32.2	0	2	2	0.0018	1.5	8.5	0	351	387	153	189	133	197	0.8	AAA ATPase domain
NODE_34_length_102507_cov_23.483092_84	NODE_34_length_102507	K01996	ABC transporter	RecF/RecN/SMC N terminal domain	239	SMC_N	PF02463.23	220	2e-05	24.3	0.1	1	1	4.5e-07	0.00037	20.2	0.1	24	49	29	53	19	196	0.66	RecF/RecN/SMC N terminal domain
NODE_34_length_102507_cov_23.483092_84	NODE_34_length_102507	K01996	ABC transporter	P-loop containing region of AAA domain	239	AAA_29	PF13555.10	61	3e-05	23.9	0	1	1	7.5e-08	6.2e-05	22.9	0	19	39	26	46	17	53	0.79	P-loop containing region of AAA domain
NODE_34_length_102507_cov_23.483092_84	NODE_34_length_102507	K01996	ABC transporter	AAA domain	239	AAA_23	PF13476.10	201	5.8e-05	24	0.1	1	1	1.1e-07	9.1e-05	23.3	0.1	12	39	21	49	12	134	0.87	AAA domain
NODE_34_length_102507_cov_23.483092_84	NODE_34_length_102507	K01996	ABC transporter	P-loop domain	239	ABC_ATPase	PF09818.13	283	8.1e-05	22	0.3	1	3	0.00011	0.09	12	0.1	75	99	24	49	20	56	0.91	P-loop domain
NODE_34_length_102507_cov_23.483092_84	NODE_34_length_102507	K01996	ABC transporter	P-loop domain	239	ABC_ATPase	PF09818.13	283	8.1e-05	22	0.3	2	3	0.29	240	0.7	0	205	244	114	153	110	156	0.88	P-loop domain
NODE_34_length_102507_cov_23.483092_84	NODE_34_length_102507	K01996	ABC transporter	P-loop domain	239	ABC_ATPase	PF09818.13	283	8.1e-05	22	0.3	3	3	0.013	11	5.2	0	194	261	162	224	156	234	0.72	P-loop domain
NODE_34_length_102507_cov_23.483092_84	NODE_34_length_102507	K01996	ABC transporter	AAA domain	239	AAA_25	PF13481.10	194	0.00015	21.7	0.1	1	2	4.5e-05	0.037	13.8	0	30	65	26	63	21	75	0.73	AAA domain
NODE_34_length_102507_cov_23.483092_84	NODE_34_length_102507	K01996	ABC transporter	AAA domain	239	AAA_25	PF13481.10	194	0.00015	21.7	0.1	2	2	0.018	15	5.3	0.1	44	95	186	232	182	236	0.83	AAA domain
NODE_34_length_102507_cov_23.483092_84	NODE_34_length_102507	K01996	ABC transporter	AAA domain	239	AAA_27	PF13514.10	207	0.00068	19.5	0	1	1	1.6e-06	0.0013	18.5	0	17	49	20	52	9	59	0.83	AAA domain
NODE_34_length_102507_cov_23.483092_84	NODE_34_length_102507	K01996	ABC transporter	AAA domain	239	AAA_22	PF13401.10	130	0.00092	19.7	0.8	1	1	9e-06	0.0075	16.8	0.8	6	109	30	182	27	201	0.67	AAA domain
NODE_34_length_102507_cov_23.483092_84	NODE_34_length_102507	K01996	ABC transporter	AAA ATPase domain	239	AAA_16	PF13191.10	167	0.0018	19	0.6	1	1	7.4e-06	0.0062	17.3	0.5	19	45	26	50	15	195	0.87	AAA ATPase domain
NODE_34_length_102507_cov_23.483092_84	NODE_34_length_102507	K01996	ABC transporter	AAA domain	239	AAA_14	PF13173.10	130	0.0074	16.5	0.1	1	3	0.00065	0.54	10.5	0.1	3	23	30	50	28	75	0.86	AAA domain
NODE_34_length_102507_cov_23.483092_84	NODE_34_length_102507	K01996	ABC transporter	AAA domain	239	AAA_14	PF13173.10	130	0.0074	16.5	0.1	2	3	0.73	610	0.6	0	72	107	117	147	115	163	0.79	AAA domain
NODE_34_length_102507_cov_23.483092_84	NODE_34_length_102507	K01996	ABC transporter	AAA domain	239	AAA_14	PF13173.10	130	0.0074	16.5	0.1	3	3	0.4	330	1.5	0	11	21	184	194	180	230	0.82	AAA domain
NODE_34_length_102507_cov_23.483092_84	NODE_34_length_102507	K01996	ABC transporter	AAA domain	239	AAA_33	PF13671.10	143	0.008	16.6	0.1	1	1	2e-05	0.017	15.6	0.1	1	21	31	51	31	168	0.85	AAA domain
NODE_34_length_102507_cov_23.483092_84	NODE_34_length_102507	K01996	ABC transporter	ATPase domain predominantly from Archaea	239	ATPase_2	PF01637.22	225	0.015	15.3	0	1	2	0.0001	0.087	12.8	0	22	53	31	61	19	127	0.83	ATPase domain predominantly from Archaea
NODE_34_length_102507_cov_23.483092_84	NODE_34_length_102507	K01996	ABC transporter	ATPase domain predominantly from Archaea	239	ATPase_2	PF01637.22	225	0.015	15.3	0	2	2	0.68	570	0.3	0	24	39	179	194	171	230	0.85	ATPase domain predominantly from Archaea
NODE_34_length_102507_cov_23.483092_84	NODE_34_length_102507	K01996	ABC transporter	NACHT domain	239	NACHT	PF05729.16	167	0.019	15	0.1	1	1	5.7e-05	0.047	13.7	0.1	1	21	30	50	30	59	0.89	NACHT domain
NODE_34_length_102507_cov_23.483092_84	NODE_34_length_102507	K01996	ABC transporter	AAA domain	239	AAA_30	PF13604.10	191	0.043	13.7	0.1	1	2	0.00036	0.3	11	0	18	38	29	49	23	62	0.86	AAA domain
NODE_34_length_102507_cov_23.483092_84	NODE_34_length_102507	K01996	ABC transporter	AAA domain	239	AAA_30	PF13604.10	191	0.043	13.7	0.1	2	2	0.78	650	0.1	0	83	109	150	176	126	193	0.71	AAA domain
NODE_34_length_102507_cov_23.483092_84	NODE_34_length_102507	K01996	ABC transporter	RsgA GTPase	239	RsgA_GTPase	PF03193.20	174	0.048	13.7	0.1	1	1	0.00011	0.095	12.7	0.1	105	129	28	52	14	61	0.83	RsgA GTPase
NODE_34_length_102507_cov_23.483092_84	NODE_34_length_102507	K01996	ABC transporter	Type II/IV secretion system protein	239	T2SSE	PF00437.24	269	0.07	12.4	0.1	1	2	0.00018	0.15	11.4	0.1	131	155	30	54	3	68	0.77	Type II/IV secretion system protein
NODE_34_length_102507_cov_23.483092_84	NODE_34_length_102507	K01996	ABC transporter	Type II/IV secretion system protein	239	T2SSE	PF00437.24	269	0.07	12.4	0.1	2	2	5.6	4700	-3.4	0	234	254	174	198	168	208	0.62	Type II/IV secretion system protein
NODE_34_length_102507_cov_23.483092_84	NODE_34_length_102507	K01996	ABC transporter	Dynein light intermediate chain (DLIC)	239	DLIC	PF05783.15	471	0.095	11.7	0	1	1	0.00017	0.14	11.2	0	20	55	24	59	17	62	0.88	Dynein light intermediate chain (DLIC)
NODE_34_length_102507_cov_23.483092_84	NODE_34_length_102507	K01996	ABC transporter	FtsK/SpoIIIE family	239	FtsK_SpoIIIE	PF01580.22	221	0.096	12.3	0.2	1	2	0.0007	0.58	9.8	0	42	59	32	49	19	51	0.89	FtsK/SpoIIIE family
NODE_34_length_102507_cov_23.483092_84	NODE_34_length_102507	K01996	ABC transporter	FtsK/SpoIIIE family	239	FtsK_SpoIIIE	PF01580.22	221	0.096	12.3	0.2	2	2	0.42	350	0.7	0	77	132	80	147	67	226	0.74	FtsK/SpoIIIE family
NODE_34_length_102507_cov_23.483092_84	NODE_34_length_102507	K01996	ABC transporter	Novel STAND NTPase 1	239	nSTAND1	PF20703.1	380	0.13	12.1	0	1	1	0.00028	0.23	11.2	0	25	51	21	47	13	73	0.83	Novel STAND NTPase 1
NODE_34_length_102507_cov_23.483092_84	NODE_34_length_102507	K01996	ABC transporter	AAA domain	239	AAA_19	PF13245.10	135	0.15	12.4	0.1	1	2	0.00075	0.62	10.4	0	12	37	30	55	22	99	0.88	AAA domain
NODE_34_length_102507_cov_23.483092_84	NODE_34_length_102507	K01996	ABC transporter	AAA domain	239	AAA_19	PF13245.10	135	0.15	12.4	0.1	2	2	3.6	3000	-1.5	0	89	101	153	165	134	193	0.72	AAA domain
NODE_34_length_102507_cov_23.483092_84	NODE_34_length_102507	K01996	ABC transporter	AAA-like domain	239	AAA_10	PF12846.11	362	0.18	11	0	1	1	0.00033	0.28	10.4	0	24	57	32	65	21	80	0.88	AAA-like domain
NODE_34_length_102507_cov_23.483092_84	NODE_34_length_102507	K01996	ABC transporter	KaiC	239	ATPase	PF06745.17	231	0.22	11.1	0.2	1	2	0.0015	1.2	8.6	0.1	16	35	26	45	22	53	0.9	KaiC
NODE_34_length_102507_cov_23.483092_84	NODE_34_length_102507	K01996	ABC transporter	KaiC	239	ATPase	PF06745.17	231	0.22	11.1	0.2	2	2	0.66	550	-0.1	0	144	166	176	198	149	228	0.83	KaiC
NODE_34_length_102507_cov_23.483092_84	NODE_34_length_102507	K01996	ABC transporter	AAA domain	239	AAA_24	PF13479.10	195	0.24	11.4	0.1	1	1	0.00057	0.47	10.4	0.1	6	22	33	49	28	71	0.84	AAA domain
NODE_34_length_102507_cov_23.483092_85	NODE_34_length_102507	K01995,K01998	ABC transporter	ABC transporter	235	ABC_tran	PF00005.31	137	3.3e-34	118.7	0	1	1	6.1e-37	4.7e-34	118.2	0	1	137	17	163	17	163	0.97	ABC transporter
NODE_34_length_102507_cov_23.483092_85	NODE_34_length_102507	K01995,K01998	ABC transporter	AAA domain, putative AbiEii toxin, Type IV TA system	235	AAA_21	PF13304.10	304	5.3e-15	56.3	1.7	1	2	3.7e-07	0.00029	21.1	0.5	1	20	29	48	29	83	0.83	AAA domain, putative AbiEii toxin, Type IV TA system
NODE_34_length_102507_cov_23.483092_85	NODE_34_length_102507	K01995,K01998	ABC transporter	AAA domain, putative AbiEii toxin, Type IV TA system	235	AAA_21	PF13304.10	304	5.3e-15	56.3	1.7	2	2	2.7e-11	2.1e-08	34.7	0	231	296	128	190	106	198	0.88	AAA domain, putative AbiEii toxin, Type IV TA system
NODE_34_length_102507_cov_23.483092_85	NODE_34_length_102507	K01995,K01998	ABC transporter	Branched-chain amino acid ATP-binding cassette transporter	235	BCA_ABC_TP_C	PF12399.12	27	2.4e-09	36.8	2.9	1	3	2.6	2000	-1.3	0	20	24	58	62	57	63	0.84	Branched-chain amino acid ATP-binding cassette transporter
NODE_34_length_102507_cov_23.483092_85	NODE_34_length_102507	K01995,K01998	ABC transporter	Branched-chain amino acid ATP-binding cassette transporter	235	BCA_ABC_TP_C	PF12399.12	27	2.4e-09	36.8	2.9	2	3	0.43	330	1.2	0	14	19	166	171	166	172	0.93	Branched-chain amino acid ATP-binding cassette transporter
NODE_34_length_102507_cov_23.483092_85	NODE_34_length_102507	K01995,K01998	ABC transporter	Branched-chain amino acid ATP-binding cassette transporter	235	BCA_ABC_TP_C	PF12399.12	27	2.4e-09	36.8	2.9	3	3	2.7e-11	2.1e-08	33.8	0.6	2	23	212	233	212	234	0.95	Branched-chain amino acid ATP-binding cassette transporter
NODE_34_length_102507_cov_23.483092_85	NODE_34_length_102507	K01995,K01998	ABC transporter	RecF/RecN/SMC N terminal domain	235	SMC_N	PF02463.23	220	5.6e-06	26.1	0.3	1	2	4.7e-05	0.036	13.7	0.1	25	44	28	47	12	79	0.79	RecF/RecN/SMC N terminal domain
NODE_34_length_102507_cov_23.483092_85	NODE_34_length_102507	K01995,K01998	ABC transporter	RecF/RecN/SMC N terminal domain	235	SMC_N	PF02463.23	220	5.6e-06	26.1	0.3	2	2	0.00036	0.27	10.8	0	135	209	127	205	80	212	0.72	RecF/RecN/SMC N terminal domain
NODE_34_length_102507_cov_23.483092_85	NODE_34_length_102507	K01995,K01998	ABC transporter	AAA domain	235	AAA_22	PF13401.10	130	1.7e-05	25.3	0.3	1	1	8.4e-08	6.4e-05	23.5	0.3	9	120	31	189	24	195	0.81	AAA domain
NODE_34_length_102507_cov_23.483092_85	NODE_34_length_102507	K01995,K01998	ABC transporter	AAA ATPase domain	235	AAA_16	PF13191.10	167	4.7e-05	24.1	0.2	1	1	1.8e-07	0.00014	22.6	0.2	12	139	20	159	9	192	0.57	AAA ATPase domain
NODE_34_length_102507_cov_23.483092_85	NODE_34_length_102507	K01995,K01998	ABC transporter	AAA domain	235	AAA_23	PF13476.10	201	0.00035	21.4	0	1	1	7.5e-07	0.00057	20.7	0	8	40	15	48	6	50	0.83	AAA domain
NODE_34_length_102507_cov_23.483092_85	NODE_34_length_102507	K01995,K01998	ABC transporter	AAA domain	235	AAA_30	PF13604.10	191	0.00052	20	0.2	1	1	2.2e-06	0.0017	18.3	0.2	18	65	27	81	14	194	0.58	AAA domain
NODE_34_length_102507_cov_23.483092_85	NODE_34_length_102507	K01995,K01998	ABC transporter	P-loop containing region of AAA domain	235	AAA_29	PF13555.10	61	0.00089	19.2	0	1	1	2.5e-06	0.0019	18.1	0	15	40	20	45	15	50	0.83	P-loop containing region of AAA domain
NODE_34_length_102507_cov_23.483092_85	NODE_34_length_102507	K01995,K01998	ABC transporter	Novel STAND NTPase 1	235	nSTAND1	PF20703.1	380	0.0013	18.6	0.1	1	1	3.3e-06	0.0025	17.7	0.1	15	51	9	45	4	47	0.94	Novel STAND NTPase 1
NODE_34_length_102507_cov_23.483092_85	NODE_34_length_102507	K01995,K01998	ABC transporter	Magnesium chelatase, subunit ChlI	235	Mg_chelatase	PF01078.25	207	0.0036	16.9	0.1	1	2	0.004	3.1	7.3	0	22	44	27	49	7	75	0.81	Magnesium chelatase, subunit ChlI
NODE_34_length_102507_cov_23.483092_85	NODE_34_length_102507	K01995,K01998	ABC transporter	Magnesium chelatase, subunit ChlI	235	Mg_chelatase	PF01078.25	207	0.0036	16.9	0.1	2	2	0.0028	2.1	7.9	0	107	161	153	212	130	234	0.63	Magnesium chelatase, subunit ChlI
NODE_34_length_102507_cov_23.483092_85	NODE_34_length_102507	K01995,K01998	ABC transporter	ATPase family associated with various cellular activities (AAA)	235	AAA	PF00004.33	131	0.012	16.3	0.2	1	2	0.00034	0.26	11.9	0	3	21	32	50	30	86	0.89	ATPase family associated with various cellular activities (AAA)
NODE_34_length_102507_cov_23.483092_85	NODE_34_length_102507	K01995,K01998	ABC transporter	ATPase family associated with various cellular activities (AAA)	235	AAA	PF00004.33	131	0.012	16.3	0.2	2	2	0.39	300	2	0	52	97	145	182	119	200	0.6	ATPase family associated with various cellular activities (AAA)
NODE_34_length_102507_cov_23.483092_85	NODE_34_length_102507	K01995,K01998	ABC transporter	AAA ATPase domain	235	AAA_15	PF13175.10	399	0.012	15.4	0.1	1	1	2.6e-05	0.02	14.7	0.1	12	43	15	47	15	49	0.87	AAA ATPase domain
NODE_34_length_102507_cov_23.483092_85	NODE_34_length_102507	K01995,K01998	ABC transporter	AAA domain (dynein-related subfamily)	235	AAA_5	PF07728.18	139	0.013	15.7	0.3	1	2	0.0016	1.2	9.3	0	4	33	32	61	30	67	0.77	AAA domain (dynein-related subfamily)
NODE_34_length_102507_cov_23.483092_85	NODE_34_length_102507	K01995,K01998	ABC transporter	AAA domain (dynein-related subfamily)	235	AAA_5	PF07728.18	139	0.013	15.7	0.3	2	2	0.043	33	4.7	0	59	96	141	183	92	223	0.82	AAA domain (dynein-related subfamily)
NODE_34_length_102507_cov_23.483092_85	NODE_34_length_102507	K01995,K01998	ABC transporter	50S ribosome-binding GTPase	235	MMR_HSR1	PF01926.27	113	0.044	14.1	0.3	1	2	0.00023	0.17	12.2	0.1	2	21	30	49	29	57	0.92	50S ribosome-binding GTPase
NODE_34_length_102507_cov_23.483092_85	NODE_34_length_102507	K01995,K01998	ABC transporter	50S ribosome-binding GTPase	235	MMR_HSR1	PF01926.27	113	0.044	14.1	0.3	2	2	2.3	1800	-0.8	0	48	84	155	191	139	224	0.58	50S ribosome-binding GTPase
[truncated: 436 more rows]

## Sheet: Supplementary Table 8
Supplementary Table 8. DeepTMHMM results for BCAA transporter proteins in Calditenuis ramacidaminiphagus LZTs
[truncated: 370 more rows]

[truncated: 22 more sheets: Supplementary Table 9, Supplementary Table 10, Supplementary Table 11, Supplementary Table 12, Supplementary Table 13, Supplementary Table 14, Supplementary Table 15, Supplementary Table 16, Supplementary Table 17, Supplementary Table 18, Supplementary Table 19, Supplementary Table 20, Supplementary Table 21, Supplementary Table 22, Supplementary Table 23, Supplementary Table 24, Supplementary Table 25, Supplementary Table 26, Supplementary Table 27, Supplementary Table 28 …]
