# Supplementary material for: Branched-chain amino acid specialization drove diversification within Calditenuaceae (Caldarchaeia) and enables their cultivation
Source: Research Square preprint supplement (doi:10.21203/rs.3.rs-6038074/v1), 2025-03-26
Supplement: Supplementary file 2 [file 7bf429fe1da57a94213ac248.docx]

**Additional information regarding data availability:**

The raw sequences for nomenclatural type genomes are available in the Sequence Read Archive (SRA) under the accession numbers SRR30574052, SRR30574051, and SRR32545976. The sequence with temporary ID SUB15147207 is awaiting review by curators. MAGs are available under the accession numbers listed in Supplementary Table 18, with several still awaiting assignment.

The 16S rRNA raw reads from lab cultures amended with BCAA, PAA, and BPAA are available under the temporary SRA accession SUB15150641, pending curator review.

The MAGs and 16S rRNA raw reads from lab cultures amended with BCAA, PAA, and BPAA can be accessed for reviewing purposes via the following link:

<https://springernature-my.sharepoint.com/:u:/p/cesar_sanchez1/EbbWsTvb905EvnsGMgtsV1gBn_kLOAYGu5o-_bumfbWzrQ?e=cKmOeY>

Metaproteomics data (MSV000093641) are accessible via the Center for Computational Mass Spectrometry’s MassIVE repository through the ProteomeXchange Consortium. The description on the website should be modified to indicate that this is a metaproteome (and not specific to one organism), and we have informed the UC-Davis Metaproteomics Center to update it.

Data availability will be updated for the next submission.
