# Supplementary material for: Branched-chain amino acid specialization drove diversification within Calditenuaceae (Caldarchaeia) and enables their cultivation
Source: Research Square preprint supplement (doi:10.21203/rs.3.rs-6038074/v1), 2025-03-26
Supplement: Supplementary file 3 [file 9fb1cff9273412da95d9a065.xlsx]

## Sheet: Source Data 1
Source Data 1. Differential abundance analysis between Calditenuis and the other genera in Calditenuaceae using DESeq2
KOs	Functions	baseMean	pvalue	FDR	log2FoldChange
K01998	livM; branched-chain amino acid transport system permease protein	5.14871	3.71171e-13	1.31024e-10	-1.65298
K03520	coxL, cutL; aerobic carbon-monoxide dehydrogenase large subunit [EC:1.2.5.3]	3.38734	2.53215e-08	4.46924e-06	-1.55959
K01997	livH; branched-chain amino acid transport system permease protein	4.38172	4.58739e-08	5.39782e-06	-1.34819
K07076	K07076; uncharacterized protein	3.68872	9.70404e-08	8.56381e-06	-1.65631
K02032	ddpF; peptide/nickel transport system ATP-binding protein	6.85042	3.31933e-07	2.34345e-05	1.89592
K02031	ddpD; peptide/nickel transport system ATP-binding protein	6.33473	1.12141e-06	5.82455e-05	1.77388
K10112	msmX, msmK, malK, sugC, ggtA, msiK; multiple sugar transport system ATP-binding protein [EC:7.5.2.-]	4.51327	1.15501e-06	5.82455e-05	2.4807
K01996	livF; branched-chain amino acid transport system ATP-binding protein	4.28093	1.57547e-06	6.95177e-05	-1.19982
K01995	livG; branched-chain amino acid transport system ATP-binding protein	5.29445	2.47262e-06	8.70761e-05	-1.07647
K02027	ABC.MS.S; multiple sugar transport system substrate-binding protein	4.41933	2.65218e-06	8.70761e-05	2.28709
K15771	ganP, mdxF; arabinogalactan oligomer / maltooligosaccharide transport system permease protein	4.41917	2.71342e-06	8.70761e-05	2.28708
K00249	ACADM, acd; acyl-CoA dehydrogenase [EC:1.3.8.7]	3.04455	4.08146e-06	0.000120063	-1.34249
K02026	ABC.MS.P1; multiple sugar transport system permease protein	3.75536	2.31737e-05	0.000629255	2.19827
K02025	ABC.MS.P; multiple sugar transport system permease protein	3.85306	2.70922e-05	0.000683111	2.07618
K16786	ecfA1; energy-coupling factor transport system ATP-binding protein [EC:7.-.-.-]	3.22061	0.000183487	0.00431807	-1.11282
K03518	coxS; aerobic carbon-monoxide dehydrogenase small subunit [EC:1.2.5.3]	3.2626	0.000376436	0.00830511	-1.03161
K15510	fgd1; coenzyme F420-dependent glucose-6-phosphate dehydrogenase [EC:1.1.98.2]	4.272	0.00049418	0.010243	1.31433
K07302	iorA; isoquinoline 1-oxidoreductase subunit alpha [EC:1.3.99.16]	3.1394	0.000522306	0.010243	-1.02462
K01999	livK; branched-chain amino acid transport system substrate-binding protein	4.00843	0.00059525	0.0110591	-0.910434
K02033	ABC.PE.P; peptide/nickel transport system permease protein	5.7206	0.000744328	0.0131374	1.07233
K16787	ecfA2; energy-coupling factor transport system ATP-binding protein [EC:7.-.-.-]	4.23457	0.0010244	0.0172197	-0.866363
K01069	gloB, gloC, HAGH; hydroxyacylglutathione hydrolase [EC:3.1.2.6]	2.44999	0.00155483	0.0249479	-1.04722
K02049	ABC.SN.A; NitT/TauT family transport system ATP-binding protein	2.79553	0.00306786	0.0470849	-0.923739
K10823	oppF; oligopeptide transport system ATP-binding protein	3.9209	0.00390782	0.0574775	1.08882
K01897	ACSL, fadD; long-chain acyl-CoA synthetase [EC:6.2.1.3]	2.07801	0.00456662	0.0629425	-1.01836
K02034	ABC.PE.P1; peptide/nickel transport system permease protein	5.15517	0.00463599	0.0629425	0.899968
K16149	K16149; 1,4-alpha-glucan branching enzyme [EC:2.4.1.18]	2.49182	0.00535632	0.0675279	1.39382
K16150	K16150; glycogen synthase [EC:2.4.1.11]	2.49182	0.00535632	0.0675279	1.39382
K00172	porC, porG; pyruvate ferredoxin oxidoreductase gamma subunit [EC:1.2.7.1]	2.31997	0.00574612	0.0699442	1.44746
K01190	lacZ; beta-galactosidase [EC:3.2.1.23]	2.29311	0.0066307	0.0780212	1.43011
K07448	mrr; restriction system protein	2.41877	0.00740347	0.0841528	1.34555
K02035	ABC.PE.S; peptide/nickel transport system substrate-binding protein	5.30334	0.00762858	0.0841528	0.831766
K07068	K07068; uncharacterized protein	4.20158	0.00899221	0.0961894	-0.688913
K10824	nikE, cntF; nickel transport system ATP-binding protein [EC:7.2.2.11]	2.367	0.00960191	0.0996904	1.31206
K00590	E2.1.1.113; site-specific DNA-methyltransferase (cytosine-N4-specific) [EC:2.1.1.113]	4.56922	0.0114473	0.115455	0.820574
K13497	trpGD; anthranilate synthase/phosphoribosyltransferase [EC:4.1.3.27 2.4.2.18]	3.43311	0.0124453	0.118735	0.95717
K21835	adf; secondary-alcohol dehydrogenase (coenzyme-F420) [EC:1.1.98.5]	2.17431	0.0122252	0.118735	1.3421
K10118	msmF; raffinose/stachyose/melibiose transport system permease protein	2.09826	0.0154988	0.143976	1.28601
K01895	ACSS1_2, acs; acetyl-CoA synthetase [EC:6.2.1.1]	3.06462	0.0184825	0.16729	-0.721411
K00170	porB; pyruvate ferredoxin oxidoreductase beta subunit [EC:1.2.7.1]	2.02406	0.0205895	0.181702	1.22791
K00425	cydA; cytochrome bd ubiquinol oxidase subunit I [EC:7.1.1.7]	2.02562	0.0214276	0.184487	1.22808
K03522	fixB, etfA; electron transfer flavoprotein alpha subunit	3.0613	0.0300557	0.241682	0.862062
K01271	pepQ; Xaa-Pro dipeptidase [EC:3.4.13.9]	3.33458	0.0299849	0.241682	0.81823
K19975	mntC; manganese transport system substrate-binding protein	2.36924	0.0301247	0.241682	1.01499
K19244	ala; alanine dehydrogenase [EC:1.4.1.1]	2.1766	0.0313751	0.24612	-0.767053
K11955	natC; neutral amino acid transport system permease protein	2.37576	0.0350081	0.267799	-0.723638
K07291	dipps; CDP-L-myo-inositol myo-inositolphosphotransferase [EC:2.7.8.34]	2.32341	0.0356559	0.267799	0.980799
K03243	EIF5B; translation initiation factor 5B	2.47431	0.0373171	0.274436	-0.704447
K02057	ABC.SS.P; simple sugar transport system permease protein	3.11678	0.0392429	0.282709	-0.634497
K00169	porA; pyruvate ferredoxin oxidoreductase alpha subunit [EC:1.2.7.1]	3.08706	0.0442712	0.306426	0.779616
K01637	E4.1.3.1, aceA; isocitrate lyase [EC:4.1.3.1]	2.05103	0.0441581	0.306426	-0.739538
K07052	K07052; CAAX protease family protein	2.24749	0.0483858	0.328465	0.927017
K21947	ttuA; tRNA-5-methyluridine54 2-sulfurtransferase [EC:2.8.1.15]	2.07585	0.051463	0.342763	-0.713988
K15582	oppC; oligopeptide transport system permease protein	2.91028	0.0541988	0.354299	0.778465
K00941	thiD; hydroxymethylpyrimidine/phosphomethylpyrimidine kinase [EC:2.7.1.49 2.7.4.7]	2.40087	0.066811	0.428805	-0.632395
K07333	flaJ; archaeal flagellar protein FlaJ	2.59531	0.0729528	0.455545	-0.601652
K00973	rfbA, rmlA, rffH; glucose-1-phosphate thymidylyltransferase [EC:2.7.7.24]	2.94107	0.0735582	0.455545	0.696536
K00626	ACAT, atoB; acetyl-CoA C-acetyltransferase [EC:2.3.1.9]	4.12733	0.0767246	0.466962	-0.482055
K00059	fabG, OAR1; 3-oxoacyl-[acyl-carrier protein] reductase [EC:1.1.1.100]	3.08947	0.0802126	0.479916	-0.541704
K08978	TC.BAT1; bacterial/archaeal transporter family protein	2.17578	0.0894427	0.526221	-0.61609
K01905	acdA; acetate---CoA ligase (ADP-forming) subunit alpha [EC:6.2.1.13]	2.22485	0.0910577	0.52694	0.774876
K15016	K15016; enoyl-CoA hydratase / 3-hydroxyacyl-CoA dehydrogenase [EC:4.2.1.17 1.1.1.35]	3.80817	0.0951709	0.540286	-0.469701
K02322	polC; DNA polymerase II large subunit [EC:2.7.7.7]	2.94363	0.0964249	0.540286	-0.528961
K07220	K07220; uncharacterized protein	2.10217	0.0995098	0.548859	-0.609497
K00303	soxB; sarcosine oxidase, subunit beta [EC:1.5.3.24 1.5.3.1]	2.96685	0.104902	0.569699	-0.511545
K07025	K07025; putative hydrolase of the HAD superfamily	2.12628	0.110407	0.585662	-0.5854
K03519	coxM, cutM; aerobic carbon-monoxide dehydrogenase medium subunit [EC:1.2.5.3]	2.49553	0.11116	0.585662	-0.549009
K02056	ABC.SS.A; simple sugar transport system ATP-binding protein [EC:7.5.2.-]	2.32534	0.120129	0.605792	-0.555043
K03116	tatA; sec-independent protein translocase protein TatA	2.66886	0.117868	0.605792	0.628542
K22224	acdB; acetate---CoA ligase (ADP-forming) subunit beta [EC:6.2.1.13]	2.15028	0.118836	0.605792	0.717486
K00320	mer; 5,10-methylenetetrahydromethanopterin reductase [EC:1.5.98.2]	3.01626	0.131038	0.651501	-0.477978
K02948	RP-S11, MRPS11, rpsK; small subunit ribosomal protein S11	2.7433	0.140913	0.672191	0.577465
K20215	dph5; diphthine synthase [EC:2.1.1.98]	2.17633	0.139718	0.672191	-0.537941
K03703	uvrC; excinuclease ABC subunit C	2.54693	0.138089	0.672191	-0.508795
K00728	POMT, pmt; dolichyl-phosphate-mannose-protein mannosyltransferase [EC:2.4.1.109]	2.86782	0.144854	0.681779	0.560299
K07332	flaI; archaeal flagellar protein FlaI	3.7317	0.148671	0.682417	-0.415803
K06154	lysM; Lrp/AsnC family transcriptional regulator, involved in the regulation of lysine biosynthesis	2.47017	0.148856	0.682417	0.600588
K16785	ecfT; energy-coupling factor transport system permease protein	2.57499	0.153705	0.688471	-0.488648
K13280	SEC11, sipW; signal peptidase I [EC:3.4.21.89]	2.967	0.154077	0.688471	-0.452958
K21220	thiN; thiamine-phosphate diphosphorylase [EC:2.5.1.3]	2.2012	0.157668	0.695712	-0.514672
K00891	aroK, aroL; shikimate kinase [EC:2.7.1.71]	2.69234	0.165687	0.722068	0.54596
K01902	sucD; succinyl-CoA synthetase alpha subunit [EC:6.2.1.5]	2.02828	0.171953	0.740235	-0.518911
K09685	purR; purine operon repressor	2.66831	0.178428	0.758858	0.530078
K00797	speE, SRM, SPE3; spermidine synthase [EC:2.5.1.16]	3.41063	0.18735	0.769008	0.456336
K06915	herA; DNA double-strand break repair helicase HerA and related ATPase	4.47555	0.187122	0.769008	-0.361659
K07090	K07090; uncharacterized protein	2.79545	0.185227	0.769008	0.515246
K03785	aroD; 3-dehydroquinate dehydratase I [EC:4.2.1.10]	2.64317	0.192389	0.771743	0.51392
K01840	manB; phosphomannomutase [EC:5.4.2.8]	2.15167	0.191982	0.771743	-0.481414
K02823	pyrDII; dihydroorotate dehydrogenase electron transfer subunit	2.61762	0.208255	0.826002	0.497534
K03294	TC.APA; basic amino acid/polyamine antiporter, APA family	2.62201	0.21492	0.842963	0.497984
K01533	copB; P-type Cu2+ transporter [EC:7.2.2.9]	2.57343	0.222296	0.862314	-0.42053
K07159	K07159; uncharacterized protein	4.08002	0.230145	0.864267	-0.332394
K07096	K07096; uncharacterized protein	2.59638	0.227697	0.864267	0.481377
K09386	K09386; uncharacterized protein	2.46778	0.225916	0.864267	0.495495
K06963	TAN1, THUMPD1; tRNA acetyltransferase TAN1	2.39666	0.239803	0.873069	-0.417598
K06927	DPH6; diphthine-ammonia ligase [EC:6.3.1.14]	2.44764	0.240534	0.873069	0.478478
K03709	troR; DtxR family transcriptional regulator, Mn-dependent transcriptional regulator	2.4014	0.240997	0.873069	-0.417092
K17686	copA, ctpA, ATP7; P-type Cu+ transporter [EC:7.2.2.8]	2.59801	0.242969	0.873069	-0.401437
K07152	SCO1; protein SCO1	2.44404	0.244855	0.873069	0.478287
K00549	metE; 5-methyltetrahydropteroyltriglutamate--homocysteine methyltransferase [EC:2.1.1.14]	3.21481	0.25646	0.896341	-0.351128
K03593	mrp, NUBPL; ATP-binding protein involved in chromosome partitioning	3.65703	0.25559	0.896341	0.372131
K07504	K07504; predicted type IV restriction endonuclease	2.17179	0.259082	0.896628	0.491078
K13993	HSP20; HSP20 family protein	2.42595	0.261687	0.896849	-0.396658
K00368	nirK; nitrite reductase (NO-forming) [EC:1.7.2.1]	4.6138	0.284318	0.951803	-0.29844
K02050	ABC.SN.P; NitT/TauT family transport system permease protein	2.54808	0.28581	0.951803	-0.370136
K02433	gatA, QRSL1; aspartyl-tRNA(Asn)/glutamyl-tRNA(Gln) amidotransferase subunit A [EC:6.3.5.6 6.3.5.7]	2.05283	0.284408	0.951803	-0.408587
K02004	ABC.CD.P; putative ABC transport system permease protein	3.23664	0.293631	0.968708	0.3647
K07059	K07059; uncharacterized protein	2.49446	0.299071	0.977521	0.413164
K07496	K07496; putative transposase	2.45122	0.31028	0.986747	0.480558
K03042	rpoA2; DNA-directed RNA polymerase subunit A" [EC:2.7.7.6]	2.47219	0.309852	0.986747	-0.356899
K19976	mntB; manganese transport system permease protein	2.24737	0.304705	0.986747	0.436825
K01611	speD, AMD1; S-adenosylmethionine decarboxylase [EC:4.1.1.50]	3.01481	0.497154	0.992945	0.238099
K01784	galE, GALE; UDP-glucose 4-epimerase [EC:5.1.3.2]	4.42172	0.316882	0.992945	0.30064
K00337	nuoH; NADH-quinone oxidoreductase subunit H [EC:7.1.1.2]	2.07835	0.839699	0.992945	0.0829007
K07012	cas3; CRISPR-associated endonuclease/helicase Cas3 [EC:3.1.-.- 5.6.2.4]	2.64398	0.67133	0.992945	0.158073
K03148	thiF; sulfur carrier protein ThiS adenylyltransferase [EC:2.7.7.73]	2.44441	0.34575	0.992945	0.37805
K03231	EEF1A; elongation factor 1-alpha	2.96645	0.982258	0.992945	-0.00751964
K03718	asnC; Lrp/AsnC family transcriptional regulator, regulator for asnA, asnC and gidA	4.77	0.398952	0.992945	0.236431
K01693	hisB; imidazoleglycerol-phosphate dehydratase [EC:4.2.1.19]	2.00258	0.832633	0.992945	-0.085425
K02319	pol; DNA polymerase, archaea type [EC:2.7.7.7]	6.00619	0.962711	0.992945	0.0159338
K07489	K07489; transposase	2.98919	0.645971	0.992945	-0.253051
K01537	ATP2C; P-type Ca2+ transporter type 2C [EC:7.2.2.10]	2.12635	0.580955	0.992945	0.229436
K01687	ilvD; dihydroxy-acid dehydratase [EC:4.2.1.9]	2.103	0.797857	0.992945	0.104584
K00013	hisD; histidinol dehydrogenase [EC:1.1.1.23]	2.10215	0.475542	0.992945	-0.274058
K03320	amt, AMT, MEP; ammonium transporter, Amt family	2.12436	0.680338	0.992945	-0.161761
K00858	ppnK, NADK; NAD+ kinase [EC:2.7.1.23]	3.8317	0.821137	0.992945	-0.0669075
K09003	K09003; uncharacterized protein	2.9408	0.945448	0.992945	-0.0231965
K01872	AARS, alaS; alanyl-tRNA synthetase [EC:6.1.1.7]	3.82946	0.821053	0.992945	-0.0670602
K21029	moeB; molybdopterin-synthase adenylyltransferase [EC:2.7.7.80]	3.08605	0.549116	0.992945	0.208165
K03531	ftsZ; cell division protein FtsZ	2.94231	0.732005	0.992945	0.119008
K01652	E2.2.1.6L, ilvB, ilvG, ilvI; acetolactate synthase I/II/III large subunit [EC:2.2.1.6]	2.74527	0.85301	0.992945	0.0663195
K04483	radA; DNA repair protein RadA	3.16133	0.59646	0.992945	0.180053
K06932	tiaS; tRNA(Ile2)-agmatinylcytidine synthase [EC:6.3.4.22]	2.02706	0.925653	0.992945	0.038291
K06942	ychF; ribosome-binding ATPase	3.0157	0.945451	0.992945	0.0231007
K00763	pncB, NAPRT1; nicotinate phosphoribosyltransferase [EC:6.3.4.21]	2.02739	0.688227	0.992945	-0.15942
K00311	ETFDH; electron-transferring-flavoprotein dehydrogenase [EC:1.5.5.1]	2.96645	0.982258	0.992945	-0.00751964
K01647	CS, gltA; citrate synthase [EC:2.3.3.1]	2.00262	0.969727	0.992945	0.0155992
K08281	pncA; nicotinamidase/pyrazinamidase [EC:3.5.1.19 3.5.1.-]	2.12672	0.373841	0.992945	-0.337772
K00809	DHPS, dys; deoxyhypusine synthase [EC:2.5.1.46]	2.99145	0.981242	0.992945	0.00793531
K00820	glmS, GFPT; glutamine---fructose-6-phosphate transaminase (isomerizing) [EC:2.6.1.16]	3.70558	0.94386	0.992945	-0.0213937
K00008	SORD, gutB; L-iditol 2-dehydrogenase [EC:1.1.1.14]	2.59565	0.739691	0.992945	0.12367
K04801	rfcS; replication factor C small subunit	3.09077	0.428907	0.992945	-0.252675
K01881	PARS, proS; prolyl-tRNA synthetase [EC:6.1.1.15]	2.02706	0.925731	0.992945	0.0382906
K15865	CDKAL1; threonylcarbamoyladenosine tRNA methylthiotransferase CDKAL1 [EC:2.8.4.5]	2.05139	0.520167	0.992945	0.274476
K00001	E1.1.1.1, adh; alcohol dehydrogenase [EC:1.1.1.1]	3.06398	0.875263	0.992945	0.0531263
K06930	bat; HTH-type transcriptional regulator, bacterioopsin transcriptional activator and related proteins	2.02378	0.558745	0.992945	0.252516
K00331	nuoB; NADH-quinone oxidoreductase subunit B [EC:7.1.1.2]	3.09196	0.546493	0.992945	0.208533
K00333	nuoD; NADH-quinone oxidoreductase subunit D [EC:7.1.1.2]	2.00292	0.969663	0.992945	0.0156326
K00782	lldG; L-lactate dehydrogenase complex protein LldG	2.74184	0.410291	0.992945	0.307374
K06966	ppnN; pyrimidine/purine-5'-nucleotide nucleosidase [EC:3.2.2.10 3.2.2.-]	2.00265	0.646416	0.992945	-0.182801
K01262	pepP; Xaa-Pro aminopeptidase [EC:3.4.11.9]	2.37113	0.421149	0.992945	0.323523
K01875	SARS, serS; seryl-tRNA synthetase [EC:6.1.1.11]	2.00274	0.832515	0.992945	-0.085577
K03564	BCP, PRXQ, DOT5; thioredoxin-dependent peroxiredoxin [EC:1.11.1.24]	2.71825	0.619399	0.992945	-0.171764
K00558	DNMT1, dcm; DNA (cytosine-5)-methyltransferase 1 [EC:2.1.1.37]	2.05199	0.882468	0.992945	0.0606849
K01011	TST, MPST, sseA; thiosulfate/3-mercaptopyruvate sulfurtransferase [EC:2.8.1.1 2.8.1.2]	2.81724	0.761257	0.992945	-0.103827
K08979	K08979; putative membrane protein	2.00249	0.969756	0.992945	0.0155846
K03177	truB, PUS4, TRUB1; tRNA pseudouridine55 synthase [EC:5.4.99.25]	2.89237	0.871928	0.992945	-0.0548263
K07041	K07041; uncharacterized protein	3.04084	0.909426	0.992945	0.0383094
K03170	topG, rgy; reverse gyrase [EC:5.6.2.2 5.6.2.-]	2.02749	0.925563	0.992945	0.0383388
K04796	RUXX; small nuclear ribonucleoprotein	2.89201	0.964086	0.992945	0.0154779
K01955	carB, CPA2; carbamoyl-phosphate synthase large subunit [EC:6.3.5.5]	2.27486	0.583153	0.992945	-0.206448
K10536	aguA; agmatine deiminase [EC:3.5.3.12]	2.62093	0.485595	0.992945	-0.242884
K03168	topA; DNA topoisomerase I [EC:5.6.2.1]	2.37406	0.572826	0.992945	-0.206926
K00759	APRT, apt; adenine phosphoribosyltransferase [EC:2.4.2.7]	3.95554	0.97964	0.992945	-0.00750367
K14564	NOP56; nucleolar protein 56	2.00256	0.96974	0.992945	0.0155928
K04795	flpA; fibrillarin-like pre-rRNA processing protein	2.00274	0.969701	0.992945	0.0156128
K01649	leuA, IMS; 2-isopropylmalate synthase [EC:2.3.3.13]	5.04322	0.843156	0.992945	-0.0515389
K03529	smc; chromosome segregation protein	2.91624	0.355159	0.992945	-0.303318
K02003	ABC.CD.A; putative ABC transport system ATP-binding protein	2.91664	0.613954	0.992945	0.177904
K07055	TRM12, TYW2; tRNA wybutosine-synthesizing protein 2 [EC:2.5.1.114]	2.74439	0.65344	0.992945	-0.154348
K09141	K09141; uncharacterized protein	2.00292	0.969663	0.992945	0.0156326
K12234	cofE; coenzyme F420-0:L-glutamate ligase / coenzyme F420-1:gamma-L-glutamate ligase [EC:6.3.2.31 6.3.2.34]	2.29782	0.508796	0.992945	0.267017
K04768	acuC; acetoin utilization protein AcuC	2.02731	0.9256	0.992945	0.038319
K01950	E6.3.5.1, NADSYN1, QNS1, nadE; NAD+ synthase (glutamine-hydrolysing) [EC:6.3.5.1]	2.79166	0.724926	0.992945	-0.120587
K00525	E1.17.4.1A, nrdA, nrdE; ribonucleoside-diphosphate reductase alpha chain [EC:1.17.4.1]	2.74584	0.816444	0.992945	-0.0829163
K01990	ABC-2.A; ABC-2 type transport system ATP-binding protein	8.02809	0.984506	0.992945	-0.00418444
K01992	ABC-2.P; ABC-2 type transport system permease protein	7.28543	0.719788	0.992945	-0.0801729
K02992	RP-S7, MRPS7, rpsG; small subunit ribosomal protein S7	2.00292	0.969663	0.992945	0.0156326
K07005	K07005; uncharacterized protein	2.42297	0.368751	0.992945	0.360304
K00721	DPM1; dolichol-phosphate mannosyltransferase [EC:2.4.1.83]	2.37277	0.565113	0.992945	0.227063
K06863	purP; 5-formaminoimidazole-4-carboxamide-1-(beta)-D-ribofuranosyl 5'-monophosphate synthetase [EC:6.3.4.23]	3.04145	0.909317	0.992945	0.0383578
K07731	K07731; putative transcriptional regulator	2.00292	0.969663	0.992945	0.0156326
K13525	VCP, CDC48; transitional endoplasmic reticulum ATPase	4.00534	0.903141	0.992945	-0.0354256
K00088	IMPDH, guaB; IMP dehydrogenase [EC:1.1.1.205]	2.00249	0.969756	0.992945	0.0155846
K02037	pstC; phosphate transport system permease protein	2.76893	0.689046	0.992945	-0.137288
K07466	RFA1, RPA1, rpa; replication factor A1	2.57297	0.557849	0.992945	-0.206592
K03120	TBP, tbp; transcription initiation factor TFIID TATA-box-binding protein	2.05183	0.731803	0.992945	-0.136362
K02257	COX10, ctaB, cyoE; heme o synthase [EC:2.5.1.141]	2.84194	0.644151	0.992945	-0.156245
K01170	endA; tRNA-intron endonuclease, archaea type [EC:4.6.1.16]	2.94188	0.94558	0.992945	-0.0231065
K03265	ETF1, ERF1; peptide chain release factor subunit 1	2.00256	0.96974	0.992945	0.0155928
K06865	K06865; ATPase	2.91726	0.908903	0.992945	-0.0388686
K00845	glk; glucokinase [EC:2.7.1.2]	2.07623	0.839983	0.992945	0.0826603
K01733	thrC; threonine synthase [EC:4.2.3.1]	3.41622	0.34553	0.992945	-0.288949
K10726	mcm; replicative DNA helicase Mcm [EC:5.6.2.3]	5.4135	0.656642	0.992945	-0.180095
K03726	helS; ATP-dependent DNA helicase [EC:5.6.2.4]	2.20013	0.803125	0.992945	-0.0965686
K06877	K06877; DEAD/DEAH box helicase domain-containing protein	2.02712	0.925641	0.992945	0.0382973
K01696	trpB; tryptophan synthase beta chain [EC:4.2.1.20]	2.79186	0.624363	0.992945	0.176675
K01883	CARS, cysS; cysteinyl-tRNA synthetase [EC:6.1.1.16]	2.00315	0.969616	0.992945	0.0156574
K02118	ATPVB, ntpB, atpB; V/A-type H+/Na+-transporting ATPase subunit B	2.02724	0.877052	0.992945	-0.0624258
K22447	cct, ths; archaeal chaperonin	3.33845	0.53133	0.992945	0.208333
K00033	PGD, gnd, gntZ; 6-phosphogluconate dehydrogenase [EC:1.1.1.44 1.1.1.343]	2.00249	0.969756	0.992945	0.0155846
K00571	E2.1.1.72; site-specific DNA-methyltransferase (adenine-specific) [EC:2.1.1.72]	2.151	0.722259	0.992945	0.146874
K01873	VARS, valS; valyl-tRNA synthetase [EC:6.1.1.9]	2.0026	0.969732	0.992945	0.0155969
K14415	RTCB, rtcB; tRNA-splicing ligase RtcB (3'-phosphate/5'-hydroxy nucleic acid ligase) [EC:6.5.1.8]	2.20167	0.340871	0.992945	-0.354437
K03750	moeA; molybdopterin molybdotransferase [EC:2.10.1.1]	2.54904	0.370861	0.992945	0.353058
K15449	TYW1; tRNA wybutosine-synthesizing protein 1 [EC:4.1.3.44]	2.00299	0.832749	0.992945	-0.0854587
K03041	rpoA1; DNA-directed RNA polymerase subunit A' [EC:2.7.7.6]	2.02699	0.925668	0.992945	0.0382828
K01916	nadE; NAD+ synthase [EC:6.3.1.5]	2.003	0.969678	0.992945	0.0156415
K09717	K09717; uncharacterized protein	2.91749	0.927143	0.992945	0.0313761
K17758	nnrD; ADP-dependent NAD(P)H-hydrate dehydratase [EC:4.2.1.136]	2.89196	0.800434	0.992945	0.0880337
K00012	UGDH, ugd; UDPglucose 6-dehydrogenase [EC:1.1.1.22]	2.07672	0.597602	0.992945	-0.206653
K02275	coxB, ctaC; cytochrome c oxidase subunit II [EC:7.1.1.9]	3.13519	0.767636	0.992945	-0.0986837
K01469	OPLAH, OXP1, oplAH; 5-oxoprolinase (ATP-hydrolysing) [EC:3.5.2.9]	2.02703	0.733776	0.992945	0.143219
K02016	ABC.FEV.S; iron complex transport system substrate-binding protein	3.43383	0.365924	0.992945	-0.275453
K03671	trxA; thioredoxin 1	2.96595	0.528896	0.992945	-0.207105
K03497	parB, spo0J; ParB family transcriptional regulator, chromosome partitioning protein	2.74296	0.654768	0.992945	-0.154416
K21636	nrdD; ribonucleoside-triphosphate reductase (formate) [EC:1.1.98.6]	2.34906	0.537197	0.992945	-0.227139
K06174	ABCE1, Rli1; ATP-binding cassette, sub-family E, member 1	2.05231	0.882168	0.992945	0.0607208
K01937	pyrG, CTPS; CTP synthase [EC:6.3.4.2]	2.00249	0.969756	0.992945	0.0155846
K07463	K07463; archaea-specific RecJ-like exonuclease	2.02749	0.925563	0.992945	0.0383388
K03044	rpoB1; DNA-directed RNA polymerase subunit B' [EC:2.7.7.6]	2.00274	0.969701	0.992945	0.0156128
K05568	mnhD, mrpD; multicomponent Na+:H+ antiporter subunit D	2.07792	0.839621	0.992945	0.0828496
K01893	NARS, asnS; asparaginyl-tRNA synthetase [EC:6.1.1.22]	2.91731	0.908914	0.992945	-0.0388641
K00789	metK, MAT; S-adenosylmethionine synthetase [EC:2.5.1.6]	2.00249	0.969756	0.992945	0.0155846
K07739	ELP3, KAT9; elongator complex protein 3 (tRNA uridine(34) acetyltransferase) [EC:2.3.1.-]	2.05156	0.882323	0.992945	0.0606371
K03166	top6A; DNA topoisomerase VI subunit A [EC:5.6.2.2]	2.00249	0.969756	0.992945	0.0155846
K03433	psmB, prcB; proteasome beta subunit [EC:3.4.25.1]	3.01658	0.94505	0.992945	0.023237
K15635	apgM; 2,3-bisphosphoglycerate-independent phosphoglycerate mutase [EC:5.4.2.12]	2.00274	0.969701	0.992945	0.0156128
K00772	mtaP, MTAP; 5'-methylthioadenosine phosphorylase [EC:2.4.2.28]	2.02885	0.925501	0.992945	0.0384991
K03636	moaD, cysO; sulfur-carrier protein	3.97775	0.852006	0.992945	0.0562275
K07577	K07577; putative mRNA 3-end processing factor	3.01559	0.785768	0.992945	0.0927865
K02058	ABC.SS.S; simple sugar transport system substrate-binding protein	2.89107	0.383084	0.992945	0.318424
K07151	STT3; dolichyl-diphosphooligosaccharide---protein glycosyltransferase [EC:2.4.99.18]	2.05342	0.882058	0.992945	0.0608464
K18882	priL, pri2, priB; DNA primase large subunit	2.02721	0.877353	0.992945	-0.0623399
K07108	K07108; uncharacterized protein	3.58443	0.781241	0.992945	-0.0848566
K06885	K06885; uncharacterized protein	2.07728	0.440984	0.992945	-0.296895
K00467	E1.13.12.4; lactate 2-monooxygenase [EC:1.13.12.4]	3.35656	0.510735	0.992945	0.221065
K00817	hisC; histidinol-phosphate aminotransferase [EC:2.6.1.9]	2.20068	0.626928	0.992945	-0.185273
K02906	RP-L3, MRPL3, rplC; large subunit ribosomal protein L3	2.00249	0.969756	0.992945	0.0155846
K04566	lysK; lysyl-tRNA synthetase, class I [EC:6.1.1.6]	2.00249	0.969756	0.992945	0.0155846
K01880	GARS, glyS1; glycyl-tRNA synthetase [EC:6.1.1.14]	2.02749	0.925563	0.992945	0.0383388
K00666	K00666; fatty-acyl-CoA synthase [EC:6.2.1.-]	2.12558	0.862079	0.992945	-0.0689206
K00812	aspB; aspartate aminotransferase [EC:2.6.1.1]	2.99217	0.562686	0.992945	-0.190694
K01892	HARS, hisS; histidyl-tRNA synthetase [EC:6.1.1.21]	2.10257	0.79794	0.992945	0.104536
K02119	ATPVC, ntpC, atpC; V/A-type H+/Na+-transporting ATPase subunit C	2.00258	0.832633	0.992945	-0.085425
K00784	rnz; ribonuclease Z [EC:3.1.26.11]	2.86644	0.532199	0.992945	0.223947
K00341	nuoL; NADH-quinone oxidoreductase subunit L [EC:7.1.1.2]	2.20171	0.642937	0.992945	0.188232
K01681	ACO, acnA; aconitate hydratase [EC:4.2.1.3]	2.02706	0.925653	0.992945	0.038291
K13566	NIT2, yafV; omega-amidase [EC:3.5.1.3]	2.71694	0.774086	0.992945	-0.100068
K01464	DPYS, dht, hydA; dihydropyrimidinase [EC:3.5.2.2]	2.07734	0.839906	0.992945	0.082786
K01874	MARS, metG; methionyl-tRNA synthetase [EC:6.1.1.10]	2.71785	0.618214	0.992945	-0.171794
K05827	lysX; [lysine-biosynthesis-protein LysW]---L-2-aminoadipate ligase [EC:6.3.2.43]	2.76885	0.849691	0.992945	-0.0658917
K09120	K09120; uncharacterized protein	2.00292	0.969663	0.992945	0.0156326
K09014	sufB; Fe-S cluster assembly protein SufB	3.04282	0.909275	0.992945	0.0384716
K00765	hisG; ATP phosphoribosyltransferase [EC:2.4.2.17]	2.02731	0.9256	0.992945	0.038319
K13787	idsA; geranylgeranyl diphosphate synthase, type I [EC:2.5.1.1 2.5.1.10 2.5.1.29]	2.54696	0.52559	0.992945	-0.22549
K03724	lhr; ATP-dependent helicase Lhr and Lhr-like helicase [EC:3.6.4.13 5.6.2.4]	2.02715	0.688319	0.992945	-0.159542
K03619	hyaE; hydrogenase-1 operon protein HyaE	2.59241	0.442196	0.992945	0.295553
K03574	mutT, NUDT15, MTH2; 8-oxo-dGTP diphosphatase [EC:3.6.1.55]	3.03905	0.472687	0.992945	0.252714
K01890	FARSB, pheT; phenylalanyl-tRNA synthetase beta chain [EC:6.1.1.20]	2.39693	0.951863	0.992945	-0.0226695
K00826	E2.6.1.42, ilvE; branched-chain amino acid aminotransferase [EC:2.6.1.42]	2.00249	0.969756	0.992945	0.0155846
K02123	ATPVI, ntpI, atpI; V/A-type H+/Na+-transporting ATPase subunit I	2.02719	0.925626	0.992945	0.0383055
K03521	fixA, etfB; electron transfer flavoprotein beta subunit	3.40908	0.456035	0.992945	0.247594
K01912	paaK; phenylacetate-CoA ligase [EC:6.2.1.30]	2.12324	0.533618	0.992945	-0.25123
K04070	pflX; putative pyruvate formate lyase activating enzyme [EC:1.97.1.4]	2.02706	0.925653	0.992945	0.038291
K01512	acyP; acylphosphatase [EC:3.6.1.7]	3.2876	0.460989	0.992945	0.249263
K10747	LIG1; DNA ligase 1 [EC:6.5.1.1 6.5.1.6 6.5.1.7]	3.55972	0.493142	0.992945	-0.206805
K00104	glcD; glycolate dehydrogenase FAD-linked subunit [EC:1.1.99.14]	2.54491	0.366111	0.992945	0.352599
K15987	hppA; K(+)-stimulated pyrophosphate-energized sodium pump [EC:7.1.3.2]	2.00256	0.96974	0.992945	0.0155928
K02323	polB; DNA polymerase II small subunit [EC:2.7.7.7]	2.02758	0.68809	0.992945	-0.159494
K00261	GLUD1_2, gdhA; glutamate dehydrogenase (NAD(P)+) [EC:1.4.1.3]	2.22481	0.667164	0.992945	-0.163615
K01736	aroC; chorismate synthase [EC:4.2.3.5]	2.05224	0.882182	0.992945	0.0607132
K01870	IARS, ileS; isoleucyl-tRNA synthetase [EC:6.1.1.5]	2.07629	0.965692	0.992945	-0.0172949
K02316	dnaG; DNA primase [EC:2.7.7.101]	2.05142	0.692662	0.992945	0.165214
K06206	sfsA; sugar fermentation stimulation protein A	2.02777	0.925739	0.992945	0.0383728
K09013	sufC; Fe-S cluster assembly ATP-binding protein	2.103	0.797857	0.992945	0.104584
K03622	ssh10b; archaea-specific DNA-binding protein	3.01728	0.945173	0.992945	0.0232981
K07402	xdhC; xanthine dehydrogenase accessory factor	2.17402	0.762696	0.992945	-0.117919
K06883	K06883; uncharacterized protein	2.44611	0.855764	0.992945	-0.0673118
K08482	kaiC; circadian clock protein KaiC	2.20174	0.472498	0.992945	-0.27065
K01494	dcd; dCTP deaminase [EC:3.5.4.13]	2.3968	0.463249	0.992945	-0.266041
K10725	cdc6A; archaeal cell division control protein 6	2.94181	0.945607	0.992945	-0.0231127
K11645	fbaB; fructose-bisphosphate aldolase, class I [EC:4.1.2.13]	2.96688	0.982327	0.992945	-0.00748484
K13038	coaBC, dfp; phosphopantothenoylcysteine decarboxylase / phosphopantothenate---cysteine ligase [EC:4.1.1.36 6.3.2.5]	2.07606	0.840149	0.992945	0.0826402
K01515	nudF; ADP-ribose pyrophosphatase [EC:3.6.1.13 3.6.1.-]	2.27697	0.581575	0.992945	-0.206401
K01802	E5.2.1.8; peptidylprolyl isomerase [EC:5.2.1.8]	2.00292	0.969663	0.992945	0.0156326
K09735	dpck; GTP-dependent dephospho-CoA kinase [EC:2.7.1.237]	2.62166	0.484826	0.992945	-0.242815
K03183	ubiE; demethylmenaquinone methyltransferase / 2-methoxy-6-polyprenyl-1,4-benzoquinol methylase [EC:2.1.1.163 2.1.1.201]	2.02851	0.68881	0.992945	-0.159661
K00943	tmk, DTYMK; dTMP kinase [EC:2.7.4.9]	2.81785	0.92441	0.992945	-0.032829
K00436	hoxH; NAD-reducing hydrogenase large subunit [EC:1.12.1.2]	2.32143	0.345615	0.992945	0.387435
K01689	ENO, eno; enolase [EC:4.2.1.11]	2.37168	0.420175	0.992945	0.323583
K01710	rfbB, rmlB, rffG; dTDP-glucose 4,6-dehydratase [EC:4.2.1.46]	2.02772	0.925516	0.992945	0.0383635
K02548	menA; 1,4-dihydroxy-2-naphthoate polyprenyltransferase [EC:2.5.1.74]	2.05185	0.731711	0.992945	-0.13627
K03637	moaC, CNX3; cyclic pyranopterin monophosphate synthase [EC:4.6.1.17]	2.00249	0.969756	0.992945	0.0155846
K04802	PCNA; proliferating cell nuclear antigen	2.05181	0.882393	0.992945	0.0606653
K02437	gcvH, GCSH; glycine cleavage system H protein	2.74224	0.978691	0.992945	-0.00939714
K03465	thyX, thy1; thymidylate synthase (FAD) [EC:2.1.1.148]	2.0271	0.925618	0.992945	0.0383862
K01703	leuC, IPMI-L; 3-isopropylmalate/(R)-2-methylmalate dehydratase large subunit [EC:4.2.1.33 4.2.1.35]	2.00256	0.832832	0.992945	-0.0855085
K00762	pyrE; orotate phosphoribosyltransferase [EC:2.4.2.10]	2.00249	0.969756	0.992945	0.0155846
K03110	ftsY; fused signal recognition particle receptor	2.00249	0.969756	0.992945	0.0155846
K00952	nadM; nicotinamide-nucleotide adenylyltransferase [EC:2.7.7.1]	2.00292	0.969663	0.992945	0.0156326
K02493	hemK, prmC, HEMK; release factor glutamine methyltransferase [EC:2.1.1.297]	2.10322	0.79822	0.992945	0.104614
K04069	pflA, pflC, pflE; pyruvate formate lyase activating enzyme [EC:1.97.1.4]	3.01575	0.786217	0.992945	0.0928007
K00640	cysE; serine O-acetyltransferase [EC:2.3.1.30]	2.00292	0.83238	0.992945	-0.0855558
K00175	korB, oorB, oforB; 2-oxoglutarate/2-oxoacid ferredoxin oxidoreductase subunit beta [EC:1.2.7.3 1.2.7.11]	2.05188	0.882257	0.992945	0.0606731
K04043	dnaK, HSPA9; molecular chaperone DnaK	2.05145	0.882408	0.992945	0.0607146
K03686	dnaJ; molecular chaperone DnaJ	2.15042	0.720721	0.992945	0.146799
K21929	udg; uracil-DNA glycosylase [EC:3.2.2.27]	2.49743	0.888087	0.992945	0.0524715
K00052	leuB, IMDH; 3-isopropylmalate dehydrogenase [EC:1.1.1.85]	2.91724	0.908756	0.992945	-0.03887
K01814	hisA; phosphoribosylformimino-5-aminoimidazole carboxamide ribotide isomerase [EC:5.3.1.16]	2.12645	0.757814	0.992945	0.125822
K07033	K07033; uncharacterized protein	2.2285	0.845655	0.992945	-0.0754475
K02038	pstA; phosphate transport system permease protein	2.91681	0.90867	0.992945	-0.0389052
K02036	pstB; phosphate transport system ATP-binding protein [EC:7.3.2.1]	2.003	0.969648	0.992945	0.0156407
K01090	E3.1.3.16; protein phosphatase [EC:3.1.3.16]	2.00282	0.83307	0.992945	-0.0853873
K00058	serA, PHGDH; D-3-phosphoglycerate dehydrogenase / 2-oxoglutarate reductase [EC:1.1.1.95 1.1.1.399]	2.56838	0.425802	0.992945	-0.280216
K01934	MTHFS; 5-formyltetrahydrofolate cyclo-ligase [EC:6.3.3.2]	2.22667	0.667426	0.992945	-0.1635
K11717	sufS; cysteine desulfurase / selenocysteine lyase [EC:2.8.1.7 4.4.1.16]	2.02815	0.925425	0.992945	0.0384114
K06937	K06937; glycerol dibiphytanyl glycerol tetraether/macrocyclic archaeol synthase	2.00285	0.970133	0.992945	0.01544
K01409	OSGEP, KAE1, QRI7; N6-L-threonylcarbamoyladenine synthase [EC:2.3.1.234]	2.00249	0.969756	0.992945	0.0155846
K11600	RRP41, EXOSC4, SKI6; exosome complex component RRP41	2.02719	0.925626	0.992945	0.0383055
K00053	ilvC; ketol-acid reductoisomerase [EC:1.1.1.86]	2.00263	0.832665	0.992945	-0.0854999
K01465	URA4, pyrC; dihydroorotase [EC:3.5.2.3]	2.12757	0.757576	0.992945	0.125945
K06945	K06945; uncharacterized protein	2.15085	0.904024	0.992945	-0.0475272
K10773	NTH; endonuclease III [EC:4.2.99.18]	2.32133	0.477536	0.992945	0.286007
K01101	E3.1.3.41; 4-nitrophenyl phosphatase [EC:3.1.3.41]	2.05172	0.921663	0.992945	-0.0396485
K10907	K10907; aminotransferase [EC:2.6.1.-]	2.07645	0.839772	0.992945	0.0826859
K22187	xylA; alpha-ketoglutaric semialdehyde dehydrogenase [EC:1.2.1.-]	2.02706	0.925731	0.992945	0.0382906
K03892	arsR; ArsR family transcriptional regulator, arsenate/arsenite/antimonite-responsive transcriptional repressor	2.49851	0.888153	0.992945	0.0529287
K00332	nuoC; NADH-quinone oxidoreductase subunit C [EC:7.1.1.2]	2.05292	0.692392	0.992945	0.165384
K00174	korA, oorA, oforA; 2-oxoglutarate/2-oxoacid ferredoxin oxidoreductase subunit alpha [EC:1.2.7.3 1.2.7.11]	2.05163	0.882308	0.992945	0.0606452
K00632	fadA, fadI; acetyl-CoA acyltransferase [EC:2.3.1.16]	2.05315	0.730739	0.992945	-0.136481
K13378	nuoCD; NADH-quinone oxidoreductase subunit C/D [EC:7.1.1.2]	2.96688	0.855126	0.992945	0.0624677
K11131	DKC1, NOLA4, CBF5; H/ACA ribonucleoprotein complex subunit 4 [EC:5.4.99.-]	3.88133	0.88464	0.992945	-0.0428456
K00364	guaC, GMPR; GMP reductase [EC:1.7.1.7]	2.00249	0.969756	0.992945	0.0155846
K07050	AARSD1, ALAX; misacylated tRNA(Ala) deacylase [EC:3.1.1.-]	2.9908	0.98138	0.992945	0.00788259
K17759	NAXE, nnrE; NAD(P)H-hydrate epimerase [EC:5.1.99.6]	2.89196	0.800434	0.992945	0.0880337
K03045	rpoB2; DNA-directed RNA polymerase subunit B" [EC:2.7.7.6]	2.00274	0.969701	0.992945	0.0156128
K07335	bmpA, bmpB, tmpC; basic membrane protein A and related proteins	2.66847	0.363602	0.992945	0.345637
K22206	thiR; XRE family transcriptional regulator, thiamine biosynthesis regulator	3.55986	0.749	0.992945	-0.0979041
K14187	tyrA; chorismate mutase / prephenate dehydrogenase [EC:5.4.99.5 1.3.1.12]	3.7332	0.455795	0.992945	-0.219381
K08678	UXS1, uxs; UDP-glucuronate decarboxylase [EC:4.1.1.35]	2.00249	0.969756	0.992945	0.0155846
K21219	thiDN; hydroxymethylpyrimidine kinase / phosphomethylpyrimidine kinase / thiamine-phosphate diphosphorylase [EC:2.7.1.49 2.7.4.7 2.5.1.3]	2.02756	0.688101	0.992945	-0.159488
K14170	pheA; chorismate mutase / prephenate dehydratase [EC:5.4.99.5 4.2.1.51]	2.44958	0.396592	0.992945	-0.302151
K14656	ribL; FAD synthetase [EC:2.7.7.2]	2.10123	0.798199	0.992945	0.10439
K21147	moeZR, moeBR; sulfur-carrier protein adenylyltransferase/sulfurtransferase [EC:2.7.7.80 2.7.7.- 2.8.1.11 2.8.1.-]	3.6314	0.70823	0.992945	-0.113634
K06269	PPP1C; serine/threonine-protein phosphatase PP1 catalytic subunit [EC:3.1.3.16]	2.00282	0.83307	0.992945	-0.0853873
K15904	kae1-bud32; bifunctional N6-L-threonylcarbamoyladenine synthase / protein kinase Bud32 [EC:2.3.1.234 2.7.11.1]	2.99145	0.981242	0.992945	0.00793531
K00262	E1.4.1.4, gdhA; glutamate dehydrogenase (NADP+) [EC:1.4.1.4]	2.22481	0.667164	0.992945	-0.163615
K22172	fqoBC; F420H2:quinone oxidoreductase subunit B/C [EC:1.1.98.4]	2.96688	0.855126	0.992945	0.0624677
K13798	rpoB; DNA-directed RNA polymerase subunit B [EC:2.7.7.6]	2.00274	0.969701	0.992945	0.0156128
K01273	DPEP; membrane dipeptidase [EC:3.4.13.19]	2.10195	0.990739	0.995167	0.00466957
K07500	K07500; DNA endonuclease	3.97913	0.992347	0.995167	0.00478811
K02274	coxA, ctaD; cytochrome c oxidase subunit I [EC:7.1.1.9]	2.64274	0.996204	0.996204	-0.00171385
K09128	acnX2; mevalonate 5-phosphate dehydratase small subunit [EC:4.2.1.-]	1.40802	0.51247	NA	-0.306199
K09142	SPOUT1; methyltransferase [EC:2.1.1.-]	1.87785	0.598962	NA	0.232272
K00872	thrB; homoserine kinase [EC:2.7.1.39]	1.90249	0.561591	NA	0.255721
K03924	moxR; MoxR-like ATPase [EC:3.6.3.-]	1.8778	0.993841	NA	0.00327516
K01889	FARSA, pheS; phenylalanyl-tRNA synthetase alpha chain [EC:6.1.1.20]	1.9527	0.940141	NA	-0.0310044
K00248	ACADS, bcd; butyryl-CoA dehydrogenase [EC:1.3.8.1]	1.51063	0.221977	NA	-0.535122
K01869	LARS, leuS; leucyl-tRNA synthetase [EC:6.1.1.4]	1.95335	0.940287	NA	-0.03093
K19074	csa2; CRISPR-associated protein Csa2	1.38368	0.892713	NA	-0.0660957
K19089	cas5a_b_c; CRISPR-associated protein Cas5a/b/c	1.43318	0.999199	NA	-0.00049023
K00074	paaH, hbd, fadB, mmgB; 3-hydroxybutyryl-CoA dehydrogenase [EC:1.1.1.157]	1.28614	0.106379	NA	-0.749543
K00661	maa; maltose O-acetyltransferase [EC:2.3.1.79]	1.73075	0.72603	NA	-0.151208
K09482	gatD; glutamyl-tRNA(Gln) amidotransferase subunit D [EC:6.3.5.7]	1.90383	0.849214	NA	-0.0790396
K01641	HMGCS; hydroxymethylglutaryl-CoA synthase [EC:2.3.3.10]	1.97774	0.788058	NA	-0.108981
K03047	rpoD; DNA-directed RNA polymerase subunit D [EC:2.7.7.6]	1.95292	0.94019	NA	-0.0309791
K02883	RP-L18e, RPL18; large subunit ribosomal protein L18e	1.95292	0.94019	NA	-0.0309791
K02871	RP-L13, MRPL13, rplM; large subunit ribosomal protein L13	1.95292	0.94019	NA	-0.0309791
K02946	RP-S10, MRPS10, rpsJ; small subunit ribosomal protein S10	1.97792	0.985496	NA	-0.00748523
K06176	truD, PUS7; tRNA pseudouridine13 synthase [EC:5.4.99.27]	1.97792	0.985496	NA	-0.00748523
K01622	K01622; fructose 1,6-bisphosphate aldolase/phosphatase [EC:4.1.2.13 3.1.3.11]	1.92878	0.894784	NA	-0.054762
K03498	trkH, trkG, ktrB, ktrD; trk/ktr system potassium uptake protein	1.97815	0.98556	NA	-0.00745991
K00927	PGK, pgk; phosphoglycerate kinase [EC:2.7.2.3]	1.95335	0.858363	NA	0.0750982
K01560	E3.8.1.2; 2-haloacid dehalogenase [EC:3.8.1.2]	1.23669	0.0736342	NA	-0.834875
K02996	RP-S9, MRPS9, rpsI; small subunit ribosomal protein S9	1.95292	0.94019	NA	-0.0309791
K03058	rpoN; DNA-directed RNA polymerase subunit N [EC:2.7.7.6]	1.97792	0.985496	NA	-0.00748523
K02967	RP-S2, MRPS2, rpsB; small subunit ribosomal protein S2	1.95324	0.940262	NA	-0.0309426
K00869	MVK, mvaK1; mevalonate kinase [EC:2.7.1.36]	1.92792	0.705206	NA	0.162583
K02890	RP-L22, MRPL22, rplV; large subunit ribosomal protein L22	1.97792	0.985496	NA	-0.00748523
K07060	nob1; endoribonuclease Nob1 [EC:3.1.-.-]	1.92878	0.894784	NA	-0.054762
K01903	sucC; succinyl-CoA synthetase beta subunit [EC:6.2.1.5]	2.00206	0.969881	NA	0.0155357
K03146	THI4, THI1; cysteine-dependent adenosine diphosphate thiazole synthase [EC:2.4.2.60]	1.90267	0.65719	NA	-0.181961
K05710	hcaC; 3-phenylpropionate/trans-cinnamate dioxygenase ferredoxin component	1.90142	0.657224	NA	-0.181929
K03242	EIF2S3; translation initiation factor 2 subunit 3	1.97684	0.815461	NA	0.0980425
K07558	K07558, cca; tRNA nucleotidyltransferase (CCA-adding enzyme) [EC:2.7.7.72]	1.95292	0.94019	NA	-0.0309791
K07176	K07176; putative serine/threonine protein kinase	1.92835	0.894685	NA	-0.0548121
K02976	RP-S26e, RPS26; small subunit ribosomal protein S26e	1.97792	0.985496	NA	-0.00748523
K03442	mscS; small conductance mechanosensitive channel	1.41078	0.00023855	NA	-1.53792
K00600	glyA, SHMT; glycine hydroxymethyltransferase [EC:2.1.2.1]	1.95292	0.94019	NA	-0.0309791
K01434	pac; penicillin G amidase [EC:3.5.1.11]	1.21237	0.0293221	NA	-1.00749
K19143	csx1; CRISPR-associated protein Csx1	1.65698	0.00417458	NA	-1.13468
K02910	RP-L31e, RPL31; large subunit ribosomal protein L31e	1.36224	0.16611	NA	-0.630859
K06875	PDCD5, TFAR19; programmed cell death protein 5	1.95292	0.858308	NA	0.0750472
K17285	SELENBP1; methanethiol oxidase [EC:1.8.3.4]	1.23556	0.381409	NA	-0.429078
K06983	K06983; uncharacterized protein	1.87921	0.993331	NA	0.00354264
K01679	E4.2.1.2B, fumC, FH; fumarate hydratase, class II [EC:4.2.1.2]	1.97758	0.985771	NA	-0.00735119
K02952	RP-S13, rpsM; small subunit ribosomal protein S13	1.95292	0.858308	NA	0.0750472
K01750	E4.3.1.12, ocd; ornithine cyclodeaminase [EC:4.3.1.12]	1.4869	0.467541	NA	-0.331782
K00529	hcaD; 3-phenylpropionate/trans-cinnamate dioxygenase ferredoxin reductase component [EC:1.18.1.3]	1.60684	0.346254	NA	-0.40719
K03238	EIF2S2; translation initiation factor 2 subunit 2	1.95322	0.940257	NA	-0.0309449
K01720	prpD; 2-methylcitrate dehydratase [EC:4.2.1.79]	1.87735	0.803158	NA	-0.103921
K03136	TFIIE1, GTF2E1, TFA1, tfe; transcription initiation factor TFIIE subunit alpha	1.87876	0.803271	NA	-0.103747
K07254	atrm56; tRNA (cytidine56-2'-O)-methyltransferase [EC:2.1.1.206]	1.87876	0.803271	NA	-0.103747
K16877	hmfA; 2-furoyl-CoA dehydrogenase large subunit [EC:1.3.99.8]	1.53464	0.000528569	NA	-1.41686
K06888	K06888; uncharacterized protein	1.95262	0.940186	NA	-0.0310143
K02503	HINT1, hinT, hit; histidine triad (HIT) family protein	1.41065	0.00162327	NA	-1.33199
K02528	ksgA; 16S rRNA (adenine1518-N6/adenine1519-N6)-dimethyltransferase [EC:2.1.1.182]	1.9527	0.940141	NA	-0.0310044
K03236	EIF1A; translation initiation factor 1A	1.90335	0.747021	NA	0.139144
K07101	K07101; uncharacterized protein	1.82737	0.879091	NA	0.0661566
K05967	K05967; uncharacterized protein	2.00174	0.970018	NA	0.0154967
K18978	gapN; glyceraldehyde-3-phosphate dehydrogenase [NAD(P)+] [EC:1.2.1.90]	1.77814	0.972153	NA	0.0152497
K07161	K07161; uncharacterized protein	1.9531	0.6653	NA	0.18563
K02117	ATPVA, ntpA, atpA; V/A-type H+/Na+-transporting ATPase subunit A [EC:7.1.2.2 7.2.2.1]	1.97778	0.815252	NA	0.0980588
K02933	RP-L6, MRPL6, rplF; large subunit ribosomal protein L6	1.95292	0.94019	NA	-0.0309791
K18929	lldF; L-lactate dehydrogenase complex protein LldF	1.65477	0.42073	NA	-0.347295
K02915	RP-L34e, RPL34; large subunit ribosomal protein L34e	1.31217	0.0662983	NA	-0.83223
K03076	secY; preprotein translocase subunit SecY	1.97792	0.985496	NA	-0.00748523
K02876	RP-L15, MRPL15, rplO; large subunit ribosomal protein L15	1.95335	0.940287	NA	-0.03093
K08975	K08975; putative membrane protein	1.9527	0.940141	NA	-0.0310044
K00806	uppS; undecaprenyl diphosphate synthase [EC:2.5.1.31]	1.9527	0.940141	NA	-0.0310044
K01808	rpiB; ribose 5-phosphate isomerase B [EC:5.3.1.6]	1.8028	0.667338	NA	-0.180609
K13628	iscA; iron-sulfur cluster assembly protein	1.80328	0.667453	NA	-0.180549
K07128	K07128; uncharacterized protein	1.73067	0.538045	NA	-0.261283
K03973	pspC; phage shock protein C	1.80262	0.866146	NA	-0.0720578
K02921	RP-L37Ae, RPL37A; large subunit ribosomal protein L37Ae	1.97742	0.815159	NA	0.0981083
K02877	RP-L15e, RPL15; large subunit ribosomal protein L15e	1.95292	0.94019	NA	-0.0309791
K06947	GRC3, NOL9; polynucleotide 5'-hydroxyl-kinase GRC3/NOL9 [EC:2.7.1.-]	1.9531	0.940294	NA	-0.030959
K06131	clsA_B; cardiolipin synthase A/B [EC:2.7.8.-]	1.8555	0.961406	NA	-0.0210452
K03469	rnhA, RNASEH1; ribonuclease HI [EC:3.1.26.4]	1.95335	0.940287	NA	-0.03093
K02875	RP-L14e, RPL14; large subunit ribosomal protein L14e	1.95328	0.94027	NA	-0.0309384
K07442	TRM61, GCD14; tRNA (adenine57-N1/adenine58-N1)-methyltransferase catalytic subunit [EC:2.1.1.219 2.1.1.220]	1.92871	0.894767	NA	-0.0547706
K09759	aspC, aspS; nondiscriminating aspartyl-tRNA synthetase [EC:6.1.1.23]	1.92785	0.89457	NA	-0.0548705
K08321	lsrF; 3-hydroxy-5-phosphonooxypentane-2,4-dione thiolase [EC:2.3.1.245]	1.97792	0.985496	NA	-0.00748523
K00087	ygeS, xdhA; xanthine dehydrogenase molybdenum-binding subunit [EC:1.17.1.4]	1.65797	0.00186263	NA	-1.22473
K01091	gph; phosphoglycolate phosphatase [EC:3.1.3.18]	1.92835	0.526438	NA	0.278948
K21405	acoR; sigma-54 dependent transcriptional regulator, acetoin dehydrogenase operon transcriptional activator AcoR	1.70314	0.503636	NA	0.315048
K02896	RP-L24e, RPL24; large subunit ribosomal protein L24e	1.80462	0.924823	NA	0.0411086
K02979	RP-S28e, RPS28; small subunit ribosomal protein S28e	1.90371	0.747021	NA	0.138995
K02936	RP-L7Ae, RPL7A; large subunit ribosomal protein L7Ae	1.90371	0.747021	NA	0.138995
K03470	rnhB; ribonuclease HII [EC:3.1.26.4]	1.97767	0.815273	NA	0.0980463
K06928	NTPCR; nucleoside-triphosphatase [EC:3.6.1.15]	1.97792	0.985496	NA	-0.00748523
K03234	EEF2; elongation factor 2	1.97792	0.985496	NA	-0.00748523
K00384	trxB, TRR; thioredoxin reductase (NADPH) [EC:1.8.1.9]	1.97792	0.985511	NA	-0.00748515
K04075	tilS, mesJ; tRNA(Ile)-lysidine synthase [EC:6.3.4.19]	1.21237	0.0293221	NA	-1.00749
K00239	sdhA, frdA; succinate dehydrogenase flavoprotein subunit [EC:1.3.5.1]	2.0012	0.833067	NA	-0.0856723
K00003	hom; homoserine dehydrogenase [EC:1.1.1.3]	1.97792	0.985496	NA	-0.00748523
K02683	priS, pri1, priA; DNA primase small subunit [EC:2.7.7.102]	1.95292	0.8586	NA	0.0750496
K01597	MVD, mvaD; diphosphomevalonate decarboxylase [EC:4.1.1.33]	1.95292	0.940254	NA	-0.0309796
K02930	RP-L4e, RPL4; large subunit ribosomal protein L4e	1.97792	0.985496	NA	-0.00748523
K02892	RP-L23, MRPL23, rplW; large subunit ribosomal protein L23	1.97792	0.985496	NA	-0.00748523
K02886	RP-L2, MRPL2, rplB; large subunit ribosomal protein L2	1.97779	0.985482	NA	-0.00750002
K01251	AHCY, ahcY; adenosylhomocysteinase [EC:3.13.2.1]	1.95304	0.940281	NA	-0.0309655
K00241	sdhC, frdC; succinate dehydrogenase cytochrome b subunit	1.82803	0.913076	NA	-0.0465298
K00240	sdhB, frdB; succinate dehydrogenase iron-sulfur subunit [EC:1.3.5.1]	1.82803	0.913076	NA	-0.0465298
K11261	fwdE, fmdE; formylmethanofuran dehydrogenase subunit E [EC:1.2.7.12]	1.97958	0.0276602	NA	-0.818665
K02339	holC; DNA polymerase III subunit chi [EC:2.7.7.7]	1.75603	0.580562	NA	-0.233713
K02907	RP-L30, MRPL30, rpmD; large subunit ribosomal protein L30	1.97805	0.98554	NA	-0.00747028
K02988	RP-S5, MRPS5, rpsE; small subunit ribosomal protein S5	1.95335	0.940287	NA	-0.03093
K05964	citX; holo-ACP synthase [EC:2.7.7.61]	1.53222	0.382126	NA	-0.387414
K00796	folP; dihydropteroate synthase [EC:2.5.1.15]	1.38556	0.110429	NA	-0.713705
K00966	GMPP; mannose-1-phosphate guanylyltransferase [EC:2.7.7.13]	1.92792	0.894587	NA	-0.0548621
K07218	nosD; nitrous oxidase accessory protein	1.40859	0.34856	NA	-0.43372
K02044	phnD; phosphonate transport system substrate-binding protein	1.85285	0.757452	NA	-0.128988
K07583	PUS10; tRNA pseudouridine synthase 10 [EC:5.4.99.25]	1.97792	0.985496	NA	-0.00748523
K08153	blt; MFS transporter, DHA1 family, multidrug resistance protein	1.832	0.0348707	NA	-0.820812
K15497	wtpC; molybdate/tungstate transport system ATP-binding protein [EC:7.3.2.5 7.3.2.6]	1.85285	0.757452	NA	-0.128988
K15496	wtpB; molybdate/tungstate transport system permease protein	1.85285	0.757452	NA	-0.128988
K15495	wtpA; molybdate/tungstate transport system substrate-binding protein	1.85285	0.757452	NA	-0.128988
K03801	lipB; lipoyl(octanoyl) transferase [EC:2.3.1.181]	1.33759	0.0793545	NA	-0.791465
K03644	lipA, LIAS, LIP1, LIP5; lipoyl synthase [EC:2.8.1.8]	1.48764	0.120523	NA	-0.681513
K07104	catE; catechol 2,3-dioxygenase [EC:1.13.11.2]	1.40954	0.128705	NA	-0.676345
K09721	K09721; uncharacterized protein	1.97792	0.985496	NA	-0.00748523
K01915	glnA, GLUL; glutamine synthetase [EC:6.3.1.2]	1.87896	0.993576	NA	0.00341648
K01953	asnB, ASNS; asparagine synthase (glutamine-hydrolysing) [EC:6.3.5.4]	2.00233	0.969664	NA	0.0156483
K02500	hisF; imidazole glycerol-phosphate synthase subunit HisF [EC:4.3.2.10]	1.97792	0.985511	NA	-0.00748515
K02523	ispB; octaprenyl-diphosphate synthase [EC:2.5.1.90]	1.95335	0.940351	NA	-0.0309297
K01868	TARS, thrS; threonyl-tRNA synthetase [EC:6.1.1.3]	1.95292	0.858308	NA	0.0750472
K01939	purA, ADSS; adenylosuccinate synthase [EC:6.3.4.4]	1.97792	0.985496	NA	-0.00748523
K02991	RP-S6e, RPS6; small subunit ribosomal protein S6e	1.97767	0.985455	NA	-0.00751387
K02974	RP-S24e, RPS24; small subunit ribosomal protein S24e	1.65792	0.418466	NA	-0.346825
K07566	tsaC, rimN, SUA5, YRDC; L-threonylcarbamoyladenylate synthase [EC:2.7.7.87]	1.97792	0.985496	NA	-0.00748523
K02040	pstS; phosphate transport system substrate-binding protein	1.97792	0.985496	NA	-0.00748523
K07141	mocA; molybdenum cofactor cytidylyltransferase [EC:2.7.7.76]	1.80346	0.866161	NA	-0.0720528
K01940	argG, ASS1; argininosuccinate synthase [EC:6.3.4.5]	1.97767	0.815273	NA	0.0980463
K01803	TPI, tpiA; triosephosphate isomerase (TIM) [EC:5.3.1.1]	1.97835	0.985607	NA	-0.00743616
K07178	RIOK1; RIO kinase 1 [EC:2.7.11.1]	1.95294	0.744025	NA	-0.132758
K02995	RP-S8e, RPS8; small subunit ribosomal protein S8e	1.92792	0.902652	NA	0.0515539
K03105	SRP19; signal recognition particle subunit SRP19	1.92792	0.902652	NA	0.0515539
K02869	RP-L12, rpl12; large subunit ribosomal protein L12	1.92872	0.894771	NA	-0.0547686
K02956	RP-S15, MRPS15, rpsO; small subunit ribosomal protein S15	1.97792	0.985496	NA	-0.00748523
K02863	RP-L1, MRPL1, rplA; large subunit ribosomal protein L1	1.97749	0.815144	NA	0.0981166
K02867	RP-L11, MRPL11, rplK; large subunit ribosomal protein L11	1.95292	0.858308	NA	0.0750472
K17105	E2.5.1.42; geranylgeranylglycerol-phosphate geranylgeranyltransferase [EC:2.5.1.42]	1.95292	0.94019	NA	-0.0309791
K01619	deoC, DERA; deoxyribose-phosphate aldolase [EC:4.1.2.4]	1.36226	0.0502829	NA	-0.869494
K01006	ppdK; pyruvate, orthophosphate dikinase [EC:2.7.9.1]	1.90208	0.656979	NA	-0.181846
K11646	K11646; 3-dehydroquinate synthase II [EC:1.4.1.24]	1.97792	0.985496	NA	-0.00748523
K00014	aroE; shikimate dehydrogenase [EC:1.1.1.25]	1.97792	0.985496	NA	-0.00748523
K01658	trpG; anthranilate synthase component II [EC:4.1.3.27]	1.97699	0.62673	NA	0.20835
K01657	trpE; anthranilate synthase component I [EC:4.1.3.27]	1.92792	0.705206	NA	0.162583
K00766	trpD; anthranilate phosphoribosyltransferase [EC:2.4.2.18]	1.95258	0.940586	NA	-0.0308417
K01609	trpC; indole-3-glycerol phosphate synthase [EC:4.1.1.48]	1.90335	0.746766	NA	0.139142
K03113	EIF1, SUI1; translation initiation factor 1	1.95335	0.940287	NA	-0.03093
K03124	TFIIB, GTF2B, SUA7, tfb; transcription initiation factor TFIIB	1.97792	0.985496	NA	-0.00748523
K00313	fixC; electron transfer flavoprotein-quinone oxidoreductase [EC:1.5.5.-]	1.95292	0.94019	NA	-0.0309791
K01001	ALG7; UDP-N-acetylglucosamine--dolichyl-phosphate N-acetylglucosaminephosphotransferase [EC:2.7.8.15]	1.97792	0.985496	NA	-0.00748523
K18641	K18641; crenactin	1.9527	0.940141	NA	-0.0310044
K01695	trpA; tryptophan synthase alpha chain [EC:4.2.1.20]	1.92792	0.705206	NA	0.162583
K07045	K07045; uncharacterized protein	1.4597	0.0067024	NA	-1.14495
K02895	RP-L24, MRPL24, rplX; large subunit ribosomal protein L24	1.97792	0.985496	NA	-0.00748523
K03665	hflX; GTPase	1.95292	0.94019	NA	-0.0309791
K00412	CYTB, petB; ubiquinol-cytochrome c reductase cytochrome b subunit	1.82828	0.712266	NA	-0.154511
K09817	znuC; zinc transport system ATP-binding protein [EC:7.2.2.20]	1.90398	0.657037	NA	-0.181615
K09815	znuA; zinc transport system substrate-binding protein	1.855	0.757968	NA	-0.128724
K00117	gcd; quinoprotein glucose dehydrogenase [EC:1.1.5.2]	1.70492	0.496545	NA	-0.289442
K07073	K07073; uncharacterized protein	1.87862	0.431614	NA	0.35509
K06965	PELO, DOM34, pelA; protein pelota	1.90362	0.561563	NA	0.255481
K09903	pyrH; uridylate kinase [EC:2.7.4.22]	1.92828	0.705451	NA	0.162439
K00800	aroA; 3-phosphoshikimate 1-carboxyvinyltransferase [EC:2.5.1.19]	1.97792	0.985496	NA	-0.00748523
K04800	rfcL; replication factor C large subunit	1.95285	0.940174	NA	-0.0309874
K06953	K06953; uncharacterized protein	1.97792	0.985496	NA	-0.00748523
K01807	rpiA; ribose 5-phosphate isomerase A [EC:5.3.1.6]	1.92835	0.894685	NA	-0.0548121
K01595	ppc; phosphoenolpyruvate carboxylase [EC:4.1.1.31]	1.97792	0.985496	NA	-0.00748523
K02492	hemA; glutamyl-tRNA reductase [EC:1.2.1.70]	1.95321	0.286437	NA	-0.418074
K02866	RP-L10e, RPL10; large subunit ribosomal protein L10e	1.97792	0.985496	NA	-0.00748523
K00018	hprA; glycerate dehydrogenase [EC:1.1.1.29]	1.85391	0.757708	NA	-0.128857
K05595	marC; multiple antibiotic resistance protein	1.9527	0.940141	NA	-0.0310044
K06984	K06984; beta-ribofuranosylaminobenzene 5'-phosphate synthase [EC:2.4.2.54]	1.9526	0.858688	NA	0.0749185
K02885	RP-L19e, RPL19; large subunit ribosomal protein L19e	1.97792	0.985496	NA	-0.00748523
K00963	UGP2, galU, galF; UTP--glucose-1-phosphate uridylyltransferase [EC:2.7.7.9]	1.92792	0.894701	NA	-0.0548632
K00145	argC; N-acetyl-gamma-glutamyl-phosphate reductase [EC:1.2.1.38]	1.90382	0.849212	NA	-0.0790409
K02987	RP-S4e, RPS4; small subunit ribosomal protein S4e	1.97792	0.985496	NA	-0.00748523
K02931	RP-L5, MRPL5, rplE; large subunit ribosomal protein L5	1.97792	0.985496	NA	-0.00748523
K01885	EARS, gltX; glutamyl-tRNA synthetase [EC:6.1.1.17]	1.95285	0.665495	NA	0.185509
K00940	ndk, NME; nucleoside-diphosphate kinase [EC:2.7.4.6]	1.90371	0.747021	NA	0.138995
K00376	nosZ; nitrous-oxide reductase [EC:1.7.2.4]	1.50658	0.926254	NA	-0.0443798
K01599	hemE, UROD; uroporphyrinogen decarboxylase [EC:4.1.1.37]	1.23649	0.380746	NA	-0.428909
K22227	ahbD; AdoMet-dependent heme synthase [EC:1.3.98.6]	1.21149	0.339147	NA	-0.469606
K00980	tagD; glycerol-3-phosphate cytidylyltransferase [EC:2.7.7.39]	1.97792	0.985496	NA	-0.00748523
K17218	sqr; sulfide:quinone oxidoreductase [EC:1.8.5.4]	1.90323	0.747274	NA	0.138844
K09148	K09148; uncharacterized protein	1.95292	0.858308	NA	0.0750472
K05802	mscK, kefA, aefA; potassium-dependent mechanosensitive channel	1.9527	0.940141	NA	-0.0310044
K09022	ridA, tdcF, RIDA; 2-iminobutanoate/2-iminopropanoate deaminase [EC:3.5.99.10]	1.90469	0.849788	NA	-0.0789322
K14568	EMG1, NEP1; rRNA small subunit pseudouridine methyltransferase Nep1 [EC:2.1.1.260]	1.95292	0.94019	NA	-0.0309791
K01431	UPB1, pydC; beta-ureidopropionase [EC:3.5.1.6]	1.833	0.261151	NA	-0.45607
K00627	DLAT, aceF, pdhC; pyruvate dehydrogenase E2 component (dihydrolipoamide acetyltransferase) [EC:2.3.1.12]	1.21237	0.0293221	NA	-1.00749
K00167	BCKDHB, bkdA2; 2-oxoisovalerate dehydrogenase E1 component beta subunit [EC:1.2.4.4]	1.43578	0.000121174	NA	-1.59246
K07301	yrbG; cation:H+ antiporter	1.72977	0.538396	NA	-0.261408
K01040	gctB; glutaconate CoA-transferase, subunit B [EC:2.8.3.12]	1.41078	0.00023855	NA	-1.53792
K06869	K06869; uncharacterized protein	1.97792	0.985496	NA	-0.00748523
K00285	dadA; D-amino-acid dehydrogenase [EC:1.4.5.1]	1.87633	0.803376	NA	-0.104056
K02984	RP-S3Ae, RPS3A; small subunit ribosomal protein S3Ae	1.90335	0.746766	NA	0.139142
K01848	E5.4.99.2A, mcmA1; methylmalonyl-CoA mutase, N-terminal domain [EC:5.4.99.2]	1.43343	0.14887	NA	-0.639949
K02922	RP-L37e, RPL37; large subunit ribosomal protein L37e	1.45977	0.171321	NA	-0.604061
K03789	rimI; [ribosomal protein S18]-alanine N-acetyltransferase [EC:2.3.1.266]	1.97792	0.985496	NA	-0.00748523
K03053	rpoH; DNA-directed RNA polymerase subunit H [EC:2.7.7.6]	1.97792	0.985496	NA	-0.00748523
K00226	pyrD; dihydroorotate dehydrogenase (fumarate) [EC:1.3.98.1]	1.72766	0.469604	NA	0.340557
K02039	phoU; phosphate transport system protein	1.95292	0.94019	NA	-0.0309791
K02201	E2.7.7.3B; pantetheine-phosphate adenylyltransferase [EC:2.7.7.3]	1.95285	0.940174	NA	-0.0309874
K03568	tldD; TldD protein	1.92785	0.89457	NA	-0.0548705
K02015	ABC.FEV.P; iron complex transport system permease protein	1.95335	0.940287	NA	-0.03093
K14574	SDO1, SBDS; ribosome maturation protein SDO1	1.97792	0.985496	NA	-0.00748523
K07095	K07095; uncharacterized protein	1.21237	0.0293221	NA	-1.00749
K02881	RP-L18, MRPL18, rplR; large subunit ribosomal protein L18	1.97792	0.985496	NA	-0.00748523
K09726	K09726; uncharacterized protein	1.95292	0.858308	NA	0.0750472
K06911	PIR; quercetin 2,3-dioxygenase [EC:1.13.11.24]	1.26065	0.159212	NA	-0.662361
K06944	DRG, RBG; developmentally-regulated GTP-binding protein [EC:3.6.5.-]	1.97727	0.985367	NA	-0.00755931
K00340	nuoK; NADH-quinone oxidoreductase subunit K [EC:7.1.1.2]	1.70543	0.691884	NA	0.182432
K03330	gatE; glutamyl-tRNA(Gln) amidotransferase subunit E [EC:6.3.5.7]	1.90383	0.849214	NA	-0.0790396
K02912	RP-L32e, RPL32; large subunit ribosomal protein L32e	1.97792	0.985496	NA	-0.00748523
K09723	ginS; DNA replication factor GINS	1.85482	0.284279	NA	-0.429483
K01887	RARS, argS; arginyl-tRNA synthetase [EC:6.1.1.19]	1.97792	0.985496	NA	-0.00748523
K01474	hyuB; N-methylhydantoinase B [EC:3.5.2.14]	1.87688	0.790807	NA	0.115279
K04479	dbh; DNA polymerase IV (archaeal DinB-like DNA polymerase) [EC:2.7.7.7]	1.85285	0.757452	NA	-0.128988
K07107	ybgC; acyl-CoA thioester hydrolase [EC:3.1.2.-]	1.38637	0.0152999	NA	-1.05429
K02954	RP-S14, MRPS14, rpsN; small subunit ribosomal protein S14	1.58431	0.312156	NA	-0.437898
K04488	iscU, nifU; nitrogen fixation protein NifU and related proteins	1.90378	0.849031	NA	-0.0790453
K00161	PDHA, pdhA; pyruvate dehydrogenase E1 component alpha subunit [EC:1.2.4.1]	1.43578	0.000121174	NA	-1.59246
K02864	RP-L10, MRPL10, rplJ; large subunit ribosomal protein L10	1.9531	0.94023	NA	-0.0309588
K02427	rlmE, rrmJ, ftsJ; 23S rRNA (uridine2552-2'-O)-methyltransferase [EC:2.1.1.166]	1.97792	0.815223	NA	0.0980749
K06920	queC; 7-cyano-7-deazaguanine synthase [EC:6.3.4.20]	1.85285	0.757452	NA	-0.128988
K01638	aceB, glcB; malate synthase [EC:2.3.3.9]	1.8028	0.667338	NA	-0.180609
K19302	bcrC; undecaprenyl-diphosphatase [EC:3.6.1.27]	1.36201	0.094044	NA	-0.751986
K03167	top6B; DNA topoisomerase VI subunit B [EC:5.6.2.2]	1.97792	0.985496	NA	-0.00748523
K17104	E2.5.1.41; phosphoglycerol geranylgeranyltransferase [EC:2.5.1.41]	1.92792	0.705206	NA	0.162583
K00294	E1.2.1.88; 1-pyrroline-5-carboxylate dehydrogenase [EC:1.2.1.88]	1.97749	0.985416	NA	-0.0075341
K00995	pgsA, PGS1; CDP-diacylglycerol---glycerol-3-phosphate 3-phosphatidyltransferase [EC:2.7.8.5]	1.68201	0.456954	NA	-0.317767
K03030	PSMD14, RPN11, POH1; 26S proteasome regulatory subunit N11	1.31067	0.122651	NA	-0.709228
K01755	argH, ASL; argininosuccinate lyase [EC:4.3.2.1]	1.92878	0.894784	NA	-0.054762
K05831	lysK, argE; [amino group carrier protein]-lysine/ornithine hydrolase [EC:3.5.1.130 3.5.1.132]	1.90421	0.849132	NA	-0.0789943
K01858	INO1, ISYNA1; myo-inositol-1-phosphate synthase [EC:5.5.1.4]	1.92835	0.902561	NA	0.0516039
K02950	RP-S12, MRPS12, rpsL; small subunit ribosomal protein S12	1.92792	0.705206	NA	0.162583
K06215	pdxS, pdx1; pyridoxal 5'-phosphate synthase pdxS subunit [EC:4.3.3.6]	1.92792	0.902652	NA	0.0515539
K01265	map; methionyl aminopeptidase [EC:3.4.11.18]	1.97792	0.985496	NA	-0.00748523
K04751	glnB; nitrogen regulatory protein P-II 1	1.75362	0.808092	NA	0.108602
K02013	ABC.FEV.A; iron complex transport system ATP-binding protein [EC:7.2.2.-]	1.95335	0.940287	NA	-0.03093
K05982	E3.1.21.7, nfi; deoxyribonuclease V [EC:3.1.21.7]	1.97835	0.985607	NA	-0.00743616
K05830	lysJ, argD; [amino-group carrier protein]-gamma-(L-lysyl/L-ornithyl)-L-glutamate aminotransferase [EC:2.6.1.118 2.6.1.124]	1.90374	0.849194	NA	-0.0790497
K00609	pyrB, PYR2; aspartate carbamoyltransferase catalytic subunit [EC:2.1.3.2]	2.00231	0.832591	NA	-0.0855362
K02122	ATPVF, ntpF, atpF; V/A-type H+/Na+-transporting ATPase subunit F	1.92835	0.902561	NA	0.0516039
K01591	pyrF; orotidine-5'-phosphate decarboxylase [EC:4.1.1.23]	1.97792	0.985511	NA	-0.00748515
K11924	mntR; DtxR family transcriptional regulator, manganese transport regulator	1.90292	0.746848	NA	0.139091
K00945	cmk; CMP/dCMP kinase [EC:2.7.4.25]	1.97792	0.985496	NA	-0.00748523
K09807	K09807; uncharacterized protein	1.97792	0.985496	NA	-0.00748523
K02501	hisH; imidazole glycerol-phosphate synthase subunit HisH [EC:4.3.2.10]	1.95335	0.940287	NA	-0.03093
K00798	MMAB, pduO; cob(I)alamin adenosyltransferase [EC:2.5.1.17]	1.97749	0.985416	NA	-0.0075341
K09143	K09143; uncharacterized protein	1.65695	0.780321	NA	0.129129
K01704	leuD, IPMI-S; 3-isopropylmalate/(R)-2-methylmalate dehydratase small subunit [EC:4.2.1.33 4.2.1.35]	1.58426	0.312147	NA	-0.437905
K01738	cysK; cysteine synthase [EC:2.5.1.47]	1.33744	0.0793423	NA	-0.79149
K00606	panB; 3-methyl-2-oxobutanoate hydroxymethyltransferase [EC:2.1.2.11]	1.9531	0.858584	NA	0.0749768
K01974	RTCA, rtcA; RNA 3'-terminal phosphate cyclase (ATP) [EC:6.5.1.4]	1.9281	0.894743	NA	-0.054842
K00946	thiL; thiamine-monophosphate kinase [EC:2.7.4.16]	1.97773	0.985485	NA	-0.00750696
K00031	IDH1, IDH2, icd; isocitrate dehydrogenase [EC:1.1.1.42]	1.92828	0.894668	NA	-0.0548206
K01756	purB, ADSL; adenylosuccinate lyase [EC:4.3.2.2]	1.95376	0.74495	NA	-0.132743
K03657	uvrD, pcrA; ATP-dependent DNA helicase UvrD/PcrA [EC:5.6.2.4]	1.97742	0.9854	NA	-0.00754248
K02874	RP-L14, MRPL14, rplN; large subunit ribosomal protein L14	1.97792	0.985496	NA	-0.00748523
K03687	GRPE; molecular chaperone GrpE	1.95292	0.858308	NA	0.0750472
K00024	mdh; malate dehydrogenase [EC:1.1.1.37]	1.85267	0.571984	NA	-0.232567
K03592	pmbA; PmbA protein	1.97767	0.788271	NA	-0.10899
K03232	EEF1B; elongation factor 1-beta	1.87971	0.803499	NA	-0.103632
K00611	OTC, argF, argI; ornithine carbamoyltransferase [EC:2.1.3.3]	1.97792	0.985496	NA	-0.00748523
K07403	nfeD; membrane-bound serine protease (ClpP class)	1.95292	0.858308	NA	0.0750472
K01438	argE; acetylornithine deacetylase [EC:3.5.1.16]	1.26164	0.0449856	NA	-0.917312
K02428	#N/A	1.97792	0.985496	NA	-0.00748523
K04042	glmU; bifunctional UDP-N-acetylglucosamine pyrophosphorylase / glucosamine-1-phosphate N-acetyltransferase [EC:2.7.7.23 2.3.1.157]	1.83005	0.712694	NA	-0.15429
K01866	YARS, tyrS; tyrosyl-tRNA synthetase [EC:6.1.1.1]	1.97792	0.985496	NA	-0.00748523
K07027	K07027; glycosyltransferase 2 family protein	1.90287	0.947808	NA	0.0276664
K01186	NEU1; sialidase-1 [EC:3.2.1.18]	1.87732	0.803154	NA	-0.103923
K09816	znuB; zinc transport system permease protein	1.80518	0.866767	NA	-0.0717332
K01921	ddl; D-alanine-D-alanine ligase [EC:6.3.2.4]	1.60713	0.502114	NA	-0.294398
K00948	PRPS, prsA; ribose-phosphate pyrophosphokinase [EC:2.7.6.1]	1.97792	0.985511	NA	-0.00748515
K07446	trm-G10; tRNA (guanine10-N2)-dimethyltransferase [EC:2.1.1.213]	1.97835	0.985607	NA	-0.00743616
K00411	UQCRFS1, RIP1, petA; ubiquinol-cytochrome c reductase iron-sulfur subunit [EC:7.1.1.8]	1.85285	0.757452	NA	-0.128988
K12960	mtaD; 5-methylthioadenosine/S-adenosylhomocysteine deaminase [EC:3.5.4.31 3.5.4.28]	1.92735	0.700017	NA	-0.15711
K06974	amzA, AMZ2, AMZ1; archaemetzincin [EC:3.4.-.-]	1.92828	0.894668	NA	-0.0548206
K03424	tatD; TatD DNase family protein [EC:3.1.21.-]	1.97792	0.985496	NA	-0.00748523
K00939	adk, AK; adenylate kinase [EC:2.7.4.3]	2.00242	0.969803	NA	0.0155761
K04085	tusA, sirA; tRNA 2-thiouridine synthesizing protein A [EC:2.8.1.-]	1.36128	0.273918	NA	-0.506319
K08963	mtnA; methylthioribose-1-phosphate isomerase [EC:5.3.1.23]	1.97792	0.985496	NA	-0.00748523
K07098	K07098; uncharacterized protein	1.85403	0.758021	NA	-0.128844
K04096	smf; DNA processing protein	1.33574	0.0798514	NA	-0.791531
K03653	K03653; N-glycosylase/DNA lyase [EC:3.2.2.- 4.2.99.18]	1.97792	0.985496	NA	-0.00748523
K00342	nuoM; NADH-quinone oxidoreductase subunit M [EC:7.1.1.2]	1.85371	0.63757	NA	0.208395
K11212	cofD; LPPG:FO 2-phospho-L-lactate transferase [EC:2.7.8.28]	1.97792	0.985496	NA	-0.00748523
K22205	E3.13.2.3; S-adenosyl-L-methionine hydrolase (adenosine-forming) [EC:3.13.2.3]	1.9781	0.815188	NA	0.0980951
K02601	nusG; transcription termination/antitermination protein NusG	1.97792	0.985496	NA	-0.00748523
K07213	ATOX1, ATX1, copZ, golB; copper chaperone	1.65436	0.996782	NA	0.0018243
K07749	frc; formyl-CoA transferase [EC:2.8.3.16]	1.23759	0.0365435	NA	-0.961594
K09129	K09129; uncharacterized protein	1.92828	0.894668	NA	-0.0548206
K00096	araM, egsA; glycerol-1-phosphate dehydrogenase [NAD(P)+] [EC:1.1.1.261]	1.95292	0.94019	NA	-0.0309791
K03552	hjr; holliday junction resolvase Hjr [EC:3.1.21.10]	1.36231	0.166121	NA	-0.630847
K12589	RRP42, EXOSC7; exosome complex component RRP42	1.97792	0.985496	NA	-0.00748523
K01754	E4.3.1.19, ilvA, tdcB; threonine dehydratase [EC:4.3.1.19]	1.95244	0.940146	NA	-0.0310343
K01256	pepN; aminopeptidase N [EC:3.4.11.2]	1.95249	0.85854	NA	0.0749986
K22446	K22446; tRNA (cytosine49-C5)-methyltransferase [EC:2.1.1.-]	1.97792	0.985496	NA	-0.00748523
K01039	gctA; glutaconate CoA-transferase, subunit A [EC:2.8.3.12]	1.21237	0.0293221	NA	-1.00749
K07561	DPH1, dph2; 2-(3-amino-3-carboxypropyl)histidine synthase [EC:2.5.1.108]	1.97792	0.985496	NA	-0.00748523
K00338	nuoI; NADH-quinone oxidoreductase subunit I [EC:7.1.1.2]	1.78021	0.570543	NA	0.258706
K02965	RP-S19, rpsS; small subunit ribosomal protein S19	1.95335	0.940287	NA	-0.03093
K07444	ypsC; putative N6-adenine-specific DNA methylase [EC:2.1.1.-]	1.9527	0.940141	NA	-0.0310044
K01426	E3.5.1.4, amiE; amidase [EC:3.5.1.4]	1.31128	0.969839	NA	-0.019145
K01737	queD, ptpS, PTS; 6-pyruvoyltetrahydropterin/6-carboxytetrahydropterin synthase [EC:4.2.3.12 4.1.2.50]	1.85285	0.757452	NA	-0.128988
K01702	LEU1; 3-isopropylmalate dehydratase [EC:4.2.1.33]	1.28373	0.405549	NA	0.464311
K09736	K09736; uncharacterized protein	1.85391	0.757708	NA	-0.128857
K03057	tfs; transcription factor S	1.95292	0.94019	NA	-0.0309791
K09791	K09791; uncharacterized protein	1.95324	0.940262	NA	-0.0309426
K00610	pyrI; aspartate carbamoyltransferase regulatory subunit	1.95227	0.940106	NA	-0.0310551
K07745	K07745; transcriptional regulator	1.33744	0.0793423	NA	-0.79149
K01835	pgm; phosphoglucomutase [EC:5.4.2.2]	1.95292	0.858308	NA	0.0750472
K01151	nfo; deoxyribonuclease IV [EC:3.1.21.2]	2.00224	0.646642	NA	-0.182854
K06001	trpB; tryptophan synthase beta chain [EC:4.2.1.20]	1.90375	0.947672	NA	0.027771
K06961	KRR1; ribosomal RNA assembly protein	1.95328	0.858571	NA	0.0749058
K12995	wbdC, mtfC; O-antigen biosynthesis alpha-1,3-mannosyltransferase [EC:2.4.1.348 2.4.1.-]	1.26026	0.652012	NA	0.243917
K01845	hemL; glutamate-1-semialdehyde 2,1-aminomutase [EC:5.4.3.8]	1.88121	0.439504	NA	0.355746
K03049	rpoE1; DNA-directed RNA polymerase subunit E' [EC:2.7.7.6]	1.9527	0.940141	NA	-0.0310044
K02982	RP-S3, rpsC; small subunit ribosomal protein S3	1.95292	0.858308	NA	0.0750472
K00382	DLD, lpd, pdhD; dihydrolipoamide dehydrogenase [EC:1.8.1.4]	1.33759	0.0793545	NA	-0.791465
K05520	pfpI; protease I [EC:3.5.1.124]	1.4102	0.128782	NA	-0.676239
K00555	TRMT1, trm1; tRNA (guanine26-N2/guanine27-N2)-dimethyltransferase [EC:2.1.1.215 2.1.1.216]	1.97792	0.985496	NA	-0.00748523
K04564	SOD2; superoxide dismutase, Fe-Mn family [EC:1.15.1.1]	1.95267	0.858673	NA	0.074927
K03635	MOCS2B, moaE; molybdopterin synthase catalytic subunit [EC:2.8.1.12]	1.92787	0.894577	NA	-0.0548672
K07023	YGK1, HDDC2; 5'-deoxynucleotidase [EC:3.1.3.89]	1.90292	0.84883	NA	-0.0791472
K09951	cas2; CRISPR-associated protein Cas2	1.53164	0.59354	NA	0.267098
K02441	glpG; rhomboid protease GlpG [EC:3.4.21.105]	1.92878	0.894784	NA	-0.054762
K20447	ndhL; nicotinate dehydrogenase large molybdopterin subunit [EC:1.17.1.5]	1.65389	0.579236	NA	0.262595
K04799	FEN1, RAD2; flap endonuclease-1 [EC:3.1.-.-]	1.97792	0.985496	NA	-0.00748523
K04794	PTH2, PTRH2; peptidyl-tRNA hydrolase, PTH2 family [EC:3.1.1.29]	1.95328	0.94027	NA	-0.0309384
K00928	lysC; aspartate kinase [EC:2.7.2.4]	1.95335	0.940287	NA	-0.03093
K01496	hisI; phosphoribosyl-AMP cyclohydrolase [EC:3.5.4.19]	1.95292	0.940254	NA	-0.0309796
K12339	cysM; S-sulfo-L-cysteine synthase (O-acetyl-L-serine-dependent) [EC:2.5.1.144]	1.97749	0.985416	NA	-0.0075341
K05275	E1.1.1.65; pyridoxine 4-dehydrogenase [EC:1.1.1.65]	1.4567	0.343395	NA	0.500895
K03106	SRP54, ffh; signal recognition particle subunit SRP54 [EC:3.6.5.4]	1.95378	0.940449	NA	-0.0308797
K18855	E1.1.1.374; UDP-N-acetylglucosamine 3-dehydrogenase [EC:1.1.1.374]	1.97792	0.985496	NA	-0.00748523
K11710	troB, mntB, znuC; manganese/zinc/iron transport system ATP- binding protein [EC:7.2.2.5]	1.90199	0.748463	NA	0.13878
K08681	pdxT, pdx2; pyridoxal 5'-phosphate synthase pdxT subunit [EC:4.3.3.6]	1.95292	0.94019	NA	-0.0309791
K02600	nusA; transcription termination/antitermination protein NusA	1.97792	0.985496	NA	-0.00748523
K09002	csm3; CRISPR-associated protein Csm3	1.92638	0.114125	NA	-0.62217
K02042	phnE; phosphonate transport system permease protein	1.85285	0.757452	NA	-0.128988
K03430	phnW; 2-aminoethylphosphonate-pyruvate transaminase [EC:2.6.1.37]	1.28373	0.405549	NA	0.464311
K06981	ipk; isopentenyl phosphate kinase [EC:2.7.4.26]	1.8053	0.491784	NA	-0.284782
K02278	cpaA, tadV; prepilin peptidase CpaA [EC:3.4.23.43]	1.9527	0.940141	NA	-0.0310044
K07142	mptE; 2-amino-4-hydroxy-6-hydroxymethyldihydropteridine diphosphokinase [EC:2.7.6.3]	1.90378	0.849031	NA	-0.0790453
K07179	RIOK2; RIO kinase 2 [EC:2.7.11.1]	1.95292	0.94019	NA	-0.0309791
K09122	K09122; uncharacterized protein	1.95292	0.858308	NA	0.0750472
K01951	guaA, GMPS; GMP synthase (glutamine-hydrolysing) [EC:6.3.5.2]	1.92805	0.894733	NA	-0.0548472
K03638	moaB; molybdopterin adenylyltransferase [EC:2.7.7.75]	1.97792	0.985496	NA	-0.00748523
K07250	gabT; 4-aminobutyrate aminotransferase / (S)-3-amino-2-methylpropionate transaminase / 5-aminovalerate transaminase [EC:2.6.1.19 2.6.1.22 2.6.1.48]	1.21237	0.0293221	NA	-1.00749
K01551	arsA, ASNA1, GET3; arsenite/tail-anchored protein-transporting ATPase [EC:7.3.2.7 7.3.-.-]	1.43578	0.000121174	NA	-1.59246
K05716	CPGS; cyclic 2,3-diphosphoglycerate synthase [EC:6.5.1.9]	1.21237	0.0293221	NA	-1.00749
K19664	carS; CDP-2,3-bis-(O-geranylgeranyl)-sn-glycerol synthase [EC:2.7.7.67]	1.97792	0.985496	NA	-0.00748523
K00860	cysC; adenylylsulfate kinase [EC:2.7.1.25]	1.70489	0.34566	NA	-0.395931
K03679	RRP4, EXOSC2; exosome complex component RRP4	1.97792	0.985496	NA	-0.00748523
K07572	K07572; putative nucleotide binding protein	1.97792	0.985496	NA	-0.00748523
K01715	crt; enoyl-CoA hydratase [EC:4.2.1.17]	1.23742	0.0369083	NA	-0.961491
K07064	K07064; uncharacterized protein	1.92769	0.895145	NA	-0.054897
K07407	E3.2.1.22B, galA, rafA; alpha-galactosidase [EC:3.2.1.22]	1.60421	0.11881	NA	0.845384
K18915	feR; ferric-chelate reductase [NAD(P)H] [EC:1.16.1.10]	1.62895	0.621211	NA	0.235583
K20885	K20885; beta-1,2-mannobiose phosphorylase / 1,2-beta-oligomannan phosphorylase [EC:2.4.1.339 2.4.1.340]	1.26027	0.441729	NA	0.430577
K01194	TREH, treA, treF; alpha,alpha-trehalase [EC:3.2.1.28]	1.23484	0.480752	NA	0.395679
K07324	flaA; archaeal flagellin FlaA	1.77981	0.623648	NA	-0.206866
K03263	EIF5A; translation initiation factor 5A	1.97792	0.985511	NA	-0.00748515
K02966	RP-S19e, RPS19; small subunit ribosomal protein S19e	1.97792	0.985496	NA	-0.00748523
K03118	tatC; sec-independent protein translocase protein TatC	1.97749	0.815144	NA	0.0981166
K00864	glpK, GK; glycerol kinase [EC:2.7.1.30]	1.60421	0.11881	NA	0.845384
K01176	AMY, amyA, malS; alpha-amylase [EC:3.2.1.1]	1.43161	0.235462	NA	0.652737
K00111	glpA, glpD; glycerol-3-phosphate dehydrogenase [EC:1.1.5.3]	1.62878	0.107696	NA	0.870903
K09763	K09763; uncharacterized protein	1.85285	0.757452	NA	-0.128988
K17884	E2.7.8.39; archaetidylinositol phosphate synthase [EC:2.7.8.39]	1.85417	0.319834	NA	0.461845
K00260	gudB, rocG; glutamate dehydrogenase [EC:1.4.1.2]	1.97792	0.985496	NA	-0.00748523
K00171	porD; pyruvate ferredoxin oxidoreductase delta subunit [EC:1.2.7.1]	1.99949	0.0228682	NA	1.20802
K03050	rpoE2; DNA-directed RNA polymerase subunit E" [EC:2.7.7.6]	1.55676	0.145017	NA	0.793181
K02977	RP-S27Ae, RPS27A, UBA80; ubiquitin-small subunit ribosomal protein S27Ae	1.87898	0.803326	NA	-0.103719
K08976	K08976; putative membrane protein	1.82785	0.913218	NA	-0.0464532
K14165	K14165; atypical dual specificity phosphatase [EC:3.1.3.16 3.1.3.48]	1.92792	0.705206	NA	0.162583
K03799	htpX; heat shock protein HtpX [EC:3.4.24.-]	1.97792	0.985496	NA	-0.00748523
K09780	K09780; uncharacterized protein	1.23615	0.481138	NA	0.395915
K22477	argO; N-acetylglutamate synthase [EC:2.3.1.1]	1.85285	0.757452	NA	-0.128988
K00073	allD; ureidoglycolate dehydrogenase (NAD+) [EC:1.1.1.350]	1.50532	0.176643	NA	0.738428
K00134	GAPDH, gapA; glyceraldehyde 3-phosphate dehydrogenase (phosphorylating) [EC:1.2.1.12]	1.77908	0.0578372	NA	1.01559
K07573	CSL4, EXOSC1; exosome complex component CSL4	1.95292	0.94019	NA	-0.0309791
K03605	hyaD, hybD; hydrogenase maturation protease [EC:3.4.23.-]	1.72929	0.0711025	NA	0.968993
K10914	crp; CRP/FNR family transcriptional regulator, cyclic AMP receptor protein	1.62878	0.107696	NA	0.870903
K16950	asrA; anaerobic sulfite reductase subunit A	1.70343	0.0794079	NA	0.94499
K04651	hypA, hybF; hydrogenase nickel incorporation protein HypA/HybF	1.67977	0.0877355	NA	0.920877
K09955	K09955; uncharacterized protein	1.62921	0.10801	NA	0.870957
K02041	phnC; phosphonate transport system ATP-binding protein [EC:7.3.2.2]	1.85285	0.757452	NA	-0.128988
K09796	pccA; periplasmic copper chaperone A	1.65368	0.267578	NA	0.555968
K06988	fno; 8-hydroxy-5-deazaflavin:NADPH oxidoreductase [EC:1.5.1.40]	1.95267	0.665375	NA	0.185581
K01126	E3.1.4.46, glpQ, ugpQ; glycerophosphoryl diester phosphodiesterase [EC:3.1.4.46]	1.57953	0.131359	NA	0.819385
K19712	cobY; adenosylcobinamide-phosphate guanylyltransferase [EC:2.7.7.62]	1.9281	0.894627	NA	-0.0548414
K00077	panE, apbA; 2-dehydropantoate 2-reductase [EC:1.1.1.169]	1.70472	0.0788826	NA	0.945161
K09722	K09722, pps; 4-phosphopantoate---beta-alanine ligase [EC:6.3.2.36]	1.97778	0.81544	NA	0.0980588
K06982	pok; pantoate kinase [EC:2.7.1.169]	1.92853	0.902695	NA	0.0515322
K11177	yagR; xanthine dehydrogenase YagR molybdenum-binding subunit [EC:1.17.1.4]	1.60421	0.11881	NA	0.845384
K01956	carA, CPA1; carbamoyl-phosphate synthase small subunit [EC:6.3.5.5]	1.92835	0.705411	NA	0.162636
K00602	purH; phosphoribosylaminoimidazolecarboxamide formyltransferase / IMP cyclohydrolase [EC:2.1.2.3 3.5.4.10]	1.87782	0.0386046	NA	1.10439
K17830	GGR; digeranylgeranylglycerophospholipid reductase [EC:1.3.1.101 1.3.7.11]	1.97792	0.985496	NA	-0.00748523
K02961	RP-S17, MRPS17, rpsQ; small subunit ribosomal protein S17	1.97792	0.985496	NA	-0.00748523
K20257	pqsE; 2-aminobenzoylacetyl-CoA thioesterase [EC:3.1.2.32]	1.43401	0.235799	NA	0.653117
K15977	K15977; putative oxidoreductase	1.77924	0.971913	NA	0.015382
K21515	aviRa; 23S rRNA (guanine2535-N1)-methyltransferase [EC:2.1.1.209]	1.5067	0.848037	NA	0.0922975
K02030	ABC.PA.S; polar amino acid transport system substrate-binding protein	1.72929	0.0711025	NA	0.968993
K02029	ABC.PA.P; polar amino acid transport system permease protein	1.75386	0.0642506	NA	0.992437
K02028	ABC.PA.A; polar amino acid transport system ATP-binding protein [EC:7.4.2.1]	1.72929	0.0711025	NA	0.968993
K00930	argB; acetylglutamate kinase [EC:2.7.2.8]	1.90367	0.849006	NA	-0.0790584
K05826	lysW; alpha-aminoadipate/glutamate carrier protein LysW	1.87867	0.993454	NA	0.00347743
K01187	malZ; alpha-glucosidase [EC:3.2.1.20]	1.40679	0.259179	NA	0.622958
K05989	ramA; alpha-L-rhamnosidase [EC:3.2.1.40]	1.70253	0.0799664	NA	0.944861
K01042	selA; L-seryl-tRNA(Ser) seleniumtransferase [EC:2.9.1.1]	1.63007	0.107333	NA	0.871082
K06921	K06921; uncharacterized protein	1.77718	0.0715604	NA	1.01512
K06148	ABCC-BAC; ATP-binding cassette, subfamily C, bacterial	1.2598	0.441804	NA	0.430494
K17488	mptA; GTP cyclohydrolase IV [EC:3.5.4.39]	1.90378	0.849031	NA	-0.0790453
K07100	K07100; putative phosphoribosyl transferase	1.95292	0.858308	NA	0.0750472
K03445	nepI; MFS transporter, DHA1 family, purine ribonucleoside efflux pump	1.40691	0.258595	NA	0.622984
K07451	mcrA; 5-methylcytosine-specific restriction enzyme A [EC:3.1.21.-]	1.40722	0.259138	NA	0.623028
K06990	MEMO1; MEMO1 family protein	1.97792	0.985496	NA	-0.00748523
K03970	pspB; phage shock protein B	1.43161	0.235462	NA	0.652737
K03707	tenA; thiaminase (transcriptional activator TenA) [EC:3.5.99.2]	1.95353	0.744005	NA	-0.132773
K03658	helD; DNA helicase IV [EC:5.6.2.4]	1.95292	0.858308	NA	0.0750472
K10678	nfsA; nitroreductase [EC:1.-.-.-]	1.8791	0.803353	NA	-0.103706
K07401	K07401; selenoprotein W-related protein	1.80328	0.667453	NA	-0.180549
K02908	RP-L30e, RPL30; large subunit ribosomal protein L30e	1.97792	0.985496	NA	-0.00748523
K07112	K07112; uncharacterized protein	1.77929	0.0581883	NA	1.01561
K01239	E3.2.2.1; purine nucleosidase [EC:3.2.2.1]	1.65423	0.405985	NA	0.404263
K08177	oxlT; MFS transporter, OFA family, oxalate/formate antiporter	1.78052	0.0586028	NA	1.01577
K02889	RP-L21e, RPL21; large subunit ribosomal protein L21e	1.97792	0.985496	NA	-0.00748523
K03051	rpoF; DNA-directed RNA polymerase subunit F [EC:2.7.7.6]	1.97792	0.985496	NA	-0.00748523
K00133	asd; aspartate-semialdehyde dehydrogenase [EC:1.2.1.11]	1.97792	0.985496	NA	-0.00748523
K03264	EIF6; translation initiation factor 6	1.67921	0.0874872	NA	0.920808
K04654	hypD; hydrogenase expression/formation protein HypD	1.75373	0.0644594	NA	0.992419
K04653	hypC; hydrogenase expression/formation protein HypC	1.60451	0.118797	NA	0.845425
K04655	hypE; hydrogenase expression/formation protein HypE	1.85436	0.0426443	NA	1.08285
K02120	ATPVD, ntpD, atpD; V/A-type H+/Na+-transporting ATPase subunit D	1.97792	0.985496	NA	-0.00748523
K04517	tyrA2; prephenate dehydrogenase [EC:1.3.1.12]	1.95292	0.94019	NA	-0.0309791
K02510	hpaI, hpcH; 4-hydroxy-2-oxoheptanedioate aldolase [EC:4.1.2.52]	1.58136	0.131275	NA	0.819641
K07281	ipct; 1L-myo-inositol 1-phosphate cytidylyltransferase [EC:2.7.7.74]	1.77911	0.0580227	NA	1.01559
K10119	msmG; raffinose/stachyose/melibiose transport system permease protein	1.70313	0.0796775	NA	0.944946
K13010	per, rfbE; perosamine synthetase [EC:2.6.1.102]	1.65391	0.0972504	NA	0.896058
K09121	larC; pyridinium-3,5-bisthiocarboxylic acid mononucleotide nickel chelatase [EC:4.99.1.12]	1.35855	0.310686	NA	0.561743
K02121	ATPVE, ntpE, atpE; V/A-type H+/Na+-transporting ATPase subunit E	1.97792	0.985496	NA	-0.00748523
K02019	modE; molybdate transport system regulatory protein	1.80346	0.667496	NA	-0.180526
K07013	K07013; uncharacterized protein	1.72922	0.652934	NA	0.208309
K03626	EGD2, NACA; nascent polypeptide-associated complex subunit alpha	1.95292	0.94019	NA	-0.0309791
K01823	idi, IDI; isopentenyl-diphosphate Delta-isomerase [EC:5.3.3.2]	1.97792	0.985496	NA	-0.00748523
K02962	RP-S17e, RPS17; small subunit ribosomal protein S17e	1.48417	0.897472	NA	0.0622605
K09732	K09732; uncharacterized protein	1.9527	0.940141	NA	-0.0310044
K10686	UBA3, UBE1C; NEDD8-activating enzyme E1 [EC:6.2.1.64]	1.65858	0.418613	NA	-0.346733
K05966	citG; triphosphoribosyl-dephospho-CoA synthase [EC:2.4.2.52]	1.90421	0.849132	NA	-0.0789943
K19710	E2.7.7.53; ATP adenylyltransferase [EC:2.7.7.53]	1.95401	0.9405	NA	-0.030854
K03014	RPABC2, RPB6, POLR2F; DNA-directed RNA polymerases I, II, and III subunit RPABC2	1.97792	0.985496	NA	-0.00748523
K11529	gck, gckA, GLYCTK; glycerate 2-kinase [EC:2.7.1.165]	1.80343	0.156784	NA	0.702709
K12614	DDX6, RCK, DHH1; ATP-dependent RNA helicase DDX6/DHH1 [EC:3.6.4.13]	1.67944	0.375433	NA	0.430123
K18532	AK6, FAP7; adenylate kinase [EC:2.7.4.3]	1.92828	0.894668	NA	-0.0548206
K11130	NOP10, NOLA3; H/ACA ribonucleoprotein complex subunit 3	1.21192	0.520075	NA	-0.322532
K03237	EIF2S1; translation initiation factor 2 subunit 1	1.90292	0.84883	NA	-0.0791472
K00021	HMGCR; hydroxymethylglutaryl-CoA reductase (NADPH) [EC:1.1.1.34]	1.82785	0.712162	NA	-0.154565
K09728	K09728; uncharacterized protein	1.33567	0.0791971	NA	-0.791788
K12574	rnj; ribonuclease J [EC:3.1.-.-]	1.70464	0.0788845	NA	0.945152
K02994	RP-S8, rpsH; small subunit ribosomal protein S8	1.97792	0.985496	NA	-0.00748523
K22408	dac; N,N'-diacetylchitobiose non-reducing end deacetylase [EC:3.5.1.136]	1.52989	0.160188	NA	0.765897
K11312	K11312; cupin 2 domain-containing protein	1.57921	0.131746	NA	0.819334
K06878	K06878; tRNA-binding protein	1.85417	0.319834	NA	0.461845
K00537	arsC; arsenate reductase (glutaredoxin) [EC:1.20.4.1]	1.40704	0.258583	NA	0.623005
K00568	ubiG; 2-polyprenyl-6-hydroxyphenyl methylase / 3-demethylubiquinone-9 3-methyltransferase [EC:2.1.1.222 2.1.1.64]	1.62835	0.186684	NA	0.693224
K01639	E4.1.3.3, nanA, NPL; N-acetylneuraminate lyase [EC:4.1.3.3]	1.65387	0.406031	NA	0.404213
K00874	kdgK; 2-dehydro-3-deoxygluconokinase [EC:2.7.1.45]	1.85436	0.0429463	NA	1.08285
K03151	thiI; tRNA uracil 4-sulfurtransferase [EC:2.8.1.4]	1.95292	0.940254	NA	-0.0309796
K19588	dopDH; 2,5-dioxopentanoate dehydrogenase [EC:1.2.1.26]	1.72886	0.0713311	NA	0.968938
K14259	kdaD, xacE, kdxD; 2-dehydro-3-deoxy-D-arabinonate dehydratase [EC:4.2.1.141]	1.75386	0.0642506	NA	0.992437
K01867	WARS, trpS; tryptophanyl-tRNA synthetase [EC:6.1.1.2]	1.9531	0.858439	NA	0.0749767
K01209	abfA; alpha-L-arabinofuranosidase [EC:3.2.1.55]	1.60421	0.11881	NA	0.845384
K16692	etk-wzc; tyrosine-protein kinase Etk/Wzc [EC:2.7.10.3]	1.40704	0.258583	NA	0.623005
K03335	iolE; inosose dehydratase [EC:4.2.1.44]	1.60421	0.11881	NA	0.845384
K02927	RP-L40e, RPL40, UBA52; ubiquitin-large subunit ribosomal protein L40e	1.85285	0.757452	NA	-0.128988
K03337	iolB; 5-deoxy-glucuronate isomerase [EC:5.3.1.30]	1.60421	0.11881	NA	0.845384
K11473	glcF; glycolate dehydrogenase iron-sulfur subunit [EC:1.1.99.14]	1.21227	0.521851	NA	0.36044
K08223	fsr; MFS transporter, FSR family, fosmidomycin resistance protein	1.65412	0.0978611	NA	0.896078
K07580	K07580; Zn-ribbon RNA-binding protein	1.65711	0.418281	NA	-0.346941
K08679	GAE, cap1J; UDP-glucuronate 4-epimerase [EC:5.1.3.6]	1.40974	0.258894	NA	0.62344
K09163	K09163; uncharacterized protein	1.87785	0.613748	NA	-0.207064
K09819	ABC.MN.P; manganese/iron transport system permease protein	1.90346	0.747069	NA	0.138965
K09818	ABC.MN.S; manganese/iron transport system substrate-binding protein	1.67858	0.088046	NA	0.920717
K15975	K15975; glyoxalase family protein	1.65401	0.0975495	NA	0.896067
K00016	LDH, ldh; L-lactate dehydrogenase [EC:1.1.1.27]	1.57987	0.131343	NA	0.819431
K07464	cas4; CRISPR-associated exonuclease Cas4 [EC:3.1.12.1]	1.60611	0.878135	NA	0.0729872
K15342	cas1; CRISP-associated protein Cas1	1.63079	0.830968	NA	0.101013
K19085	csa1; CRISPR-associated protein Csa1	1.4824	0.676759	NA	0.208229
K19087	csa5; CRISPR-associated protein Csa5	1.23524	0.480682	NA	0.395751
K07475	cas3; CRISPR-associated endonuclease Cas3-HD [EC:3.1.-.-]	1.43236	0.556828	NA	0.303152
K06398	spoIVA; stage IV sporulation protein A	1.28487	0.405378	NA	0.46451
K08851	TP53RK, PRPK, BUD32; TP53 regulating kinase and related kinases [EC:2.7.11.1]	1.97792	0.985496	NA	-0.00748523
K00849	galK; galactokinase [EC:2.7.1.6]	1.60421	0.11881	NA	0.845384
K00965	galT, GALT; UDPglucose--hexose-1-phosphate uridylyltransferase [EC:2.7.7.12]	1.60421	0.11881	NA	0.845384
K06929	K06929; uncharacterized protein	1.92792	0.894587	NA	-0.0548621
K07406	melA; alpha-galactosidase [EC:3.2.1.22]	1.67836	0.0883007	NA	0.920683
K00588	E2.1.1.104; caffeoyl-CoA O-methyltransferase [EC:2.1.1.104]	1.60421	0.11881	NA	0.845384
K03752	mobA; molybdenum cofactor guanylyltransferase [EC:2.7.7.77]	1.75545	0.772638	NA	-0.124451
K09147	K09147; uncharacterized protein	1.82923	0.712498	NA	-0.154392
K06889	K06889; uncharacterized protein	1.60464	0.118792	NA	0.845443
K00027	ME2, sfcA, maeA; malate dehydrogenase (oxaloacetate-decarboxylating) [EC:1.1.1.38]	1.90212	0.84898	NA	-0.0792486
K01683	araD; D-arabinonate dehydratase [EC:4.2.1.5]	1.67843	0.0880504	NA	0.920697
K20616	lyeJ; lycopene elongase/hydratase (dihydrobisanhydrobacterioruberin-forming) [EC:2.5.1.150]	1.26063	0.44167	NA	0.430641
K02291	crtB; 15-cis-phytoene synthase [EC:2.5.1.32]	1.26063	0.44167	NA	0.430641
K10027	crtI; phytoene desaturase [EC:1.3.99.26 1.3.99.28 1.3.99.29 1.3.99.31]	1.28545	0.405291	NA	0.464611
K16841	hpxA; allantoin racemase [EC:5.1.99.3]	1.85379	0.0429536	NA	1.08278
K00567	ogt, MGMT; methylated-DNA-[protein]-cysteine S-methyltransferase [EC:2.1.1.63]	1.9277	0.894536	NA	-0.0548879
K00020	HIBADH, mmsB; 3-hydroxyisobutyrate dehydrogenase [EC:1.1.1.31]	1.95239	0.940135	NA	-0.03104
K16783	bioN; biotin transport system permease protein	1.26191	0.441461	NA	0.430869
K02986	RP-S4, rpsD; small subunit ribosomal protein S4	1.97792	0.985496	NA	-0.00748523
K02983	RP-S30e, RPS30; small subunit ribosomal protein S30e	1.58429	0.312154	NA	-0.437899
K15256	cmoA; tRNA (cmo5U34)-methyltransferase [EC:2.1.1.-]	1.43341	0.237646	NA	0.653021
K07503	nucS; endonuclease [EC:3.1.-.-]	1.75343	0.0644656	NA	0.992382
K03639	moaA, CNX2; GTP 3',8-cyclase [EC:4.1.99.22]	1.97817	0.985567	NA	-0.00745642
K03432	psmA, prcA; proteasome alpha subunit [EC:3.4.25.1]	1.97792	0.985496	NA	-0.00748523
K04798	pfdB, PFDN6; prefoldin beta subunit	1.97792	0.985496	NA	-0.00748523
K01480	speB; agmatinase [EC:3.5.3.11]	1.67894	0.0883233	NA	0.92076
K03594	bfr; bacterioferritin [EC:1.16.3.1]	1.9027	0.947847	NA	0.0276454
K07143	K07143; UPF0148 protein	1.75399	0.187119	NA	0.655704
K01975	thpR; RNA 2',3'-cyclic 3'-phosphodiesterase [EC:3.1.4.58]	1.87871	0.803259	NA	-0.103753
K03540	RPR2, RPP21; ribonuclease P protein subunit RPR2 [EC:3.1.26.5]	1.48211	0.194506	NA	0.710632
K19135	csx14; CRISPR-associated protein Csx14	1.28431	0.405463	NA	0.464411
K09739	mptD; dihydroneopterin aldolase [EC:4.1.2.25]	1.90378	0.849031	NA	-0.0790453
K02929	RP-L44e, RPL44; large subunit ribosomal protein L44e	2.00237	0.773163	NA	0.120767
K02978	RP-S27e, RPS27; small subunit ribosomal protein S27e	1.7805	0.819562	NA	-0.0978267
K07588	MMAA, argK; GTPase [EC:3.6.5.-]	1.43343	0.149589	NA	-0.639953
K01486	ade; adenine deaminase [EC:3.5.4.2]	1.26237	0.0450234	NA	-0.917186
K07502	yprB; uncharacterized protein	1.38767	0.111307	NA	-0.713347
K00162	PDHB, pdhB; pyruvate dehydrogenase E1 component beta subunit [EC:1.2.4.1]	1.21237	0.0293221	NA	-1.00749
K03306	TC.PIT; inorganic phosphate transporter, PiT family	1.31074	0.122521	NA	-0.709465
K03976	ybaK, ebsC; Cys-tRNA(Pro)/Cys-tRNA(Cys) deacylase [EC:3.1.1.-]	1.70473	0.679076	NA	-0.179073
K01849	E5.4.99.2B, mcmA2; methylmalonyl-CoA mutase, C-terminal domain [EC:5.4.99.2]	1.43343	0.14887	NA	-0.639949
K06222	dkgB; 2,5-diketo-D-gluconate reductase B [EC:1.1.1.346]	1.50984	0.345831	NA	-0.419474
K01644	citE; citrate lyase subunit beta / citryl-CoA lyase [EC:4.1.3.34]	1.23737	0.0365339	NA	-0.961633
K02051	ABC.SN.S; NitT/TauT family transport system substrate-binding protein	1.63228	0.0159973	NA	-0.98391
K07331	flaH; archaeal flagellar protein FlaH	1.48323	0.195344	NA	-0.569491
K15916	pgi-pmi; glucose/mannose-6-phosphate isomerase [EC:5.3.1.9 5.3.1.8]	1.97792	0.985496	NA	-0.00748523
K06919	K06919; putative DNA primase/helicase	1.23664	0.136326	NA	-0.704058
K02259	COX15, ctaA; heme a synthase [EC:1.17.99.9]	1.38495	0.309076	NA	-0.469706
K01697	CBS; cystathionine beta-synthase [EC:4.2.1.22]	1.33744	0.0793423	NA	-0.79149
K00926	arcC; carbamate kinase [EC:2.7.2.2]	1.33744	0.0793423	NA	-0.79149
K00694	bcsA; cellulose synthase (UDP-forming) [EC:2.4.1.12]	1.89945	0.752104	NA	0.138941
K00720	UGCG; ceramide glucosyltransferase [EC:2.4.1.80]	1.55536	0.973481	NA	0.0156184
K03305	TC.POT; proton-dependent oligopeptide transporter, POT family	1.21237	0.0293221	NA	-1.00749
K06999	K06999; phospholipase/carboxylesterase	1.40954	0.128705	NA	-0.676345
K06200	cstA; carbon starvation protein	1.23737	0.0171693	NA	-1.08559
K01179	E3.2.1.4; endoglucanase [EC:3.2.1.4]	1.7803	0.45313	NA	-0.311789
K01724	PCBD, phhB; 4a-hydroxytetrahydrobiopterin dehydratase [EC:4.2.1.96]	1.68022	0.3129	NA	-0.425184
K07575	MCTS, TMA20; malignant T-cell-amplified sequence	1.7803	0.45313	NA	-0.311789
K01714	dapA; 4-hydroxy-tetrahydrodipicolinate synthase [EC:4.3.3.7]	1.9277	0.894536	NA	-0.0548879
K04484	radB; DNA repair protein RadB	1.35886	0.618228	NA	-0.24164
K15372	toa; taurine---2-oxoglutarate transaminase [EC:2.6.1.55]	1.21237	0.0293221	NA	-1.00749
K22432	carE; caffeyl-CoA reductase-Etf complex subunit CarE [EC:1.3.1.108]	1.85285	0.757452	NA	-0.128988
K03539	RPP1, RPP30; ribonuclease P/MRP protein subunit RPP1 [EC:3.1.26.5]	1.26217	0.0450125	NA	-0.917222
K04763	xerD; integrase/recombinase XerD	1.33567	0.785456	NA	-0.134554
K10947	padR; PadR family transcriptional regulator, regulatory protein PadR	1.40947	0.345462	NA	-0.433982
K07158	K07158; uncharacterized protein	1.38296	0.869628	NA	0.082317
K03079	ulaE, sgaU, sgbU; L-ribulose-5-phosphate 3-epimerase [EC:5.1.3.22]	1.75138	0.0671412	NA	0.992046
K05516	cbpA; curved DNA-binding protein	1.4808	0.200297	NA	0.710363
K18787	ACL5; thermospermine synthase [EC:2.5.1.79]	1.30831	0.371641	NA	0.497461
K12251	aguB; N-carbamoylputrescine amidase [EC:3.5.1.53]	1.45652	0.216277	NA	0.681902
K00210	#N/A	1.43134	0.235486	NA	0.652695
K07184	ygiM; SH3 domain protein	1.40768	0.40673	NA	0.440828
K04797	pfdA, PFDN5; prefoldin alpha subunit	1.43286	0.558183	NA	-0.272743
K00363	nirD; nitrite reductase (NADH) small subunit [EC:1.7.1.15]	1.23459	0.480796	NA	0.395634
K04109	hcrB, hbaD; 4-hydroxybenzoyl-CoA reductase subunit beta [EC:1.1.7.1]	1.21002	0.522275	NA	0.360029
K05816	ugpC; sn-glycerol 3-phosphate transport system ATP-binding protein [EC:7.6.2.10]	1.25916	0.441908	NA	0.430381
K01613	psd, PISD; phosphatidylserine decarboxylase [EC:4.1.1.65]	1.2101	0.522261	NA	0.360043
K00184	dmsB; dimethyl sulfoxide reductase iron-sulfur subunit	1.43202	0.376899	NA	0.470864
K02532	lacY; MFS transporter, OHS family, lactose permease	1.75111	0.0668264	NA	0.992015
K02010	afuC, fbpC; iron(III) transport system ATP-binding protein [EC:7.2.2.7]	1.50775	0.288152	NA	0.558877
K02052	ABC.SP.A; putative spermidine/putrescine transport system ATP-binding protein	1.60512	0.12108	NA	0.845489
K01439	dapE; succinyl-diaminopimelate desuccinylase [EC:3.5.1.18]	1.35994	0.310525	NA	0.561975
K02054	ABC.SP.P1; putative spermidine/putrescine transport system permease protein	1.50874	0.179527	NA	0.738962
K14728	K14728; phthiodiolone/phenolphthiodiolone dimycocerosates ketoreductase [EC:1.2.-.-]	1.55619	0.147169	NA	0.793089
K19967	dta; D-threonine aldolase [EC:4.1.2.42]	1.43338	0.235309	NA	0.653015
K01470	E3.5.2.10; creatinine amidohydrolase [EC:3.5.2.10]	1.3577	0.312038	NA	0.561591
K00010	iolG; myo-inositol 2-dehydrogenase / D-chiro-inositol 1-dehydrogenase [EC:1.1.1.18 1.1.1.369]	1.4327	0.236485	NA	0.652905
K03496	parA, soj; chromosome partitioning protein	1.55671	0.14542	NA	0.793173
K01580	E4.1.1.15, gadB, gadA, GAD; glutamate decarboxylase [EC:4.1.1.15]	1.30831	0.371641	NA	0.497461
K01191	MAN2C1; alpha-mannosidase [EC:3.2.1.24]	1.30876	0.371578	NA	0.497539
K03413	cheY; two-component system, chemotaxis family, chemotaxis protein CheY	1.50614	0.630236	NA	0.237956
K09613	COPS5, CSN5; COP9 signalosome complex subunit 5 [EC:3.4.-.-]	1.63121	0.107292	NA	0.871234
K03292	TC.GPH; glycoside/pentoside/hexuronide:cation symporter, GPH family	1.5798	0.133384	NA	0.819397
K03856	AROA2, aroA; 3-deoxy-7-phosphoheptulonate synthase [EC:2.5.1.54]	1.92792	0.902652	NA	0.0515539
K03680	EIF2B4; translation initiation factor eIF-2B subunit delta	1.41015	0.258286	NA	0.623503
K07011	#N/A	1.85294	0.223109	NA	0.600857
K13953	adhP; alcohol dehydrogenase, propanol-preferring [EC:1.1.1.1]	1.26055	0.442311	NA	0.430627
K04649	HIP2, UBC1; ubiquitin-conjugating enzyme (huntingtin interacting protein 2) [EC:2.3.2.23]	1.21232	0.521843	NA	0.360449
K10439	rbsB; ribose transport system substrate-binding protein	1.25985	0.442427	NA	0.4305
K00254	DHODH, pyrD; dihydroorotate dehydrogenase [EC:1.3.5.2]	2.00244	0.9698	NA	0.015578
K00852	rbsK, RBKS; ribokinase [EC:2.7.1.15]	1.31054	0.215232	NA	-0.582546
K00004	BDH, butB; (R,R)-butanediol dehydrogenase / meso-butanediol dehydrogenase / diacetyl reductase [EC:1.1.1.4 1.1.1.- 1.1.1.303]	1.50751	0.847841	NA	0.0924232
K00266	gltD; glutamate synthase (NADPH) small chain [EC:1.4.1.13]	1.40881	0.258414	NA	0.623288
K03627	MBF1; putative transcription factor	1.95292	0.94019	NA	-0.0309791
K03239	EIF2B1; translation initiation factor eIF-2B subunit alpha	1.33711	0.975438	NA	0.0155409
K05772	tupA, vupA; tungstate transport system substrate-binding protein	1.82846	0.712309	NA	-0.154489
K03169	topB; DNA topoisomerase III [EC:5.6.2.1]	1.87834	0.432348	NA	0.354852
K10440	rbsC; ribose transport system permease protein	1.40813	0.262965	NA	0.623163
K15429	TRM5, TRMT5; tRNA (guanine37-N1)-methyltransferase [EC:2.1.1.228]	1.95292	0.94019	NA	-0.0309791
K00242	sdhD, frdD; succinate dehydrogenase membrane anchor subunit	1.85325	0.959943	NA	-0.0213726
K15778	pmm-pgm; phosphomannomutase / phosphoglucomutase [EC:5.4.2.8 5.4.2.2]	1.95292	0.858308	NA	0.0750472
K07004	K07004; uncharacterized protein	1.77735	0.971742	NA	0.0155568
K22424	E2.7.3.13; glutamine kinase [EC:2.7.3.13]	1.38423	0.472331	NA	-0.340776
K06864	larE; pyridinium-3,5-biscarboxylic acid mononucleotide sulfurtransferase [EC:4.4.1.37]	1.95335	0.940287	NA	-0.03093
K19286	nfrA2; FMN reductase [NAD(P)H] [EC:1.5.1.39]	1.8791	0.803353	NA	-0.103706
K01246	tag; DNA-3-methyladenine glycosylase I [EC:3.2.2.20]	1.21071	0.522146	NA	0.360155
K07316	mod; adenine-specific DNA-methyltransferase [EC:2.1.1.72]	1.97792	0.985496	NA	-0.00748523
K21417	acoB; acetoin:2,6-dichlorophenolindophenol oxidoreductase subunit beta [EC:1.1.1.-]	1.43578	0.000121174	NA	-1.59246
K16306	K16306; fructose-bisphosphate aldolase / 2-amino-3,7-dideoxy-D-threo-hept-6-ulosonate synthase [EC:4.1.2.13 2.2.1.10]	1.97792	0.985496	NA	-0.00748523
K04485	radA, sms; DNA repair protein RadA/Sms	1.35886	0.618228	NA	-0.24164
K00102	LDHD, dld; D-lactate dehydrogenase (cytochrome) [EC:1.1.2.4]	1.60708	0.662635	NA	0.208033
K00805	hepS; heptaprenyl diphosphate synthase component 1 [EC:2.5.1.30]	1.23621	0.480512	NA	0.395925
K11072	potA; spermidine/putrescine transport system ATP-binding protein [EC:7.6.2.11]	1.38373	0.283513	NA	0.592852
K15866	paaG; 2-(1,2-epoxy-1,2-dihydrophenyl)acetyl-CoA isomerase [EC:5.3.3.18]	1.28744	0.0549158	NA	-0.874053
K06857	tupC, vupC; tungstate transport system ATP-binding protein [EC:7.3.2.6]	1.31006	0.730774	NA	-0.170064
K04034	bchE; anaerobic magnesium-protoporphyrin IX monomethyl ester cyclase [EC:1.21.98.3]	1.60536	0.875043	NA	0.0734292
K08688	E3.5.3.3; creatinase [EC:3.5.3.3]	1.21232	0.521843	NA	0.360449
K05396	dcyD; D-cysteine desulfhydrase [EC:4.4.1.15]	1.3106	0.371324	NA	0.497855
K00931	proB; glutamate 5-kinase [EC:2.7.2.11]	1.28373	0.405549	NA	0.464311
K00605	gcvT, AMT; aminomethyltransferase [EC:2.1.2.10]	1.28689	0.405076	NA	0.464861
K19285	nfrA1; FMN reductase (NADPH) [EC:1.5.1.38]	1.75403	0.580078	NA	-0.233978
K01092	E3.1.3.25, IMPA, suhB; myo-inositol-1(or 4)-monophosphatase [EC:3.1.3.25]	1.95335	0.940287	NA	-0.03093
K07991	flaK; archaeal preflagellin peptidase FlaK [EC:3.4.23.52]	1.97792	0.985496	NA	-0.00748523
K21903	cadC, smtB; ArsR family transcriptional regulator, lead/cadmium/zinc/bismuth-responsive transcriptional repressor	1.28621	0.18431	NA	-0.621969
K01466	allB; allantoinase [EC:3.5.2.5]	1.28801	0.471241	NA	-0.350515
K15020	K15020; acryloyl-coenzyme A reductase [EC:1.3.1.84]	1.85285	0.757733	NA	-0.128991
K10117	msmE; raffinose/stachyose/melibiose transport system substrate-binding protein	1.65391	0.0975525	NA	0.896054
K19341	nosY; Cu-processing system permease protein	1.40851	0.516708	NA	-0.30595
K18702	uctC; CoA:oxalate CoA-transferase [EC:2.8.3.19]	1.21294	0.0603745	NA	-0.879223
K17947	wbiB; dTDP-L-rhamnose 4-epimerase [EC:5.1.3.25]	1.33397	0.519161	NA	0.34573
K09181	yfiQ; acetyltransferase	1.78048	0.404917	NA	0.390773
K22175	fqoH; F420H2:quinone oxidoreductase subunit H [EC:1.1.98.4]	1.87828	0.803157	NA	-0.103805
K15509	hpsN; sulfopropanediol 3-dehydrogenase [EC:1.1.1.308]	1.85285	0.757452	NA	-0.128988
K18367	CoADR; CoA-dependent NAD(P)H sulfur oxidoreductase [EC:1.8.1.18]	1.60684	0.346254	NA	-0.40719
K15888	uppS, cpdS; tritrans,polycis-undecaprenyl-diphosphate synthase [geranylgeranyl-diphosphate specific] [EC:2.5.1.89]	1.9527	0.940141	NA	-0.0310044
K15724	erpA; iron-sulfur cluster insertion protein	1.80328	0.667453	NA	-0.180549
K06132	clsC; cardiolipin synthase C [EC:2.7.8.-]	1.80593	0.86868	NA	-0.0717109
K22503	DARS1; aspartyl-tRNA synthetase [EC:6.1.1.12]	1.92785	0.89457	NA	-0.0548705
K06019	ppaX; pyrophosphatase PpaX [EC:3.6.1.1]	1.21237	0.205636	NA	-0.610701
K17942	pmd; phosphomevalonate decarboxylase [EC:4.1.1.99]	1.92835	0.894685	NA	-0.0548121
K08221	yitG, ymfD, yfmO; MFS transporter, ACDE family, multidrug resistance protein	1.483	0.19531	NA	-0.569526
K01664	pabA; para-aminobenzoate synthetase component II [EC:2.6.1.85]	1.97699	0.62673	NA	0.20835
K01817	trpF; phosphoribosylanthranilate isomerase [EC:5.3.1.24]	1.90335	0.746766	NA	0.139142
K15879	narC; cytochrome b-561	1.82828	0.712266	NA	-0.154511
K13832	aroDE, DHQ-SDH; 3-dehydroquinate dehydratase / shikimate dehydrogenase [EC:4.2.1.10 1.1.1.25]	1.97742	0.985429	NA	-0.007544
K05829	lysY, argC; [amino group carrier protein]-6-phospho-L-2-aminoadipate/5-phospho-L-glutamate reductase [EC:1.2.1.103 1.2.1.106]	1.90382	0.849212	NA	-0.0790409
K02827	qoxB; cytochrome aa3-600 menaquinol oxidase subunit I [EC:7.1.1.5]	1.87742	0.803176	NA	-0.103912
K02826	qoxA; cytochrome aa3-600 menaquinol oxidase subunit II [EC:7.1.1.5]	1.87726	0.614374	NA	-0.206956
K01473	hyuA; N-methylhydantoinase A [EC:3.5.2.14]	1.92703	0.903666	NA	0.0514325
K22051	mscM, bspA; miniconductance mechanosensitive channel	1.21237	0.0293221	NA	-1.00749
K14467	4hbl; 4-hydroxybutyrate---CoA ligase (AMP-forming) [EC:6.2.1.40]	1.50671	0.345159	NA	-0.419962
K05576	ndhE; NAD(P)H-quinone oxidoreductase subunit 4L [EC:7.1.1.2]	1.70543	0.691884	NA	0.182432
K11381	bkdA; 2-oxoisovalerate dehydrogenase E1 component [EC:1.2.4.4]	1.26237	0.00984054	NA	-1.15968
K04752	glnK; nitrogen regulatory protein P-II 2	1.72839	0.853957	NA	0.0825337
K10848	ERCC4, XPF; DNA excision repair protein ERCC-4 [EC:3.1.-.-]	1.95335	0.940287	NA	-0.03093
K18105	rtcA; RNA 3'-terminal phosphate cyclase (GTP) [EC:6.5.1.5]	1.9281	0.894743	NA	-0.054842
K08964	mtnB; methylthioribulose-1-phosphate dehydratase [EC:4.2.1.109]	1.30997	0.342522	NA	-0.450459
K22180	fqoM; F420H2:quinone oxidoreductase subunit M [EC:1.1.98.4]	1.85371	0.63757	NA	0.208395
K13722	trf2_3; tricorn protease interacting factor F2/3 [EC:3.4.11.-]	1.48331	0.315236	NA	0.530344
K22176	fqoI; F420H2:quinone oxidoreductase subunit I [EC:1.1.98.4]	1.78021	0.570543	NA	0.258706
K16318	trm14; tRNA (guanine6-N2)-methyltransferase [EC:2.1.1.256]	1.70564	0.503818	NA	0.314937
K09011	cimA; (R)-citramalate synthase [EC:2.3.3.21]	1.90376	0.849375	NA	-0.0790486
K21142	moaX; MoaE-MoaD fusion protein [EC:2.8.1.12]	1.92787	0.894577	NA	-0.0548672
K01907	AACS, acsA; acetoacetyl-CoA synthetase [EC:6.2.1.16]	1.67914	0.461382	NA	-0.318214
K11755	hisIE; phosphoribosyl-AMP cyclohydrolase / phosphoribosyl-ATP pyrophosphohydrolase [EC:3.5.4.19 3.6.1.31]	1.95292	0.940254	NA	-0.0309796
K21148	cysM; [CysO sulfur-carrier protein]-thiocarboxylate-dependent cysteine synthase [EC:2.5.1.113]	1.97749	0.985416	NA	-0.0075341
K22159	fpoB; F420H2 dehydrogenase subunit B [EC:1.5.98.3]	1.95292	0.858308	NA	0.0750472
K18021	cutB; glyceraldehyde dehydrogenase medium subunit [EC:1.2.99.8]	1.58222	0.31174	NA	-0.438207
K09887	dcd; dCTP deaminase (dUMP-forming) [EC:3.5.4.30]	1.95274	0.743822	NA	-0.132864
K19412	argX; glutamate---[amino group carrier protein] ligase [EC:6.3.2.60]	1.87914	0.803361	NA	-0.103701
K21065	E3.2.1.197; beta-1,2-mannosidase [EC:3.2.1.197]	1.26027	0.441729	NA	0.430577
K07325	flaB; archaeal flagellin FlaB	1.77981	0.623648	NA	-0.206866
K01665	pabB; para-aminobenzoate synthetase component I [EC:2.6.1.85]	1.92792	0.705206	NA	0.162583
K07405	E3.2.1.1A; alpha-amylase [EC:3.2.1.1]	1.43161	0.235462	NA	0.652737
K03775	slyD; FKBP-type peptidyl-prolyl cis-trans isomerase SlyD [EC:5.2.1.8]	1.97792	0.985496	NA	-0.00748523
K07219	K07219; putative molybdopterin biosynthesis protein	1.8558	0.211223	NA	0.600521
K12297	rlmKL; 23S rRNA (guanine2069-N7)-methyltransferase / 23S rRNA (guanine2445-N2)-methyltransferase [EC:2.1.1.264 2.1.1.173]	1.23601	0.380635	NA	-0.428997
K05828	lysZ, argB; [amino group carrier protein]-L-2-aminoadipate/L-glutamate 6-kinase [EC:2.7.2.17 2.7.2.19]	1.90367	0.849006	NA	-0.0790584
K21028	ynjE; molybdopterin synthase sulfurtransferase [EC:2.8.1.11]	1.80371	0.667557	NA	-0.180494
K16792	aksD; methanogen homoaconitase large subunit [EC:4.2.1.114]	1.43161	0.235462	NA	0.652737
K15863	nuoLM; NADH-quinone oxidoreductase subunit L/M [EC:7.1.1.2]	1.50675	0.288262	NA	0.558714
K04656	hypF; hydrogenase maturation protein HypF	1.85418	0.0426466	NA	1.08282
K07732	rfk; riboflavin kinase, archaea type [EC:2.7.1.161]	1.97792	0.985496	NA	-0.00748523
K16881	K16881; mannose-1-phosphate guanylyltransferase / phosphomannomutase [EC:2.7.7.13 5.4.2.8]	1.67929	0.0874851	NA	0.920817
K03055	rpoK; DNA-directed RNA polymerase subunit K [EC:2.7.7.6]	1.77951	0.270388	NA	0.529858
K15014	SLC29A1_2_3, ENT1_2_3; solute carrier family 29 (equilibrative nucleoside transporter), member 1/2/3	1.43161	0.235462	NA	0.652737
K15526	mshC; L-cysteine:1D-myo-inositol 2-amino-2-deoxy-alpha-D-glucopyranoside ligase [EC:6.3.1.13]	1.57964	0.131354	NA	0.8194
K05800	ybaO; Lrp/AsnC family transcriptional regulator	1.75451	0.0642371	NA	0.992518
K09716	dtdA, GEK1; D-aminoacyl-tRNA deacylase [EC:3.1.1.96]	1.92853	0.705693	NA	0.162469
K18126	sskdgK; 2-dehydro-3-deoxygluconokinase / 2-dehydro-3-deoxygalactonokinase [EC:2.7.1.178]	1.70429	0.0788937	NA	0.945106
K06024	scpB; segregation and condensation protein B	1.97792	0.985496	NA	-0.00748523
K15652	asbF; 3-dehydroshikimate dehydratase [EC:4.2.1.118]	1.38222	0.283672	NA	0.592605
K11705	mtsC; iron/zinc/manganese/copper transport system permease protein	1.67962	0.375411	NA	0.430147
K11601	mntC; manganese transport system substrate-binding protein	1.67858	0.088046	NA	0.920717
K00029	E1.1.1.40, maeB; malate dehydrogenase (oxaloacetate-decarboxylating)(NADP+) [EC:1.1.1.40]	1.90212	0.84898	NA	-0.0792486
K20611	crtD; 1-hydroxy-2-isopentenylcarotenoid 3,4-desaturase [EC:1.3.99.37]	1.28545	0.405291	NA	0.464611
K10778	ada; AraC family transcriptional regulator, regulatory protein of adaptative response / methylated-DNA-[protein]-cysteine methyltransferase [EC:2.1.1.63]	1.33444	0.339896	NA	0.530132
K00042	garR, glxR; 2-hydroxy-3-oxopropionate reductase [EC:1.1.1.60]	1.43494	0.149792	NA	-0.639703
K20967	MOCS1; GTP 3',8-cyclase / cyclic pyranopterin monophosphate synthase [EC:4.1.99.22 4.6.1.17]	1.97817	0.985567	NA	-0.00745642
K06166	phnG; alpha-D-ribose 1-methylphosphonate 5-triphosphate synthase subunit PhnG [EC:2.7.8.37]	1.85338	0.286156	NA	-0.429605
K10109	malF; maltose/maltodextrin transport system permease protein	1.57921	0.132481	NA	0.819321
K10227	smoE, mtlE; polyol transport system substrate-binding protein	1.57921	0.131373	NA	0.81934
K07574	yhbY; RNA-binding protein	1.48211	0.194506	NA	0.710632
K10896	FANCM; fanconi anemia group M protein	1.58254	0.0736263	NA	-0.75779
K09699	DBT, bkdB; 2-oxoisovalerate dehydrogenase E2 component (dihydrolipoyl transacylase) [EC:2.3.1.168]	1.21237	0.0293221	NA	-1.00749
K06861	lptB; lipopolysaccharide export system ATP-binding protein [EC:7.5.2.5]	1.21237	0.0293221	NA	-1.00749
K20608	tet; tetrahedral aminopeptidase [EC:3.4.11.-]	1.7803	0.45313	NA	-0.311789
K11991	tadA; tRNA(adenine34) deaminase [EC:3.5.4.33]	1.30971	0.343211	NA	-0.450627
K00189	vorG, porG; 2-oxoisovalerate/pyruvate ferredoxin oxidoreductase gamma subunit [EC:1.2.7.7 1.2.7.1]	1.40709	0.258578	NA	0.623012
K03820	lnt; apolipoprotein N-acyltransferase [EC:2.3.1.269]	1.28373	0.405549	NA	0.464311
K16509	spxA; regulatory protein spx	1.25916	0.441908	NA	0.430381
K22099	folC2; dihydrofolate synthase / folylpolyglutamate synthase [EC:6.3.2.12 6.3.2.17]	1.28373	0.405549	NA	0.464311
K00211	TYR1; prephenate dehydrogenase (NADP+) [EC:1.3.1.13]	1.43134	0.235486	NA	0.652695
K10111	malK, mtlK, thuK; multiple sugar transport system ATP-binding protein [EC:7.5.2.-]	1.25916	0.441908	NA	0.430381
K02062	thiQ; thiamine transport system ATP-binding protein [EC:7.6.2.15]	1.28373	0.405549	NA	0.464311
K10228	smoF, mtlF; polyol transport system permease protein	1.33681	0.342875	NA	0.530576
K20757	dthadh; threo-3-hydroxy-D-aspartate ammonia-lyase [EC:4.3.1.27]	1.40881	0.258414	NA	0.623288
K02473	wbpP; UDP-N-acetylglucosamine/UDP-N-acetylgalactosamine 4-epimerase [EC:5.1.3.7 5.1.3.-]	1.38263	0.283629	NA	0.592672
K01634	SGPL1, DPL1; sphinganine-1-phosphate aldolase [EC:4.1.2.27]	1.30831	0.371641	NA	0.497461
K05814	ugpA; sn-glycerol 3-phosphate transport system permease protein	1.35959	0.311175	NA	0.561917
K19070	oorA; oxalate oxidoreductase subunit alpha [EC:1.2.7.10]	1.25916	0.441908	NA	0.430381
K18593	E6.2.1.56; 4-hydroxybutyrate---CoA ligase (ADP-forming) [EC:6.2.1.56]	1.21002	0.522275	NA	0.360029
K02101	araL; sugar-phosphatase [EC:3.1.3.23]	1.28664	0.405113	NA	0.464819
K04518	pheA2; prephenate dehydratase [EC:4.2.1.51]	1.95256	0.858525	NA	0.0750071
K12454	rfbE; CDP-paratose 2-epimerase [EC:5.1.3.10]	1.31016	0.786617	NA	0.141103
K07233	pcoB, copB; copper resistance protein B	1.85179	0.834798	NA	0.0908954
K18594	K18594; 3-hydroxypropionyl-CoA synthetase (ADP-forming) [EC:6.2.1.-]	1.30896	0.371551	NA	0.497573
K22348	moxA; manganese oxidase [EC:1.16.3.3]	1.87625	0.791893	NA	0.115112
K13421	UMPS; uridine monophosphate synthetase [EC:2.4.2.10 4.1.1.23]	1.9527	0.940203	NA	-0.0310053
K11956	natD; neutral amino acid transport system permease protein	1.21237	0.0293221	NA	-1.00749
K13531	adaB; methylated-DNA-[protein]-cysteine S-methyltransferase [EC:2.1.1.63]	1.23734	0.800811	NA	-0.12903
K04093	pheA1; chorismate mutase [EC:5.4.99.5]	1.75532	0.772689	NA	-0.124258
K18357	padE; phenylglyoxylate dehydrogenase gamma subunit [EC:1.2.1.58]	1.28416	0.405485	NA	0.464386
K04092	tyrA1; chorismate mutase [EC:5.4.99.5]	1.75532	0.772689	NA	-0.124258
K14153	thiDE; hydroxymethylpyrimidine kinase / phosphomethylpyrimidine kinase / thiamine-phosphate diphosphorylase [EC:2.7.1.49 2.7.4.7 2.5.1.3]	1.36226	0.0502829	NA	-0.869494
K22316	rhnA-cobC; ribonuclease H / adenosylcobalamin/alpha-ribazole phosphatase [EC:3.1.26.4 3.1.3.73]	1.92812	0.894634	NA	-0.0548379
K18540	ramA; (R)-amidase [EC:3.5.1.100]	1.80262	0.667295	NA	-0.180632
K13927	citXG; holo-ACP synthase / triphosphoribosyl-dephospho-CoA synthase [EC:2.7.7.61 2.4.2.52]	1.53222	0.382126	NA	-0.387414
K21268	gdS-2; hexaprenyl diphosphate synthase [EC:2.5.1.82]	1.68088	0.456694	NA	-0.317924
K20446	ndhS; nicotinate dehydrogenase small FeS subunit [EC:1.17.1.5]	1.75371	0.772212	NA	-0.124674
K02828	qoxC; cytochrome aa3-600 menaquinol oxidase subunit III [EC:7.1.1.5]	1.87742	0.803176	NA	-0.103912
K22166	fpoK; F420H2 dehydrogenase subunit K [EC:1.5.98.3]	1.23778	0.381047	NA	-0.428673
K15583	oppD; oligopeptide transport system ATP-binding protein	1.23505	0.480716	NA	0.395716
K07057	bpsA; N4-bis(aminopropyl)spermidine synthase [EC:2.5.1.128]	1.23734	0.480314	NA	0.39613
K11395	kdpgA; 2-dehydro-3-deoxy-phosphogluconate/2-dehydro-3-deoxy-6-phosphogalactonate aldolase [EC:4.1.2.55]	1.65387	0.406031	NA	0.404213
K09015	sufD; Fe-S cluster assembly protein SufD	1.95335	0.940287	NA	-0.03093
K19972	psaC, scaB, sloB; manganese/zinc transport system permease protein	1.67962	0.375411	NA	0.430147
K11604	sitA; manganese/iron transport system substrate-binding protein	1.67858	0.088046	NA	0.920717
K18564	thnP; methyltransferase [EC:2.1.1.-]	1.55536	0.973481	NA	0.0156184
K00220	tyrC; cyclohexadieny/prephenate dehydrogenase [EC:1.3.1.43 1.3.1.12]	1.43134	0.235486	NA	0.652695
K14578	nahAb, nagAb, ndoA, nbzAb, dntAb; naphthalene 1,2-dioxygenase ferredoxin component	1.23459	0.480796	NA	0.395634
K08364	merP; periplasmic mercuric ion binding protein	1.50596	0.176603	NA	0.738521
K18933	mfnA, adc; tyrosine decarboxylase / aspartate 1-decarboxylase [EC:4.1.1.25 4.1.1.11]	1.30831	0.371641	NA	0.497461
K22349	mnxG; manganese oxidase [EC:1.16.3.3]	1.85179	0.834798	NA	0.0908954
K17828	pyrDI; dihydroorotate dehydrogenase (NAD+) catalytic subunit [EC:1.3.1.14]	2.00244	0.9698	NA	0.015578
K15408	coxAC; cytochrome c oxidase subunit I+III [EC:7.1.1.9]	1.92665	0.70053	NA	-0.157199
K14628	actVI2; enoyl reductase	1.77735	0.971742	NA	0.0155568
K22160	fpoC; F420H2 dehydrogenase subunit C [EC:1.5.98.3]	1.97792	0.815059	NA	0.0981655
K22173	fqoD; F420H2:quinone oxidoreductase subunit D [EC:1.1.98.4]	1.97792	0.985496	NA	-0.00748523
K13930	mdcB; triphosphoribosyl-dephospho-CoA synthase [EC:2.4.2.52]	1.53222	0.382126	NA	-0.387414
K19190	nboR; nicotine blue oxidoreductase [EC:1.1.1.328]	1.21116	0.52206	NA	0.360238
K11704	mtsA; iron/zinc/manganese/copper transport system substrate-binding protein	1.38381	0.284717	NA	0.592863
K17238	inoF; inositol-phosphate transport system permease protein	1.6055	0.1191	NA	0.845559
K15334	NCL1, TRM4; multisite-specific tRNA:(cytosine-C5)-methyltransferase [EC:2.1.1.202]	1.31278	0.122754	NA	-0.709113
K17245	chiF; putative chitobiose transport system permease protein	1.48315	0.194922	NA	0.710792
K18358	padF; phenylglyoxylate dehydrogenase delta subunit [EC:1.2.1.58]	1.25916	0.441908	NA	0.430381
K10193	togM; oligogalacturonide transport system permease protein	1.23459	0.480796	NA	0.395634
K17316	gtsB, glcF; glucose/mannose transport system permease protein	1.70391	0.0799299	NA	0.945049
K04516	AROA1, aroA; chorismate mutase [EC:5.4.99.5]	1.73075	0.72603	NA	-0.151208
K19971	psaA, scaA, sloC; manganese/zinc transport system substrate-binding protein	1.38381	0.284717	NA	0.592863

## Sheet: Source Data 2
Source Data 2. Amino acid compositions (%) in high-quality genomes in the study
Genome	Taxonomy	Leucine	Valine	Isoleucine	Alanine	Cysteine	Aspartic acid	Glutamic acid	Phenylalanine	Glycine	Histidine	Lysine	Methionine	Asparagine	Proline	Glutamine	Arginine	Serine	Threonine	Tryptophan	Tyrosine
LZTs	Calditenuis ramacidaminiphagus	10.9316	10.1475	4.97683	8.65522	0.767574	4.47142	7.86872	3.51544	8.23532	1.62914	3.68318	2.30903	2.17392	4.77884	1.96745	8.57733	6.05922	4.69704	1.15375	3.05898
GC11.bin.20	Calditenuis aerorheumatis	10.8828	10.2263	4.93027	8.75527	0.765471	4.37292	8.02802	3.47944	8.19635	1.61576	3.98888	2.30793	2.12259	4.77215	2.00138	8.48641	6.00911	4.60513	1.09768	3.02157
GR03.bin.30	Calditenuis aerorheumatis	10.8996	10.2085	4.92091	8.74456	0.756303	4.37189	8.01894	3.48503	8.22701	1.60831	3.98125	2.30272	2.12457	4.76981	2.00051	8.4915	6.03586	4.60622	1.10481	3.00649
NM01.bin.13	Calditenuis aerorheumatis	10.9479	10.2242	4.9095	8.75541	0.762502	4.37051	8.10004	3.4513	8.24262	1.60464	3.95792	2.31088	2.10099	4.73532	1.99643	8.55836	6.0083	4.55626	1.1029	2.96369
146_bin.25	Calditenuis fumarioli	11.0422	10.1004	4.85871	8.78617	0.792121	4.47489	7.6818	3.43998	8.23599	1.63322	3.45835	2.28073	2.16355	4.8319	2.04089	8.82522	6.14189	4.65709	1.17298	3.03843
Aig_JZ_bin_19	Calditenuis fumarioli	11.0182	10.0489	4.84221	8.78218	0.80371	4.49324	7.73992	3.39356	8.22992	1.65114	3.48221	2.29447	2.13389	4.82448	2.02409	8.93309	6.14842	4.61816	1.16396	3.02928
BF2.bins.69.201808	Calditenuis fumarioli	11.0182	10.0445	4.84154	8.72925	0.797474	4.5089	7.79425	3.39164	8.24935	1.67467	3.49108	2.28258	2.14328	4.80699	2.02812	8.95934	6.14261	4.58752	1.1507	3.01073
GXS.bins.5.201803	Calditenuis fumarioli	11.0949	10.132	4.79665	8.78498	0.793792	4.47932	7.77787	3.3931	8.27739	1.64132	3.43923	2.2942	2.10878	4.7812	2.02046	8.95841	6.16053	4.59325	1.1388	2.98237
JZ-1.bins.49.201705	Calditenuis fumarioli	11.0323	10.0058	4.83848	8.75653	0.818544	4.47896	7.75494	3.39382	8.22193	1.64706	3.45264	2.30967	2.11167	4.8321	2.03988	8.95633	6.1683	4.6345	1.17069	3.02911
GBS60_51	Ardentivivens gerlachensis	11.2476	8.58504	6.24741	8.89717	0.86276	4.23881	7.28133	3.33438	8.16188	1.64377	3.92014	2.2498	2.24574	4.85632	2.18179	7.95762	6.51293	4.57414	1.2321	3.42739
GBS70_36	Ardentivivens gerlachensis	11.2604	8.53453	6.15014	8.86652	0.874793	4.25644	7.40732	3.31945	8.10497	1.65158	3.91909	2.22526	2.23427	4.88567	2.17165	8.07172	6.501	4.53803	1.24088	3.45113
GBS85_8	Ardentivivens gerlachensis	11.2719	8.56874	6.09813	8.9911	0.882825	4.21905	7.37676	3.28093	8.20494	1.64504	3.85809	2.22198	2.19846	4.90093	2.15949	8.10218	6.50134	4.50709	1.24662	3.42092
GC11.bin.3	Ardentivivens yellowstonensis	11.2468	8.51236	6.19364	8.67429	0.855021	4.21499	7.19724	3.35045	8.02412	1.66875	4.0656	2.29301	2.35252	4.83216	2.20961	8.03829	6.4661	4.63703	1.28091	3.5136
MGB03.bin.5	Ardentivivens yellowstonensis	11.1865	8.53228	6.34594	8.59503	0.864899	4.23715	7.01457	3.42672	8.08	1.68035	4.0971	2.28649	2.36379	4.89951	2.22123	7.8117	6.48147	4.71378	1.31768	3.49122
N02.bin.19	Ardentivivens yellowstonensis	11.0233	8.28467	6.26077	8.52837	0.871801	4.28618	7.32393	3.46217	7.83047	1.67988	4.21924	2.2327	2.45515	4.9177	2.38271	7.8904	6.35673	4.73375	1.38726	3.49233
NM01.bin.23	Ardentivivens yellowstonensis	11.0707	8.47468	6.18751	8.36003	0.892107	4.34588	7.27812	3.48725	7.82058	1.66638	4.39944	2.28969	2.43915	4.85587	2.20098	7.90812	6.32927	4.68683	1.34234	3.60358
SKYB10	Caldarincola sungkaiensis	10.5239	9.19836	6.76604	6.91036	0.903237	4.96314	7.10435	3.56466	7.58505	1.70852	4.58423	2.43397	2.92756	4.38229	1.90497	7.714	7.00255	4.94448	1.06621	3.47357
HRBIN02	Candentenecus caldifluvii	10.8707	8.42812	6.84258	8.043	0.939579	4.36506	7.23062	3.56927	7.90507	1.71625	4.67507	2.34505	2.57721	4.65029	2.20321	7.4464	6.40283	4.61381	1.26831	3.52537
Aig_Gxs02	Candentenecus fervidifontanae	11.0439	8.46746	6.67811	8.22032	0.919537	4.31096	7.32371	3.55771	7.90826	1.6723	4.59744	2.25612	2.59015	4.62906	2.25926	7.28317	6.73265	4.57934	1.21446	3.40856
BF3.bins.54.201808	Candentenecus fervidifontanae	11.0545	8.43579	6.6342	8.34063	0.895308	4.28527	7.3597	3.52733	7.92684	1.63655	4.56121	2.24948	2.56286	4.62011	2.26784	7.32297	6.76442	4.60962	1.1982	3.39831
GXS.bins.45.201907	Candentenecus fervidifontanae	10.9981	8.44158	6.64006	8.31285	0.906957	4.32815	7.40387	3.53425	7.90641	1.65104	4.60636	2.2464	2.58177	4.61875	2.26967	7.30877	6.75311	4.57019	1.20793	3.37466
JZ-3.bins.124.201901	Candentenecus fervidifontanae	11.0286	8.4316	6.67511	8.28487	0.904913	4.30875	7.30074	3.56519	7.88046	1.6676	4.58353	2.25834	2.59794	4.63371	2.2651	7.26271	6.73205	4.63236	1.22493	3.41216
JZ-3.bins.65.201907	Candentenecus fervidifontanae	11.0102	8.42415	6.70803	8.28003	0.899136	4.32331	7.32557	3.56307	7.86738	1.66389	4.62365	2.24772	2.60173	4.63695	2.266	7.25173	6.69639	4.63196	1.22821	3.40447
Aig_JZ_bin_40	Candentenecus silaniferventis	11.0017	8.40339	6.95035	8.09713	0.882409	4.30709	7.26477	3.54639	7.96616	1.66714	4.50796	2.3381	2.59828	4.65701	2.24042	7.24405	6.56934	4.67531	1.23939	3.50075
JZ-1.bins.101.201709	Candentenecus silaniferventis	10.9929	8.38103	6.94898	8.14274	0.881372	4.29274	7.29087	3.51337	7.99226	1.66258	4.49033	2.35619	2.59266	4.67831	2.2375	7.25313	6.55083	4.67877	1.23904	3.48386
JZ-1.bins.34.201803	Candentenecus silaniferventis	10.9883	8.37256	6.9776	8.08129	0.884106	4.29444	7.38894	3.51888	7.99882	1.66368	4.54261	2.346	2.58038	4.65541	2.2322	7.28792	6.57201	4.59825	1.2185	3.45746
JZ-1.bins.71.201901	Candentenecus silaniferventis	11.0086	8.39589	6.92507	8.13414	0.880185	4.28836	7.29464	3.51961	8.00213	1.66137	4.49496	2.35236	2.59218	4.67262	2.24251	7.26141	6.55415	4.65341	1.2389	3.4839
JZ-1.bins.81.201705	Candentenecus silaniferventis	10.9624	8.41591	6.90833	8.10791	0.884228	4.31104	7.34964	3.49048	7.99207	1.67399	4.47768	2.34285	2.57913	4.66937	2.23919	7.30367	6.56333	4.68156	1.2313	3.4737
JZ-2.bins.112.201808	Candentenecus silaniferventis	10.9997	8.34119	6.94241	8.08994	0.882484	4.30392	7.33503	3.53224	7.99132	1.67394	4.53563	2.34586	2.58171	4.65976	2.2238	7.30561	6.55438	4.64023	1.23925	3.47776
JZ-2.bins.138.201901	Candentenecus silaniferventis	10.9832	8.35297	6.95234	8.0755	0.884486	4.30067	7.36459	3.50068	7.97926	1.67606	4.54623	2.34995	2.55646	4.68586	2.24427	7.32451	6.55387	4.60418	1.22884	3.48842
JZ-2.bins.180.201705	Candentenecus silaniferventis	10.9788	8.3884	6.97195	8.10866	0.879989	4.3162	7.23086	3.55788	7.97449	1.66352	4.47909	2.34225	2.60774	4.70292	2.23702	7.20543	6.55015	4.70862	1.2575	3.49957
JZ-2.bins.181.201709	Candentenecus silaniferventis	10.9791	8.33883	6.95558	8.10805	0.881663	4.30588	7.30787	3.50664	7.96299	1.67973	4.53642	2.34521	2.58753	4.67324	2.23383	7.26689	6.54489	4.67889	1.2542	3.50876
QQ.bins.227.201901	Candentenecus silaniferventis	10.9124	8.33893	7.07404	8.03564	0.870545	4.34836	7.23845	3.61462	7.96229	1.68361	4.63509	2.36491	2.66406	4.68981	2.22373	7.06047	6.46126	4.67119	1.27156	3.53782
QQ.bins.55.201709	Candentenecus silaniferventis	10.9904	8.3833	6.93787	8.128	0.877199	4.32614	7.29431	3.53243	8.00146	1.67489	4.50724	2.35709	2.60465	4.66603	2.22855	7.22254	6.52577	4.66779	1.24866	3.48318
QQ.bins.91.201705	Candentenecus silaniferventis	10.9982	8.39535	6.9206	8.1231	0.867393	4.31616	7.30432	3.51366	8.01863	1.6622	4.49751	2.35933	2.59087	4.67478	2.23519	7.22631	6.55406	4.67976	1.24818	3.47047
MH01.bin.61	Kaftimonas caldifontinalis	10.4185	7.92055	8.06852	7.47494	0.951695	4.58888	7.29551	3.58213	7.26429	1.58509	5.68412	2.53802	3.03894	4.42273	2.13173	6.49989	6.62696	4.83836	1.0972	3.62268
S04.bin.80	Kaftimonas caldifontinalis	10.4197	7.93796	7.97814	7.47562	0.966195	4.56204	7.36607	3.5187	7.31035	1.58845	5.6927	2.5292	2.99716	4.44418	2.12606	6.62488	6.6439	4.79535	1.08459	3.59182
GC01.bin.41	Kaftimonas geyserifluvii	10.5054	7.91332	7.69327	7.75472	1.00957	4.53518	7.42268	3.47831	7.37236	1.59481	5.3887	2.56983	2.88217	4.5324	2.10238	7.03684	6.61159	4.5259	1.09513	3.59934
DRTY-6.bins.153.201705	Kaftimonas yunnanensis	10.3616	7.34421	9.03617	6.98629	0.968579	4.56653	7.19668	3.69587	7.05018	1.59793	6.17329	2.50781	3.47977	4.38679	2.13093	5.99225	6.61512	4.80939	1.08001	3.66938
JZ-2.bins.188.201705	Kaftimonas yunnanensis	10.3256	7.3066	9.07133	6.92647	0.981463	4.60293	7.1565	3.81246	7.03103	1.59859	6.23917	2.49269	3.52272	4.41356	2.08747	5.85718	6.55447	4.78788	1.15364	3.73857
Benthortus_lauensis	Benthortus_lauensis	10.6043	8.39342	6.90679	7.84715	0.7535	4.36145	8.34117	3.43389	8.25815	1.71597	4.79413	2.58631	2.39403	4.84052	1.92602	7.89159	5.555	4.39462	1.2666	3.38988
Geocrenenecus_arthurdayi	Geocrenenecus_arthurdayi	10.3887	7.49268	9.27863	6.35815	0.925241	4.56346	7.98948	3.65906	6.74738	1.54013	6.90065	2.3047	3.33123	4.26924	1.97978	6.01956	6.22347	4.55674	1.10832	4.00661
Geocrenenecus_dongiae	Geocrenenecus_dongiae	10.3328	7.922	9.18677	5.98024	1.02455	4.50871	8.19382	3.80709	6.74436	1.56145	7.43505	2.38364	3.29923	4.23224	1.82351	5.67938	5.9217	4.59048	1.10168	3.92929
Geocrenenecus_huangii	Geocrenenecus_huangii	10.3868	7.74494	8.86494	6.32395	0.966981	4.6005	7.95693	3.78782	6.79423	1.60424	6.77838	2.38311	3.34523	4.25408	1.94981	5.9509	6.28041	4.65271	1.11557	3.90977
Terraquivivens_ruidianensis	Terraquivivens_ruidianensis	10.4197	8.56261	7.12568	7.55304	1.13826	4.70098	7.31872	3.85292	7.17362	1.6451	6.71319	2.77029	3.0869	4.36847	1.95812	5.80565	6.23686	4.70072	1.05392	3.46068
Terraquivivens_tengchongensis	Terraquivivens_tengchongensis	10.368	8.31872	7.70609	7.41079	1.17256	4.66496	7.41859	3.8482	7.0082	1.61227	7.07812	2.67268	3.27644	4.35784	1.95489	5.49893	6.06262	4.73677	1.02787	3.45287
Terraquivivens_tikiterensis	Terraquivivens_tikiterensis	10.4832	8.74473	6.36782	8.022	1.18265	4.57621	7.5644	3.6631	7.49104	1.59846	6.26521	2.65225	2.76625	4.42089	1.95204	6.76947	6.22736	4.3322	1.0798	3.46088
Terraquivivens_yellowstonensis	Terraquivivens_yellowstonensis	10.2643	8.33774	7.5575	7.71833	1.16966	4.63758	7.50492	3.80307	7.14109	1.58044	6.93809	2.63482	3.20643	4.46269	2.014	5.61379	6.00124	4.59287	1.03498	3.43755
Wolframiiraptoraceaemiiraptor_allenii	Wolframiiraptoraceaemiiraptor_allenii	10.7738	7.49625	7.93835	8.09166	1.06277	4.67632	7.98452	3.40947	7.78273	1.65129	5.11612	2.711	2.52273	4.56816	1.83446	7.74829	5.76894	3.85438	1.16404	3.47299
Wolframiiraptoraceaemiiraptor_gerlachensis	Wolframiiraptoraceaemiiraptor_gerlachensis	10.8898	7.46769	8.01914	8.14564	1.06321	4.65728	8.1935	3.3787	7.65834	1.63228	5.02886	2.69233	2.42988	4.56497	1.81058	7.95524	5.77203	3.77631	1.13789	3.34162
Wolframiiraptoraceaemiiraptor_sinensis	Wolframiiraptoraceaemiiraptor_sinensis	10.9539	7.15945	7.93289	8.67531	1.04582	4.64345	8.28648	3.33822	7.64387	1.64077	5.09122	2.68405	2.33498	4.54674	1.79529	7.94558	6.02791	3.56267	1.07994	3.23192
Caldiarchaeum_subterraneum	Ca. Caldarchaeum subterraneum	10.5545	9.16535	5.92185	8.40412	0.836987	4.49084	7.04275	3.93317	7.50782	1.79163	5.46194	2.42812	2.97834	4.60027	2.48934	6.44528	5.88723	5.20807	1.10578	3.39176
HRBIN01	Caldarchaeaceae HRBIN01	10.5649	8.6095	6.47616	8.19172	0.875018	4.66178	6.94096	3.59281	8.12111	1.75575	4.66879	2.51351	2.67336	4.65459	2.21446	7.16128	6.30673	4.92119	1.16466	3.57751
SZUA-1515	Caldarchaeaceae SZUA-1515	10.2504	8.44109	7.37088	7.85496	0.884255	4.48448	7.70611	3.60864	7.48025	1.71738	5.73763	2.41094	3.23393	4.42904	2.24181	6.60527	5.52255	4.95951	1.05662	3.66559
S146_89_esom	Caldarchaeaceae WAQC01	10.4397	8.03137	7.24043	8.87834	0.840744	4.49547	7.5345	3.58126	7.5393	1.74375	4.92403	2.50355	2.84529	4.45687	2.44396	7.03105	5.73364	4.84967	1.11969	3.42631
Ca_Nitrosocaldus_cavascurensis_SCU2	Ca_Nitrosocaldus_cavascurensis_SCU2	9.14831	7.79687	8.24815	7.60691	1.04747	6.09336	6.56553	3.1644	6.91085	1.96635	5.6732	3.40505	4.08088	3.34826	1.98833	6.4452	6.97612	4.27388	0.877972	4.00908
Ca_Nitrosocosmicus_hydrocola_G61	Ca_Nitrosocosmicus_hydrocola_G61	9.08349	5.99862	9.40972	5.03071	1.00406	5.77549	6.13788	4.52724	6.06506	1.78604	7.30291	2.36478	6.62834	3.62838	3.08331	3.68247	8.19528	5.5278	0.856351	3.49536
Ca_Nitrosopelagicus_brevis_CN25	Ca_Nitrosopelagicus_brevis_CN25	8.43265	6.43065	8.70978	6.02776	1.01381	5.84922	7.3275	4.42036	6.53648	1.7461	8.79207	2.67814	5.07294	3.67695	3.04998	3.49763	7.05736	5.41554	0.884434	3.00055
Ca_Nitrosotalaea_devaniterrae	Ca_Nitrosotalaea_devaniterrae	8.61025	6.98425	8.50648	6.26679	0.978088	5.50211	5.77757	4.17628	6.61399	1.92927	7.95941	2.633	4.89245	3.8816	3.36877	3.67131	7.58915	6.08267	0.904695	3.29226
Ca_Nitrosotenuis_chungbukensis_MY2	Ca_Nitrosotenuis_chungbukensis_MY2	8.61327	6.83117	8.50969	6.71915	0.982905	5.76476	6.21043	4.18476	6.5497	1.85172	8.22259	2.61189	4.56268	3.82147	3.30412	3.93068	7.19803	5.72029	0.868627	3.16151
Nitrosarchaeum_koreense_MY1	Nitrosarchaeum_koreense_MY1	8.58805	6.26635	9.46659	5.80404	1.02528	5.71951	6.62017	4.38341	6.36452	1.79242	8.72073	2.57673	5.16172	3.67991	3.17565	3.4222	7.22095	5.62362	0.878335	3.1122
Nitrosopumilus_maritimus_SCM1	Nitrosopumilus_maritimus_SCM1	8.39932	6.61217	8.4288	6.03143	0.979647	6.10049	7.30867	4.38576	6.42064	1.76558	8.36113	2.59564	4.87687	3.88871	3.20923	3.4069	7.17095	5.71603	0.890804	3.06597
Nitrososphaera_viennensis_EN76	Nitrososphaera_viennensis_EN76	8.52168	7.60755	6.40377	9.37985	0.972449	5.47985	6.20278	3.85492	7.47741	1.86977	6.44706	2.90398	3.65199	4.10155	3.17211	5.34944	6.74938	5.26851	0.986511	3.18383
